# Supplementary material
Source: publisher figshare collection journal article supplement (https://acs.figshare.com/ndownloader/files/3963382)
Supplement: Supplementary file 1 [file 3963382]

## Sheet: Sup Table 2
Supplemental Table 2 The total proteins from the posterior silk gland at 3rd day of 5th instar identified by the SDS-PAGE based proteomic technique
Protein ID	Description	Matched peptides	Frames	Hits	Fold ZB/Lan10	P-Value ZB/Lan10
gi_1377915	enhanced green fluorescent protein [Cloning vector pEGFP_C1]	6	8	36	4768.67	3.12742e-12
BGIBMGA010671	eukaryotic translation initiation factor 3 subunit K [B.mori]	5	6	30	160.393	0.0384129
gi_114053117	eukaryotic translation initiation factor 3 subunit K [B.mori]	4	5	13	157.116	0.0309536
BGIBMGA005466	putative alpha-adaptin-like protein [P.quinquepunctellus]	4	6	29	105.177	0.0474444
gi_112984078	40S ribosomal protein S4 [B.mori]	10	87	153	71.9121	7.6235e-10
BGIBMGA010867	40S ribosomal protein S4 [B.mori]	12	140	613	68.935	2.24742e-07
BGIBMGA013201	14-3-3 epsilon protein [B.mori]	15	49	196	59.9164	0.00330586
BGIBMGA003475	elongation factor 1 delta [B.mori]	10	15	81	49.2472	9.13839e-05
BGIBMGA010423	cytosolic malate dehydrogenase [B.mori]	6	8	26	44.7119	0.0187676
BGIBMGA011508	chaperonin [B.mori]	12	14	62	39.7927	0.00345249
gi_120444903	chaperonin [B.mori]	16	21	75	37.3548	0.0121834
BGIBMGA002565	PREDICTED: uncharacterized protein LOC100882428 [M.rotundata]	3	3	16	34.2533	0.0249364
gi_114053175	N_acetyl_glucosamine_6_phosphate isomerase [B.mori]	3	5	10	23.3976	0.000488729
BGIBMGA003311	hypothetical protein KGM_14582 [D.plexippus]	3	3	17	20.1678	0.000600924
BGIBMGA004847	protein transport protein sec13 [B.betularia]	6	6	49	14.4636	1.01824e-07
BGIBMGA008302	elongation factor 1 gamma [B.mori]	18	72	253	12.6521	0.0168261
BGIBMGA006583	cytosolic juvenile hormone binding protein 36 kDa subunit [B.mori]	5	5	22	11.9399	3.33046e-11
gi_112983082	cytosolic juvenile hormone binding protein 36 kDa subunit [B.mori]	5	5	13	11.3255	4.89397e-12
BGIBMGA008670	ATP synthase [B.mori]	9	15	86	10.4476	4.34936e-07
BGIBMGA002186	thiol peroxiredoxin [B.mori]	10	13	70	9.22682	0.0136994
BGIBMGA002644	RecName: Full=14-3-3 protein zeta	9	56	241	8.0614	2.71067e-18
gi_114052160	proteasome subunit alpha type 6_A [B.mori]	9	10	46	7.49648	2.73058e-05
BGIBMGA004657	proteasome subunit alpha type 6-A [B.mori]	5	6	13	7.11648	0.0047753
BGIBMGA002689	seroin 1 precursor [B.mori]	2	10	36	6.25681	0.00802142
BGIBMGA008768	ferritin precursor [B.mori]	2	2	6	5.90997	0.00853946
gi_28572004	triose phosphate isomerase_ isoform A [D.melanogaster]	3	3	21	5.38349	0.000361003
gi_304307739	tudor staphylococcus/micrococcal nuclease [B.mori]	39	68	401	5.32051	1.58924e-06
BGIBMGA009319	ribosomal protein S3 [B.mori]	17	138	763	4.74229	3.26884e-10
gi_187281708	triosephosphate isomerase [B.mori]	9	12	54	4.48244	0.0158055
gi_17530805	actin 5C_ isoform B [D.melanogaster]	12	60	225	4.11182	0.0294025
BGIBMGA001347	fibrohexamerin precursor [B.mori]	5	37	159	4.07651	0.000318922
gi_153791817	S_adenosyl_L_homocysteine hydrolase [B.mori]	7	8	24	3.95667	0.00248939
gi_290562453	H_ transporting ATP synthase O subunit isoform 2 [B.mori]	5	6	23	3.9116	0.0456525
BGIBMGA003073	translationally-controlled tumor protein homolog [B.mori]	6	8	23	3.90352	1.4718e-06
gi_112982880	translationally_controlled tumor protein homolog [B.mori]	6	24	76	3.90352	1.4718e-06
BGIBMGA011168	S-adenosyl-L-homocysteine hydrolase [B.mori]	9	10	34	3.85929	0.0375635
BGIBMGA007661	ribosomal protein L7A [B.mori]	11	53	229	3.85195	5.82128e-05
BGIBMGA002353	lysophospholipase [B.mori]	6	7	43	3.65929	0.0325827
BGIBMGA013945	actin [A.aegypti]	9	54	201	3.53119	0.015549
BGIBMGA012960	AGAP001957-PA [Anopheles gambiae str. PEST]	5	10	40	3.50779	1.2014e-10
BGIBMGA009830	eukaryotic translation initiation factor 6 [B.mori]	4	8	33	3.49063	0.00856946
BGIBMGA006462	eIF2B-alpha protein [B.mori]	2	2	8	3.44567	0.0382086
BGIBMGA001806	cleavage and polyadenylation specific factor 5 [B.mori]	4	4	18	3.44254	0.0103544
BGIBMGA011504	H+ transporting ATP synthase O subunit isoform 2 [B.mori]	9	14	48	3.24737	0.013653
BGIBMGA009974	hypothetical protein KGM_11297 [D.plexippus]	14	17	73	3.21925	0.0390238
BGIBMGA004376	proteasome subunit beta 5 [H.armigera]	5	5	26	3.21332	3.95961e-06
BGIBMGA002222	glutathione S-transferase delta 2 [B.mori]	8	10	37	3.19438	0.00846666
gi_187281831	actin_ muscle_type A2 [B.mori]	10	44	135	3.15343	0.00753592
BGIBMGA001395	proteasome beta 3 subunit [B.mori]	3	3	21	3.1259	2.18333e-10
BGIBMGA007267	NADH dehydrogenase [ubiquinone] 1 beta subcomplex subunit 10 [B.mori]	4	4	26	2.9701	0.00395808
BGIBMGA009057	putative Mitochondrial 2-oxoglutarate/malate carrier protein [D.plexippus]	2	3	8	2.891	3.5609e-08
BGIBMGA010620	syntaxin 5A [B.mori]	4	4	19	2.85226	9.28424e-07
BGIBMGA001853	ATP synthase [B.mori]	21	92	339	2.77254	0.000875715
BGIBMGA002209	ras-related GTP-binding protein Rab11 [B.mori]	9	10	55	2.76984	0.0183736
BGIBMGA012505	hypothetical protein KGM_21296 [D.plexippus]	6	7	30	2.67382	4.5932e-07
BGIBMGA006158	prohibitin protein WPH [B.mori]	9	11	51	2.61246	0.023929
BGIBMGA014129	peroxisomal membrane anchor protein [B.mori]	2	2	8	2.54631	0.0299402
BGIBMGA006789	hypothetical protein KGM_22518 [D.plexippus]	7	10	58	2.51584	5.88418e-15
BGIBMGA008209	eukaryotic translation initiation factor 3 subunit F [B.mori]	4	5	33	2.46941	0.00291766
BGIBMGA007571	GI13558 [D.mojavensis]	2	2	3	2.44573	0.0288664
BGIBMGA002005	mitochondrial ADP/ATP carrier protein [D.plexippus]	5	13	64	2.43585	5.46826e-17
BGIBMGA013916	6-phosphogluconolactonase [B.mori]	5	5	25	2.42913	0.0400265
BGIBMGA003608	elongation factor-1 alpha [B.mori]	19	324	2202	2.40079	6.22881e-08
BGIBMGA000062	fumarylacetoacetase [B.mori]	5	5	13	2.32361	0.0317224
BGIBMGA006344	similar to CG10527 [Papilio xuthus]	5	5	25	2.30699	0.00384802
BGIBMGA010000	small glutamine-rich tetratricopeptide containing protein [P.xuthus]	4	4	21	2.28544	0.0149939
BGIBMGA004394	low molecular 30 kDa lipoprotein PBMHP-6 precursor [B.mori]	3	3	11	2.2332	0.0120538
gi_158631166	ADP/ATP translocase [B.mori]	15	72	283	2.14482	6.17685e-17
BGIBMGA011870	NADH-ubiquinone reductase [B.mori]	3	3	23	2.11744	0.0437153
BGIBMGA011791	putative 4-nitrophenylphosphatase [D.plexippus]	5	5	19	2.11244	0.0459357
gi_17136324	ribosomal protein S3 [D.melanogaster]	4	4	9	2.09742	1.41004e-12
gi_148298679	signal recognition particle receptor beta subunit [B.mori]	7	10	53	2.07988	0.000477595
gi_17737290	ribosomal protein S6_ isoform B [D.melanogaster]	3	4	10	1.88541	0.0472646
BGIBMGA014201	Aldehyde dehydrogenase[B.mori]	23	47	286	1.86775	0.00399445
gi_18079273	stress_sensitive B_ isoform A [D.melanogaster]	3	5	20	1.83647	0.000250673
BGIBMGA009821	PREDICTED: actin, cytoplasmic 1-like isoform 4 [M.mulatta]	5	6	12	1.75715	0.0329002
BGIBMGA002265	F-actin bundling protein [B.mori]	2	2	7	1.56416	0.00279042
gi_112983276	60S ribosomal protein L5 [B.mori]	13	51	232	1.24153	8.26395e-12
gi_281371488	translation elongation factor 2 isoform 2 [B.mori]	44	281	1315	1.19451	5.75801e-07
gi_112983322	transitional endoplasmic reticulum ATPase TER94 [B.mori]	25	37	203	0.999398	6.47753e-05
BGIBMGA010725	novel protein	34	42	193	0.845731	0.0243285
BGIBMGA012159	novel protein	9	10	22	0.787352	0.0295634
BGIBMGA012753	Heat shock protein Hsp90[B.mori]	16	36	131	0.746684	0.0273649
gi_17137572	elongation factor 1alpha48D_ isoform A [D.melanogaster]	4	6	9	0.695859	0.0252515
BGIBMGA002626	antennal binding protein precursor [B.mori]	2	2	13	0.541687	0.00220547
gi_289629216	coatomer protein complex subunit alpha [B.mori]	36	44	117	0.494941	0.0450116
gi_114052561	cytosolic malate dehydrogenase [B.mori]	7	10	47	0.319519	0.00410111
gi_17136664	calcium ATPase at 60A_ isoform A [D.melanogaster]	8	9	19	0.287263	0.0260719
gi_24650747	ribosomal protein L4 [D.melanogaster]	2	5	29	0.27162	2.07771e-05
BGIBMGA006603	sarco/endoplasmic reticulum calcium ATPase [B.mori]	9	9	15	0.202782	0.0188356
gi_24585660	CG8665 [D.melanogaster]	2	2	10	0.155626	0.0288063
BGIBMGA010392	hypothetical protein IscW_ISCW007168 [I.scapularis]	2	2	3	0.145708	0.041866
gi_17137560	TER94_ isoform A [D.melanogaster]	12	16	44	0.119941	0.00029317
BGIBMGA009048	novel protein	1	1	1	>5000	0
BGIBMGA013972	novel protein	1	1	1	>5000	0
BGIBMGA007061	novel protein	4	5	24	3281.31	0.579752
BGIBMGA011844	novel protein	23	215	1062	868.686	0.983527
gi_153792203	vesicle amine transport protein [B.mori]	5	5	8	612.67	0.9418
BGIBMGA003337	novel protein	8	24	140	483.441	0.957586
BGIBMGA006986	novel protein	5	44	306	403.175	0.573919
gi_112983980	ribosomal protein S19 [B.mori]	5	22	83	385.625	0.99981
BGIBMGA006641	novel protein	4	7	23	361.829	0.174506
BGIBMGA011618	novel protein	4	4	15	326.069	0.34665
BGIBMGA011776	novel protein	3	6	22	309.681	0.940544
BGIBMGA005451	novel protein	2	4	18	255.711	0.453113
BGIBMGA005687	novel protein	5	6	35	228.287	0.952526
BGIBMGA008955	novel protein	11	27	104	206.587	0.971606
BGIBMGA006866	novel protein	5	6	32	206.075	0.973325
BGIBMGA007778	novel protein	4	6	24	196.328	0.166857
BGIBMGA000064	novel protein	4	6	20	158.682	0.421724
BGIBMGA004175	novel protein	6	8	51	126.07	0.738229
BGIBMGA000107	novel protein	1	2	4	123.765	0.258009
BGIBMGA000066	novel protein	4	23	90	121.169	0.98635
BGIBMGA011785	novel protein	6	8	31	112.108	0.126291
BGIBMGA008847	novel protein	3	8	41	108.996	0.994608
BGIBMGA006658	novel protein	1	1	1	101.628	0.41987
gi_5835236	cytochrome c oxidase subunit II [D.melanogaster]	1	1	2	97.8485	0.107316
BGIBMGA013510	novel protein	2	2	5	94.8645	0.0722108
BGIBMGA000903	novel protein	12	20	75	93.4491	0.99852
gi_114051309	mRNA cap_binding protein eIF4E [B.mori]	3	5	10	88.522	0.859696
BGIBMGA001876	novel protein	9	16	60	86.3431	0.999982
gi_112984000	ribosomal protein S18 [B.mori]	9	71	256	85.4028	0.982345
BGIBMGA012936	novel protein	1	1	2	81.7227	0.438601
BGIBMGA003309	novel protein	13	74	266	79.6218	0.995557
BGIBMGA007988	novel protein	11	16	92	74.5231	0.999243
BGIBMGA009562	novel protein	3	4	13	74.3728	0.661435
BGIBMGA006405	novel protein	5	12	31	73.1764	0.764344
BGIBMGA004038	novel protein	4	6	30	72.0807	0.535853
BGIBMGA000526	novel protein	6	9	35	70.2586	0.886404
BGIBMGA008554	novel protein	4	5	9	67.105	0.369161
BGIBMGA011651	novel protein	2	2	4	65.3936	0.415931
gi_17737405	proteasome 35kD subunit [D.melanogaster]	2	2	4	64.481	0.0927681
BGIBMGA000694	novel protein	5	9	20	63.1888	0.598576
gi_115345341	receptor for activated protein kinase C RACK 1 isoform 1 [B.mori]	16	27	130	62.3274	0.964527
BGIBMGA008477	novel protein	1	1	5	61.7184	0.305167
BGIBMGA010571	novel protein	7	18	80	59.6987	0.38937
gi_24646322	Heat_shock_protein_70Bb [D.melanogaster]	2	2	2	59.3597	0.686643
BGIBMGA006473	novel protein	1	1	1	58.4378	0.384801
gi_289629220	coatomer protein complex subunit delta [B.mori]	11	16	28	54.5505	0.974439
BGIBMGA007083	novel protein	1	1	1	51.6574	0.424878
BGIBMGA000991	novel protein	6	8	24	51.1481	0.980921
BGIBMGA009234	novel protein	7	10	56	50.002	0.253217
BGIBMGA013142	novel protein	3	3	14	48.451	0.464985
gi_17736973	Rab_protein 5_ isoform E [D.melanogaster]	1	2	2	46.0905	0.279587
BGIBMGA009099	novel protein	2	5	13	45.5584	0.264524
BGIBMGA006733	novel protein	1	4	10	43.739	0.524546
BGIBMGA009698	novel protein	6	9	29	42.0393	0.923646
BGIBMGA012075	novel protein	1	1	1	41.3413	0.0112957
BGIBMGA011803	novel protein	3	7	18	39.2203	0.41982
gi_24644950	CG2767_ isoform A [D.melanogaster]	1	3	4	37.0821	0.378427
BGIBMGA005560	novel protein	5	10	45	37.0381	0.99586
BGIBMGA009189	novel protein	4	6	22	36.8313	0.818109
gi_153792009	heterogeneous nuclear ribonucleoprotein A1 [B.mori]	2	5	14	36.5823	0.709777
BGIBMGA006313	novel protein	2	4	27	35.8063	0.275056
BGIBMGA006242	novel protein	1	1	2	35.6068	0.143102
BGIBMGA013998	novel protein	4	4	15	34.6997	0.747545
BGIBMGA004992	novel protein	10	11	62	32.3776	0.829431
BGIBMGA012414	novel protein	5	19	92	32.244	0.964651
BGIBMGA013965	novel protein	6	8	38	32.0494	0.992558
BGIBMGA005115	novel protein	7	18	102	31.1351	0.822624
BGIBMGA014605	novel protein	6	8	17	31.1064	0.382819
BGIBMGA014185	novel protein	2	4	10	30.5691	0.220861
BGIBMGA009671	novel protein	2	2	6	30.3331	0.0636039
BGIBMGA009984	novel protein	1	1	1	30.1817	0.431966
BGIBMGA010120	novel protein	7	10	34	29.7473	0.94075
BGIBMGA002811	novel protein	7	31	109	29.6008	0.857737
gi_112984224	alanine__tRNA ligase_ cytoplasmic [B.mori]	31	60	313	29.3397	0.0939782
gi_112983206	eukaryotic translation initiation factor 5 [B.mori]	9	11	36	27.293	0.997352
BGIBMGA011620	novel protein	7	15	64	27.1204	0.0557969
gi_112982812	ribosomal protein L6 [B.mori]	6	12	58	27.044	0.855533
BGIBMGA007950	novel protein	19	47	240	26.863	0.436292
BGIBMGA001943	novel protein	2	3	9	26.3714	0.255894
BGIBMGA013394	novel protein	2	2	5	25.7694	0.24349
BGIBMGA013233	novel protein	2	2	3	24.7201	0.762194
BGIBMGA001800	novel protein	18	100	369	24.3949	0.538894
BGIBMGA004061	novel protein	8	8	11	24.3905	0.799053
BGIBMGA004060	novel protein	7	10	22	24.3088	0.753458
BGIBMGA000074	novel protein	11	17	84	23.4137	0.988354
BGIBMGA002381	novel protein	27	67	340	23.3411	0.9896
BGIBMGA010673	novel protein	7	8	31	23.0885	0.994391
gi_306518662	phenylalanyl_tRNA synthetase alpha subunit [B.mori]	3	4	8	22.7219	0.819174
gi_114052088	vacuolar ATP synthase subunit E [B.mori]	6	7	32	21.8363	0.34111
BGIBMGA010603	novel protein	1	2	2	21.6323	0.200523
BGIBMGA007720	novel protein	7	7	26	21.3453	0.565604
BGIBMGA002570	novel protein	16	24	120	21.1419	0.992981
gi_17647425	fibrillarin [D.melanogaster]	4	5	12	21.0275	0.985249
BGIBMGA003924	novel protein	5	6	25	20.7517	0.396025
BGIBMGA002424	novel protein	1	1	1	20.5773	0.415715
BGIBMGA013141	novel protein	2	2	3	20.0804	0.5707
gi_24650981	phosphoglyceromutase_ isoform A [D.melanogaster]	1	1	2	19.9594	0.515057
BGIBMGA010245	novel protein	6	10	27	19.9451	0.994402
BGIBMGA008223	novel protein	1	1	1	19.7728	0.205555
BGIBMGA007944	novel protein	1	1	3	19.4052	0.558638
BGIBMGA005590	novel protein	3	6	11	18.9706	0.988255
BGIBMGA009021	novel protein	5	5	9	18.1869	0.392032
BGIBMGA013168	novel protein	4	4	13	17.859	0.203284
gi_304307733	elongator complex protein 1 [B.mori]	8	9	31	16.5251	0.277082
gi_114052002	U2 small nuclear ribonucleoprotein A_ [B.mori]	2	2	8	16.3615	0.211009
BGIBMGA013396	novel protein	2	3	11	16.3038	0.706186
BGIBMGA010361	novel protein	5	5	12	16.1993	0.380921
BGIBMGA007862	novel protein	1	1	1	15.6305	0.411267
BGIBMGA008066	novel protein	12	13	33	15.6127	0.619431
BGIBMGA004029	novel protein	1	2	7	15.4852	0.360959
BGIBMGA012985	novel protein	1	1	1	15.3935	0.42136
BGIBMGA013364	novel protein	1	2	4	15.2975	0.484232
BGIBMGA001751	novel protein	2	2	3	15.0626	0.692415
BGIBMGA001124	novel protein	5	6	13	14.9504	0.962518
BGIBMGA009685	novel protein	13	19	64	14.9461	0.999803
BGIBMGA009978	novel protein	4	6	23	14.7956	0.237352
gi_17737907	ribosomal protein L3_ isoform A [D.melanogaster]	4	9	53	14.7394	0.682969
BGIBMGA004267	novel protein	1	2	7	14.6487	0.40359
BGIBMGA010258	novel protein	2	2	3	14.6463	0.553849
BGIBMGA007386	novel protein	3	4	6	14.6325	0.237727
BGIBMGA000603	novel protein	3	5	9	14.4792	0.570124
gi_114053141	exuperantia [B.mori]	12	22	135	14.3131	0.929893
BGIBMGA007879	novel protein	5	6	16	14.2997	0.990142
gi_24645119	CG8036_ isoform D [D.melanogaster]	3	7	18	14.2175	0.577822
BGIBMGA003515	novel protein	1	1	1	14.1721	0.442295
BGIBMGA011936	novel protein	5	6	35	14.0593	0.538706
gi_114050833	transketolase [B.mori]	11	16	77	13.8718	0.971389
BGIBMGA010199	novel protein	1	1	2	13.8392	0.51207
BGIBMGA002493	novel protein	17	28	119	13.8355	0.585841
BGIBMGA013898	novel protein	4	5	31	13.7647	0.543411
BGIBMGA006359	novel protein	3	3	3	13.7353	0.454571
BGIBMGA007586	novel protein	25	49	265	13.7101	0.844603
BGIBMGA014589	novel protein	2	2	6	13.5955	0.41005
BGIBMGA010790	novel protein	4	4	26	13.5367	0.289619
gi_19920834	CG9547 [D.melanogaster]	1	1	1	13.4801	0.354422
BGIBMGA000898	novel protein	1	1	5	13.2714	0.509332
BGIBMGA004059	novel protein	4	7	26	13.231	0.838117
BGIBMGA003669	novel protein	10	15	55	13.0742	0.999993
BGIBMGA008312	novel protein	6	10	64	13.0368	0.707715
BGIBMGA005130	novel protein	1	1	1	12.4979	0.378904
BGIBMGA005587	novel protein	2	3	5	12.3985	0.682759
gi_164448672	fibroin heavy chain precursor [B.mori]	2	3	21	12.0816	0.775656
gi_24647085	tropomyosin 1_ isoform C [D.melanogaster]	2	2	2	11.8466	0.307544
BGIBMGA007110	novel protein	1	1	1	11.6305	0.680094
BGIBMGA003671	novel protein	3	7	24	11.5266	0.893768
BGIBMGA012122	novel protein	9	12	49	11.47	0.79278
BGIBMGA006360	novel protein	3	4	5	11.428	0.927766
BGIBMGA002401	novel protein	6	7	23	11.3024	0.800704
BGIBMGA009107	novel protein	6	9	34	11.2995	0.0916953
BGIBMGA009419	novel protein	2	2	4	11.1832	0.764264
BGIBMGA004661	novel protein	1	1	2	11.1492	0.514533
BGIBMGA003842	novel protein	1	1	1	11.0129	0.392851
BGIBMGA014220	novel protein	1	1	2	10.9968	0.533816
BGIBMGA008442	novel protein	7	9	22	10.8638	0.581883
gi_114051399	RAN binding protein [B.mori]	3	6	18	10.6833	0.450648
BGIBMGA005519	novel protein	1	1	1	10.6062	0.409059
BGIBMGA013513	novel protein	2	2	3	10.5873	0.549381
BGIBMGA009103	novel protein	3	3	5	10.5047	0.954802
BGIBMGA013567	novel protein	14	41	261	10.4649	0.966066
BGIBMGA013811	novel protein	1	1	5	10.1832	0.443755
gi_24649446	proteasome 26S subunit subunit 4 ATPase [D.melanogaster]	4	4	5	10.1742	0.836152
BGIBMGA003361	novel protein	23	42	228	9.97897	0.973915
BGIBMGA003910	novel protein	5	6	18	9.81631	0.572336
BGIBMGA006779	novel protein	4	4	13	9.65271	0.200005
BGIBMGA012030	novel protein	9	26	63	9.5802	0.996332
BGIBMGA013112	novel protein	9	10	28	9.573	0.616942
BGIBMGA000106	novel protein	1	1	2	9.49683	0.548149
BGIBMGA004932	novel protein	27	40	189	9.44179	0.331283
gi_153792609	tropomyosin_2 isoform 4 [B.mori]	10	12	24	9.42884	0.680735
BGIBMGA007493	novel protein	1	1	1	9.37864	0.257727
BGIBMGA007241	novel protein	3	3	4	9.30886	0.174216
BGIBMGA006257	novel protein	1	1	1	9.27289	0.462737
BGIBMGA004911	novel protein	1	4	9	9.26487	0.156259
BGIBMGA009139	novel protein	3	6	19	9.21254	0.789497
gi_24665973	CG7564 [D.melanogaster]	1	1	2	9.1785	0.496867
BGIBMGA011491	novel protein	2	3	8	9.0239	0.544458
BGIBMGA001540	novel protein	1	1	1	9.01791	0.257015
BGIBMGA000715	novel protein	7	10	47	8.90275	0.967098
BGIBMGA009771	novel protein	2	4	25	8.70535	0.768542
BGIBMGA012515	novel protein	2	2	3	8.67766	0.694064
BGIBMGA005116	novel protein	13	16	64	8.6697	0.444397
BGIBMGA002594	novel protein	5	12	62	8.56792	0.066934
BGIBMGA008284	novel protein	6	7	22	8.5189	0.958705
BGIBMGA012839	novel protein	4	7	39	8.47095	0.234033
BGIBMGA006243	novel protein	2	2	2	8.46438	0.661067
gi_24640670	moesin_ isoform D [D.melanogaster]	1	1	2	8.44081	0.644685
BGIBMGA003225	novel protein	2	2	3	8.43308	0.312676
BGIBMGA013631	novel protein	7	9	47	8.3274	0.997064
BGIBMGA007315	novel protein	9	10	36	8.24622	0.573253
BGIBMGA002504	novel protein	5	12	67	8.23414	0.637439
BGIBMGA012083	novel protein	7	7	27	8.17392	0.962621
BGIBMGA000154	novel protein	6	8	16	7.90422	0.604925
BGIBMGA012665	novel protein	5	5	19	7.74118	0.36753
BGIBMGA003319	novel protein	9	11	44	7.68535	0.996555
BGIBMGA010016	novel protein	4	4	25	7.65754	0.815269
BGIBMGA004309	novel protein	8	11	44	7.62189	0.62722
gi_17137738	Rpt1 [D.melanogaster]	7	10	30	7.60965	0.997518
BGIBMGA002981	novel protein	2	3	13	7.59563	0.754308
BGIBMGA005425	novel protein	2	3	5	7.5545	0.697442
BGIBMGA013063	novel protein	10	12	71	7.54225	0.405883
BGIBMGA001461	novel protein	6	7	29	7.51049	0.927354
BGIBMGA010015	novel protein	4	7	13	7.50647	0.857146
BGIBMGA013693	novel protein	2	2	2	7.45974	0.452639
BGIBMGA013070	novel protein	4	4	10	7.43918	0.973776
BGIBMGA012168	novel protein	2	4	14	7.41858	0.99951
BGIBMGA008903	novel protein	1	1	4	7.40874	0.598761
BGIBMGA005530	novel protein	1	1	2	7.31057	0.549237
BGIBMGA012687	novel protein	7	19	93	7.28821	0.807421
BGIBMGA013493	novel protein	1	1	4	7.27697	0.661574
BGIBMGA006171	novel protein	17	18	70	7.23104	0.292111
gi_24642151	CG6227 [D.melanogaster]	1	1	1	7.22391	0.350423
BGIBMGA000661	novel protein	2	3	4	7.21906	0.37969
BGIBMGA002462	novel protein	14	16	94	7.21141	0.150585
gi_24662918	CG10361 [D.melanogaster]	1	2	3	7.16167	0.622776
BGIBMGA007935	novel protein	10	11	38	7.16115	0.999322
BGIBMGA006749	novel protein	12	19	55	7.11424	0.986557
BGIBMGA001137	novel protein	1	1	1	7.10838	0.377673
BGIBMGA007359	novel protein	1	2	4	7.10686	0.540615
BGIBMGA002572	novel protein	6	15	73	7.10112	0.998277
BGIBMGA007332	novel protein	10	13	42	7.0949	0.999973
BGIBMGA003516	novel protein	3	3	6	7.08685	0.851707
gi_306518638	putative acetyl transferase [B.mori]	10	11	47	7.0759	0.997645
BGIBMGA014208	novel protein	3	4	18	7.07423	0.895735
BGIBMGA007159	novel protein	1	1	2	6.9661	0.48146
gi_24668440	CG7442 [D.melanogaster]	1	1	2	6.94886	0.384473
gi_24644479	Rm62_ isoform A [D.melanogaster]	4	4	8	6.93022	0.404195
gi_164448666	carboxypeptidase inhibitor precursor [B.mori]	3	3	24	6.88604	0.822338
BGIBMGA004834	novel protein	1	1	4	6.81932	0.615099
BGIBMGA003607	novel protein	1	1	1	6.81605	0.519849
BGIBMGA014190	novel protein	4	4	6	6.80834	0.992755
BGIBMGA007248	novel protein	5	6	25	6.79197	0.935051
gi_281363753	hu li tai shao_ isoform I [D.melanogaster]	1	1	1	6.76512	0.453973
BGIBMGA001558	novel protein	26	33	125	6.70766	0.246567
BGIBMGA001437	novel protein	3	3	10	6.69832	0.800305
BGIBMGA007092	novel protein	4	4	7	6.59504	0.759082
BGIBMGA007642	novel protein	5	5	12	6.58718	0.964054
BGIBMGA000672	novel protein	10	13	68	6.58256	0.999124
BGIBMGA004501	novel protein	3	4	9	6.5798	0.673092
BGIBMGA009563	novel protein	6	8	20	6.55201	0.453818
BGIBMGA008117	novel protein	2	2	4	6.45747	0.448563
gi_17136570	ribosomal protein L40 [D.melanogaster]	3	3	18	6.42885	0.798405
BGIBMGA004221	novel protein	4	4	7	6.42056	0.46371
BGIBMGA004395	novel protein	2	2	7	6.4099	0.146458
BGIBMGA004375	novel protein	13	84	381	6.38916	0.991374
BGIBMGA005175	novel protein	1	1	5	6.36578	0.416819
BGIBMGA014059	novel protein	5	6	20	6.35406	0.950875
BGIBMGA007349	novel protein	16	25	98	6.34191	0.999334
gi_114050729	vacuolar ATPase subunit C [B.mori]	9	10	47	6.33125	0.998513
BGIBMGA010958	novel protein	1	1	1	6.31923	0.463929
BGIBMGA008865	novel protein	8	33	108	6.30733	0.93569
gi_28574668	Rtnl1_ isoform A [D.melanogaster]	1	1	8	6.29439	0.564226
BGIBMGA001549	novel protein	3	3	7	6.29215	0.85063
BGIBMGA012903	novel protein	3	4	8	6.21958	0.762442
BGIBMGA004898	novel protein	7	10	45	6.21541	0.187512
BGIBMGA002809	novel protein	1	1	1	6.19398	0.168188
BGIBMGA011297	novel protein	7	8	21	6.17091	0.960534
gi_19922364	Cysteinyl_tRNA synthetase [D.melanogaster]	1	1	2	6.10751	0.41639
BGIBMGA011342	novel protein	1	1	3	6.07865	0.0699404
BGIBMGA014579	novel protein	2	7	10	5.98173	0.872572
BGIBMGA011920	novel protein	1	2	12	5.97526	0.801226
BGIBMGA003643	novel protein	1	1	4	5.93733	0.539718
BGIBMGA007647	novel protein	2	2	2	5.93635	0.554545
gi_28573187	phosphoribosylamidotransferase [D.melanogaster]	2	2	2	5.93635	0.554545
BGIBMGA005922	novel protein	1	1	2	5.91955	0.422664
BGIBMGA008925	novel protein	2	2	6	5.81118	0.0967034
BGIBMGA002219	novel protein	1	3	7	5.79101	0.290522
BGIBMGA002544	novel protein	4	5	20	5.76515	0.759173
BGIBMGA012888	novel protein	2	2	4	5.7624	0.306791
gi_24583156	bekka [D.melanogaster]	1	1	1	5.7589	0.269255
gi_114052645	thymosin isoform 1 [B.mori]	5	5	19	5.75853	0.284514
BGIBMGA008920	novel protein	1	1	1	5.74973	0.476199
BGIBMGA012860	novel protein	3	3	12	5.74222	0.158833
BGIBMGA009000	novel protein	2	3	4	5.62834	0.639733
BGIBMGA009012	novel protein	3	3	10	5.62241	0.743031
BGIBMGA010906	novel protein	4	5	25	5.59317	0.729429
BGIBMGA011272	novel protein	3	3	8	5.57727	0.220743
BGIBMGA007192	novel protein	1	1	1	5.55647	0.235351
BGIBMGA013449	novel protein	4	40	105	5.55188	0.671143
BGIBMGA003892	novel protein	18	27	118	5.54192	0.224564
gi_255652879	DnaJ (Hsp40) homolog 1 [B.mori]	6	6	14	5.52969	0.991336
BGIBMGA011792	novel protein	4	4	7	5.52057	0.271825
gi_148298746	glucose_6_phosphate isomerase [B.mori]	12	17	73	5.47753	0.996251
BGIBMGA006975	novel protein	1	1	7	5.44072	0.62883
BGIBMGA011589	novel protein	2	2	13	5.43648	0.858295
BGIBMGA014121	novel protein	1	1	2	5.43042	0.580464
BGIBMGA011438	novel protein	3	3	11	5.42647	0.87276
gi_148298673	mitochondrial ATP synthase coupling factor 6 [B.mori]	2	2	2	5.4153	0.294815
BGIBMGA009397	novel protein	1	1	2	5.37545	0.306131
gi_8572567	NADH dehydrogenase subunit 6 [B.mori]	2	2	7	5.36011	0.69016
BGIBMGA013351	novel protein	1	3	4	5.32715	0.878781
BGIBMGA004985	novel protein	2	2	2	5.32634	0.374627
BGIBMGA004965	novel protein	19	45	261	5.32516	0.902916
gi_112983505	ribosomal protein S10 [B.mori]	7	63	219	5.32469	0.967165
BGIBMGA004196	novel protein	2	3	17	5.31129	0.565479
BGIBMGA008210	novel protein	1	1	3	5.31081	0.26568
BGIBMGA005392	novel protein	4	4	30	5.29489	0.604723
BGIBMGA000679	novel protein	1	1	1	5.25985	0.367642
BGIBMGA011746	novel protein	13	13	30	5.22231	0.967899
gi_148298754	putative farnesoic acid O_methyl transferase [B.mori]	5	8	61	5.21523	0.386357
BGIBMGA002012	novel protein	6	7	19	5.17356	0.492039
gi_114052677	phosphoserine aminotransferase 1 [B.mori]	17	49	283	5.14947	1
BGIBMGA007131	novel protein	4	4	16	5.13642	0.925753
BGIBMGA011822	novel protein	3	3	7	5.12613	0.396063
BGIBMGA012670	novel protein	3	4	14	5.11929	0.918227
BGIBMGA006022	novel protein	12	18	80	5.11691	0.999768
BGIBMGA008899	novel protein	1	1	1	5.11388	0.476716
BGIBMGA003726	novel protein	8	60	222	5.09232	0.857563
BGIBMGA008011	novel protein	1	1	2	5.08147	0.401636
BGIBMGA006289	novel protein	1	1	2	5.0762	0.592476
BGIBMGA003991	novel protein	2	2	4	5.06003	0.828814
BGIBMGA008779	novel protein	6	7	18	5.05676	0.677297
BGIBMGA010569	novel protein	1	1	2	5.0294	0.165581
BGIBMGA012762	novel protein	2	3	11	5.02896	0.395634
BGIBMGA011029	novel protein	7	9	26	5.01044	0.982898
gi_112983936	nonclathrin coat protein gamma1_COP [B.mori]	21	34	128	4.98271	0.339035
BGIBMGA000937	novel protein	2	2	9	4.95923	0.768427
BGIBMGA003833	novel protein	8	10	29	4.89698	0.984717
BGIBMGA004140	novel protein	2	2	3	4.87549	0.674282
gi_134948671	small nuclear ribonucleoprotein sm d2 [B.mori]	4	5	18	4.87167	0.986397
BGIBMGA010827	novel protein	1	1	10	4.80132	0.352571
BGIBMGA012632	novel protein	1	2	6	4.79797	0.451256
BGIBMGA000683	novel protein	2	2	2	4.79441	0.633931
gi_17647249	Cdc42_ isoform A [D.melanogaster]	1	1	1	4.79192	0.53144
BGIBMGA000425	novel protein	1	1	1	4.7878	0.422767
BGIBMGA010577	novel protein	2	2	5	4.7532	0.725985
BGIBMGA006122	novel protein	1	2	5	4.75137	0.948075
BGIBMGA012032	novel protein	1	1	1	4.74993	0.495229
BGIBMGA009170	novel protein	1	1	2	4.74221	0.58848
BGIBMGA010884	novel protein	1	1	2	4.739	0.327658
BGIBMGA001218	novel protein	16	25	110	4.73879	0.670705
BGIBMGA012659	novel protein	5	5	16	4.73323	0.99725
BGIBMGA000922	novel protein	1	1	3	4.72645	0.656634
BGIBMGA000943	novel protein	2	4	22	4.69441	0.927575
BGIBMGA007681	novel protein	12	14	38	4.66699	0.997478
BGIBMGA005828	novel protein	1	1	3	4.64201	0.607449
BGIBMGA001136	novel protein	3	3	15	4.63463	0.78795
gi_24580972	glutamate oxaloacetate transaminase 2_ isoform B [D.melanogaster]	1	1	1	4.63194	0.372702
gi_18859793	transport and golgi organization 4 [D.melanogaster]	1	1	2	4.62833	0.43892
BGIBMGA010930	novel protein	3	6	12	4.60846	0.926628
BGIBMGA003397	novel protein	11	100	433	4.60705	0.995012
BGIBMGA002713	novel protein	2	3	5	4.58888	0.663067
gi_114052797	signal peptidase 18 kDa subunit [B.mori]	5	6	28	4.58333	0.917972
BGIBMGA000484	novel protein	18	22	62	4.54081	0.274673
BGIBMGA000959	novel protein	3	34	165	4.53167	1
BGIBMGA013473	novel protein	2	2	3	4.52156	0.635296
gi_148298671	signal peptidase complex subunit 3 [B.mori]	4	4	11	4.51992	0.87835
BGIBMGA004265	novel protein	1	1	3	4.51817	0.625475
BGIBMGA002078	novel protein	2	2	4	4.5159	0.446664
BGIBMGA005769	novel protein	1	1	1	4.49747	0.401313
BGIBMGA000399	novel protein	1	1	3	4.48326	0.570775
BGIBMGA009044	novel protein	1	1	1	4.46926	0.366768
BGIBMGA002619	novel protein	1	1	1	4.46135	0.454577
BGIBMGA001195	novel protein	1	1	1	4.44256	0.47343
BGIBMGA001898	novel protein	1	1	1	4.43575	0.145355
BGIBMGA010223	novel protein	1	1	1	4.426	0.16926
gi_21357663	ribosomal protein S10a [D.melanogaster]	1	3	6	4.42331	0.94727
BGIBMGA000057	novel protein	1	1	2	4.42003	0.552086
BGIBMGA002188	novel protein	2	3	9	4.41863	0.48141
BGIBMGA005249	novel protein	6	8	42	4.41713	0.983621
BGIBMGA003048	novel protein	3	4	8	4.38651	0.684358
BGIBMGA000664	novel protein	1	1	8	4.38585	0.00447312
gi_148298800	enolase [B.mori]	7	13	21	4.37288	0.999992
BGIBMGA001252	novel protein	1	1	1	4.36377	0.0287418
BGIBMGA006178	novel protein	4	6	11	4.35394	0.84363
BGIBMGA013413	novel protein	13	26	174	4.31931	0.958426
BGIBMGA007173	novel protein	2	3	8	4.31354	0.999967
BGIBMGA003197	novel protein	5	42	69	4.29468	0.974392
BGIBMGA003480	novel protein	2	4	10	4.28879	0.30163
BGIBMGA001584	novel protein	1	1	2	4.2873	0.506654
gi_221329764	ionotropic receptor 7d [D.melanogaster]	1	1	1	4.25926	0.432371
BGIBMGA002640	novel protein	1	2	7	4.25278	0.339571
gi_114051015	haloacid dehalogenase [B.mori]	3	3	14	4.23451	0.442498
BGIBMGA000114	novel protein	1	1	1	4.23052	0.0162812
BGIBMGA000819	novel protein	3	4	14	4.22397	0.509176
BGIBMGA007090	novel protein	1	1	1	4.2162	0.523544
BGIBMGA004933	novel protein	1	1	10	4.21486	0.367899
BGIBMGA009983	novel protein	3	4	8	4.2141	0.965384
gi_17738165	heat shock protein 68 [D.melanogaster]	3	16	53	4.20012	0.281509
gi_24646318	Heat_shock_protein_70Ba [D.melanogaster]	3	6	12	4.20012	0.281509
BGIBMGA004159	novel protein	1	1	1	4.1898	0.499992
BGIBMGA005161	novel protein	2	2	3	4.18668	0.261441
BGIBMGA005023	novel protein	1	1	1	4.18565	0.748312
BGIBMGA011282	novel protein	7	49	174	4.1838	0.997514
BGIBMGA007303	novel protein	1	1	6	4.1737	0.00765282
BGIBMGA008199	novel protein	2	2	7	4.16004	0.925243
BGIBMGA001509	novel protein	1	1	1	4.14698	0.0283242
BGIBMGA010130	novel protein	9	10	58	4.14368	0.694062
BGIBMGA014221	novel protein	1	2	8	4.13795	0.00624208
BGIBMGA010644	novel protein	13	14	45	4.13273	0.334479
BGIBMGA005928	novel protein	3	5	11	4.13168	0.568374
BGIBMGA005793	novel protein	4	9	30	4.12954	0.980813
BGIBMGA007948	novel protein	53	71	251	4.11823	0.0532648
gi_195546808	Elav protein [B.mori]	1	1	1	4.11803	0.336696
BGIBMGA010974	novel protein	2	2	3	4.10187	0.489245
BGIBMGA013964	novel protein	1	1	1	4.09858	0.818236
BGIBMGA006047	novel protein	2	4	25	4.06149	0.876433
BGIBMGA002605	novel protein	1	1	1	4.0594	0.510589
BGIBMGA010124	novel protein	1	1	1	4.05916	0.525483
BGIBMGA003609	novel protein	1	1	8	4.04443	0.697988
BGIBMGA000897	novel protein	6	7	16	4.03079	0.891243
gi_24585122	CG10702_ isoform A [D.melanogaster]	1	1	1	4.02589	0.487963
BGIBMGA006318	novel protein	1	1	7	4.01178	0.000132345
BGIBMGA009731	novel protein	2	2	5	4.00975	0.647429
BGIBMGA013930	novel protein	2	2	4	4.00957	0.754761
BGIBMGA001043	novel protein	6	34	142	4.00813	0.999913
BGIBMGA006859	novel protein	2	2	7	4.00327	0.389248
BGIBMGA001953	novel protein	1	1	1	3.98306	0.516331
BGIBMGA000029	novel protein	3	7	23	3.982	0.718094
gi_17738047	vibrator [D.melanogaster]	1	3	14	3.9791	1.65034e-07
BGIBMGA003386	novel protein	1	1	1	3.96891	0.326743
BGIBMGA011132	novel protein	2	2	8	3.96108	0.83626
gi_148298697	eukaryotic initiation factor 5C [B.mori]	10	12	49	3.95676	0.99943
BGIBMGA012295	novel protein	2	2	2	3.95676	0.852645
BGIBMGA005931	novel protein	1	1	1	3.95402	0.513101
BGIBMGA000619	novel protein	2	2	3	3.9447	0.177314
gi_45552677	CG34415_ isoform D [D.melanogaster]	1	1	3	3.93595	0.510094
gi_24581203	CG9961 [D.melanogaster]	2	2	3	3.93508	0.87137
BGIBMGA001707	novel protein	4	8	60	3.93312	0.895521
BGIBMGA004614	novel protein	5	17	79	3.93133	0.922444
BGIBMGA004331	novel protein	2	3	10	3.92723	0.932443
BGIBMGA012152	novel protein	2	2	8	3.92704	0.339272
BGIBMGA007977	novel protein	4	5	16	3.91882	0.982595
BGIBMGA006154	novel protein	1	1	1	3.91724	0.370898
BGIBMGA012982	novel protein	1	1	2	3.90995	0.336511
BGIBMGA009726	novel protein	1	1	7	3.90502	0.201155
gi_21356589	CG11899 [D.melanogaster]	1	3	6	3.89696	0.962611
BGIBMGA013029	novel protein	2	2	6	3.88474	0.849495
BGIBMGA003815	novel protein	5	5	14	3.87366	0.952268
gi_24645031	eIF4AIII [D.melanogaster]	7	11	36	3.86512	0.999583
BGIBMGA002918	novel protein	1	1	5	3.85181	0.427689
BGIBMGA010845	novel protein	6	9	44	3.85073	0.992273
BGIBMGA013322	novel protein	1	1	1	3.83921	0.403828
BGIBMGA003762	novel protein	2	2	10	3.83361	0.521758
BGIBMGA011887	novel protein	5	5	18	3.83185	0.973398
BGIBMGA006835	novel protein	10	17	91	3.82979	0.683134
gi_153792659	actin_depolymerizing factor 1 [B.mori]	8	19	116	3.8205	0.999854
BGIBMGA001238	novel protein	11	11	38	3.80721	0.95216
BGIBMGA014335	novel protein	1	1	1	3.78476	0.509327
gi_148298873	putative signal recognition particle 54 kDa protein [B.mori]	12	16	55	3.78312	0.999388
gi_17737967	heat shock protein cognate 4_ isoform A [D.melanogaster]	12	32	123	3.77658	0.971703
gi_17137396	receptor of activated protein kinase C 1 [D.melanogaster]	2	3	6	3.77325	0.803814
BGIBMGA010151	novel protein	3	3	4	3.75362	0.349067
gi_161077459	CG13568_ isoform F [D.melanogaster]	1	1	1	3.73854	0.446894
BGIBMGA004009	novel protein	2	2	4	3.72468	0.673014
BGIBMGA013713	novel protein	1	2	16	3.72046	0.626391
BGIBMGA011771	novel protein	3	3	8	3.71469	0.348333
BGIBMGA004822	novel protein	9	13	37	3.71036	0.88624
gi_114053253	6_phosphogluconate dehydrogenase [B.mori]	8	8	14	3.70296	0.994248
BGIBMGA007824	novel protein	8	9	53	3.70072	0.999985
BGIBMGA009612	novel protein	2	2	4	3.69901	0.911727
gi_28574962	CG10077_ isoform A [D.melanogaster]	4	4	12	3.69597	0.753837
BGIBMGA006754	novel protein	2	2	3	3.68815	0.898527
BGIBMGA001070	novel protein	2	2	9	3.68444	0.798905
gi_112982657	polymerase delta interacting protein 3 [B.mori]	1	1	7	3.67819	0.832665
BGIBMGA011710	novel protein	13	16	84	3.67563	0.907515
BGIBMGA006541	novel protein	1	1	3	3.66589	0.67043
BGIBMGA009186	novel protein	1	1	11	3.64703	0.719448
BGIBMGA003398	novel protein	2	2	5	3.63127	0.467497
BGIBMGA004165	novel protein	5	5	11	3.627	0.958846
BGIBMGA001593	novel protein	2	2	4	3.61076	0.598549
BGIBMGA010642	novel protein	7	7	23	3.60727	0.916326
BGIBMGA014136	novel protein	8	11	32	3.60268	0.992332
BGIBMGA009647	novel protein	7	83	288	3.59587	0.55152
BGIBMGA007263	novel protein	3	3	19	3.59177	0.982968
BGIBMGA012651	novel protein	1	1	2	3.57195	0.455139
BGIBMGA006631	novel protein	1	1	1	3.57059	0.36489
gi_148298787	ubiquitin and ribosomal protein S27a [B.mori]	2	2	3	3.56698	0.926393
gi_17136574	ribosomal protein S27A [D.melanogaster]	3	5	10	3.54762	0.946162
gi_24650776	beta_Tubulin at 97EF_ isoform A [D.melanogaster]	5	8	58	3.54745	0.774884
BGIBMGA005449	novel protein	5	5	10	3.53919	0.553548
BGIBMGA013792	novel protein	9	23	73	3.53688	0.999757
gi_309384283	kinesin heavy chain [B.mori]	16	20	59	3.52979	0.653589
BGIBMGA006588	novel protein	6	7	19	3.51779	0.582536
BGIBMGA006809	novel protein	19	26	92	3.50939	0.818194
BGIBMGA003130	novel protein	1	1	1	3.50143	0.459803
BGIBMGA006825	novel protein	1	1	4	3.49879	0.600578
BGIBMGA010978	novel protein	1	1	4	3.48082	0.612565
BGIBMGA001643	novel protein	2	3	10	3.4794	0.428741
gi_24585645	gustatory receptor 39a_ isoform D [D.melanogaster]	1	1	1	3.47803	0.371236
BGIBMGA005126	novel protein	1	1	2	3.47737	0.0727148
BGIBMGA012133	novel protein	1	1	2	3.47199	0.0992632
gi_112982822	phosphoglyceromutase [B.mori]	9	12	53	3.47068	0.970889
BGIBMGA001733	novel protein	1	1	8	3.46884	0.244752
gi_17136264	annexin IX_ isoform B [D.melanogaster]	2	2	3	3.46173	0.277654
BGIBMGA003829	novel protein	4	4	15	3.46164	0.929879
BGIBMGA013116	novel protein	11	13	44	3.46053	0.796364
BGIBMGA000793	novel protein	1	2	7	3.45298	0.945228
BGIBMGA012981	novel protein	3	3	17	3.44081	0.953122
gi_17737941	heat shock protein cognate 2 [D.melanogaster]	3	14	55	3.43736	0.482986
BGIBMGA012298	novel protein	7	8	17	3.43673	0.996982
gi_17136986	twinstar [D.melanogaster]	4	10	61	3.43302	0.99893
BGIBMGA012485	novel protein	1	1	1	3.4302	0.510845
BGIBMGA001015	novel protein	1	1	2	3.42635	0.450848
BGIBMGA003259	novel protein	11	14	49	3.42045	0.315104
BGIBMGA003066	novel protein	2	2	3	3.4203	0.678218
BGIBMGA010684	novel protein	3	4	12	3.41041	0.838985
BGIBMGA007416	novel protein	4	6	15	3.39711	0.195388
BGIBMGA003206	novel protein	1	1	2	3.39395	0.652422
gi_45551900	tropomyosin 1_ isoform E [D.melanogaster]	3	3	3	3.39357	0.773934
BGIBMGA008921	novel protein	11	30	152	3.39168	0.486093
BGIBMGA002405	novel protein	6	64	318	3.39115	0.912506
BGIBMGA007490	novel protein	10	14	60	3.37508	0.992418
BGIBMGA010487	novel protein	1	5	8	3.37481	0.941596
gi_221513692	Qm_ isoform C [D.melanogaster]	3	19	31	3.37327	0.624186
BGIBMGA000714	novel protein	3	4	12	3.36972	0.945539
gi_156546886	ornithine decarboxylase antizyme 1 [B.mori]	1	1	4	3.36698	0.333118
BGIBMGA007334	novel protein	1	1	2	3.36337	0.503556
BGIBMGA005250	novel protein	4	5	16	3.34896	0.63916
BGIBMGA012125	novel protein	3	3	5	3.34877	0.578165
gi_17137392	vacuolar H[_] ATPase 44kD C subunit_ isoform A [D.melanogaster]	3	3	6	3.34326	0.913354
BGIBMGA011922	novel protein	10	15	76	3.33159	0.999987
BGIBMGA005503	novel protein	2	2	4	3.3287	0.889386
BGIBMGA005439	novel protein	1	1	2	3.31761	0.459417
BGIBMGA001974	novel protein	1	1	1	3.31536	0.459719
BGIBMGA002759	novel protein	4	5	9	3.31184	0.446489
BGIBMGA009571	novel protein	2	2	14	3.30912	0.562591
gi_114051930	prefoldin beta subunit [B.mori]	1	1	5	3.30679	0.760902
BGIBMGA011581	novel protein	2	2	11	3.29608	0.808979
BGIBMGA007590	novel protein	1	1	1	3.29581	0.451893
BGIBMGA000926	novel protein	10	12	38	3.28306	0.998803
BGIBMGA001186	novel protein	2	3	19	3.27875	0.732306
gi_112982713	copper chaperone [B.mori]	1	1	3	3.27059	0.458231
BGIBMGA010723	novel protein	2	2	5	3.26611	0.983816
gi_21357623	small ribonucleoprotein particle protein SmD2 [D.melanogaster]	2	2	3	3.26611	0.983816
BGIBMGA004488	novel protein	2	4	14	3.26152	0.874199
BGIBMGA002375	novel protein	6	7	21	3.26138	0.456575
BGIBMGA001182	novel protein	2	2	5	3.25529	0.208423
BGIBMGA007477	novel protein	9	17	44	3.23928	0.87976
BGIBMGA002559	novel protein	3	5	24	3.23892	0.760529
BGIBMGA003759	novel protein	4	6	10	3.23528	0.840811
BGIBMGA004881	novel protein	9	11	36	3.22246	0.76835
BGIBMGA012356	novel protein	2	2	8	3.22201	0.743923
BGIBMGA001035	novel protein	10	13	76	3.22063	0.999998
BGIBMGA007889	novel protein	8	9	36	3.22042	0.972727
BGIBMGA007222	novel protein	1	1	8	3.21843	0.340022
BGIBMGA013623	novel protein	1	1	12	3.21816	0.849382
BGIBMGA013532	novel protein	2	3	12	3.21349	0.914289
BGIBMGA009987	novel protein	2	2	2	3.21183	0.82988
BGIBMGA009696	novel protein	1	1	3	3.21092	0.238117
BGIBMGA005464	novel protein	1	1	1	3.21058	0.497256
BGIBMGA011983	novel protein	14	23	124	3.21035	0.948956
gi_162462398	hnRNPA/B_like 28 [B.mori]	4	5	14	3.2072	0.972117
BGIBMGA006984	novel protein	2	2	5	3.20038	0.756012
BGIBMGA002010	novel protein	2	2	5	3.19673	0.656377
gi_161080703	sallimus_ isoform C [D.melanogaster]	1	1	1	3.18386	0.545579
BGIBMGA004573	novel protein	2	2	17	3.1815	0.919954
BGIBMGA007645	novel protein	6	10	50	3.17674	0.900387
BGIBMGA007453	novel protein	4	5	25	3.17506	0.829236
gi_112983802	Mn superoxide dismutase [B.mori]	4	5	22	3.17506	0.829236
BGIBMGA006401	novel protein	1	1	8	3.17379	0.517242
BGIBMGA005656	novel protein	9	10	42	3.17123	0.919254
BGIBMGA002508	novel protein	9	12	35	3.16835	0.999716
gi_45555767	CG9132_ isoform B [D.melanogaster]	1	1	8	3.16444	0.384046
BGIBMGA011004	novel protein	2	2	4	3.16244	0.737285
BGIBMGA002429	novel protein	8	22	130	3.15745	0.901486
BGIBMGA011599	novel protein	2	3	9	3.15278	0.915563
BGIBMGA006141	novel protein	9	11	44	3.15105	0.898248
BGIBMGA006011	novel protein	4	4	12	3.14542	0.854073
gi_24641402	heat shock protein cognate 3_ isoform A [D.melanogaster]	9	26	119	3.14362	0.957925
BGIBMGA007954	novel protein	2	2	4	3.14094	0.54029
BGIBMGA005315	novel protein	15	23	69	3.13823	0.471028
BGIBMGA009240	novel protein	3	5	11	3.13711	0.490605
BGIBMGA009618	novel protein	2	2	4	3.13537	0.156026
BGIBMGA012827	novel protein	1	2	11	3.13117	0.985766
gi_21355103	CG10435 [D.melanogaster]	1	1	2	3.13049	0.507699
BGIBMGA001954	novel protein	3	5	21	3.10241	0.936669
BGIBMGA008894	novel protein	6	12	43	3.10144	0.990324
BGIBMGA001708	novel protein	5	5	19	3.09829	0.99131
BGIBMGA013610	novel protein	1	1	1	3.09587	0.198571
BGIBMGA006724	novel protein	1	1	2	3.09477	0.412452
BGIBMGA004078	novel protein	1	1	2	3.0884	0.664903
BGIBMGA010788	novel protein	3	3	7	3.0872	0.586839
gi_20129913	CG8520_ isoform A [D.melanogaster]	1	1	3	3.08542	0.258739
gi_19921848	CG8258 [D.melanogaster]	1	1	3	3.07182	0.00104528
BGIBMGA012893	novel protein	1	1	5	3.0657	0.669359
BGIBMGA009864	novel protein	2	3	10	3.06453	0.0840101
BGIBMGA004612	novel protein	28	88	364	3.06011	0.812623
gi_21357837	ribosomal protein S5b [D.melanogaster]	3	10	38	3.05943	0.834983
BGIBMGA008498	novel protein	2	2	2	3.05879	0.440935
BGIBMGA009911	novel protein	22	29	129	3.05182	0.551756
BGIBMGA011898	novel protein	2	2	10	3.05125	0.614411
BGIBMGA009129	novel protein	1	1	10	3.0447	0.682732
gi_17647515	heat shock protein cognate 1_ isoform A [D.melanogaster]	7	20	101	3.03984	0.992174
BGIBMGA003637	novel protein	3	3	6	3.03918	0.730891
BGIBMGA011779	novel protein	2	2	12	3.0368	0.962977
BGIBMGA013110	novel protein	1	1	1	3.01857	0.356077
gi_114051770	26S proteasome non_ATPase regulatory subunit 13 [B.mori]	10	11	47	3.01254	0.999671
BGIBMGA012944	novel protein	1	1	4	3.00885	0.725089
BGIBMGA006867	novel protein	5	15	46	3.0071	0.999876
BGIBMGA003335	novel protein	3	3	26	3.00124	0.0995854
BGIBMGA003468	novel protein	6	7	19	2.99821	0.480674
BGIBMGA006722	novel protein	3	3	5	2.99618	0.882801
BGIBMGA006275	novel protein	1	1	5	2.99612	0.665449
BGIBMGA014578	novel protein	5	15	99	2.99452	0.973855
BGIBMGA013136	novel protein	1	3	9	2.99131	0.675106
BGIBMGA010325	novel protein	4	4	24	2.98887	0.651011
BGIBMGA001062	novel protein	1	1	1	2.9848	0.538259
BGIBMGA009845	novel protein	2	2	7	2.98255	0.332881
BGIBMGA006536	novel protein	1	4	9	2.97864	0.929599
BGIBMGA002975	novel protein	2	2	7	2.97517	0.541931
BGIBMGA007710	novel protein	5	12	44	2.97279	0.906001
gi_24638644	CG1970 [D.melanogaster]	2	2	4	2.96108	0.945421
BGIBMGA003042	novel protein	4	4	6	2.95694	0.905959
BGIBMGA008723	novel protein	1	1	1	2.95475	0.413491
BGIBMGA011824	novel protein	1	1	1	2.95016	0.471078
BGIBMGA003439	novel protein	1	1	1	2.93513	0.301127
BGIBMGA011865	novel protein	1	1	2	2.92805	0.363066
gi_112983938	eukaryotic translation initiation factor 3 subunit E [B.mori]	6	6	10	2.91912	0.999976
BGIBMGA000232	novel protein	1	1	2	2.91216	0.305661
BGIBMGA002906	novel protein	1	1	8	2.90295	0.773997
BGIBMGA012503	novel protein	2	2	2	2.90007	0.60741
BGIBMGA010260	novel protein	2	2	4	2.88758	0.863017
gi_114051211	mitochondrial single_stranded DNA_binding protein [B.mori]	1	1	1	2.88515	0.439209
BGIBMGA005323	novel protein	7	8	44	2.88349	0.107283
BGIBMGA005381	novel protein	2	2	4	2.88251	0.827246
BGIBMGA004328	novel protein	1	1	2	2.88209	0.574085
BGIBMGA005113	novel protein	2	2	6	2.88134	0.990537
BGIBMGA002349	novel protein	1	1	1	2.87493	0.207498
BGIBMGA003070	novel protein	3	4	22	2.87232	0.899216
BGIBMGA004276	novel protein	7	9	21	2.86952	0.61495
BGIBMGA013190	novel protein	1	1	2	2.86126	0.439015
BGIBMGA002542	novel protein	11	24	153	2.86108	0.971896
BGIBMGA013328	novel protein	5	5	8	2.85729	0.588009
BGIBMGA007469	novel protein	8	24	101	2.85557	0.999999
BGIBMGA012325	novel protein	1	1	2	2.85216	0.509541
BGIBMGA004374	novel protein	8	36	175	2.84968	1
BGIBMGA005391	novel protein	1	1	2	2.84745	0.0384687
BGIBMGA012037	novel protein	5	6	13	2.83763	0.26363
BGIBMGA014041	novel protein	1	1	9	2.83639	0.860356
BGIBMGA014087	novel protein	8	12	75	2.83534	0.999999
BGIBMGA001044	novel protein	1	1	3	2.83296	0.605402
BGIBMGA007258	novel protein	7	12	63	2.82589	0.463051
BGIBMGA000305	novel protein	2	2	5	2.82519	0.734894
gi_17137654	enolase_ isoform A [D.melanogaster]	1	2	4	2.82396	0.99154
BGIBMGA000132	novel protein	14	18	65	2.82276	0.216681
BGIBMGA000086	novel protein	1	1	2	2.81692	0.515086
BGIBMGA009607	novel protein	2	2	5	2.81647	0.570409
BGIBMGA004408	novel protein	6	6	22	2.81444	0.742384
BGIBMGA000002	novel protein	10	12	52	2.81223	0.479478
BGIBMGA002632	novel protein	1	1	2	2.80922	0.710428
BGIBMGA011788	novel protein	4	5	16	2.80488	0.700069
BGIBMGA010943	novel protein	1	1	1	2.80427	0.336777
gi_17136394	phosphoglycerate kinase [D.melanogaster]	1	1	6	2.80358	0.889558
BGIBMGA011675	novel protein	5	6	12	2.79648	0.558525
BGIBMGA000867	novel protein	12	38	179	2.79402	0.653206
BGIBMGA008957	novel protein	10	11	40	2.79281	0.831197
BGIBMGA003301	novel protein	1	1	9	2.79012	0.762266
BGIBMGA014503	novel protein	7	9	20	2.78905	0.325979
BGIBMGA011695	novel protein	4	4	6	2.78892	0.642519
BGIBMGA010316	novel protein	1	1	1	2.7882	0.0977032
BGIBMGA002582	novel protein	9	15	44	2.78717	0.998321
BGIBMGA004166	novel protein	4	4	17	2.78617	0.277604
BGIBMGA002103	novel protein	1	1	1	2.78579	0.284719
BGIBMGA005452	novel protein	2	2	4	2.7763	0.92687
BGIBMGA009933	novel protein	8	10	32	2.76447	0.183382
BGIBMGA012437	novel protein	7	11	46	2.75993	0.986049
BGIBMGA008205	novel protein	1	1	1	2.75815	0.591173
gi_114050851	tetraspanin E [B.mori]	1	1	3	2.74392	0.16842
BGIBMGA004775	novel protein	1	1	1	2.73941	0.106846
BGIBMGA001353	novel protein	2	4	24	2.73915	0.508987
gi_112982916	RNA binding motif protein Y14 [B.mori]	3	5	14	2.73829	0.962217
BGIBMGA012851	novel protein	17	22	102	2.7341	0.15087
BGIBMGA014175	novel protein	2	6	14	2.73352	0.219499
BGIBMGA008203	novel protein	2	2	11	2.73263	0.132337
BGIBMGA005089	novel protein	2	2	3	2.73225	0.122247
BGIBMGA003652	novel protein	20	29	101	2.72781	0.821398
BGIBMGA006056	novel protein	2	2	10	2.72749	0.851347
gi_21357319	Rpn5 [D.melanogaster]	1	1	1	2.72062	0.704166
BGIBMGA012546	novel protein	3	6	14	2.71742	0.964734
gi_112984248	ribosomal protein L24 [B.mori]	4	9	47	2.71205	0.964836
gi_281363737	CG7461 [D.melanogaster]	1	1	2	2.70782	0.549754
BGIBMGA006849	novel protein	2	2	4	2.70045	0.503024
BGIBMGA009834	novel protein	1	1	5	2.68005	0.658518
BGIBMGA005576	novel protein	1	1	2	2.67071	0.480986
BGIBMGA006819	novel protein	3	3	13	2.66908	0.979884
BGIBMGA007701	novel protein	10	92	449	2.66882	0.880025
BGIBMGA011754	novel protein	5	5	10	2.66517	0.801259
BGIBMGA009131	novel protein	13	25	71	2.66374	0.42674
BGIBMGA003987	novel protein	1	1	10	2.65674	0.0593268
BGIBMGA007936	novel protein	3	3	12	2.65618	0.140749
BGIBMGA009918	novel protein	1	1	6	2.64769	0.737243
BGIBMGA006794	novel protein	1	1	2	2.63879	0.913538
gi_19921254	ribosomal protein L24 [D.melanogaster]	2	2	20	2.63253	0.989909
BGIBMGA011416	novel protein	14	56	239	2.63159	0.992224
BGIBMGA000627	novel protein	4	4	10	2.6243	0.301438
BGIBMGA013504	novel protein	3	3	7	2.6175	0.657742
BGIBMGA001585	novel protein	2	3	4	2.61032	0.731532
BGIBMGA012116	novel protein	8	12	33	2.6103	0.959846
gi_114051630	acid phosphatase isoenzyme [B.mori]	4	4	14	2.61021	0.830433
BGIBMGA010072	novel protein	2	2	5	2.60349	0.638024
gi_21357767	CG1542 [D.melanogaster]	1	2	3	2.60152	0.762709
BGIBMGA007233	novel protein	1	1	4	2.59968	0.544741
BGIBMGA013642	novel protein	1	1	1	2.59154	0.556554
BGIBMGA004210	novel protein	2	3	10	2.59063	0.911921
BGIBMGA004356	novel protein	4	9	51	2.59019	0.149551
BGIBMGA001307	novel protein	6	11	82	2.58642	0.994471
BGIBMGA014094	novel protein	4	4	16	2.58222	0.45313
BGIBMGA014144	novel protein	3	3	6	2.57881	0.997475
BGIBMGA007604	novel protein	4	4	12	2.5739	0.851788
BGIBMGA003221	novel protein	5	6	18	2.56131	0.722653
BGIBMGA009515	novel protein	11	19	55	2.56117	0.999926
gi_114052647	trafficking protein particle complex 6b [B.mori]	1	1	1	2.55505	0.396937
BGIBMGA012304	novel protein	7	7	44	2.54572	0.688269
BGIBMGA003243	novel protein	2	2	5	2.54294	0.599873
BGIBMGA008405	novel protein	1	1	1	2.54288	0.394768
BGIBMGA008291	novel protein	1	1	1	2.53928	0.406632
BGIBMGA010970	novel protein	8	24	97	2.53846	0.944825
gi_24642586	rudimentary_ isoform A [D.melanogaster]	2	2	2	2.53813	0.27287
gi_17530803	males absent on the first [D.melanogaster]	1	1	1	2.53741	0.303607
BGIBMGA010657	novel protein	11	13	66	2.53538	0.620216
BGIBMGA007795	novel protein	5	12	48	2.53105	0.995544
BGIBMGA013515	novel protein	5	8	14	2.52988	0.355604
BGIBMGA006851	novel protein	6	7	14	2.52685	0.783877
BGIBMGA000528	novel protein	13	17	58	2.52466	0.543267
BGIBMGA000231	novel protein	1	1	12	2.51973	0.926319
BGIBMGA010209	novel protein	1	1	5	2.51596	0.020385
BGIBMGA002769	novel protein	2	2	8	2.51213	0.900886
BGIBMGA007881	novel protein	1	1	1	2.50449	0.559862
BGIBMGA009969	novel protein	1	1	8	2.50199	0.894419
BGIBMGA002675	novel protein	2	3	9	2.49751	0.51107
BGIBMGA011096	novel protein	1	1	12	2.49434	0.749931
BGIBMGA012674	novel protein	2	2	4	2.49275	0.82107
gi_112983114	seroin 2 precursor [B.mori]	1	2	13	2.48423	0.605163
gi_17981711	upstream of RpIII128 [D.melanogaster]	5	6	26	2.48306	0.817174
BGIBMGA006424	novel protein	6	7	19	2.48164	0.945667
BGIBMGA001188	novel protein	3	3	6	2.48027	0.594672
BGIBMGA012671	novel protein	2	2	8	2.47945	0.713045
BGIBMGA002241	novel protein	11	12	47	2.47448	1
BGIBMGA005559	novel protein	3	5	15	2.47085	0.905761
gi_300068967	Bm8 interacting protein precursor [B.mori]	14	15	49	2.46778	0.514376
BGIBMGA004888	novel protein	1	1	7	2.46381	0.78658
BGIBMGA008959	novel protein	2	2	5	2.46295	0.812912
BGIBMGA013923	novel protein	1	1	2	2.46221	0.477687
BGIBMGA013971	novel protein	6	7	44	2.45957	0.732945
BGIBMGA013096	novel protein	5	6	38	2.45893	0.325545
BGIBMGA002911	novel protein	1	1	1	2.45851	0.531015
BGIBMGA006357	novel protein	6	6	11	2.45322	0.174779
BGIBMGA008864	novel protein	1	1	1	2.45248	0.609023
gi_21357917	CG4287_ isoform A [D.melanogaster]	1	1	1	2.44638	0.466966
gi_281366812	CG42617 [D.melanogaster]	1	1	1	2.44595	0.558249
BGIBMGA000622	novel protein	3	3	3	2.44567	0.48464
BGIBMGA010238	novel protein	1	1	3	2.44485	0.517657
BGIBMGA009814	novel protein	3	3	9	2.44308	0.185219
BGIBMGA007942	novel protein	1	1	4	2.43864	0.284554
gi_183980002	collagen_ type IV [B.mori]	2	2	2	2.43381	0.890878
BGIBMGA011237	novel protein	1	1	2	2.43261	0.979583
BGIBMGA011049	novel protein	3	3	14	2.43253	0.339703
gi_17137298	pyruvate dehydrogenase kinase_ isoform A [D.melanogaster]	1	1	1	2.43088	0.628492
BGIBMGA006932	novel protein	3	3	23	2.43017	0.687617
BGIBMGA010578	novel protein	3	3	4	2.42499	0.977209
BGIBMGA006888	novel protein	1	1	3	2.41734	0.133681
BGIBMGA011334	novel protein	2	2	3	2.41678	0.100355
gi_114051447	NADH dehydrogenase_ubiquinone Fe_S protein 2 [B.mori]	7	8	23	2.41312	0.999796
BGIBMGA007418	novel protein	9	15	91	2.4114	1
BGIBMGA004910	novel protein	3	4	28	2.40728	0.103526
gi_24640873	CG1354_ isoform A [D.melanogaster]	1	1	2	2.4067	0.00531221
BGIBMGA010588	novel protein	2	4	20	2.40335	0.99466
BGIBMGA003186	novel protein	22	44	256	2.38926	0.631245
BGIBMGA005205	novel protein	2	8	26	2.38778	0.993105
gi_17137216	Rab_protein 11_ isoform B [D.melanogaster]	3	3	6	2.38772	0.0805725
BGIBMGA013598	novel protein	2	2	3	2.38756	0.705219
BGIBMGA001323	novel protein	4	4	16	2.38601	0.337393
BGIBMGA006945	novel protein	13	20	70	2.37932	0.309127
BGIBMGA003584	novel protein	1	1	8	2.37918	0.341097
BGIBMGA000803	novel protein	2	2	4	2.36789	0.737952
BGIBMGA005999	novel protein	7	8	23	2.36125	0.42394
BGIBMGA005267	novel protein	1	1	1	2.35936	0.497828
BGIBMGA009608	novel protein	1	1	2	2.34889	0.387465
BGIBMGA005537	novel protein	4	4	12	2.34562	0.156679
BGIBMGA002039	novel protein	3	4	18	2.3441	0.997525
BGIBMGA001474	novel protein	1	1	2	2.34343	0.699317
BGIBMGA011819	novel protein	7	8	48	2.34191	0.187029
BGIBMGA011131	novel protein	7	7	19	2.33952	0.998392
BGIBMGA006450	novel protein	1	1	9	2.33629	0.831255
gi_112984376	ribosomal protein L14 [B.mori]	6	73	368	2.33623	0.422893
BGIBMGA009130	novel protein	4	31	130	2.33597	0.578796
BGIBMGA004908	novel protein	4	5	13	2.33555	0.98761
BGIBMGA004892	novel protein	3	4	8	2.32951	0.962229
BGIBMGA012549	novel protein	22	135	631	2.32544	0.956876
BGIBMGA013680	novel protein	3	5	20	2.32103	0.965107
BGIBMGA009467	novel protein	5	6	14	2.32051	0.143
gi_24647050	suppressor of variegation 3_9_ isoform A [D.melanogaster]	1	1	1	2.3177	0.951205
BGIBMGA010819	novel protein	1	1	1	2.3159	0.56508
BGIBMGA006653	novel protein	2	2	9	2.3078	0.68085
gi_24651187	CG7816_ isoform A [D.melanogaster]	1	1	1	2.30352	0.505781
BGIBMGA007656	novel protein	1	2	6	2.29963	0.573607
gi_19920794	CG9140 [D.melanogaster]	2	2	3	2.29724	0.993601
BGIBMGA007783	novel protein	7	8	20	2.29546	0.999953
BGIBMGA005493	novel protein	12	18	82	2.28981	1
BGIBMGA001206	novel protein	19	26	101	2.2888	0.98384
BGIBMGA000302	novel protein	3	3	7	2.28527	0.456482
BGIBMGA006751	novel protein	5	8	43	2.28162	0.833375
BGIBMGA002967	novel protein	11	15	50	2.27951	0.481008
gi_24641047	Rab GTPase 9D [D.melanogaster]	1	3	21	2.27585	0.843432
gi_24641058	Rab GTPase 9Db [D.melanogaster]	1	3	21	2.27585	0.843432
BGIBMGA002453	novel protein	1	1	7	2.26865	0.763107
BGIBMGA005635	novel protein	3	3	12	2.2662	0.894196
BGIBMGA010032	novel protein	2	2	3	2.26436	0.766455
BGIBMGA004979	novel protein	2	2	2	2.26415	0.537174
gi_112983600	cellular retinoic acid binding protein [B.mori]	11	22	142	2.26328	1
BGIBMGA001336	novel protein	6	6	11	2.25625	0.876116
BGIBMGA004850	novel protein	2	3	17	2.25483	0.617859
BGIBMGA009535	novel protein	1	1	11	2.25124	0.460191
BGIBMGA005550	novel protein	3	23	41	2.24938	0.597877
gi_114053313	GTP binding protein [B.mori]	17	30	166	2.24754	0.856962
BGIBMGA006919	novel protein	2	2	10	2.24577	0.193728
BGIBMGA003978	novel protein	4	25	111	2.24372	0.999847
BGIBMGA001734	novel protein	1	2	3	2.23616	0.866328
BGIBMGA010068	novel protein	8	9	31	2.23255	0.0824433
BGIBMGA011514	novel protein	1	1	1	2.23227	0.231875
BGIBMGA009970	novel protein	7	8	23	2.23083	0.458561
BGIBMGA003519	novel protein	7	8	51	2.22123	0.0503963
BGIBMGA007103	novel protein	5	7	11	2.22033	0.0743883
BGIBMGA008214	novel protein	6	9	29	2.2176	0.999585
BGIBMGA003258	novel protein	2	2	4	2.21732	0.879729
gi_114050747	coiled_coil domain containing 25 protein [B.mori]	1	1	2	2.21465	0.51535
BGIBMGA009574	novel protein	1	1	2	2.21327	0.775303
gi_17136898	walrus_ isoform B [D.melanogaster]	1	2	16	2.21032	0.00130875
BGIBMGA004905	novel protein	5	16	81	2.20905	0.359533
BGIBMGA005328	novel protein	1	1	6	2.20833	0.439659
gi_221459032	CG13615 [D.melanogaster]	1	1	1	2.20629	0.650858
BGIBMGA002461	novel protein	1	2	13	2.20613	2.01613e-05
BGIBMGA002979	novel protein	1	1	2	2.19774	0.522653
gi_114051706	antennal_enriched UDP_glycosyltransferase precursor [B.mori]	2	2	3	2.18713	0.47314
BGIBMGA006907	novel protein	15	19	112	2.1823	0.889021
BGIBMGA009241	novel protein	5	6	37	2.17813	0.12959
BGIBMGA002376	novel protein	4	5	8	2.17803	0.641307
BGIBMGA004377	novel protein	1	1	5	2.17613	0.304348
gi_24660002	quemao_ isoform A [D.melanogaster]	1	1	1	2.1741	0.631913
BGIBMGA012203	novel protein	1	1	6	2.16726	0.740785
BGIBMGA007684	novel protein	1	2	6	2.15908	0.506523
gi_24645861	translationally controlled tumor protein [D.melanogaster]	1	1	5	2.15892	0.439277
BGIBMGA004036	novel protein	1	1	1	2.1554	0.497678
gi_17136866	ADP ribosylation factor 79F_ isoform B [D.melanogaster]	6	14	49	2.14808	0.988585
BGIBMGA003367	novel protein	2	3	17	2.14541	0.925407
gi_24647885	14_3_3epsilon_ isoform A [D.melanogaster]	5	25	77	2.13717	0.108218
gi_20129563	CG17331 [D.melanogaster]	1	1	3	2.13606	0.432059
BGIBMGA010979	novel protein	3	3	14	2.13598	0.311532
BGIBMGA010971	novel protein	4	5	8	2.12853	0.644313
BGIBMGA011742	novel protein	1	1	2	2.12718	0.648027
BGIBMGA007805	novel protein	2	2	9	2.12383	0.805471
BGIBMGA005086	novel protein	3	3	7	2.11715	0.9162
BGIBMGA000710	novel protein	9	10	26	2.11203	0.826084
BGIBMGA009875	novel protein	9	10	33	2.1056	0.999899
BGIBMGA010756	novel protein	2	2	4	2.10546	0.13982
BGIBMGA006476	novel protein	2	2	2	2.1046	0.730287
BGIBMGA007224	novel protein	4	5	26	2.10411	0.0512639
BGIBMGA004846	novel protein	3	8	30	2.10239	0.780047
BGIBMGA003522	novel protein	1	1	2	2.10206	0.651841
gi_112983038	chemosensory protein 9 precursor [B.mori]	1	1	1	2.10143	0.49175
BGIBMGA013497	novel protein	1	1	2	2.09703	0.717677
BGIBMGA001243	novel protein	2	2	7	2.09471	0.738755
BGIBMGA000918	novel protein	4	5	17	2.0878	0.944451
gi_24655413	CG15109_ isoform C [D.melanogaster]	1	1	1	2.08778	0.632742
BGIBMGA001711	novel protein	1	1	3	2.08455	0.190077
BGIBMGA003377	novel protein	1	1	2	2.08213	0.682174
BGIBMGA004102	novel protein	5	6	27	2.08186	0.999965
BGIBMGA007363	novel protein	3	16	64	2.07841	0.979641
BGIBMGA013011	novel protein	1	1	1	2.07797	0.110769
BGIBMGA009684	novel protein	6	7	32	2.07304	0.853918
gi_24585671	histone H2B [D.melanogaster]	4	65	324	2.07293	0.643825
BGIBMGA001991	novel protein	3	12	59	2.07164	0.999997
BGIBMGA003340	novel protein	1	1	7	2.07041	0.495689
BGIBMGA013100	novel protein	2	5	21	2.06974	0.995383
BGIBMGA000328	novel protein	2	2	12	2.06883	0.989727
BGIBMGA012474	novel protein	1	1	9	2.06775	0.479929
BGIBMGA005853	novel protein	5	6	17	2.06414	0.998917
BGIBMGA007585	novel protein	1	1	2	2.0582	0.753202
BGIBMGA005395	novel protein	4	4	16	2.05773	0.951864
BGIBMGA012904	novel protein	4	10	58	2.05197	0.936295
BGIBMGA005701	novel protein	3	3	11	2.0518	0.888324
gi_281362907	nyobe_ isoform C [D.melanogaster]	1	1	4	2.0479	0.0302888
BGIBMGA004986	novel protein	2	2	3	2.04211	0.859545
BGIBMGA006221	novel protein	3	7	49	2.04183	0.935106
BGIBMGA001915	novel protein	3	3	12	2.03989	0.133386
gi_114052018	nucleosome assembly protein isoform 2 [B.mori]	7	12	33	2.03875	0.999999
gi_17975567	ribosomal protein S15Aa_ isoform D [D.melanogaster]	2	2	3	2.03611	0.863121
gi_114052038	actin related protein 2/3 complex subunit 4 [B.mori]	3	3	15	2.03282	0.894351
BGIBMGA011507	novel protein	1	1	1	2.03266	0.279701
BGIBMGA007770	novel protein	4	4	15	2.03174	0.272787
BGIBMGA006477	novel protein	2	2	5	2.02479	0.980756
BGIBMGA000323	novel protein	1	1	1	2.02345	0.568787
gi_24642142	HDAC6_ isoform A [D.melanogaster]	1	1	1	2.02345	0.568787
BGIBMGA012163	novel protein	1	1	2	2.02324	0.776374
BGIBMGA003178	novel protein	3	3	11	2.02169	0.584369
BGIBMGA013021	novel protein	15	32	172	2.02021	1
BGIBMGA001556	novel protein	1	1	1	2.01984	0.558506
BGIBMGA004596	novel protein	1	1	2	2.01967	0.204566
BGIBMGA012931	novel protein	1	1	2	2.01141	0.750847
gi_24585112	CG10470 [D.melanogaster]	1	1	1	2.00746	0.738886
BGIBMGA007723	novel protein	5	5	12	2.00649	0.57228
BGIBMGA004540	novel protein	4	4	10	2.00483	0.243217
BGIBMGA000102	novel protein	5	5	31	2.00405	0.423822
BGIBMGA005486	novel protein	1	1	4	2.00235	0.851624
BGIBMGA014211	novel protein	1	1	1	2.00153	0.622302
gi_114052589	phosphate transport protein [B.mori]	9	13	50	1.9977	0.985896
BGIBMGA013777	novel protein	3	6	41	1.99757	0.694555
BGIBMGA007712	novel protein	2	2	3	1.99626	0.682786
BGIBMGA007311	novel protein	5	17	100	1.99598	0.915792
BGIBMGA004776	novel protein	5	5	28	1.99505	0.999866
BGIBMGA013514	novel protein	1	1	2	1.99222	0.685594
BGIBMGA004534	novel protein	4	4	14	1.9921	0.607303
BGIBMGA004666	novel protein	2	8	33	1.98437	0.988919
gi_17647529	heat shock protein 83 [D.melanogaster]	9	28	93	1.97856	0.903085
gi_24661336	arginine kinase_ isoform A [D.melanogaster]	6	18	96	1.9758	0.999937
BGIBMGA003923	novel protein	4	18	53	1.9754	0.760075
BGIBMGA010129	novel protein	5	6	22	1.97289	0.740876
BGIBMGA001966	novel protein	4	4	7	1.97231	0.427862
BGIBMGA011280	novel protein	3	5	20	1.96835	0.73123
BGIBMGA011973	novel protein	2	2	5	1.96768	0.65121
BGIBMGA005511	novel protein	1	1	1	1.96655	0.524143
BGIBMGA006264	novel protein	1	1	4	1.9556	0.779124
gi_356991242	Bphl_like protein [B.mori]	1	1	2	1.9556	0.779124
BGIBMGA005564	novel protein	5	5	21	1.95518	0.99448
BGIBMGA001777	novel protein	1	1	1	1.95317	0.634904
gi_24647566	CG16941 [D.melanogaster]	1	1	1	1.95214	0.633822
BGIBMGA009902	novel protein	1	1	1	1.9503	0.40016
gi_17647589	little imaginal discs_ isoform A [D.melanogaster]	1	1	1	1.94972	0.849144
BGIBMGA000796	novel protein	1	1	1	1.94959	0.586146
gi_24655502	ribosomal protein L23A [D.melanogaster]	2	3	9	1.94631	0.711777
BGIBMGA003004	novel protein	3	3	15	1.93225	0.94438
BGIBMGA011696	novel protein	4	4	15	1.93114	0.57416
BGIBMGA013860	novel protein	4	6	9	1.92961	0.586369
BGIBMGA004824	novel protein	8	10	31	1.92667	0.57568
gi_8572573	ATP synthase F0 subunit 8 [B.mori]	1	1	1	1.92587	0.480135
BGIBMGA001107	novel protein	14	18	81	1.92348	0.999998
BGIBMGA007844	novel protein	1	1	2	1.92295	0.652462
BGIBMGA002211	novel protein	1	1	2	1.91967	0.34179
BGIBMGA006816	novel protein	11	11	23	1.91906	0.0809262
gi_112984508	translation initiation factor 2 gamma subunit [B.mori]	10	12	86	1.91073	1
BGIBMGA004823	novel protein	2	3	4	1.91009	0.749476
BGIBMGA006200	novel protein	2	2	12	1.90944	0.960553
BGIBMGA003820	novel protein	2	2	3	1.90846	0.473021
BGIBMGA003463	novel protein	1	1	3	1.90737	0.344939
BGIBMGA009760	novel protein	1	2	8	1.90654	0.944214
BGIBMGA005347	novel protein	6	20	112	1.90508	0.557421
gi_19922746	ribosomal protein S16 [D.melanogaster]	4	17	44	1.90451	1
BGIBMGA004169	novel protein	3	3	15	1.90325	0.602896
BGIBMGA002987	novel protein	1	1	1	1.90243	0.56646
BGIBMGA007310	novel protein	2	2	4	1.8987	0.374408
BGIBMGA011446	novel protein	1	1	5	1.89841	0.946972
BGIBMGA007079	novel protein	13	16	96	1.89553	0.997669
BGIBMGA008563	novel protein	1	1	1	1.89454	0.388353
BGIBMGA011117	novel protein	3	4	16	1.89382	0.982099
BGIBMGA012934	novel protein	2	2	5	1.89349	0.850475
BGIBMGA001209	novel protein	1	1	4	1.89313	0.930992
BGIBMGA013635	novel protein	4	5	14	1.88751	0.999693
BGIBMGA005752	novel protein	28	37	146	1.88543	0.519938
BGIBMGA012571	novel protein	2	4	17	1.8816	0.996624
BGIBMGA000201	novel protein	3	5	35	1.88156	0.479615
BGIBMGA006728	novel protein	1	1	1	1.88043	0.613547
BGIBMGA009554	novel protein	2	2	5	1.87652	0.946697
BGIBMGA006109	novel protein	2	2	7	1.87525	0.692818
BGIBMGA012859	novel protein	3	3	12	1.87297	0.778855
BGIBMGA003267	novel protein	3	3	3	1.86868	0.748355
BGIBMGA011412	novel protein	2	2	6	1.86708	0.924245
BGIBMGA014122	novel protein	1	1	1	1.86554	0.570592
gi_112983786	sterol carrier protein x [B.mori]	3	3	5	1.8575	0.989374
BGIBMGA014417	novel protein	4	4	7	1.85581	0.612891
gi_164448660	cytochrome c oxidase polypeptide Vb [B.mori]	4	4	5	1.84709	0.961971
BGIBMGA008416	novel protein	1	1	1	1.8429	0.528655
BGIBMGA000390	novel protein	28	37	156	1.84273	0.399124
gi_24644272	Pi4KIIalpha_ isoform B [D.melanogaster]	1	1	3	1.83918	0.891255
BGIBMGA013491	novel protein	3	3	3	1.83638	0.790378
BGIBMGA003527	novel protein	1	1	2	1.8347	0.21496
BGIBMGA002880	novel protein	1	1	1	1.83021	0.613915
BGIBMGA010520	novel protein	2	3	23	1.82976	0.638072
BGIBMGA011467	novel protein	9	23	92	1.82524	0.98006
BGIBMGA000626	novel protein	1	1	2	1.82358	0.807168
gi_162462178	Ef1alpha_like factor isoform 2 [B.mori]	9	11	21	1.82077	0.0515323
BGIBMGA006216	novel protein	3	3	26	1.81725	0.999998
BGIBMGA003597	novel protein	4	8	15	1.81587	0.939681
gi_17864182	ADP ribosylation factor 102F [D.melanogaster]	3	6	21	1.81489	0.997516
BGIBMGA004191	novel protein	2	5	15	1.814	0.878442
BGIBMGA001126	novel protein	12	18	62	1.81157	0.931135
BGIBMGA011500	novel protein	7	7	19	1.81087	1
BGIBMGA014039	novel protein	3	3	4	1.8094	0.504754
BGIBMGA007230	novel protein	11	13	47	1.8071	0.0584014
BGIBMGA001500	novel protein	2	2	3	1.80398	0.340345
BGIBMGA003212	novel protein	9	11	51	1.80356	0.998797
gi_17647231	calmodulin_ isoform A [D.melanogaster]	5	9	58	1.8029	0.990865
BGIBMGA001928	novel protein	4	4	23	1.80243	0.769521
gi_112982751	60S ribosomal protein L38 [B.mori]	3	4	16	1.79684	0.9564
gi_112983134	heat shock protein hsp20.1 [B.mori]	1	1	1	1.79334	0.163628
gi_114052691	ras small monomeric GTPase Rab6 [B.mori]	7	10	60	1.78848	0.961391
BGIBMGA008391	novel protein	7	10	33	1.78762	0.975313
BGIBMGA007702	novel protein	2	2	4	1.78557	0.932754
BGIBMGA011234	novel protein	1	1	2	1.78475	0.249028
gi_24649793	RabX4 [D.melanogaster]	1	2	4	1.78377	1
BGIBMGA014560	novel protein	1	5	25	1.78203	0.996145
BGIBMGA013634	novel protein	3	4	6	1.78195	0.469057
BGIBMGA001805	novel protein	1	1	1	1.78171	0.693709
BGIBMGA008848	novel protein	1	1	4	1.77846	0.819602
BGIBMGA008426	novel protein	10	12	48	1.77717	0.220263
BGIBMGA012472	novel protein	2	3	14	1.77675	0.997149
gi_17136708	downstream of receptor kinase_ isoform A [D.melanogaster]	1	1	2	1.77613	0.247599
BGIBMGA001174	novel protein	2	2	10	1.77163	0.843187
BGIBMGA011344	novel protein	2	2	10	1.76466	0.741498
gi_24638724	unc_13_ isoform B [D.melanogaster]	1	1	2	1.76344	0.753537
BGIBMGA001609	novel protein	3	4	4	1.75955	0.94035
BGIBMGA000295	novel protein	1	2	4	1.75523	0.850403
gi_17864296	chrowded [D.melanogaster]	1	2	4	1.75523	0.850403
BGIBMGA010764	novel protein	1	1	1	1.75473	0.638451
gi_166706854	argonaute 2 [B.mori]	5	5	9	1.75344	0.443677
BGIBMGA002898	novel protein	3	5	30	1.75048	0.474458
BGIBMGA012008	novel protein	1	1	1	1.7481	0.568395
gi_24655252	puromycin sensitive aminopeptidase_ isoform C [D.melanogaster]	1	1	3	1.74716	0.865566
BGIBMGA004626	novel protein	1	1	1	1.74433	0.503102
gi_256773186	sarco/endoplasmic reticulum calcium ATPase [B.mori]	19	26	114	1.74005	0.128302
BGIBMGA004909	novel protein	1	1	1	1.73883	0.560066
BGIBMGA007971	novel protein	3	6	20	1.73761	0.447415
BGIBMGA003402	novel protein	1	1	2	1.73748	0.828598
BGIBMGA012833	novel protein	1	1	7	1.73304	0.816696
BGIBMGA008294	novel protein	1	1	2	1.73274	0.0874514
gi_114051868	hydroxysteroid dehydrogenase [B.mori]	2	2	4	1.72781	0.612484
BGIBMGA007268	novel protein	9	12	44	1.72733	0.999997
BGIBMGA005975	novel protein	1	1	2	1.72062	0.867521
BGIBMGA011323	novel protein	1	1	1	1.71993	0.674141
gi_114052186	prefoldin subunit 3 [B.mori]	2	2	6	1.71772	0.68874
BGIBMGA011218	novel protein	5	5	15	1.71162	0.445914
BGIBMGA008256	novel protein	3	4	13	1.7061	0.379342
BGIBMGA000767	novel protein	1	1	3	1.70488	0.723452
gi_24583279	maternal expression at 31B_ isoform A [D.melanogaster]	5	6	16	1.70475	0.998372
BGIBMGA007039	novel protein	1	1	1	1.70084	0.597817
BGIBMGA013119	novel protein	1	1	1	1.69948	0.623287
gi_17647245	T_complex chaperonin 5_ isoform A [D.melanogaster]	1	2	6	1.69912	0.999998
BGIBMGA000722	novel protein	1	1	1	1.69401	0.0241768
BGIBMGA001302	novel protein	1	4	9	1.68947	0.756313
gi_17352473	fat [D.melanogaster]	1	6	8	1.68641	0.934211
BGIBMGA000921	novel protein	2	2	7	1.68002	0.628183
BGIBMGA006840	novel protein	2	3	9	1.67002	0.901138
BGIBMGA006772	novel protein	10	10	42	1.66994	0.62496
BGIBMGA009361	novel protein	2	3	5	1.66877	0.789063
gi_19922390	ribosomal protein S15_ isoform A [D.melanogaster]	1	2	4	1.66863	0.993572
BGIBMGA011357	novel protein	3	3	15	1.66683	0.986381
BGIBMGA003009	novel protein	4	4	16	1.66626	0.852569
BGIBMGA012429	novel protein	4	6	27	1.66277	0.999228
BGIBMGA000758	novel protein	2	2	2	1.65946	0.738714
BGIBMGA008881	novel protein	5	45	255	1.65732	0.146302
gi_24661707	ribosomal protein S9_ isoform A [D.melanogaster]	4	17	84	1.65157	0.999997
BGIBMGA007743	novel protein	9	27	112	1.64807	0.906726
BGIBMGA005231	novel protein	1	1	1	1.64624	0.598979
gi_114053127	aspartate aminotransferase [B.mori]	13	16	97	1.64387	1
gi_21358099	SC35_ isoform B [D.melanogaster]	1	1	4	1.64382	0.988527
BGIBMGA009841	novel protein	1	2	11	1.63794	0.902663
BGIBMGA011196	novel protein	1	1	1	1.63629	0.633616
BGIBMGA008020	novel protein	1	1	10	1.63593	0.863912
BGIBMGA001735	novel protein	3	4	9	1.63589	0.938323
BGIBMGA010959	novel protein	2	4	31	1.63578	0.132488
gi_18858175	CG7033_ isoform A [D.melanogaster]	3	4	15	1.63373	0.919182
gi_114052286	glutathione S_transferase unclassified 2 [B.mori]	1	1	9	1.63352	0.210833
BGIBMGA007412	novel protein	2	2	6	1.63247	0.481565
BGIBMGA000292	novel protein	12	15	80	1.63223	0.862599
gi_112982661	ribosomal protein S6 [B.mori]	8	43	193	1.63201	0.525336
BGIBMGA008408	novel protein	5	6	8	1.6307	0.673585
BGIBMGA006735	novel protein	1	1	2	1.63063	0.755593
BGIBMGA001303	novel protein	4	5	22	1.62991	0.915996
BGIBMGA001406	novel protein	17	20	74	1.62762	0.901332
BGIBMGA010541	novel protein	1	1	11	1.62697	0.984183
BGIBMGA007043	novel protein	1	1	4	1.62689	0.247563
BGIBMGA008327	novel protein	2	2	4	1.62656	0.513751
BGIBMGA002990	novel protein	1	1	1	1.62489	0.433621
BGIBMGA003977	novel protein	13	20	146	1.62263	0.750086
BGIBMGA003412	novel protein	5	9	18	1.62051	0.94579
BGIBMGA013200	novel protein	1	1	1	1.61923	0.414765
BGIBMGA005897	novel protein	3	3	24	1.61904	0.980094
BGIBMGA009463	novel protein	6	6	14	1.61859	0.58082
BGIBMGA009411	novel protein	8	14	22	1.61836	1
BGIBMGA002394	novel protein	4	5	13	1.61728	0.997206
BGIBMGA001037	novel protein	27	33	116	1.61473	0.39104
BGIBMGA014442	novel protein	5	6	28	1.61375	0.999489
BGIBMGA007144	novel protein	5	6	16	1.61048	0.938438
BGIBMGA010337	novel protein	2	2	2	1.60737	0.838756
BGIBMGA012127	novel protein	1	1	2	1.60582	0.859631
BGIBMGA001471	novel protein	3	5	12	1.60442	0.9998
BGIBMGA012626	novel protein	10	37	160	1.60149	0.988772
BGIBMGA004090	novel protein	5	6	11	1.59804	0.655225
BGIBMGA008664	novel protein	4	4	10	1.59692	0.979964
BGIBMGA010621	novel protein	8	8	16	1.59518	0.276102
gi_112984394	ribosomal protein S16 [B.mori]	10	47	169	1.59445	1
BGIBMGA006091	novel protein	1	1	7	1.59396	0.985139
BGIBMGA013896	novel protein	1	1	2	1.59337	0.239784
BGIBMGA007603	novel protein	4	7	26	1.59311	0.99956
BGIBMGA000073	novel protein	2	2	2	1.58925	0.348112
BGIBMGA006523	novel protein	2	2	10	1.58912	0.558751
gi_112983388	FK506_binding protein FKBP59 homologue [B.mori]	4	4	10	1.5824	0.559186
BGIBMGA001060	novel protein	2	2	7	1.57852	0.873167
BGIBMGA011615	novel protein	6	7	13	1.57515	0.358531
gi_24645657	CG11872 [D.melanogaster]	1	2	4	1.57494	0.717626
BGIBMGA012961	novel protein	4	5	29	1.57485	0.999991
BGIBMGA000936	novel protein	4	4	22	1.57433	0.947338
gi_24645407	AP_47 [D.melanogaster]	3	4	7	1.57389	0.998988
gi_115292419	glutamate synthase [B.mori]	35	43	139	1.56407	0.440088
BGIBMGA014483	novel protein	5	5	22	1.56092	0.731619
gi_114051245	proteasome alpha 3 subunit [B.mori]	4	4	20	1.55591	0.953457
BGIBMGA011460	novel protein	1	1	1	1.55427	0.342527
gi_17137450	regulatory particle non_ATPase 3 [D.melanogaster]	2	2	8	1.55209	0.408372
BGIBMGA009863	novel protein	4	12	47	1.55067	0.999996
BGIBMGA005860	novel protein	1	1	1	1.54806	0.755277
BGIBMGA009778	novel protein	1	1	4	1.54527	0.650914
BGIBMGA012268	novel protein	1	1	1	1.54442	0.626005
BGIBMGA008503	novel protein	1	1	3	1.54368	0.854913
BGIBMGA007503	novel protein	3	3	4	1.5424	0.859737
BGIBMGA005434	novel protein	1	1	9	1.53786	0.625407
gi_116008196	CG15307 [D.melanogaster]	1	1	1	1.53772	0.663299
BGIBMGA008551	novel protein	18	24	93	1.53762	0.242812
gi_45551099	proteasome p44.5 subunit_ isoform A [D.melanogaster]	2	2	4	1.53624	0.830895
BGIBMGA006977	novel protein	1	2	3	1.53489	0.957185
BGIBMGA011948	novel protein	2	15	60	1.53126	0.998569
BGIBMGA003165	novel protein	1	1	1	1.52955	0.580365
gi_24642172	adenosylhomocysteinase at 13 [D.melanogaster]	1	1	1	1.52915	0.7741
BGIBMGA011677	novel protein	2	2	2	1.52731	0.587596
BGIBMGA014155	novel protein	2	3	4	1.52624	0.826909
BGIBMGA011604	novel protein	2	4	24	1.5256	0.999999
BGIBMGA006045	novel protein	4	5	19	1.52394	0.975051
BGIBMGA009468	novel protein	1	1	4	1.52187	0.856546
BGIBMGA008929	novel protein	1	1	1	1.51771	0.665454
BGIBMGA004396	novel protein	2	2	2	1.51496	0.966101
BGIBMGA012922	novel protein	15	18	93	1.51111	0.13968
gi_187281361	transformer 2 isoform A [B.mori]	1	1	6	1.50929	0.0863614
gi_17737302	adenine nucleotide translocase 2_ isoform A [D.melanogaster]	1	1	3	1.50889	0.910268
BGIBMGA004833	novel protein	4	6	19	1.50749	0.983323
BGIBMGA006233	novel protein	1	1	1	1.50641	0.779932
BGIBMGA000150	novel protein	1	1	3	1.5028	0.875449
BGIBMGA003767	novel protein	2	3	8	1.49882	0.999358
BGIBMGA000103	novel protein	16	19	73	1.49728	0.802323
BGIBMGA006162	novel protein	3	3	7	1.49697	0.310242
BGIBMGA000947	novel protein	1	1	2	1.49515	0.421714
BGIBMGA001106	novel protein	4	15	63	1.49407	0.978879
gi_206725501	stromal interaction molecule 1 precursor [B.mori]	3	3	4	1.49343	0.227903
gi_45553475	glutamate dehydrogenase_ isoform F [D.melanogaster]	7	8	11	1.48986	1
BGIBMGA009893	novel protein	1	1	2	1.48715	0.45803
BGIBMGA008926	novel protein	5	6	13	1.48685	0.892716
BGIBMGA007734	novel protein	4	4	10	1.48663	0.999989
gi_112984454	protein disulfide isomerase precursor [B.mori]	23	210	1076	1.48661	1
BGIBMGA000447	novel protein	2	2	2	1.48536	0.408302
BGIBMGA013244	novel protein	3	3	6	1.48436	0.875513
gi_21357685	CG7139_ isoform A [D.melanogaster]	2	3	11	1.48429	0.924165
BGIBMGA003351	novel protein	1	1	1	1.48353	0.687364
BGIBMGA012025	novel protein	1	1	11	1.47949	0.999113
gi_24584187	sec71_ isoform A [D.melanogaster]	2	2	4	1.4791	0.381966
BGIBMGA004940	novel protein	1	1	2	1.4772	0.840357
BGIBMGA012772	novel protein	10	19	121	1.47642	0.656104
BGIBMGA009359	novel protein	5	6	25	1.47619	0.816898
BGIBMGA004406	novel protein	1	1	1	1.47569	0.213514
BGIBMGA000944	novel protein	4	4	29	1.47425	0.697695
BGIBMGA000473	novel protein	4	4	13	1.46386	0.503798
gi_148298793	ribosomal protein P1 [B.mori]	6	13	42	1.46359	0.996784
BGIBMGA007187	novel protein	1	1	1	1.46319	0.700314
BGIBMGA010789	novel protein	1	1	3	1.4608	0.788568
BGIBMGA014181	novel protein	8	9	32	1.46042	0.996967
BGIBMGA001458	novel protein	3	4	10	1.45859	0.587277
BGIBMGA006704	novel protein	8	11	41	1.4573	0.727706
BGIBMGA005312	novel protein	1	1	2	1.45435	0.925269
BGIBMGA002439	novel protein	2	2	5	1.45034	0.937352
gi_24583984	Vha68_2_ isoform A [D.melanogaster]	6	9	26	1.44886	0.918799
gi_17136320	ribosomal protein LP1 [D.melanogaster]	1	2	2	1.44883	0.928761
BGIBMGA004541	novel protein	4	6	43	1.4483	0.834707
BGIBMGA006777	novel protein	2	2	3	1.44587	0.934417
BGIBMGA004399	novel protein	1	1	1	1.44478	0.364126
BGIBMGA004456	novel protein	1	1	2	1.44478	0.441569
BGIBMGA001725	novel protein	4	4	9	1.44453	0.361972
BGIBMGA006196	novel protein	2	2	3	1.4423	0.936947
BGIBMGA003725	novel protein	4	4	10	1.44088	0.998867
BGIBMGA007169	novel protein	1	1	4	1.44081	0.883419
BGIBMGA013157	novel protein	7	81	416	1.43825	0.999056
BGIBMGA003972	novel protein	5	6	35	1.43798	0.999998
BGIBMGA004397	novel protein	3	3	9	1.4344	0.996745
BGIBMGA004740	novel protein	4	4	14	1.43293	0.550547
BGIBMGA008225	novel protein	1	1	1	1.43253	0.682081
BGIBMGA003753	novel protein	3	4	15	1.43146	0.999953
BGIBMGA001483	novel protein	4	14	63	1.42889	0.999755
BGIBMGA006463	novel protein	5	8	14	1.42805	0.94418
BGIBMGA009766	novel protein	1	1	1	1.42605	0.80244
BGIBMGA006414	novel protein	7	41	139	1.42415	0.738787
BGIBMGA008556	novel protein	7	7	23	1.42402	0.574213
BGIBMGA013544	novel protein	2	2	4	1.42254	0.926435
BGIBMGA014456	novel protein	1	2	5	1.4224	0.157574
BGIBMGA014179	novel protein	1	1	2	1.41895	0.917748
BGIBMGA013591	novel protein	1	1	1	1.41864	0.788632
gi_21356159	ran_ isoform A [D.melanogaster]	2	2	6	1.41628	0.999998
gi_45550815	CG13614 [D.melanogaster]	1	1	1	1.41337	0.9385
BGIBMGA010193	novel protein	4	6	17	1.4133	0.962728
BGIBMGA006806	novel protein	1	1	2	1.41206	0.85209
gi_85725022	I[[h]] channel_ isoform B [D.melanogaster]	2	2	2	1.41122	0.793636
BGIBMGA001363	novel protein	3	10	40	1.40982	0.999749
BGIBMGA003187	novel protein	1	1	2	1.40826	0.938617
BGIBMGA003840	novel protein	4	7	33	1.40689	0.989232
gi_17137360	tripeptidyl_peptidase II_ isoform A [D.melanogaster]	1	1	4	1.40596	0.16913
BGIBMGA001830	novel protein	6	7	24	1.40285	0.819943
BGIBMGA001536	novel protein	1	2	7	1.40205	0.231042
BGIBMGA001501	novel protein	2	3	10	1.39242	0.726762
gi_320544995	CG16997 [D.melanogaster]	1	1	1	1.38682	0.541738
BGIBMGA007000	novel protein	2	2	9	1.38303	0.757813
gi_17136504	alpha spectrin [D.melanogaster]	8	11	37	1.38283	0.102191
BGIBMGA004891	novel protein	2	2	4	1.38199	0.937352
BGIBMGA010794	novel protein	6	8	17	1.38171	0.824378
BGIBMGA009374	novel protein	1	1	3	1.38091	0.780977
BGIBMGA008595	novel protein	5	5	21	1.38047	0.993408
BGIBMGA012541	novel protein	3	6	16	1.3779	0.988306
gi_17137000	clathrin heavy chain_ isoform A [D.melanogaster]	12	16	49	1.37666	0.579215
BGIBMGA013098	novel protein	7	8	42	1.37497	0.983568
BGIBMGA001825	novel protein	2	4	13	1.37477	0.99995
gi_114052605	26S proteasome regulatory ATPase subunit 10B [B.mori]	8	11	32	1.36792	0.907799
BGIBMGA006507	novel protein	14	22	131	1.36629	1
BGIBMGA007543	novel protein	1	1	2	1.36551	0.897931
BGIBMGA012983	novel protein	12	14	58	1.36429	0.997865
BGIBMGA002933	novel protein	2	2	4	1.36396	0.968982
BGIBMGA007119	novel protein	4	4	22	1.36184	0.985763
BGIBMGA009699	novel protein	7	10	37	1.36016	0.774715
BGIBMGA013260	novel protein	3	3	20	1.35746	0.952819
BGIBMGA003028	novel protein	5	7	31	1.3485	0.918291
gi_85726398	CG5001 [D.melanogaster]	1	1	2	1.34838	0.998551
BGIBMGA002845	novel protein	1	1	1	1.34583	0.800451
BGIBMGA005117	novel protein	15	19	79	1.34541	0.852136
BGIBMGA002779	novel protein	5	5	7	1.34462	0.464468
BGIBMGA009799	novel protein	1	1	6	1.34452	0.998785
BGIBMGA007639	novel protein	5	6	35	1.3445	0.743534
BGIBMGA013145	novel protein	1	1	2	1.34141	0.934816
BGIBMGA012309	novel protein	8	15	84	1.33984	0.872502
BGIBMGA005014	novel protein	7	8	15	1.33697	0.411912
BGIBMGA008292	novel protein	1	1	1	1.33688	0.83432
BGIBMGA002953	novel protein	10	10	57	1.33666	0.940649
gi_21356837	RhoGDI [D.melanogaster]	1	1	1	1.33615	0.338183
BGIBMGA001525	novel protein	10	12	41	1.33245	0.888815
BGIBMGA009795	novel protein	3	3	7	1.32869	0.898223
BGIBMGA000136	novel protein	1	1	2	1.32837	0.851303
gi_21356559	CG6255 [D.melanogaster]	1	1	1	1.32703	0.812644
gi_114051515	elongation factor Ts [B.mori]	2	2	3	1.32474	0.783993
BGIBMGA011073	novel protein	1	1	3	1.3241	0.982483
BGIBMGA004608	novel protein	12	20	79	1.32172	0.781833
BGIBMGA012151	novel protein	2	2	2	1.31982	0.809448
BGIBMGA010905	novel protein	2	3	8	1.31794	0.892208
gi_28573245	spargel_ isoform B [D.melanogaster]	1	1	1	1.31654	0.730998
BGIBMGA001132	novel protein	1	1	7	1.31616	0.996916
BGIBMGA009690	novel protein	1	1	1	1.31611	0.843531
gi_17136276	Aspartyl_tRNA synthetase [D.melanogaster]	4	6	10	1.31579	0.655043
BGIBMGA011702	novel protein	4	7	19	1.31501	0.938133
BGIBMGA003656	novel protein	6	6	15	1.31367	1
BGIBMGA002894	novel protein	7	8	16	1.31024	0.839608
BGIBMGA009704	novel protein	1	1	10	1.30934	0.999738
BGIBMGA002569	novel protein	7	10	77	1.30887	1
BGIBMGA009380	novel protein	1	1	2	1.30827	0.866198
BGIBMGA013511	novel protein	3	5	26	1.30732	0.989195
BGIBMGA006771	novel protein	1	1	1	1.30386	0.797155
BGIBMGA007941	novel protein	2	2	5	1.30332	0.98533
BGIBMGA007637	novel protein	24	65	372	1.29838	0.996622
BGIBMGA001292	novel protein	1	1	2	1.29753	0.882625
BGIBMGA009851	novel protein	21	26	106	1.29591	0.646488
BGIBMGA014165	novel protein	1	1	3	1.29059	0.97658
gi_114053115	EN protein binding/engrailed nuclear homeoprotein_regulated protein [B.mori]	4	5	9	1.28455	0.997751
gi_24650278	aldolase_ isoform B [D.melanogaster]	1	1	4	1.28061	0.994874
BGIBMGA009706	novel protein	1	1	3	1.27778	0.96908
gi_17647429	fimbrin_ isoform A [D.melanogaster]	3	3	9	1.27754	0.998735
BGIBMGA005812	novel protein	18	58	317	1.27457	0.995449
BGIBMGA008004	novel protein	8	10	45	1.27341	0.0732431
BGIBMGA000809	novel protein	1	1	2	1.27294	0.966379
BGIBMGA011198	novel protein	1	1	1	1.26978	0.817451
BGIBMGA009393	novel protein	6	166	1421	1.26922	0.998302
BGIBMGA004158	novel protein	1	1	2	1.26894	0.927633
BGIBMGA001490	novel protein	11	17	131	1.26856	0.928437
BGIBMGA009248	novel protein	3	3	10	1.26027	0.999999
gi_24649283	CG4434 [D.melanogaster]	2	2	2	1.25843	0.9668
BGIBMGA007107	novel protein	2	3	12	1.25422	0.156427
gi_148298878	vacuolar ATP synthase catalytic subunit A [B.mori]	11	15	44	1.25408	0.330435
BGIBMGA008427	novel protein	1	1	4	1.25363	0.9881
gi_112982798	ribosomal protein L3 [B.mori]	7	13	23	1.24556	1
BGIBMGA014177	novel protein	10	16	69	1.24359	0.999727
gi_45550793	wolfram syndrome 1_ isoform A [D.melanogaster]	1	2	3	1.24321	0.70723
BGIBMGA009208	novel protein	3	5	18	1.24066	0.987184
BGIBMGA013895	novel protein	2	2	3	1.23972	0.585425
BGIBMGA008096	novel protein	1	1	2	1.23864	0.886272
BGIBMGA003493	novel protein	2	2	4	1.23459	0.906381
BGIBMGA013612	novel protein	1	1	1	1.23302	0.881474
BGIBMGA003931	novel protein	1	1	2	1.23302	0.973048
BGIBMGA004956	novel protein	1	2	2	1.23029	0.873717
gi_17647183	beta adaptin [D.melanogaster]	12	14	49	1.22958	0.378556
gi_28573970	CG3420 [D.melanogaster]	1	2	2	1.22832	0.975656
BGIBMGA003136	novel protein	1	1	4	1.22784	0.891575
BGIBMGA011493	novel protein	1	1	3	1.21695	0.992555
BGIBMGA008542	novel protein	2	2	5	1.21197	0.998205
BGIBMGA011770	novel protein	1	1	5	1.21038	0.999746
BGIBMGA010080	novel protein	1	1	1	1.20119	0.896859
BGIBMGA013743	novel protein	5	5	28	1.19694	0.999999
gi_24653270	tripeptidyl_peptidase II_ isoform D [D.melanogaster]	2	3	4	1.19555	0.288479
BGIBMGA009496	novel protein	8	11	37	1.19009	0.760445
BGIBMGA008922	novel protein	8	10	30	1.18894	1
BGIBMGA003601	novel protein	1	1	1	1.18579	0.907829
BGIBMGA003596	novel protein	1	1	3	1.18091	0.996706
gi_24659166	CG3162 [D.melanogaster]	2	2	8	1.17909	0.960244
BGIBMGA002348	novel protein	1	1	3	1.17433	0.994574
gi_112982956	splicing factor arginine/serine_rich 6 [B.mori]	1	1	2	1.17368	1
BGIBMGA013023	novel protein	3	3	17	1.17055	1
BGIBMGA004533	novel protein	2	3	15	1.17031	0.803045
BGIBMGA011884	novel protein	1	1	1	1.16819	0.879672
gi_24641463	CG18130_ isoform A [D.melanogaster]	1	1	1	1.16775	0.83001
BGIBMGA012013	novel protein	2	2	3	1.16431	0.617896
BGIBMGA009132	novel protein	15	35	239	1.16327	0.990775
BGIBMGA009751	novel protein	9	47	206	1.16266	0.999997
BGIBMGA000923	novel protein	1	1	1	1.15982	0.829433
BGIBMGA004711	novel protein	3	3	4	1.1594	0.99687
BGIBMGA000381	novel protein	4	4	7	1.15774	0.99997
BGIBMGA001541	novel protein	1	1	1	1.15568	0.649815
BGIBMGA012520	novel protein	2	2	3	1.15274	0.94959
BGIBMGA001386	novel protein	7	10	36	1.15149	0.745517
gi_21358491	CG13698 [D.melanogaster]	1	1	1	1.14789	0.917933
BGIBMGA006964	novel protein	1	1	2	1.14518	0.983623
BGIBMGA007522	novel protein	1	1	3	1.14312	0.997258
BGIBMGA010847	novel protein	2	2	3	1.13895	0.918433
BGIBMGA014091	novel protein	2	2	3	1.13766	0.707215
BGIBMGA013369	novel protein	5	7	9	1.13765	0.800434
BGIBMGA002818	novel protein	4	4	22	1.1361	1
BGIBMGA013025	novel protein	17	23	88	1.13455	0.495308
BGIBMGA009382	novel protein	1	1	2	1.13312	0.988957
BGIBMGA002790	novel protein	1	2	3	1.13046	0.999283
BGIBMGA002406	novel protein	1	1	2	1.12939	0.975978
BGIBMGA014607	novel protein	2	2	7	1.12715	0.999994
BGIBMGA008984	novel protein	1	2	7	1.12328	0.999996
BGIBMGA008689	novel protein	1	1	1	1.12184	0.93688
BGIBMGA001032	novel protein	2	2	5	1.12141	0.755795
gi_223890174	JAB_MPN domain protein [B.mori]	3	4	7	1.11961	0.983567
BGIBMGA000516	novel protein	2	2	3	1.1187	0.852677
BGIBMGA001700	novel protein	1	1	3	1.11778	0.996565
BGIBMGA012126	novel protein	5	7	22	1.1176	0.677127
BGIBMGA007937	novel protein	2	2	4	1.11752	0.590207
BGIBMGA007518	novel protein	2	2	5	1.11249	0.983088
BGIBMGA001115	novel protein	4	4	10	1.11211	0.977842
gi_114052941	signal sequence receptor beta subunit precursor [B.mori]	2	6	40	1.10775	1
BGIBMGA002013	novel protein	6	6	29	1.10652	0.81069
gi_114050773	short_chain dehydrogenease/reductase_like [B.mori]	4	5	26	1.10427	0.999892
gi_24583049	GDP dissociation inhibitor [D.melanogaster]	2	5	9	1.10425	1
gi_85724810	CG34028 [D.melanogaster]	1	1	1	1.10253	0.926777
BGIBMGA005601	novel protein	2	2	4	1.10155	0.53102
BGIBMGA008596	novel protein	7	9	21	1.10056	0.415216
gi_114051239	cystathionine gamma_lyase [B.mori]	9	11	50	1.09736	1
BGIBMGA008998	novel protein	2	2	11	1.09405	1
gi_24665539	CG9674_ isoform A [D.melanogaster]	6	11	20	1.0939	0.745885
BGIBMGA008310	novel protein	1	1	4	1.09356	0.99948
BGIBMGA004315	novel protein	3	5	15	1.09161	0.554166
BGIBMGA001797	novel protein	1	1	2	1.09146	0.977791
BGIBMGA008983	novel protein	1	1	6	1.09114	0.999999
BGIBMGA009794	novel protein	10	13	51	1.09007	0.61622
gi_21358351	mediator complex subunit 1_ isoform A [D.melanogaster]	1	1	1	1.08815	0.900807
BGIBMGA011631	novel protein	2	2	5	1.08514	0.788858
gi_112984156	ribosomal protein L35A [B.mori]	5	11	32	1.08448	0.915784
BGIBMGA006620	novel protein	2	2	12	1.0831	1
BGIBMGA007451	novel protein	5	5	14	1.08199	0.513688
BGIBMGA013462	novel protein	6	6	20	1.08153	0.470334
gi_24641191	heat shock protein 60_ isoform A [D.melanogaster]	1	1	1	1.07961	0.995613
BGIBMGA007904	novel protein	5	5	17	1.07736	0.867836
BGIBMGA002310	novel protein	21	23	59	1.07132	0.535294
BGIBMGA005593	novel protein	8	9	28	1.07115	0.407504
BGIBMGA009465	novel protein	1	1	1	1.06936	0.962821
BGIBMGA000072	novel protein	9	14	68	1.06907	0.510885
BGIBMGA009885	novel protein	2	2	3	1.06667	0.132637
BGIBMGA006108	novel protein	6	7	14	1.06605	0.99979
BGIBMGA003805	novel protein	1	2	10	1.06186	1
BGIBMGA006139	novel protein	1	1	6	1.06088	0.999702
gi_17865841	alpha_Tubulin at 85E [D.melanogaster]	9	21	121	1.05855	1
BGIBMGA010419	novel protein	1	1	1	1.0561	0.962178
BGIBMGA004929	novel protein	1	2	6	1.05373	0.996883
BGIBMGA010387	novel protein	1	1	2	1.05364	0.99635
gi_24585709	elongation factor 2b_ isoform A [D.melanogaster]	20	85	344	1.05297	0.0735031
BGIBMGA012975	novel protein	4	5	6	1.04482	0.64446
BGIBMGA007728	novel protein	14	19	104	1.04411	1
BGIBMGA007541	novel protein	1	2	5	1.04268	0.607911
BGIBMGA004782	novel protein	11	15	70	1.04229	1
BGIBMGA000596	novel protein	1	1	2	1.03896	1
gi_148298713	putative signal recognition particle 68 kDa protein [B.mori]	9	9	22	1.0381	0.509905
BGIBMGA012935	novel protein	41	49	225	1.0379	0.703787
BGIBMGA006920	novel protein	1	1	2	1.03778	0.995795
BGIBMGA005358	novel protein	4	6	10	1.03693	0.540004
gi_17738151	Tat_binding protein_1 [D.melanogaster]	6	8	14	1.03625	0.999999
BGIBMGA011682	novel protein	1	1	1	1.03423	0.959125
BGIBMGA001551	novel protein	2	3	4	1.03318	0.856533
BGIBMGA010352	novel protein	1	1	4	1.03096	0.999999
BGIBMGA003279	novel protein	3	3	11	1.02865	0.635809
BGIBMGA000467	novel protein	1	1	1	1.02715	0.973934
BGIBMGA002837	novel protein	3	5	23	1.02509	0.999806
BGIBMGA000759	novel protein	1	1	5	1.02321	0.999998
BGIBMGA013133	novel protein	11	12	66	1.0221	0.539303
gi_20129007	CG1637_ isoform C [D.melanogaster]	1	1	1	1.01705	0.991037
BGIBMGA014403	novel protein	1	1	2	1.01436	0.999876
BGIBMGA010751	novel protein	2	4	23	1.01321	0.411218
gi_289629218	coatomer protein complex subunit beta [B.mori]	13	22	116	1.01191	0.827311
gi_45550094	CG5118 [D.melanogaster]	1	1	1	1.00915	0.989716
BGIBMGA006260	novel protein	9	11	45	1.00752	0.962924
gi_114052156	thioredoxin family Trp26 [B.mori]	1	1	1	1.00642	0.994061
BGIBMGA013902	novel protein	1	1	2	1.00462	0.999959
gi_20130403	Tudor_SN [D.melanogaster]	1	1	1	1.00263	0.998531
BGIBMGA001859	novel protein	1	1	1	1	0.192042
BGIBMGA014196	novel protein	1	1	9	0.992112	1
BGIBMGA013144	novel protein	2	2	4	0.98922	0.997776
BGIBMGA003158	novel protein	1	1	6	0.988962	1
BGIBMGA001415	novel protein	2	2	18	0.987465	0.998339
BGIBMGA014217	novel protein	3	3	15	0.985788	0.999868
BGIBMGA011372	novel protein	2	3	8	0.984875	0.988586
BGIBMGA014412	novel protein	2	2	3	0.983773	0.596083
BGIBMGA012953	novel protein	2	2	11	0.978961	0.999994
BGIBMGA002460	novel protein	1	1	1	0.977842	0.97009
BGIBMGA012240	novel protein	10	10	23	0.973378	0.425126
BGIBMGA000140	novel protein	1	2	3	0.971248	0.988364
BGIBMGA011891	novel protein	1	1	1	0.96911	0.98255
BGIBMGA013536	novel protein	4	5	13	0.962689	0.997417
BGIBMGA009249	novel protein	4	5	11	0.962559	1
BGIBMGA000404	novel protein	3	3	11	0.962255	0.999785
gi_24649466	Glutamyl_prolyl_tRNA synthetase_ isoform A [D.melanogaster]	2	2	5	0.959893	0.665014
BGIBMGA007512	novel protein	8	8	34	0.957484	0.384869
BGIBMGA004056	novel protein	2	2	4	0.95384	0.987522
BGIBMGA012852	novel protein	1	1	1	0.947917	0.962988
BGIBMGA002620	novel protein	2	3	5	0.946473	0.773052
BGIBMGA014207	novel protein	1	1	3	0.944983	0.999033
BGIBMGA008168	novel protein	6	6	20	0.944078	0.232463
BGIBMGA003916	novel protein	1	1	2	0.941659	0.997823
BGIBMGA012570	novel protein	1	1	1	0.940819	0.96534
gi_112983503	beta_tubulin [B.mori]	14	33	168	0.938822	1
BGIBMGA005287	novel protein	1	1	5	0.93744	0.999995
BGIBMGA001119	novel protein	18	27	192	0.93666	0.693569
BGIBMGA013365	novel protein	1	1	1	0.936255	0.950512
gi_24645350	beta_Tubulin at 85D [D.melanogaster]	12	25	178	0.932686	1
BGIBMGA011982	novel protein	5	5	6	0.931345	0.423043
BGIBMGA012046	novel protein	5	5	9	0.930422	0.79948
BGIBMGA013343	novel protein	6	6	31	0.930212	0.530943
BGIBMGA010178	novel protein	4	5	21	0.928361	0.977671
BGIBMGA004644	novel protein	1	1	6	0.92251	0.999962
BGIBMGA009660	novel protein	3	3	8	0.922258	0.874725
BGIBMGA010941	novel protein	15	21	96	0.919343	0.361466
BGIBMGA010792	novel protein	3	3	3	0.916784	0.743212
BGIBMGA013232	novel protein	1	1	2	0.916081	0.994873
BGIBMGA001644	novel protein	10	13	35	0.915964	0.611487
BGIBMGA013717	novel protein	19	33	208	0.91575	0.416191
gi_24655737	beta_Tubulin at 56D_ isoform B [D.melanogaster]	14	31	215	0.915014	1
BGIBMGA000104	novel protein	6	6	19	0.914629	0.500397
BGIBMGA003442	novel protein	10	19	89	0.909555	1
BGIBMGA003330	novel protein	2	3	23	0.908217	1
BGIBMGA010232	novel protein	1	1	4	0.905622	0.999481
BGIBMGA012388	novel protein	2	2	3	0.904977	0.66032
BGIBMGA007640	novel protein	1	1	1	0.901956	0.851718
BGIBMGA007756	novel protein	1	1	2	0.89736	0.956464
BGIBMGA002423	novel protein	3	3	6	0.89631	0.804869
BGIBMGA011337	novel protein	2	2	2	0.889412	0.78775
BGIBMGA008226	novel protein	8	11	26	0.889216	0.657432
gi_24646135	Heat_shock_protein_70Aa [D.melanogaster]	3	3	10	0.888849	0.980363
BGIBMGA000324	novel protein	1	1	1	0.888218	0.885501
BGIBMGA000207	novel protein	6	8	12	0.887302	0.846639
BGIBMGA002814	novel protein	8	9	63	0.887028	1
BGIBMGA001194	novel protein	11	15	35	0.885688	0.587852
gi_24653664	lamin C [D.melanogaster]	1	1	2	0.885419	0.942986
gi_20129315	CG5261_ isoform B [D.melanogaster]	1	1	1	0.885142	0.932295
BGIBMGA006976	novel protein	2	3	4	0.876774	0.845104
BGIBMGA009780	novel protein	5	6	19	0.872468	0.861277
BGIBMGA006941	novel protein	8	9	54	0.872401	1
BGIBMGA007869	novel protein	13	16	69	0.872112	0.683658
BGIBMGA009895	novel protein	3	3	3	0.871719	0.582864
BGIBMGA001131	novel protein	2	2	2	0.871536	0.984798
BGIBMGA013427	novel protein	1	1	1	0.870901	0.917286
BGIBMGA000546	novel protein	2	3	6	0.869639	0.999999
gi_17737635	reptin [D.melanogaster]	1	1	1	0.86774	0.889888
gi_153791621	acetoacetyl_CoA thiolase [B.mori]	2	3	7	0.865664	0.631896
BGIBMGA013316	novel protein	1	1	1	0.865136	0.885009
BGIBMGA007205	novel protein	1	1	3	0.864701	0.997593
BGIBMGA001828	novel protein	11	12	40	0.863964	0.920511
BGIBMGA011092	novel protein	2	2	8	0.863747	0.929362
BGIBMGA002543	novel protein	1	1	3	0.863678	0.995101
BGIBMGA002346	novel protein	3	3	20	0.863363	0.999999
BGIBMGA006828	novel protein	7	9	37	0.862493	0.998855
gi_17737741	thioredoxin reductase 2 [D.melanogaster]	1	1	4	0.857506	0.99949
BGIBMGA012107	novel protein	1	1	1	0.856741	0.914848
gi_309384285	kinesin_like protein a [B.mori]	1	1	2	0.855625	0.90943
BGIBMGA002750	novel protein	7	8	13	0.852213	0.996742
BGIBMGA004852	novel protein	15	19	74	0.850993	0.954241
BGIBMGA011674	novel protein	22	25	64	0.850173	0.984646
gi_24646446	C_terminal binding protein_ isoform A [D.melanogaster]	1	1	4	0.849853	0.999375
BGIBMGA014046	novel protein	6	6	21	0.847193	0.412378
gi_114052643	nuclear migration protein nudC [B.mori]	5	6	10	0.846997	0.999998
BGIBMGA001683	novel protein	5	7	34	0.839432	1
BGIBMGA000206	novel protein	5	7	29	0.838233	0.268758
BGIBMGA006957	novel protein	1	1	1	0.834612	0.897235
gi_19923034	Sac1_ isoform A [D.melanogaster]	1	1	6	0.833392	0.26928
BGIBMGA010088	novel protein	6	6	17	0.831028	0.895475
BGIBMGA006215	novel protein	1	1	4	0.825608	0.998426
BGIBMGA006134	novel protein	6	7	9	0.820777	0.630816
BGIBMGA009138	novel protein	10	13	72	0.819881	0.999999
BGIBMGA007601	novel protein	14	15	67	0.818531	0.999812
gi_45550410	CG7741 [D.melanogaster]	1	1	1	0.812596	0.815307
BGIBMGA007513	novel protein	1	1	1	0.812387	0.867943
BGIBMGA000288	novel protein	5	5	23	0.811811	0.985802
BGIBMGA007672	novel protein	1	1	1	0.809236	0.798379
BGIBMGA009045	novel protein	6	6	13	0.808055	0.285786
BGIBMGA002295	novel protein	5	6	21	0.805572	0.787787
gi_114051461	nascent polypeptide associated complex protein alpha subunit [B.mori]	8	12	47	0.804544	0.908457
gi_17137740	proteasome p44.5 subunit_ isoform B [D.melanogaster]	1	2	2	0.800615	0.813675
BGIBMGA008493	novel protein	1	1	5	0.799418	0.999287
gi_20129479	CG5075 [D.melanogaster]	1	2	5	0.799417	0.700746
gi_24583992	Vha68_1 [D.melanogaster]	1	1	3	0.799417	0.700746
BGIBMGA004603	novel protein	10	21	151	0.799367	1
BGIBMGA000930	novel protein	2	2	2	0.796337	0.451813
gi_24762816	zipper_ isoform A [D.melanogaster]	4	5	20	0.794682	0.8024
gi_113676411	heat shock protein 70 [B.mori]	1	1	1	0.794396	0.932864
BGIBMGA004542	novel protein	6	8	19	0.79361	1
BGIBMGA004691	novel protein	11	11	40	0.792584	0.151562
BGIBMGA005412	novel protein	4	4	6	0.790845	0.89419
BGIBMGA000321	novel protein	1	1	2	0.787454	0.999755
gi_85816228	CG6664_ isoform D [D.melanogaster]	1	1	4	0.787454	0.999755
BGIBMGA011577	novel protein	2	2	6	0.787101	0.513782
BGIBMGA008725	novel protein	10	12	48	0.785652	0.996742
BGIBMGA011482	novel protein	6	6	16	0.785595	0.676666
BGIBMGA007325	novel protein	6	6	8	0.775316	0.747426
BGIBMGA005499	novel protein	1	1	1	0.775298	0.890397
BGIBMGA008336	novel protein	1	1	1	0.774832	0.860785
BGIBMGA000475	novel protein	6	9	44	0.773698	0.999999
gi_221330595	drongo_ isoform E [D.melanogaster]	1	1	2	0.769595	0.925113
gi_19921000	CG4389_ isoform A [D.melanogaster]	1	1	3	0.768939	0.890349
gi_114052402	eukaryotic translation termination factor 1 [B.mori]	8	12	61	0.767983	1
BGIBMGA014398	novel protein	6	9	24	0.763532	1
gi_24641760	CG1640_ isoform A [D.melanogaster]	2	3	12	0.763457	0.439925
BGIBMGA010638	novel protein	1	1	10	0.76185	0.999991
BGIBMGA011402	novel protein	1	1	1	0.760845	0.853582
BGIBMGA012380	novel protein	2	2	3	0.760814	0.878283
BGIBMGA013447	novel protein	1	1	1	0.759203	0.942145
gi_24646611	rasputin_ isoform B [D.melanogaster]	1	1	1	0.759203	0.942145
BGIBMGA003184	novel protein	2	2	3	0.754112	0.956482
gi_17647191	beta spectrin [D.melanogaster]	8	9	26	0.748961	0.52187
gi_148298695	poly A binding protein [B.mori]	16	24	133	0.747492	0.698159
BGIBMGA009992	novel protein	11	12	43	0.746608	0.780897
BGIBMGA012532	novel protein	4	4	15	0.743017	0.999523
BGIBMGA004706	novel protein	7	8	36	0.741467	0.98532
gi_112983366	protein disulfide_isomerase like protein ERp57 precursor [B.mori]	15	19	89	0.741163	0.972413
BGIBMGA000894	novel protein	3	4	8	0.740697	0.743602
BGIBMGA003806	novel protein	4	4	8	0.740149	0.622112
gi_24638766	ATP synthase_beta_ isoform A [D.melanogaster]	15	108	446	0.739737	0.998635
BGIBMGA007413	novel protein	1	1	3	0.739573	0.946644
BGIBMGA007864	novel protein	1	1	1	0.736477	0.800886
BGIBMGA007072	novel protein	1	1	1	0.735225	0.781552
BGIBMGA013537	novel protein	4	6	29	0.732585	0.999976
gi_21356433	eukaryotic release factor 1_ isoform A [D.melanogaster]	5	8	48	0.73079	1
BGIBMGA004337	novel protein	1	1	3	0.729144	0.980596
BGIBMGA006358	novel protein	1	1	1	0.7291	0.76833
BGIBMGA005168	novel protein	10	12	39	0.724756	0.204068
BGIBMGA000980	novel protein	1	1	5	0.722105	0.735313
BGIBMGA002548	novel protein	1	1	6	0.719254	0.985575
BGIBMGA009590	novel protein	4	4	7	0.718911	0.423735
BGIBMGA006655	novel protein	1	1	1	0.717911	0.765821
gi_24648872	CG6439_ isoform A [D.melanogaster]	1	1	2	0.715286	0.99815
BGIBMGA007905	novel protein	3	3	6	0.702535	0.673293
BGIBMGA011794	novel protein	2	2	2	0.700279	0.776168
gi_17136248	eukaryotic initiation factor 4a_ isoform C [D.melanogaster]	4	4	12	0.699972	0.995591
BGIBMGA010139	novel protein	4	10	58	0.698084	0.614396
gi_24654883	CG30114 [D.melanogaster]	1	1	1	0.694203	0.78094
BGIBMGA009322	novel protein	1	1	1	0.693909	0.703918
gi_350536779	Fanconi anemia_ complementation group D2 [B.mori]	1	1	1	0.693758	0.792108
BGIBMGA001801	novel protein	2	2	2	0.693562	0.766818
BGIBMGA004672	novel protein	3	3	3	0.69291	0.961109
BGIBMGA000382	novel protein	1	1	4	0.689128	0.988628
BGIBMGA010840	novel protein	9	9	44	0.684031	0.4696
BGIBMGA005628	novel protein	13	17	74	0.683954	1
BGIBMGA010711	novel protein	1	1	1	0.678601	0.782945
gi_17647949	signal recognition particle protein 54k [D.melanogaster]	4	5	30	0.676515	0.999886
BGIBMGA000505	novel protein	2	2	4	0.672416	0.233456
BGIBMGA003151	novel protein	2	2	2	0.671757	0.677111
BGIBMGA011215	novel protein	1	1	1	0.670283	0.74568
BGIBMGA006043	novel protein	1	2	2	0.669982	0.685538
BGIBMGA006832	novel protein	2	3	8	0.669286	0.770573
BGIBMGA013072	novel protein	6	8	26	0.666939	0.996642
BGIBMGA003717	novel protein	5	6	14	0.666665	0.67491
BGIBMGA007082	novel protein	1	1	1	0.666031	0.99859
gi_17136622	heterogeneous nuclear ribonucleoprotein at 87F_ isoform B [D.melanogaster]	1	1	2	0.664492	0.998969
BGIBMGA006850	novel protein	4	4	14	0.661866	0.999929
BGIBMGA006085	novel protein	10	14	46	0.656016	0.506706
BGIBMGA001152	novel protein	1	1	2	0.655411	0.0559631
BGIBMGA004980	novel protein	6	6	14	0.654922	0.957109
BGIBMGA006980	novel protein	1	1	2	0.65088	0.900416
BGIBMGA005441	novel protein	1	1	1	0.648625	0.154534
gi_112983138	phenol UDP_glucosyltransferase precursor [B.mori]	4	4	10	0.647848	0.994761
gi_24646914	CG7362 [D.melanogaster]	1	1	6	0.645191	0.99475
BGIBMGA003038	novel protein	10	10	22	0.645187	0.135667
gi_148298791	signal recognition particle 14 kDa protein_like protein [B.mori]	1	1	2	0.644152	0.851302
gi_242376516	enterobacteria phage T7 RNA polymerase [Escherichia coli BL21(DE3)]	1	1	2	0.641954	0.818134
BGIBMGA010839	novel protein	3	3	6	0.641947	0.966382
gi_281361625	CG42505 [D.melanogaster]	1	1	1	0.640369	0.770705
BGIBMGA001748	novel protein	4	4	10	0.640346	0.99467
BGIBMGA000648	novel protein	1	1	4	0.639801	0.976654
gi_24581334	CG17259 [D.melanogaster]	4	5	22	0.639585	1
gi_62861970	verthandi [D.melanogaster]	1	1	1	0.637098	0.699119
BGIBMGA007502	novel protein	15	21	131	0.634035	0.566662
gi_21358017	CG11837 [D.melanogaster]	1	1	1	0.630532	0.344095
gi_17648041	Trip1 [D.melanogaster]	1	1	1	0.630053	0.969504
BGIBMGA014040	novel protein	6	6	14	0.626543	0.31197
BGIBMGA000120	novel protein	1	1	1	0.626043	0.73339
BGIBMGA013499	novel protein	3	3	12	0.625389	0.99513
gi_24661332	CG5144 [D.melanogaster]	1	1	3	0.623896	0.870565
BGIBMGA005763	novel protein	1	1	2	0.623757	0.742017
BGIBMGA011619	novel protein	1	1	1	0.622166	0.652252
BGIBMGA001929	novel protein	2	3	8	0.61976	0.731006
gi_56311435	calcineurin A at 14F_ isoform A [D.melanogaster]	2	2	3	0.618533	0.980194
BGIBMGA004857	novel protein	1	1	2	0.618489	0.889668
BGIBMGA003973	novel protein	3	4	8	0.617513	0.645688
BGIBMGA012627	novel protein	3	3	8	0.616568	0.43714
BGIBMGA010687	novel protein	2	2	6	0.615817	0.972685
gi_24658015	dynein heavy chain 64C_ isoform A [D.melanogaster]	4	4	5	0.615192	0.616167
gi_24581262	overgrown hematopoietic organs at 23B_ isoform A [D.melanogaster]	1	2	3	0.614251	0.996885
BGIBMGA001470	novel protein	1	1	1	0.613339	0.585709
gi_114052971	FK506_binding protein [B.mori]	1	1	2	0.611773	0.856961
BGIBMGA007842	novel protein	1	1	1	0.60416	0.68938
BGIBMGA011087	novel protein	2	2	5	0.602533	0.592387
BGIBMGA012182	novel protein	15	19	102	0.601932	0.73147
gi_45549019	dre4_ isoform A [D.melanogaster]	1	1	1	0.599256	0.527226
gi_148298796	thioredoxin_like protein [B.mori]	2	2	5	0.598618	0.846367
BGIBMGA003962	novel protein	1	1	1	0.596992	0.698172
gi_28571947	calcineurin A1 [D.melanogaster]	1	1	1	0.595425	0.886405
BGIBMGA012412	novel protein	1	2	3	0.595411	0.881745
BGIBMGA007516	novel protein	10	145	273	0.594884	0.23482
BGIBMGA000367	novel protein	1	1	3	0.594306	0.913475
BGIBMGA007594	novel protein	7	7	13	0.594069	0.674332
BGIBMGA004655	novel protein	2	3	6	0.588574	0.244032
BGIBMGA005738	novel protein	3	3	4	0.588563	0.7125
BGIBMGA013076	novel protein	1	1	2	0.585718	0.208715
BGIBMGA001542	novel protein	2	2	5	0.583013	0.687575
BGIBMGA014157	novel protein	5	8	16	0.581758	0.773372
BGIBMGA005736	novel protein	6	8	19	0.580926	0.62015
BGIBMGA002604	novel protein	4	4	12	0.580301	0.989474
gi_24641090	stress_sensitive B_ isoform C [D.melanogaster]	1	1	2	0.579832	0.996029
BGIBMGA007299	novel protein	1	1	4	0.576326	0.949412
BGIBMGA005552	novel protein	5	7	11	0.575369	0.771821
BGIBMGA010475	novel protein	9	10	30	0.571487	0.977462
gi_28558748	CG31999 [D.melanogaster]	1	1	1	0.571467	0.723667
BGIBMGA006552	novel protein	1	1	1	0.570529	0.715763
BGIBMGA004010	novel protein	2	2	3	0.569088	0.604144
BGIBMGA001265	novel protein	10	11	32	0.567135	0.581551
gi_24650935	Cullin_5 [D.melanogaster]	1	1	1	0.565378	0.687675
BGIBMGA001223	novel protein	6	8	16	0.561324	0.996521
BGIBMGA013245	novel protein	2	2	4	0.557015	0.886337
BGIBMGA007137	novel protein	1	1	2	0.556052	0.83519
gi_24645339	ribosomal protein L34b_ isoform A [D.melanogaster]	1	3	7	0.554817	0.804778
BGIBMGA004993	novel protein	12	15	64	0.554651	0.999041
BGIBMGA006426	novel protein	2	3	20	0.554503	0.99959
BGIBMGA004421	novel protein	1	1	1	0.554469	0.68665
gi_112984118	ribosomal protein L39 [B.mori]	1	2	7	0.553597	0.158398
BGIBMGA007265	novel protein	1	1	1	0.55281	0.69259
gi_24762435	CG13562_ isoform A [D.melanogaster]	1	1	1	0.551928	0.520711
BGIBMGA014536	novel protein	5	15	77	0.551746	0.576784
BGIBMGA000753	novel protein	2	2	4	0.549996	0.602569
gi_18858079	CG2263 [D.melanogaster]	1	1	2	0.547244	0.70844
BGIBMGA003718	novel protein	3	7	48	0.546545	0.404165
BGIBMGA003362	novel protein	3	4	11	0.545617	0.971866
gi_114052545	chaperonin subunit 4 delta [B.mori]	3	4	7	0.542203	0.99999
BGIBMGA002096	novel protein	1	1	1	0.540035	0.405894
gi_114051996	nonclathrin coat protein zeta 1_COP [B.mori]	1	1	3	0.537781	0.857553
BGIBMGA011477	novel protein	8	9	40	0.536891	0.986842
BGIBMGA008295	novel protein	15	19	68	0.536694	0.244176
BGIBMGA007517	novel protein	6	6	16	0.536122	0.788026
BGIBMGA010666	novel protein	6	8	39	0.535529	0.999999
BGIBMGA011180	novel protein	17	19	49	0.53468	0.358051
gi_24641071	raspberry_ isoform A [D.melanogaster]	1	1	2	0.531168	0.844267
BGIBMGA002360	novel protein	1	1	3	0.530127	0.955235
gi_114051355	WD repeat domain 61 [B.mori]	1	1	1	0.530127	0.955235
gi_306518654	UDP_glucosyltransferase precursor [B.mori]	12	15	44	0.530059	0.999992
BGIBMGA009121	novel protein	1	1	1	0.528387	0.700526
BGIBMGA009395	novel protein	1	1	6	0.528125	0.976751
BGIBMGA009941	novel protein	9	10	28	0.527961	0.538672
BGIBMGA002296	novel protein	2	2	10	0.527642	0.897165
BGIBMGA001926	novel protein	1	1	3	0.525856	0.884223
BGIBMGA002237	novel protein	9	13	34	0.524618	0.901493
BGIBMGA001662	novel protein	1	1	1	0.524606	0.515714
gi_281359858	CG4041 [D.melanogaster]	1	1	1	0.521381	0.483817
gi_112983006	acyl_coenzyme A dehydrogenase [B.mori]	6	6	11	0.519356	0.797357
BGIBMGA009874	novel protein	10	13	53	0.519143	0.651177
BGIBMGA012560	novel protein	6	6	15	0.518234	0.931719
BGIBMGA012128	novel protein	1	1	1	0.518052	0.666523
BGIBMGA006173	novel protein	5	6	14	0.516996	0.961706
BGIBMGA005124	novel protein	2	2	2	0.514825	0.267312
BGIBMGA006103	novel protein	6	8	13	0.514681	0.835527
BGIBMGA007438	novel protein	1	1	4	0.514671	0.929623
BGIBMGA001547	novel protein	3	3	8	0.514576	0.378298
gi_221329961	CG12507 [D.melanogaster]	1	1	1	0.51376	0.689671
BGIBMGA006878	novel protein	3	4	10	0.512815	0.782909
BGIBMGA005426	novel protein	4	4	28	0.510101	0.774935
BGIBMGA011019	novel protein	5	6	19	0.509715	0.531845
gi_114053311	26S protease regulatory subunit 6B [B.mori]	8	10	37	0.508288	0.998071
gi_24656137	CG9090 [D.melanogaster]	1	1	2	0.508189	0.0383075
gi_24664191	mitochondrial phosphate carrier protein_ isoform A [D.melanogaster]	1	1	2	0.508189	0.0383075
BGIBMGA010785	novel protein	3	3	8	0.50767	0.729106
BGIBMGA006246	novel protein	1	1	1	0.507132	0.38193
BGIBMGA000806	novel protein	2	2	5	0.504746	0.240214
BGIBMGA010289	novel protein	12	15	42	0.502861	0.816471
gi_17647657	Mo25 [D.melanogaster]	2	2	5	0.502079	0.849168
BGIBMGA000229	novel protein	2	2	5	0.50192	0.807989
BGIBMGA004096	novel protein	1	1	1	0.498652	0.65599
BGIBMGA007909	novel protein	1	1	1	0.498423	0.608097
BGIBMGA012093	novel protein	1	1	1	0.497341	0.618741
BGIBMGA011281	novel protein	1	1	1	0.497294	0.646159
gi_221468773	CG34038 [D.melanogaster]	1	1	1	0.497294	0.646159
gi_24642639	tweedlealpha [D.melanogaster]	1	1	1	0.497294	0.646159
BGIBMGA007460	novel protein	2	2	4	0.496556	0.887692
gi_22026942	CG5431_ isoform A [D.melanogaster]	1	5	5	0.495586	0.937128
BGIBMGA005570	novel protein	1	1	2	0.495236	0.635815
BGIBMGA007114	novel protein	8	8	26	0.492272	0.886857
BGIBMGA002492	novel protein	1	1	2	0.491012	0.730895
gi_24645179	Tcp_1eta [D.melanogaster]	3	3	7	0.491011	0.999945
gi_162952017	Annexin IX isoform C [B.mori]	6	6	11	0.490559	0.999375
BGIBMGA000540	novel protein	1	1	2	0.490013	0.660359
BGIBMGA013773	novel protein	1	2	6	0.487255	0.944972
BGIBMGA004688	novel protein	13	14	60	0.48709	0.818243
BGIBMGA003908	novel protein	2	2	3	0.485672	0.832067
BGIBMGA013658	novel protein	1	1	1	0.484712	0.3577
gi_320544855	CG31755 [D.melanogaster]	1	1	1	0.484644	0.656607
BGIBMGA003196	novel protein	1	1	6	0.483608	0.947416
BGIBMGA001197	novel protein	3	3	8	0.480807	0.505311
BGIBMGA004939	novel protein	2	3	7	0.47865	0.602671
BGIBMGA002152	novel protein	1	2	2	0.478329	0.638771
gi_17864608	lethal (2) 35Df [D.melanogaster]	1	1	1	0.478222	0.478366
BGIBMGA003490	novel protein	1	1	1	0.477385	0.0210246
gi_114052408	mitochondrial aldehyde dehydrogenase [B.mori]	6	6	48	0.476732	0.999995
BGIBMGA007121	novel protein	12	14	75	0.476708	0.994561
BGIBMGA005636	novel protein	1	1	1	0.476305	0.491118
BGIBMGA000126	novel protein	1	1	2	0.47269	0.571024
BGIBMGA001372	novel protein	2	2	4	0.47163	0.702149
BGIBMGA014133	novel protein	3	3	4	0.471385	0.749934
BGIBMGA005536	novel protein	2	2	6	0.470221	0.366083
BGIBMGA011511	novel protein	2	2	2	0.469688	0.637711
BGIBMGA002355	novel protein	8	10	69	0.469673	0.85718
BGIBMGA012569	novel protein	1	1	2	0.468328	0.754362
BGIBMGA005068	novel protein	6	6	24	0.466744	0.755124
BGIBMGA011642	novel protein	1	1	2	0.465685	0.790561
BGIBMGA001739	novel protein	1	1	2	0.463278	0.603569
BGIBMGA011274	novel protein	2	2	2	0.463111	0.527788
BGIBMGA005965	novel protein	9	9	30	0.462735	0.356214
BGIBMGA006841	novel protein	1	1	8	0.461432	0.886375
BGIBMGA001874	novel protein	2	2	2	0.461231	0.94649
gi_24649014	AP_50_ isoform A [D.melanogaster]	2	2	2	0.461224	0.746275
BGIBMGA009805	novel protein	1	1	3	0.461081	0.844064
gi_19921728	CG11107 [D.melanogaster]	2	3	18	0.459331	0.954556
BGIBMGA010635	novel protein	3	3	9	0.456965	0.510454
gi_62472846	slowpoke_ isoform M [D.melanogaster]	1	1	1	0.454597	0.216092
BGIBMGA005498	novel protein	2	2	3	0.454054	0.76707
BGIBMGA009835	novel protein	2	2	2	0.451352	0.535895
BGIBMGA006933	novel protein	1	1	1	0.45074	0.417334
BGIBMGA002816	novel protein	1	1	2	0.450357	0.523257
BGIBMGA007120	novel protein	2	2	5	0.449736	0.796394
gi_28574878	CG6512_ isoform A [D.melanogaster]	1	1	2	0.448189	0.638666
BGIBMGA006263	novel protein	9	13	46	0.446701	0.767672
BGIBMGA010944	novel protein	1	1	1	0.445629	0.638123
BGIBMGA007410	novel protein	6	6	15	0.444968	0.950507
BGIBMGA010739	novel protein	11	15	82	0.444892	0.94605
gi_148298736	annexin isoform 1 [B.mori]	1	1	3	0.443483	0.770616
BGIBMGA003822	novel protein	2	2	3	0.441229	0.667872
BGIBMGA006193	novel protein	1	1	2	0.439115	0.76233
gi_19921908	CG8801 [D.melanogaster]	1	1	4	0.438853	0.743211
gi_18860063	Rpt3 [D.melanogaster]	4	4	8	0.434519	0.970222
BGIBMGA008930	novel protein	20	21	73	0.432864	0.147629
BGIBMGA001726	novel protein	3	3	10	0.43148	0.11367
BGIBMGA013010	novel protein	1	1	2	0.429473	0.735767
BGIBMGA000474	novel protein	3	3	10	0.429324	0.708537
BGIBMGA005876	novel protein	4	4	5	0.426916	0.281762
gi_24649832	CG11089_ isoform A [D.melanogaster]	2	2	10	0.425722	0.68903
gi_24666109	CG32191 [D.melanogaster]	1	2	4	0.425525	0.0949756
gi_17737731	ribosomal protein LP0 [D.melanogaster]	1	1	2	0.424966	0.985003
gi_281363473	ATP citrate lyase_ isoform D [D.melanogaster]	1	1	1	0.424366	0.603718
gi_221331102	CG6938 [D.melanogaster]	1	1	1	0.423312	0.616424
gi_62862022	Glutamine:fructose_6_phosphate aminotransferase 1_ isoform D [D.melanogaster]	1	1	2	0.420953	0.673293
BGIBMGA004807	novel protein	1	1	4	0.420145	0.728345
gi_17647581	lark_ isoform A [D.melanogaster]	1	1	4	0.419244	0.952539
BGIBMGA009901	novel protein	1	1	3	0.415174	0.810635
BGIBMGA005270	novel protein	3	4	20	0.414958	0.0853251
gi_24645909	CG5214 [D.melanogaster]	2	2	6	0.412355	0.939697
gi_24666493	UDP_glucose_glycoprotein glucosyltransferase [D.melanogaster]	1	1	1	0.411944	0.48961
BGIBMGA014271	novel protein	1	1	2	0.410829	0.717321
BGIBMGA000757	novel protein	6	6	13	0.410727	0.653587
BGIBMGA005040	novel protein	1	1	1	0.409857	0.570539
gi_324073393	ovarian tumor protein [B.mori]	1	1	1	0.40935	0.602723
gi_17137608	alpha_coatomer protein_ isoform A [D.melanogaster]	6	8	60	0.407431	0.0519053
BGIBMGA012967	novel protein	3	3	7	0.407378	0.591946
gi_114326261	PTB_associated splicing factor [B.mori]	3	3	4	0.406903	0.720458
BGIBMGA003702	novel protein	3	3	8	0.406219	0.83164
BGIBMGA009430	novel protein	4	4	12	0.405992	0.897917
gi_17864292	aconitase_ isoform B [D.melanogaster]	3	4	23	0.404343	0.857061
BGIBMGA007622	novel protein	7	7	14	0.402828	0.482055
BGIBMGA001616	novel protein	1	1	2	0.401361	0.678682
BGIBMGA009981	novel protein	3	4	22	0.400092	0.95055
BGIBMGA014558	novel protein	1	1	1	0.399753	0.463929
gi_114052272	tropomyosin_2 isoform 2 [B.mori]	2	2	2	0.398831	0.713002
BGIBMGA004919	novel protein	1	1	1	0.397286	0.0765923
BGIBMGA001842	novel protein	13	14	93	0.396964	0.263425
gi_19920676	Trehalose_6_phosphate synthase 1 [D.melanogaster]	1	1	1	0.396451	0.471936
BGIBMGA000188	novel protein	1	1	1	0.39476	0.262147
BGIBMGA001165	novel protein	2	2	5	0.393957	0.621846
BGIBMGA004963	novel protein	1	1	3	0.39376	0.524766
BGIBMGA009779	novel protein	8	8	27	0.393447	0.161942
BGIBMGA006506	novel protein	1	1	1	0.393278	0.482326
BGIBMGA008706	novel protein	5	5	14	0.392314	0.945915
BGIBMGA007162	novel protein	2	2	2	0.392296	0.394465
BGIBMGA002361	novel protein	1	1	1	0.392171	0.590434
BGIBMGA007401	novel protein	1	1	4	0.391197	0.533403
BGIBMGA011793	novel protein	1	1	1	0.38932	0.39277
gi_21357653	widerborst_ isoform C [D.melanogaster]	2	2	3	0.388721	0.439407
BGIBMGA001475	novel protein	1	1	1	0.387029	0.473462
BGIBMGA003901	novel protein	6	30	187	0.385774	0.99932
gi_24657265	Ras opposite [D.melanogaster]	1	1	1	0.384538	0.373123
BGIBMGA003112	novel protein	1	1	4	0.382895	0.552487
BGIBMGA009900	novel protein	1	1	2	0.382018	0.720299
BGIBMGA006235	novel protein	1	1	3	0.381708	0.428798
BGIBMGA010388	novel protein	1	1	1	0.380606	0.609484
gi_116008116	calnexin 99A_ isoform C [D.melanogaster]	1	1	1	0.380232	0.488863
BGIBMGA001168	novel protein	1	1	2	0.379558	0.577473
BGIBMGA009888	novel protein	1	1	2	0.379493	0.378399
BGIBMGA007790	novel protein	1	1	2	0.377544	0.414965
BGIBMGA007912	novel protein	3	3	10	0.377423	0.839948
gi_19920728	Rpn11 [D.melanogaster]	2	2	6	0.37593	0.845406
BGIBMGA002830	novel protein	2	2	3	0.375614	0.461896
BGIBMGA000950	novel protein	1	1	1	0.374297	0.395484
BGIBMGA010595	novel protein	5	6	32	0.373955	0.983849
BGIBMGA008051	novel protein	6	8	21	0.373614	0.142012
BGIBMGA009674	novel protein	2	2	3	0.373508	0.513807
gi_17136444	RNA polymerase II 140kD subunit [D.melanogaster]	1	1	1	0.373401	0.498641
BGIBMGA011040	novel protein	1	1	4	0.37266	0.822527
gi_320544010	Stretchin_Mlck_ isoform H [D.melanogaster]	1	1	1	0.371039	0.3727
gi_18079297	hexokinase A_ isoform A [D.melanogaster]	2	3	14	0.370959	0.984709
BGIBMGA004241	novel protein	5	5	24	0.369978	0.582948
BGIBMGA003539	novel protein	3	3	5	0.367105	0.382672
BGIBMGA009207	novel protein	10	10	28	0.365775	0.329952
BGIBMGA003207	novel protein	2	2	4	0.362944	0.331877
BGIBMGA000230	novel protein	1	1	1	0.362534	0.494717
gi_19922458	eIF3_S9_ isoform B [D.melanogaster]	1	1	3	0.362063	0.532603
BGIBMGA010559	novel protein	2	2	2	0.361032	0.550613
gi_24653595	heat shock protein cognate 5 [D.melanogaster]	2	2	14	0.360117	0.553501
BGIBMGA005648	novel protein	2	3	8	0.358701	0.859719
gi_114053109	endothelial_monocyte activating polypeptide II [B.mori]	1	1	2	0.358533	0.909733
BGIBMGA013996	novel protein	3	3	5	0.353283	0.993696
gi_28574560	CG5389 [D.melanogaster]	1	3	17	0.352208	1
BGIBMGA008874	novel protein	2	2	3	0.351534	0.597216
BGIBMGA008707	novel protein	2	3	11	0.350523	0.754604
BGIBMGA005177	novel protein	6	7	23	0.350466	0.694677
BGIBMGA005298	novel protein	1	1	1	0.349331	0.575161
BGIBMGA005444	novel protein	1	1	1	0.349124	0.279018
BGIBMGA001580	novel protein	2	2	10	0.348676	0.422574
BGIBMGA008424	novel protein	1	1	3	0.348642	0.76147
BGIBMGA003125	novel protein	1	1	1	0.347642	0.388882
BGIBMGA004423	novel protein	1	1	3	0.347197	0.571694
BGIBMGA014063	novel protein	1	2	2	0.346865	0.682986
BGIBMGA013464	novel protein	5	6	33	0.346772	0.796917
BGIBMGA013235	novel protein	2	2	3	0.346664	0.6328
BGIBMGA003583	novel protein	3	3	5	0.346507	0.795776
BGIBMGA001849	novel protein	15	21	114	0.346113	0.387111
BGIBMGA008049	novel protein	1	1	4	0.345585	0.801489
BGIBMGA004647	novel protein	16	16	51	0.34522	0.113873
gi_22024031	beta_Tubulin at 60D [D.melanogaster]	3	3	4	0.344918	0.755552
BGIBMGA013594	novel protein	1	1	2	0.342621	0.70982
gi_62484278	UGP_ isoform A [D.melanogaster]	1	1	2	0.34203	0.251481
BGIBMGA001371	novel protein	3	3	7	0.342023	0.776721
BGIBMGA008914	novel protein	3	4	5	0.341658	0.504636
BGIBMGA002340	novel protein	3	3	4	0.341166	0.502624
BGIBMGA007711	novel protein	1	1	1	0.340726	0.537481
BGIBMGA014119	novel protein	8	8	15	0.339942	0.58012
BGIBMGA011975	novel protein	2	2	3	0.339721	0.567793
BGIBMGA009773	novel protein	1	1	1	0.339112	0.32704
BGIBMGA012905	novel protein	3	3	4	0.33862	0.716497
BGIBMGA007817	novel protein	1	1	2	0.33828	0.594631
BGIBMGA010135	novel protein	1	1	2	0.337235	0.63937
gi_24640849	Lysyl_tRNA synthetase_ isoform A [D.melanogaster]	1	1	2	0.337235	0.63937
BGIBMGA007314	novel protein	1	1	1	0.336953	0.470892
BGIBMGA005182	novel protein	2	2	3	0.336147	0.46364
BGIBMGA002984	novel protein	3	3	8	0.335451	0.891977
BGIBMGA008350	novel protein	1	1	2	0.335088	0.657237
BGIBMGA006999	novel protein	2	2	3	0.334876	0.494584
BGIBMGA007779	novel protein	1	2	2	0.333735	0.600973
gi_24640005	CG3011_ isoform A [D.melanogaster]	1	1	2	0.333475	0.844462
BGIBMGA010862	novel protein	1	1	2	0.333176	0.35226
gi_112734730	sex_lethal isoform L [B.mori]	2	2	5	0.332112	0.777768
BGIBMGA009668	novel protein	3	3	15	0.331321	0.364409
BGIBMGA003438	novel protein	1	1	2	0.330641	0.367335
BGIBMGA013108	novel protein	1	1	2	0.330474	0.559856
gi_45552181	SLY_1 homologous_ isoform D [D.melanogaster]	1	1	1	0.329833	0.425193
BGIBMGA007482	novel protein	1	1	1	0.327852	0.484322
BGIBMGA003474	novel protein	3	4	10	0.327035	0.877273
BGIBMGA002972	novel protein	10	13	50	0.324574	0.134482
gi_24656849	eIF5B [D.melanogaster]	3	3	4	0.323892	0.345632
BGIBMGA008812	novel protein	8	9	54	0.323414	0.188184
BGIBMGA003395	novel protein	1	1	1	0.322956	0.362147
BGIBMGA003429	novel protein	2	2	6	0.322693	0.391074
gi_21357223	Tyrosyl_tRNA synthetase [D.melanogaster]	1	1	2	0.321047	0.520555
BGIBMGA014118	novel protein	2	2	4	0.320455	0.315029
BGIBMGA011659	novel protein	1	1	3	0.32038	0.331605
gi_281361487	Rpt3R [D.melanogaster]	2	2	6	0.320322	0.782697
BGIBMGA011013	novel protein	2	2	7	0.320194	0.55164
BGIBMGA014312	novel protein	2	2	6	0.319927	0.555079
BGIBMGA007738	novel protein	1	1	2	0.318238	0.34278
BGIBMGA004785	novel protein	4	4	11	0.3171	0.75614
BGIBMGA009236	novel protein	6	6	18	0.316767	0.685421
BGIBMGA003635	novel protein	2	2	2	0.316604	0.406945
BGIBMGA014158	novel protein	2	2	10	0.313131	0.568287
BGIBMGA012470	novel protein	2	2	5	0.313079	0.534066
BGIBMGA009122	novel protein	2	2	5	0.310825	0.338224
BGIBMGA014563	novel protein	3	3	5	0.3105	0.311951
BGIBMGA004023	novel protein	1	3	7	0.309548	0.386386
BGIBMGA003018	novel protein	4	4	5	0.309538	0.436741
BGIBMGA012211	novel protein	2	3	10	0.309061	0.419959
BGIBMGA007436	novel protein	7	8	24	0.307786	0.566658
BGIBMGA014370	novel protein	1	1	1	0.307466	0.282297
BGIBMGA014474	novel protein	1	1	12	0.306905	0.924026
gi_24648520	CG17838_ isoform E [D.melanogaster]	5	5	29	0.306202	0.320942
BGIBMGA011965	novel protein	2	2	5	0.304525	0.557023
BGIBMGA001097	novel protein	4	4	14	0.303812	0.787768
BGIBMGA000209	novel protein	11	13	36	0.303173	0.735568
BGIBMGA000128	novel protein	1	1	1	0.30292	0.313952
gi_19920412	CG1486_ isoform A [D.melanogaster]	1	1	8	0.302533	0.290122
[truncated: 287 more rows]

## Sheet: Sup Table 3
Supplemental Table 3 The total proteins from the posterior silk gland at 3rd day of 5th instar identified by the gel-free based proteomic technique
Protein ID	Description	Matched peptides	Frames	Hits	Fold ZB/Lan10	P-Value ZB/Lan10
gi_1377915	enhanced green fluorescent protein [Cloning vector pEGFP_C1]	4	6	23	2995.97	9.9e-20
gi_112984224	alanine__tRNA ligase_ cytoplasmic [B.mori]	25	35	165	1180.95	2.96964e-06
gi_114050833	transketolase [B.mori]	17	22	87	269.324	3.044e-11
BGIBMGA001126	rab gdp-dissociation inhibitor, partial [P.polytes]	7	16	62	139.068	0.00157813
gi_24638766	ATP synthase_beta_ isoform A [D.melanogaster]	16	27	126	97.8931	5.72693e-08
BGIBMGA012549	H+ transporting ATP synthase beta subunit isoform 1 [B.mori]	22	34	213	93.8331	8.10463e-15
BGIBMGA013510	ribonucleoside diphosphate reductase small subunit [B.mori]	2	2	4	49.8175	1.47282e-05
BGIBMGA009207	hypothetical protein KGM_10588 [D.plexippus]	3	5	7	36.137	1.46753e-05
BGIBMGA003977	seryl-tRNA synthetase [H.armigera]	14	24	130	31.895	3.75671e-08
BGIBMGA009419	mct-1 protein [D.plexippus]	2	2	3	25.6778	0.0477038
BGIBMGA011237	26S proteasome non-ATPase regulatory subunit 13 [B.mori]	2	2	2	20.1302	0.00968204
BGIBMGA009704	protein kinase c inhibitor [B.mori]	2	3	13	14.604	0.00312533
BGIBMGA000903	putative dendritic cell protein [D.plexippus]	5	7	25	14.4641	0.0387159
BGIBMGA002012	importin-7 [D.plexippus]	3	4	20	13.8014	0.00678211
BGIBMGA006158	prohibitin protein WPH [B.mori]	7	10	35	13.6185	0.00222455
BGIBMGA000596	vacuolar ATP synthase subunit H [B.mori]	2	3	16	12.5506	9.39138e-13
BGIBMGA008879	vacuolar ATP synthase subunit H [B.mori]	2	3	6	12.5316	5.3535e-13
gi_114051866	isocitrate dehydrogenase [B.mori]	8	9	36	12.5043	1.86737e-06
BGIBMGA001876	alpha-amylase [H.armigera]	7	8	52	12.4776	1.63359e-05
BGIBMGA011674	aminopeptidase N-10 [B.mori]	8	9	34	12.4033	0.00905136
BGIBMGA006263	PREDICTED: similar to chaperonin [T.castaneum]	9	12	30	12.1082	7.24138e-05
BGIBMGA010845	hypothetical protein KGM_16808 [D.plexippus]	5	9	35	11.1385	5.47083e-09
BGIBMGA013498	putative ribophorin ii [D.plexippus]	3	4	5	10.485	0.021977
BGIBMGA011965	hypothetical protein KGM_15102 [D.plexippus]	3	3	11	10.0822	0.0126025
BGIBMGA006216	alanine--tRNA ligase, cytoplasmic [B.mori]	14	18	39	9.3691	0.000400601
BGIBMGA004965	uridine diphosphate glucosyltransferase precursor [B.mori]	18	34	241	9.19868	0.0420674
BGIBMGA012753	heat shock protein 90 beta [B.mori]	5	6	19	8.76622	0.0346899
BGIBMGA007194	hypothetical protein SINV_12670 [S.invicta]	2	3	17	8.67615	1.52962e-05
BGIBMGA002649	KIAA0667 protein [H.sapiens]	4	4	11	8.44491	0.00433307
BGIBMGA005493	putative enolase protein [B.mori]	9	12	41	8.41331	4.54238e-08
gi_148298800	enolase [B.mori]	10	14	39	8.40067	1.27335e-07
gi_120444903	chaperonin [B.mori]	5	6	32	8.2261	1.09348e-10
BGIBMGA013116	chaperonin subunit 6a zeta [B.mori]	6	8	37	8.08847	1.10069e-09
BGIBMGA004221	glucose-6-phosphate isomerase [B.mori]	5	7	12	7.97557	0.017306
BGIBMGA000404	hypothetical protein KGM_12100 [D.plexippus]	3	3	6	7.72087	4.28203e-05
BGIBMGA013343	putative Sec24B protein [D.plexippus]	3	4	16	7.31998	0.0436505
BGIBMGA002237	protein phosphatase 2 regulatory subunit A alpha isoform [H.armigera]	3	5	24	7.26857	1.35447e-14
BGIBMGA002340	protein phosphatase 2 regulatory subunit A alpha isoform [H.armigera]	4	7	22	7.10216	1.77747e-13
gi_114052643	nuclear migration protein nudC [B.mori]	4	5	9	7.04788	0.0355524
BGIBMGA008295	PREDICTED: V-type proton ATPase catalytic subunit A-like, partial [Gallus gallus]	10	13	31	7.0146	9.9e-20
BGIBMGA002570	ribophorin [D.plexippus]	6	6	14	6.94505	0.0374467
BGIBMGA013965	H+ transporting ATP synthase gamma subunit [B.mori]	8	14	74	6.94014	5.41523e-07
BGIBMGA007349	heat shock protein 60 [D.plexippus]	15	23	120	6.70817	5.56438e-08
BGIBMGA005769	signal sequence receptor beta subunit precursor [B.mori]	3	4	11	6.42364	4.51098e-07
gi_114052941	signal sequence receptor beta subunit precursor [B.mori]	4	5	23	6.40602	1.99149e-06
gi_148298878	vacuolar ATP synthase catalytic subunit A [B.mori]	9	12	38	6.3393	9.9e-20
BGIBMGA003309	ribosomal protein P0 [B.mori]	13	25	159	6.17449	2.3583e-07
BGIBMGA000484	nonclathrin coat protein gamma1-COP [B.mori]	4	7	11	6.0804	4.61112e-05
gi_114051355	WD repeat domain 61 [B.mori]	2	3	6	5.86017	2.08058e-09
BGIBMGA005315	proteasome subunit [B.mori]	3	4	15	5.84721	3.95393e-07
BGIBMGA014201	putative aldehyde dehydrogenase [D.plexippus]	13	15	77	5.75703	0.0349395
BGIBMGA002508	pyruvate kinase [B.mori]	5	5	27	5.75354	0.00753918
BGIBMGA014579	histone H2A-like protein 2 [B.mori]	4	18	80	5.73679	1.11022e-16
BGIBMGA014499	GM18786 [Drosophila sechellia]	3	14	44	5.73588	9.9e-20
BGIBMGA008812	putative vesicle associated protein [D.plexippus]	4	5	22	5.497	4.76351e-10
BGIBMGA014091	hypothetical protein KGM_07404 [D.plexippus]	2	3	9	5.3377	0.0236199
gi_187281708	triosephosphate isomerase [B.mori]	5	8	19	5.28384	0.0192841
BGIBMGA004657	proteasome subunit alpha type 6-A [B.mori]	3	3	7	4.9082	0.00470515
gi_114052677	phosphoserine aminotransferase 1 [B.mori]	17	21	65	4.89009	1.46232e-10
gi_114052160	proteasome subunit alpha type 6_A [B.mori]	2	2	3	4.87997	0.00194489
BGIBMGA012211	programmed cell death 4a [D.plexippus]	3	5	10	4.66947	0.00386076
gi_112983936	nonclathrin coat protein gamma1_COP [B.mori]	11	19	61	4.65661	0.000215959
BGIBMGA009699	chaperonin [D.plexippus]	5	6	12	4.65259	0.00116508
BGIBMGA012485	phosphoserine aminotransferase 1 [B.mori]	12	16	60	4.53191	2.75991e-08
BGIBMGA002222	glutathione S-transferase delta 2 [B.mori]	5	5	15	4.4516	3.22282e-08
BGIBMGA002013	importin-7 [D.plexippus]	4	4	15	4.35709	0.00020549
BGIBMGA010588	H+ transporting ATP synthase delta subunit [B.mori]	5	8	58	4.24796	1.56484e-05
BGIBMGA001842	simila to CG33129, partial [Papilio polytes]	12	14	34	4.21518	1.68306e-07
BGIBMGA003442	beta-tubulin [B.mori]	6	7	11	4.20845	9.9e-20
BGIBMGA010666	chaperonin subunit 4 delta [B.mori]	6	8	32	3.94414	0.0493833
BGIBMGA003815	dihydrolipoamide succinyltransferase component of 2-oxoglutarate dehydrogenase [Papilio xuthus]	2	2	8	3.92371	0.000198645
BGIBMGA004603	tubulin, beta 2C [D.plexippus]	12	15	59	3.88559	9.9e-20
BGIBMGA009830	eukaryotic translation initiation factor 6 [B.mori]	3	3	15	3.72197	9.9e-20
gi_24655737	beta_Tubulin at 56D_ isoform B [D.melanogaster]	16	20	82	3.69075	9.9e-20
BGIBMGA009132	beta-tubulin [B.mori]	18	27	127	3.67434	9.9e-20
BGIBMGA009131	tubulin beta chain,putative [Schistosoma mansoni]	18	27	127	3.67434	9.9e-20
BGIBMGA001206	chaperonin containing t-complex polypeptide 1 beta subunit [B.mori]	13	17	69	3.58764	0.000301333
gi_114053311	26S protease regulatory subunit 6B [B.mori]	3	3	8	3.53267	0.00131197
BGIBMGA010381	SLY-1 homologous [Papilio xuthus]	2	2	9	3.483	0.00592353
gi_24645350	beta_Tubulin at 85D [D.melanogaster]	11	15	57	3.46372	9.9e-20
BGIBMGA009821	PREDICTED: actin, cytoplasmic 1-like isoform 4 [Macaca mulatta]	6	9	15	3.43907	5.19584e-14
gi_112983456	beta_tubulin [B.mori]	6	6	12	3.41647	9.99201e-15
gi_148298802	signal recognition particle receptor alpha subunit [B.mori]	2	2	13	3.33066	9.73333e-13
BGIBMGA004782	26S protease regulatory subunit 6A [D.plexippus]	7	9	41	3.26529	0.00275918
BGIBMGA003361	karyopherin beta 3, partial [Papilio polytes]	14	20	100	3.26365	0.0318159
BGIBMGA011746	DEAD box polypeptide 5 isoform 1 [B.mori]	4	4	10	3.21445	0.000101385
BGIBMGA002689	seroin 1 precursor [B.mori]	2	4	13	3.18528	3.50723e-05
gi_187281831	actin_ muscle_type A2 [B.mori]	7	7	15	2.90988	5.55112e-16
BGIBMGA013945	actin [Aedes aegypti]	7	11	34	2.90923	5.55112e-16
gi_17647135	actin 57B_ isoform A [D.melanogaster]	8	11	29	2.89443	3.9968e-15
BGIBMGA008551	hypothetical protein KGM_21044 [D.plexippus]	8	8	31	2.79635	0.00184357
gi_17865841	alpha_Tubulin at 85E [D.melanogaster]	7	20	42	2.75939	1.22229e-07
BGIBMGA002542	alpha-tubulin [B.mori]	10	35	247	2.75284	3.99869e-06
BGIBMGA005177	splicing factor proline- and glutamine-rich [B.mori]	2	2	5	2.74514	0.0463229
BGIBMGA013413	alpha-tubulin [Papilio xuthus]	12	38	262	2.73126	2.44004e-05
gi_24583984	Vha68_2_ isoform A [D.melanogaster]	3	4	8	2.7114	3.25969e-10
BGIBMGA004647	brefeldin a-inhibited guanine nucleotide-exchange protein, partial [Papilio polytes]	2	3	16	2.67864	0.0409761
gi_17530805	actin 5C_ isoform B [D.melanogaster]	11	19	130	2.61312	6.07181e-13
BGIBMGA000867	ribosomal protein S2 [Spodoptera frugiperda]	9	12	60	2.5903	0.000662732
BGIBMGA009012	mitochondrial cytochrome c [B.mori]	3	3	9	2.4611	0.00253273
BGIBMGA002906	acyl-CoA binding protein [B.mori]	2	2	12	2.4272	4.91545e-06
BGIBMGA001119	putative rab gdp-dissociation inhibitor [D.plexippus]	12	12	79	2.41977	1.56204e-07
BGIBMGA010489	hypothetical protein KGM_09047 [D.plexippus]	2	2	8	2.34636	0.000200136
BGIBMGA007948	CG1977 [Drosophila miranda]	11	12	29	2.2633	0.0403705
BGIBMGA003892	coatomer protein complex subunit beta 2 [B.mori]	10	11	48	2.25713	0.0194168
BGIBMGA002461	hypothetical protein KGM_03522 [D.plexippus]	2	3	13	2.22664	0.0370178
BGIBMGA006056	hypothetical protein KGM_07760 [D.plexippus]	2	2	8	2.20542	0.00056356
BGIBMGA012182	chaperonin [D.plexippus]	8	9	38	2.10635	1.82757e-05
BGIBMGA003608	elongation factor 1 alpha [B.mori]	16	52	222	2.06588	4.96847e-12
BGIBMGA004374	Ribosomal protein L7Ae/L30e/S12e/Gadd45 [B.mori]	7	14	77	1.67748	0.00314465
gi_28572004	triose phosphate isomerase_ isoform A [D.melanogaster]	2	2	3	1.66856	0.0369769
gi_24641402	heat shock protein cognate 3_ isoform A [D.melanogaster]	9	12	65	1.58679	1.40321e-12
BGIBMGA002381	heat shock cognate protein [B.mori]	25	33	182	1.57159	0.0101816
BGIBMGA007950	heat shock protein 70-3 [B.mori]	15	21	132	1.56346	1.07672e-09
BGIBMGA012240	terribly reduced optic lobes, partial [P.xuthus]	13	14	47	1.52959	0.000269206
BGIBMGA000104	novel protein	7	8	33	1.48358	0.0283881
BGIBMGA001483	Ribosomal protein S17e [B.mori]	4	7	32	1.47384	5.47589e-05
BGIBMGA001035	novel protein	8	9	50	1.22412	1.84069e-06
BGIBMGA006319	IPR006616 Protein of unknown function DM9[B.mori]	2	2	2	0.879267	0.000716905
BGIBMGA000066	Ribosomal protein L32e[B.mori]	3	3	7	0.711686	0.00927156
BGIBMGA000959	Ribosomal protein L31e[B.mori]	4	8	69	0.701689	4.6051e-09
BGIBMGA001124	novel protein	7	9	33	0.676061	0.000335353
BGIBMGA004038	novel protein	2	2	6	181.019	0.0714388
BGIBMGA003066	novel protein	1	2	3	95.1327	0.0158157
BGIBMGA009122	novel protein	1	1	4	86.3897	0.00261914
BGIBMGA000767	novel protein	3	3	9	66.6164	0.493863
BGIBMGA009885	novel protein	1	1	2	54.4897	0.0234927
BGIBMGA003656	novel protein	3	4	5	54.1868	0.424586
BGIBMGA009911	novel protein	6	7	24	39.6315	0.651435
BGIBMGA004822	novel protein	3	3	11	35.227	0.163069
gi_114053115	EN protein binding/engrailed nuclear homeoprotein_regulated protein [B.mori]	3	3	13	34.2855	0.166394
BGIBMGA001009	novel protein	1	1	5	33.8095	6.28416e-07
BGIBMGA009409	novel protein	1	1	1	31.4808	0.0558621
BGIBMGA000798	novel protein	1	1	1	25.9966	0.127816
BGIBMGA000102	novel protein	1	1	2	25.8823	0.00686179
BGIBMGA014143	novel protein	1	1	2	24.8551	0.00367605
BGIBMGA009811	novel protein	1	1	2	22.4804	0.231135
BGIBMGA013464	novel protein	4	7	42	22.235	0.431031
gi_114052589	phosphate transport protein [B.mori]	2	2	2	20.0607	0.185992
BGIBMGA001353	novel protein	5	5	21	19.4706	0.445589
BGIBMGA012851	novel protein	7	8	23	19.4588	0.0729842
gi_114051770	26S proteasome non_ATPase regulatory subunit 13 [B.mori]	7	8	26	19.422	0.166777
BGIBMGA010739	novel protein	4	5	11	17.9494	0.419201
BGIBMGA014221	novel protein	1	2	5	17.9196	2.56714e-06
gi_112984026	saposin_related precursor [B.mori]	1	1	2	17.9196	2.56714e-06
BGIBMGA003330	novel protein	2	2	3	17.8289	0.187589
BGIBMGA012503	novel protein	1	1	2	17.3178	0.017621
BGIBMGA008291	novel protein	1	1	1	17.1215	0.00637429
BGIBMGA009851	novel protein	7	8	15	16.592	0.121298
BGIBMGA012470	novel protein	1	1	1	16.2746	0.0611787
gi_112984058	ribosomal protein S7 [B.mori]	5	10	42	15.8548	0.712978
BGIBMGA000474	novel protein	1	1	1	15.7509	0.135028
BGIBMGA007949	novel protein	1	1	1	15.438	0.0345153
BGIBMGA006260	novel protein	5	5	22	15.4282	0.111004
BGIBMGA009598	novel protein	1	1	2	13.9035	0.0363075
BGIBMGA009182	novel protein	1	1	6	13.1292	0.000138894
BGIBMGA002880	novel protein	1	3	10	12.3538	0.00655527
BGIBMGA014064	novel protein	1	1	2	11.353	0.0398475
BGIBMGA004165	novel protein	23	31	60	10.8467	0.359761
BGIBMGA000991	novel protein	4	4	8	10.6055	0.17347
BGIBMGA002639	novel protein	1	1	1	10.443	0.068384
BGIBMGA012632	novel protein	1	2	8	9.64836	8.18765e-07
gi_112983938	eukaryotic translation initiation factor 3 subunit E [B.mori]	4	7	12	9.4861	0.0898013
BGIBMGA012309	novel protein	11	14	49	9.47031	0.121001
BGIBMGA009875	novel protein	2	2	2	9.31672	0.176111
BGIBMGA003669	novel protein	4	7	10	9.30434	0.119648
BGIBMGA008957	novel protein	4	5	20	9.26208	0.582204
BGIBMGA001265	novel protein	1	3	7	8.86135	0.0270352
BGIBMGA011013	novel protein	1	1	2	8.85743	0.0035006
gi_304307739	tudor staphylococcus/micrococcal nuclease [B.mori]	33	42	221	8.73895	0.350409
BGIBMGA003186	novel protein	11	16	80	8.57967	0.664742
BGIBMGA011009	novel protein	1	2	6	8.34761	0.00365587
BGIBMGA000683	novel protein	1	1	4	8.12191	0.000179066
gi_281371488	translation elongation factor 2 isoform 2 [B.mori]	35	62	281	8.11768	0.686307
BGIBMGA009559	novel protein	1	2	9	7.88755	1.47196e-09
gi_148298746	glucose_6_phosphate isomerase [B.mori]	7	11	45	7.68028	0.0644987
BGIBMGA008595	novel protein	1	1	1	7.62671	0.141764
gi_112983206	eukaryotic translation initiation factor 5 [B.mori]	7	8	27	7.34781	0.109166
BGIBMGA002620	novel protein	1	1	2	7.2883	0.00106283
BGIBMGA000381	novel protein	1	2	5	7.12231	0.00285047
BGIBMGA013063	novel protein	11	14	85	7.0194	0.202033
BGIBMGA011983	novel protein	4	5	21	6.97589	0.0632933
BGIBMGA013699	novel protein	1	1	2	6.92093	0.0445673
gi_114052286	glutathione S_transferase unclassified 2 [B.mori]	3	3	13	6.89878	0.0545268
BGIBMGA000292	novel protein	6	7	25	6.71661	0.468047
BGIBMGA001921	novel protein	1	1	6	6.09807	0.00641622
BGIBMGA006816	novel protein	2	2	4	5.71236	0.0515396
BGIBMGA002355	novel protein	4	5	13	5.64488	0.0766674
BGIBMGA010289	novel protein	6	7	14	5.50341	0.125855
BGIBMGA008194	novel protein	1	1	1	5.40594	0.00295088
gi_112983138	phenol UDP_glucosyltransferase precursor [B.mori]	1	1	7	5.34581	0.000128682
BGIBMGA006548	novel protein	1	1	2	5.34126	0.00199736
BGIBMGA012662	novel protein	1	1	5	5.33034	0.0349289
BGIBMGA010684	novel protein	2	2	2	5.1847	0.0902729
BGIBMGA013889	novel protein	1	1	1	5.16535	0.00622961
BGIBMGA006966	novel protein	1	2	6	5.10579	8.11157e-09
BGIBMGA001551	novel protein	1	2	9	4.97371	4.81641e-11
BGIBMGA010831	novel protein	1	1	6	4.95007	0.000262292
BGIBMGA009393	novel protein	9	111	751	4.84125	0.0510104
BGIBMGA014267	novel protein	1	1	1	4.80581	0.3225
BGIBMGA004858	novel protein	1	1	9	4.7889	5.72561e-09
BGIBMGA001547	novel protein	1	1	3	4.77725	0.0164343
BGIBMGA012922	novel protein	1	1	1	4.72409	0.0691227
BGIBMGA007941	novel protein	1	1	1	4.56544	0.370404
BGIBMGA004891	novel protein	4	6	21	4.37822	0.274449
BGIBMGA010847	novel protein	1	1	4	4.34676	0.00332489
BGIBMGA001197	novel protein	2	2	12	4.27835	0.110632
BGIBMGA005071	novel protein	1	1	4	4.25493	0.00329393
BGIBMGA008921	novel protein	13	24	143	4.20926	0.138104
BGIBMGA001558	novel protein	4	4	9	4.20221	0.0932842
BGIBMGA007413	novel protein	1	1	2	4.16416	0.00533552
BGIBMGA001107	novel protein	12	14	66	4.00436	0.257885
BGIBMGA013743	novel protein	1	1	4	3.97682	0.00918842
BGIBMGA012323	novel protein	1	2	12	3.90685	3.97396e-08
BGIBMGA002188	novel protein	1	1	7	3.89506	5.29991e-08
BGIBMGA000119	novel protein	1	1	4	3.86038	6.23894e-05
gi_17647657	Mo25 [D.melanogaster]	1	1	8	3.72457	1.1913e-07
gi_306518638	putative acetyl transferase [B.mori]	2	2	7	3.54612	0.0898856
BGIBMGA014185	novel protein	1	1	1	3.50349	0.0258291
BGIBMGA002361	novel protein	1	2	4	3.47813	0.000138042
BGIBMGA001566	novel protein	1	1	1	3.34943	0.0282505
BGIBMGA002967	novel protein	7	11	19	3.33062	0.784689
BGIBMGA009554	novel protein	1	1	2	3.25474	0.00725413
gi_18079273	stress_sensitive B_ isoform A [D.melanogaster]	6	8	25	3.22284	0.516827
BGIBMGA014294	novel protein	1	2	11	3.22062	9.08463e-09
BGIBMGA001471	novel protein	3	5	27	3.13907	0.0718432
BGIBMGA002840	novel protein	6	9	30	3.12825	0.920529
BGIBMGA002241	novel protein	7	8	14	3.12386	0.268819
gi_21355589	pixie_ isoform A [D.melanogaster]	2	2	7	3.09441	0.102574
BGIBMGA007778	novel protein	1	2	17	3.0913	3.72995e-10
BGIBMGA009955	novel protein	1	1	2	3.05101	0.0570001
gi_24583992	Vha68_1 [D.melanogaster]	1	2	7	3.02598	1.50938e-11
BGIBMGA001708	novel protein	3	3	10	2.97683	0.0781348
BGIBMGA012298	novel protein	4	5	23	2.9708	0.214887
BGIBMGA009562	novel protein	2	3	16	2.80371	0.578644
gi_17137560	TER94_ isoform A [D.melanogaster]	7	9	38	2.80127	0.242893
BGIBMGA000074	novel protein	8	12	37	2.77506	0.330559
BGIBMGA004892	novel protein	1	1	2	2.74702	0.0294975
BGIBMGA000804	novel protein	2	2	2	2.67471	0.34035
BGIBMGA008955	novel protein	15	19	84	2.63973	0.648914
BGIBMGA010129	novel protein	3	4	12	2.63374	0.0593508
BGIBMGA011982	novel protein	1	2	3	2.603	0.257894
BGIBMGA000002	novel protein	3	3	14	2.58828	0.104532
gi_112984454	protein disulfide isomerase precursor [B.mori]	19	110	570	2.56615	0.999995
BGIBMGA002376	novel protein	1	1	5	2.54729	0.0054763
gi_112983322	transitional endoplasmic reticulum ATPase TER94 [B.mori]	13	17	68	2.54503	0.684943
BGIBMGA005564	novel protein	1	1	7	2.52052	0.00235316
BGIBMGA011844	novel protein	22	115	671	2.51799	0.919896
BGIBMGA003515	novel protein	1	1	4	2.47147	0.147714
BGIBMGA005688	novel protein	1	1	3	2.45559	0.237638
BGIBMGA004688	novel protein	7	10	32	2.43658	0.156675
BGIBMGA007701	novel protein	9	24	116	2.41311	0.59607
BGIBMGA012935	novel protein	21	25	85	2.40784	0.964502
BGIBMGA005161	novel protein	1	1	4	2.39847	0.0699533
BGIBMGA002353	novel protein	1	2	10	2.36242	0.433021
BGIBMGA001380	novel protein	1	1	2	2.33401	0.191499
BGIBMGA002894	novel protein	2	2	2	2.32372	0.167353
gi_255652895	signal transducer and activator of transcription [B.mori]	1	1	1	2.30158	0.401599
BGIBMGA003758	novel protein	5	5	18	2.301	0.195245
BGIBMGA005701	novel protein	4	5	9	2.29621	0.391314
BGIBMGA008930	novel protein	5	5	16	2.29479	0.288783
BGIBMGA002478	novel protein	1	1	2	2.29337	0.0596562
gi_112983334	methylthioribose_1_phosphate isomerase [B.mori]	1	1	1	2.29337	0.0596562
BGIBMGA003474	novel protein	2	2	5	2.21929	0.369464
BGIBMGA003279	novel protein	1	2	6	2.20619	0.0377315
BGIBMGA010147	novel protein	1	1	5	2.20509	0.0758899
BGIBMGA011133	novel protein	1	1	1	2.20157	0.171498
BGIBMGA002005	novel protein	5	8	34	2.18999	0.599587
BGIBMGA002773	novel protein	1	1	2	2.15134	0.313427
gi_114051461	nascent polypeptide associated complex protein alpha subunit [B.mori]	6	8	29	2.15014	0.182584
BGIBMGA001188	novel protein	1	1	5	2.14581	0.0256108
BGIBMGA004608	novel protein	14	17	65	2.14136	0.543095
BGIBMGA007162	novel protein	1	1	4	2.12994	0.0456747
BGIBMGA000132	novel protein	7	8	24	2.11854	0.854692
BGIBMGA006620	novel protein	1	1	5	2.05245	0.00782077
BGIBMGA012687	novel protein	6	6	19	2.04956	0.245595
BGIBMGA002493	novel protein	12	15	58	2.03735	0.373103
gi_114052545	chaperonin subunit 4 delta [B.mori]	2	3	5	2.01914	0.474352
BGIBMGA007072	novel protein	1	1	10	2.01295	0.0213826
BGIBMGA002544	novel protein	2	3	12	1.97493	0.650553
BGIBMGA010120	novel protein	3	3	14	1.96551	0.242176
BGIBMGA009685	novel protein	2	2	2	1.94904	0.191846
BGIBMGA007889	novel protein	3	3	11	1.89373	0.374294
BGIBMGA003985	novel protein	10	10	17	1.88978	0.286029
BGIBMGA007516	novel protein	7	10	14	1.88831	0.378577
gi_24585671	histone H2B [D.melanogaster]	4	11	65	1.8839	0.955049
BGIBMGA001106	novel protein	5	8	37	1.876	0.369468
BGIBMGA006574	novel protein	1	1	5	1.86404	0.312354
BGIBMGA007490	novel protein	7	9	73	1.85568	0.44083
gi_17136320	ribosomal protein LP1 [D.melanogaster]	2	6	15	1.85232	0.834778
BGIBMGA010653	novel protein	1	1	2	1.84474	0.391358
BGIBMGA011144	novel protein	1	2	10	1.79399	0.0709083
BGIBMGA004534	novel protein	1	1	2	1.77572	0.559524
BGIBMGA009189	novel protein	1	2	5	1.76672	0.549121
BGIBMGA007637	novel protein	18	22	109	1.76383	0.654544
BGIBMGA004681	novel protein	1	2	8	1.75664	0.913636
BGIBMGA012701	novel protein	9	10	24	1.75125	0.418484
BGIBMGA002405	novel protein	5	9	33	1.7422	0.437989
BGIBMGA006878	novel protein	1	1	1	1.73513	0.325925
BGIBMGA013201	novel protein	8	12	69	1.71764	0.974231
gi_17136574	ribosomal protein S27A [D.melanogaster]	2	2	4	1.7114	0.1825
BGIBMGA008725	novel protein	3	4	13	1.69603	0.73167
BGIBMGA005738	novel protein	1	1	1	1.69191	0.395398
BGIBMGA009515	novel protein	3	3	7	1.68337	0.582957
BGIBMGA001549	novel protein	4	5	35	1.68126	0.4583
gi_17737941	heat shock protein cognate 2 [D.melanogaster]	2	3	9	1.6801	0.288384
BGIBMGA006362	novel protein	1	1	4	1.65703	0.796
BGIBMGA004276	novel protein	5	6	17	1.64903	0.856833
BGIBMGA011180	novel protein	6	10	58	1.64882	0.185232
BGIBMGA001853	novel protein	20	32	217	1.62433	0.997329
BGIBMGA009496	novel protein	6	6	18	1.62136	0.70225
BGIBMGA003337	novel protein	7	14	72	1.61294	0.968981
BGIBMGA006474	novel protein	1	1	3	1.61091	0.0362055
BGIBMGA007334	novel protein	2	3	9	1.61081	0.767755
gi_114052561	cytosolic malate dehydrogenase [B.mori]	8	10	44	1.60579	0.827353
BGIBMGA007988	novel protein	11	12	63	1.59115	0.0905622
BGIBMGA007315	novel protein	3	3	3	1.57934	0.658735
BGIBMGA012122	novel protein	5	7	23	1.57206	0.0881715
BGIBMGA011936	novel protein	5	6	27	1.5714	0.63711
BGIBMGA006313	novel protein	3	5	31	1.57007	0.357511
BGIBMGA008542	novel protein	1	1	9	1.5591	0.389129
BGIBMGA009978	novel protein	2	3	27	1.55789	0.810131
gi_158631166	ADP/ATP translocase [B.mori]	15	33	117	1.55518	0.95346
BGIBMGA007601	novel protein	9	10	37	1.5548	0.779758
gi_114051245	proteasome alpha 3 subunit [B.mori]	3	4	9	1.55388	0.624519
BGIBMGA012029	novel protein	1	1	1	1.53883	0.20647
BGIBMGA010015	novel protein	1	1	5	1.53807	0.625555
BGIBMGA010941	novel protein	5	5	8	1.53662	0.494087
BGIBMGA003840	novel protein	2	2	9	1.52575	0.732052
BGIBMGA013072	novel protein	3	3	11	1.51948	0.710092
BGIBMGA003475	novel protein	7	7	40	1.51634	0.659966
gi_17738165	heat shock protein 68 [D.melanogaster]	3	5	33	1.51255	0.116261
gi_24646135	Heat_shock_protein_70Aa [D.melanogaster]	3	4	12	1.51255	0.116261
gi_17647515	heat shock protein cognate 1_ isoform A [D.melanogaster]	6	7	43	1.50865	0.682159
BGIBMGA005550	novel protein	2	2	2	1.50207	0.0549642
BGIBMGA011774	novel protein	1	1	1	1.5001	0.66767
BGIBMGA005732	novel protein	1	1	1	1.49531	0.435158
BGIBMGA012960	novel protein	2	2	10	1.49037	0.551189
BGIBMGA006507	novel protein	8	9	41	1.47693	0.0650554
gi_164448672	fibroin heavy chain precursor [B.mori]	5	9	54	1.47288	0.841527
BGIBMGA004416	novel protein	1	1	1	1.4712	0.587362
BGIBMGA004614	novel protein	4	7	35	1.46851	0.508138
BGIBMGA002209	novel protein	4	4	29	1.46598	0.867755
BGIBMGA014578	novel protein	3	7	36	1.45904	0.643011
BGIBMGA013070	novel protein	1	1	2	1.44471	0.772012
BGIBMGA007438	novel protein	1	1	5	1.44199	0.673877
BGIBMGA009648	novel protein	2	2	3	1.43507	0.180299
gi_17136248	eukaryotic initiation factor 4a_ isoform C [D.melanogaster]	3	3	21	1.43173	0.942663
BGIBMGA002211	novel protein	1	1	1	1.42131	0.63621
BGIBMGA013777	novel protein	3	3	11	1.40912	0.403638
BGIBMGA004422	novel protein	1	1	5	1.40092	0.747212
BGIBMGA006022	novel protein	8	10	32	1.39861	0.847923
BGIBMGA002295	novel protein	6	6	13	1.39513	0.780493
BGIBMGA006749	novel protein	4	4	8	1.3936	0.697004
BGIBMGA006209	novel protein	2	2	6	1.39225	0.745615
BGIBMGA007436	novel protein	3	3	7	1.39028	0.891421
BGIBMGA002462	novel protein	11	11	56	1.38804	0.676461
BGIBMGA013144	novel protein	2	3	6	1.38405	0.661011
BGIBMGA010238	novel protein	1	1	7	1.38356	0.912529
BGIBMGA013025	novel protein	5	5	13	1.36293	0.824648
BGIBMGA002979	novel protein	1	1	2	1.35732	0.798157
BGIBMGA011175	novel protein	1	1	2	1.35344	0.78394
BGIBMGA005425	novel protein	1	1	3	1.34924	0.873734
BGIBMGA008302	novel protein	11	16	79	1.34712	0.0886131
BGIBMGA006835	novel protein	5	5	37	1.33959	0.883236
BGIBMGA004169	novel protein	1	1	4	1.33646	0.973356
BGIBMGA005323	novel protein	5	5	17	1.33591	0.836869
BGIBMGA007121	novel protein	5	5	17	1.3341	0.792287
BGIBMGA011770	novel protein	1	1	1	1.33245	0.590411
BGIBMGA008959	novel protein	1	1	1	1.33192	0.616011
BGIBMGA007661	novel protein	7	7	43	1.33004	0.794708
BGIBMGA004612	novel protein	23	30	147	1.32738	0.44656
BGIBMGA009571	novel protein	3	3	4	1.32708	0.671524
gi_24585709	elongation factor 2b_ isoform A [D.melanogaster]	16	21	114	1.32416	0.960759
BGIBMGA001525	novel protein	8	9	44	1.32296	0.760268
gi_8572572	cytochrome c oxidase subunit II [B.mori]	2	2	12	1.32229	0.906924
BGIBMGA007645	novel protein	4	5	36	1.32116	0.896154
BGIBMGA009963	novel protein	1	1	5	1.31947	0.391763
BGIBMGA002953	novel protein	3	4	11	1.31771	0.777153
BGIBMGA010725	novel protein	18	21	60	1.31185	0.953564
gi_17647529	heat shock protein 83 [D.melanogaster]	7	9	34	1.30071	0.0933972
BGIBMGA009138	novel protein	5	5	14	1.30014	0.771062
BGIBMGA005117	novel protein	9	10	28	1.29584	0.809114
BGIBMGA007258	novel protein	5	6	20	1.28845	0.521526
BGIBMGA002750	novel protein	3	3	7	1.28808	0.815997
BGIBMGA006357	novel protein	2	2	2	1.28655	0.645678
BGIBMGA009563	novel protein	1	1	4	1.28572	0.887547
BGIBMGA000797	novel protein	1	1	1	1.2691	0.771297
BGIBMGA007964	novel protein	1	1	3	1.26831	0.958775
BGIBMGA001060	novel protein	1	1	8	1.25944	0.980381
BGIBMGA009841	novel protein	4	4	9	1.25901	0.811671
BGIBMGA007061	novel protein	2	2	18	1.25889	0.516857
BGIBMGA011975	novel protein	1	1	1	1.25786	0.800197
BGIBMGA009974	novel protein	4	5	13	1.24821	0.937791
BGIBMGA010130	novel protein	4	4	5	1.23724	0.932827
BGIBMGA007977	novel protein	1	1	5	1.23354	0.961981
gi_18860063	Rpt3 [D.melanogaster]	1	1	2	1.22778	0.984345
BGIBMGA006463	novel protein	4	5	10	1.21982	0.627951
gi_114051309	mRNA cap_binding protein eIF4E [B.mori]	2	2	11	1.2185	0.798862
BGIBMGA007000	novel protein	2	2	4	1.19952	0.786782
BGIBMGA010840	novel protein	2	2	3	1.19702	0.719317
BGIBMGA008865	novel protein	5	5	32	1.19581	0.911379
BGIBMGA004315	novel protein	2	2	5	1.19017	0.818999
gi_24662899	CG14131 [D.melanogaster]	1	1	1	1.18566	0.712495
BGIBMGA005560	novel protein	2	3	20	1.17423	0.999989
BGIBMGA010751	novel protein	4	5	29	1.16743	0.634182
BGIBMGA007783	novel protein	1	1	3	1.16488	0.981547
BGIBMGA004992	novel protein	8	8	28	1.16336	0.870653
BGIBMGA000167	novel protein	1	1	1	1.16219	0.822196
BGIBMGA005994	novel protein	3	4	7	1.15823	0.849835
BGIBMGA012030	novel protein	5	7	31	1.15802	0.843183
BGIBMGA000793	novel protein	1	1	3	1.15474	0.920008
BGIBMGA003759	novel protein	1	1	4	1.1489	0.986771
gi_289629218	coatomer protein complex subunit beta [B.mori]	3	3	4	1.14578	0.533935
BGIBMGA001954	novel protein	1	1	4	1.14527	0.987011
BGIBMGA013717	novel protein	6	7	23	1.14247	0.77175
BGIBMGA004060	novel protein	4	4	16	1.14133	0.667903
BGIBMGA010475	novel protein	7	7	28	1.13394	0.910945
gi_112983600	cellular retinoic acid binding protein [B.mori]	11	13	65	1.13207	0.963803
BGIBMGA002504	novel protein	6	11	48	1.1288	0.616564
BGIBMGA006613	novel protein	2	2	4	1.12803	0.647411
BGIBMGA003726	novel protein	7	10	54	1.12795	0.933513
BGIBMGA005205	novel protein	2	2	8	1.12598	0.887286
BGIBMGA011412	novel protein	1	1	6	1.12411	0.999906
BGIBMGA004375	novel protein	10	13	79	1.12397	0.122838
BGIBMGA004302	novel protein	2	3	14	1.12342	0.165939
BGIBMGA007604	novel protein	2	2	9	1.11983	1
BGIBMGA001347	novel protein	5	6	27	1.11948	0.923389
BGIBMGA002429	novel protein	5	19	82	1.11857	0.980929
BGIBMGA000103	novel protein	4	5	13	1.11723	0.837993
BGIBMGA003197	novel protein	2	2	3	1.11617	0.675674
BGIBMGA007938	novel protein	1	1	1	1.11242	0.867128
gi_148298693	heat shock protein hsp20.8 [B.mori]	2	2	3	1.11002	0.879792
gi_148298695	poly A binding protein [B.mori]	8	10	42	1.10955	0.948045
BGIBMGA014175	novel protein	1	2	8	1.0993	0.980426
BGIBMGA013021	novel protein	11	14	64	1.0988	0.968591
BGIBMGA007408	novel protein	1	1	1	1.09374	0.883847
BGIBMGA006536	novel protein	1	2	11	1.08654	0.99984
gi_148298793	ribosomal protein P1 [B.mori]	6	16	76	1.07865	0.978136
gi_24661336	arginine kinase_ isoform A [D.melanogaster]	4	5	28	1.07673	0.9818
BGIBMGA001218	novel protein	6	8	40	1.0767	0.879952
BGIBMGA004191	novel protein	1	3	22	1.07498	1
BGIBMGA007363	novel protein	3	5	34	1.06926	0.992337
BGIBMGA007332	novel protein	3	4	13	1.06647	0.915355
gi_17137738	Rpt1 [D.melanogaster]	3	3	7	1.05887	0.875214
BGIBMGA000505	novel protein	1	1	6	1.05055	0.999953
BGIBMGA009780	novel protein	2	2	9	1.04898	0.87451
gi_112982880	translationally_controlled tumor protein homolog [B.mori]	8	12	53	1.04734	0.846225
BGIBMGA006986	novel protein	4	7	48	1.0454	0.98704
BGIBMGA004905	novel protein	4	7	47	1.04364	0.952097
BGIBMGA003259	novel protein	5	5	17	1.04067	0.959349
gi_24647073	tropomyosin 1_ isoform M [D.melanogaster]	1	1	6	1.03737	0.999992
gi_153792609	tropomyosin_2 isoform 4 [B.mori]	1	1	2	1.03737	1
gi_160333857	tropomyosin_2 isoform 3 [B.mori]	1	1	1	1.03737	1
BGIBMGA003070	novel protein	1	1	3	1.0369	0.999403
BGIBMGA011696	novel protein	4	4	21	1.03555	0.925451
gi_187281361	transformer 2 isoform A [B.mori]	1	1	5	1.03419	0.974992
gi_24647089	tropomyosin 1_ isoform A [D.melanogaster]	2	2	8	1.03203	0.881495
BGIBMGA005115	novel protein	8	13	60	1.03185	0.990131
BGIBMGA000542	novel protein	2	2	7	1.02883	0.941051
gi_24650747	ribosomal protein L4 [D.melanogaster]	1	1	6	1.02795	1
BGIBMGA004932	novel protein	16	20	84	1.02755	0.9911
gi_148298796	thioredoxin_like protein [B.mori]	2	4	15	1.01923	0.886998
gi_114052272	tropomyosin_2 isoform 2 [B.mori]	4	4	7	1.01896	0.826609
gi_21357965	Glycyl_tRNA synthetase_ isoform A [D.melanogaster]	1	2	4	1.01259	0.985619
BGIBMGA006704	novel protein	8	9	47	1.01166	0.918664
BGIBMGA007586	novel protein	17	23	122	1.01154	0.997253
BGIBMGA000072	novel protein	7	8	27	1.00853	0.919075
BGIBMGA004541	novel protein	6	6	22	1.00331	0.875899
BGIBMGA012032	novel protein	3	4	10	1.0029	0.37422
BGIBMGA006840	novel protein	3	4	16	1.00117	0.933657
BGIBMGA011467	novel protein	5	8	47	0.999472	0.929509
BGIBMGA004993	novel protein	4	4	14	0.996265	0.90008
BGIBMGA005428	novel protein	1	1	4	0.995946	1
BGIBMGA009249	novel protein	5	5	21	0.99412	0.920654
gi_114052018	nucleosome assembly protein isoform 2 [B.mori]	7	7	19	0.993563	0.916243
BGIBMGA002582	novel protein	4	5	25	0.991773	0.961838
BGIBMGA005812	novel protein	15	20	129	0.991245	0.997711
BGIBMGA001847	novel protein	1	1	5	0.990788	1
BGIBMGA007728	novel protein	9	10	46	0.985135	0.954044
BGIBMGA002811	novel protein	4	4	13	0.981769	0.830425
gi_17737907	ribosomal protein L3_ isoform A [D.melanogaster]	2	3	16	0.978232	0.875275
BGIBMGA004029	novel protein	1	1	4	0.977006	0.99999
gi_24640124	knockdown_ isoform B [D.melanogaster]	2	2	6	0.975119	0.926523
BGIBMGA005793	novel protein	3	3	8	0.975008	0.862378
gi_24668022	CG32436 [D.melanogaster]	1	1	1	0.972424	0.961508
BGIBMGA001646	novel protein	1	2	2	0.969835	0.914563
BGIBMGA001546	novel protein	3	3	10	0.967371	0.970808
BGIBMGA007268	novel protein	3	4	5	0.966957	0.912874
gi_112984000	ribosomal protein S18 [B.mori]	6	11	31	0.963967	0.248959
BGIBMGA006178	novel protein	2	2	4	0.960462	0.730351
BGIBMGA007684	novel protein	1	1	8	0.95863	1
gi_112983505	ribosomal protein S10 [B.mori]	7	11	72	0.957829	0.992166
BGIBMGA007451	novel protein	1	1	1	0.949661	0.874104
BGIBMGA013100	novel protein	3	4	16	0.948372	0.921876
BGIBMGA001501	novel protein	3	3	3	0.939626	0.912156
BGIBMGA014483	novel protein	3	4	14	0.930932	0.867954
BGIBMGA012852	novel protein	1	2	11	0.927537	0.999888
BGIBMGA008501	novel protein	1	1	2	0.926982	0.991114
gi_112982661	ribosomal protein S6 [B.mori]	5	8	34	0.926301	0.931857
BGIBMGA002814	novel protein	5	6	20	0.925693	0.754344
BGIBMGA012133	novel protein	1	1	1	0.921888	0.931091
BGIBMGA004309	novel protein	7	7	28	0.920513	0.943977
BGIBMGA013996	novel protein	6	9	44	0.9202	0.990097
gi_24581262	overgrown hematopoietic organs at 23B_ isoform A [D.melanogaster]	1	1	2	0.916924	0.999957
BGIBMGA013076	novel protein	4	4	9	0.915216	0.616297
BGIBMGA005270	novel protein	3	3	7	0.909256	0.208507
BGIBMGA009319	novel protein	13	20	121	0.908126	0.983093
BGIBMGA013898	novel protein	2	2	18	0.907101	0.90803
gi_114051175	signal recognition particle 19 kDa protein [B.mori]	1	1	1	0.905924	0.869577
BGIBMGA002309	novel protein	1	1	5	0.904686	0.999849
BGIBMGA012904	novel protein	4	6	19	0.902291	0.86549
BGIBMGA006424	novel protein	2	3	6	0.901196	0.978745
gi_112984156	ribosomal protein L35A [B.mori]	4	6	29	0.899983	0.978833
BGIBMGA009208	novel protein	2	2	3	0.899334	0.692555
BGIBMGA006477	novel protein	1	1	1	0.899088	0.49432
BGIBMGA013532	novel protein	2	2	2	0.895484	0.766649
BGIBMGA011703	novel protein	1	1	2	0.893326	0.999999
BGIBMGA007311	novel protein	7	11	64	0.890694	0.94693
BGIBMGA000921	novel protein	1	1	4	0.883326	0.997515
BGIBMGA001363	novel protein	3	4	22	0.883087	0.917284
BGIBMGA000559	novel protein	2	4	7	0.88139	0.9902
gi_19922390	ribosomal protein S15_ isoform A [D.melanogaster]	2	3	10	0.880895	0.916126
BGIBMGA006945	novel protein	11	17	46	0.880167	0.998138
BGIBMGA000526	novel protein	7	10	40	0.879762	0.899172
BGIBMGA006318	novel protein	1	2	13	0.879345	0.000159814
gi_112983276	60S ribosomal protein L5 [B.mori]	11	19	113	0.876743	0.94009
gi_114053313	GTP binding protein [B.mori]	13	17	68	0.871766	0.997805
BGIBMGA011416	novel protein	10	22	85	0.864179	0.982684
gi_162952017	Annexin IX isoform C [B.mori]	7	8	38	0.861633	0.965918
BGIBMGA008270	novel protein	1	1	1	0.861514	0.54905
BGIBMGA011577	novel protein	2	2	8	0.854916	0.885714
BGIBMGA004023	novel protein	2	2	4	0.850484	0.7651
BGIBMGA002837	novel protein	1	2	3	0.84076	0.71408
BGIBMGA001800	novel protein	13	20	108	0.837431	0.991804
BGIBMGA013462	novel protein	2	2	3	0.833452	0.872546
BGIBMGA003652	novel protein	9	9	24	0.827321	0.488715
BGIBMGA006257	novel protein	1	1	2	0.826854	0.945017
BGIBMGA007502	novel protein	12	17	81	0.825648	0.997032
BGIBMGA005628	novel protein	3	3	12	0.825004	0.916143
BGIBMGA012946	novel protein	1	1	1	0.82485	0.856028
gi_114053117	eukaryotic translation initiation factor 3 subunit K [B.mori]	1	1	1	0.820956	0.998789
gi_114050789	surfeit 4_like protein [B.mori]	3	5	33	0.816782	0.972696
BGIBMGA011104	novel protein	2	2	2	0.801241	0.726558
BGIBMGA000715	novel protein	5	6	11	0.796733	0.469057
BGIBMGA006964	novel protein	1	1	6	0.791303	0.999182
BGIBMGA008095	novel protein	2	3	5	0.789371	0.780858
gi_24645119	CG8036_ isoform D [D.melanogaster]	2	4	13	0.783988	0.13022
BGIBMGA001301	novel protein	1	1	1	0.775762	0.389106
BGIBMGA004898	novel protein	2	2	11	0.768265	0.23249
BGIBMGA001372	novel protein	4	6	26	0.767224	0.881297
BGIBMGA001638	novel protein	1	2	3	0.762876	0.978818
BGIBMGA006603	novel protein	10	12	32	0.761997	0.907154
BGIBMGA005249	novel protein	3	4	15	0.759421	0.836343
BGIBMGA000029	novel protein	2	3	15	0.758764	0.802617
gi_24647046	suppressor of variegation 3_9_ isoform B [D.melanogaster]	1	1	2	0.755291	0.998521
gi_24647048	suppressor of variegation 3_9_ isoform C [D.melanogaster]	1	1	1	0.755291	0.998521
BGIBMGA013792	novel protein	4	5	34	0.755127	0.567266
BGIBMGA012125	novel protein	1	2	4	0.754118	0.678162
BGIBMGA011948	novel protein	2	14	60	0.749786	0.806024
BGIBMGA002186	novel protein	6	6	24	0.748951	0.891466
BGIBMGA009130	novel protein	2	6	40	0.748419	0.696592
BGIBMGA000802	novel protein	1	1	2	0.744245	0.99841
BGIBMGA013567	novel protein	7	11	65	0.742597	0.858551
BGIBMGA008670	novel protein	9	10	42	0.739731	0.976805
BGIBMGA011218	novel protein	3	3	4	0.738954	0.306376
BGIBMGA006819	novel protein	3	3	29	0.738909	0.626284
BGIBMGA000201	novel protein	1	2	15	0.734212	0.999916
gi_17647897	ribosomal protein S5a [D.melanogaster]	2	2	4	0.733897	0.564741
gi_112984508	translation initiation factor 2 gamma subunit [B.mori]	2	2	5	0.732055	0.791808
gi_21357837	ribosomal protein S5b [D.melanogaster]	3	4	16	0.728108	0.649525
BGIBMGA002644	novel protein	8	16	97	0.72732	0.995988
BGIBMGA010487	novel protein	1	1	7	0.726621	0.00122594
BGIBMGA007571	novel protein	2	2	4	0.724774	0.779122
gi_17137198	ribosomal protein L9_ isoform A [D.melanogaster]	2	2	3	0.722461	0.544768
BGIBMGA009731	novel protein	1	1	4	0.722432	0.152906
BGIBMGA000894	novel protein	1	1	1	0.715009	0.682478
BGIBMGA007710	novel protein	4	5	24	0.712689	0.757273
BGIBMGA005022	novel protein	1	1	3	0.711722	0.956723
BGIBMGA013112	novel protein	3	3	11	0.702353	0.910549
BGIBMGA002972	novel protein	3	4	16	0.701111	0.948801
BGIBMGA001386	novel protein	2	2	4	0.698287	0.0613466
BGIBMGA012168	novel protein	1	1	1	0.696907	0.759478
BGIBMGA013244	novel protein	3	3	6	0.693765	0.824901
BGIBMGA008864	novel protein	1	1	1	0.69376	0.246327
BGIBMGA010970	novel protein	5	6	17	0.691919	0.160543
BGIBMGA004112	novel protein	3	3	7	0.69105	0.794025
BGIBMGA012772	novel protein	6	6	15	0.686648	0.900393
gi_112982822	phosphoglyceromutase [B.mori]	3	3	7	0.684669	0.85359
gi_21355515	atlastin_ isoform A [D.melanogaster]	2	2	4	0.682459	0.843421
BGIBMGA011695	novel protein	1	1	7	0.681612	0.99459
gi_17136504	alpha spectrin [D.melanogaster]	2	2	5	0.681335	0.825276
BGIBMGA005466	novel protein	1	1	2	0.680065	0.871949
BGIBMGA006414	novel protein	5	6	23	0.679719	0.694087
BGIBMGA001238	novel protein	1	2	11	0.670863	0.843263
BGIBMGA008199	novel protein	2	2	3	0.667937	0.750705
BGIBMGA011710	novel protein	10	12	28	0.662798	0.937479
BGIBMGA001725	novel protein	1	2	13	0.661526	0.998522
BGIBMGA012541	novel protein	2	2	4	0.655436	0.623776
gi_17137380	Ef1alpha_like factor [D.melanogaster]	2	2	2	0.652816	0.69617
BGIBMGA000475	novel protein	6	9	56	0.651426	0.238486
BGIBMGA013230	novel protein	1	1	4	0.646845	0.956461
BGIBMGA012159	novel protein	2	2	6	0.642629	0.513293
BGIBMGA009967	novel protein	2	2	10	0.640636	0.587701
gi_114052092	signal peptidase complex subunit 2 [B.mori]	1	2	2	0.637612	0.713276
BGIBMGA006705	novel protein	1	1	3	0.636861	0.9038
BGIBMGA005593	novel protein	5	5	19	0.632247	0.820891
gi_148298713	putative signal recognition particle 68 kDa protein [B.mori]	6	7	27	0.627471	0.885161
BGIBMGA014059	novel protein	1	1	2	0.626985	0.523591
BGIBMGA011620	novel protein	3	35	211	0.612369	0.99595
BGIBMGA006809	novel protein	9	11	52	0.607243	0.985936
BGIBMGA014287	novel protein	1	1	1	0.601259	0.6595
BGIBMGA014589	novel protein	5	5	12	0.601051	0.814438
BGIBMGA004911	novel protein	3	3	6	0.59953	0.0915258
BGIBMGA010867	novel protein	11	11	77	0.598993	0.93198
BGIBMGA005752	novel protein	4	4	14	0.592749	0.564328
BGIBMGA007230	novel protein	3	5	27	0.59031	0.982175
gi_114050837	eukaryotic translation initiation factor 4E_binding protein 2 [B.mori]	1	1	4	0.589989	0.130298
BGIBMGA010671	novel protein	5	5	16	0.586286	0.928226
BGIBMGA012665	novel protein	1	1	3	0.582212	0.723615
BGIBMGA004196	novel protein	1	1	10	0.55789	0.450874
BGIBMGA001070	novel protein	2	3	16	0.555479	0.976415
BGIBMGA008554	novel protein	1	2	2	0.551119	0.787183
BGIBMGA012045	novel protein	1	1	2	0.547557	0.217713
BGIBMGA013394	novel protein	1	1	1	0.547089	0.369625
BGIBMGA014181	novel protein	2	3	6	0.546517	0.838859
BGIBMGA007114	novel protein	1	1	6	0.545156	0.98616
gi_112983184	eukaryotic translation initiation factor 3 subunit B [B.mori]	1	1	4	0.545156	0.98616
BGIBMGA003243	novel protein	1	1	1	0.540823	0.462732
BGIBMGA005853	novel protein	2	2	9	0.535922	0.833433
BGIBMGA000710	novel protein	3	3	12	0.530034	0.669551
BGIBMGA009411	novel protein	8	10	47	0.528867	0.935022
gi_17864182	ADP ribosylation factor 102F [D.melanogaster]	3	3	4	0.526918	0.860153
gi_221460930	CG42233 [D.melanogaster]	1	1	1	0.517351	0.614611
BGIBMGA008894	novel protein	4	4	9	0.50855	0.930909
BGIBMGA008226	novel protein	2	3	4	0.504183	0.768068
BGIBMGA004711	novel protein	1	2	4	0.503737	0.845192
gi_162462178	Ef1alpha_like factor isoform 2 [B.mori]	2	2	3	0.50233	0.964098
BGIBMGA003549	novel protein	1	1	1	0.501999	0.62001
BGIBMGA014418	novel protein	1	1	10	0.500241	0.879971
BGIBMGA002406	novel protein	1	1	1	0.498226	0.626801
BGIBMGA002713	novel protein	1	1	4	0.497042	0.072209
BGIBMGA003717	novel protein	2	2	4	0.496831	0.752969
BGIBMGA005347	novel protein	5	6	54	0.494073	0.986981
gi_17136866	ADP ribosylation factor 79F_ isoform B [D.melanogaster]	5	6	25	0.494073	0.986981
BGIBMGA004395	novel protein	1	1	8	0.490454	0.951248
BGIBMGA012414	novel protein	4	10	51	0.486942	0.967958
BGIBMGA004980	novel protein	2	2	3	0.484396	0.714499
BGIBMGA001797	novel protein	1	1	1	0.479292	0.61998
BGIBMGA011819	novel protein	2	2	15	0.475928	0.875764
BGIBMGA003923	novel protein	4	11	58	0.467245	0.74096
BGIBMGA006109	novel protein	1	1	6	0.463966	0.897554
BGIBMGA010088	novel protein	1	1	1	0.460891	0.622748
BGIBMGA000062	novel protein	1	1	8	0.458727	0.90547
BGIBMGA014039	novel protein	2	2	12	0.455393	0.497653
gi_114051868	hydroxysteroid dehydrogenase [B.mori]	3	4	14	0.448776	0.942016
BGIBMGA005464	novel protein	1	1	3	0.44824	0.799499
BGIBMGA012775	novel protein	1	1	1	0.447949	0.563588
BGIBMGA008347	novel protein	1	1	4	0.446774	0.816262
BGIBMGA010827	novel protein	1	1	1	0.443819	0.611183
BGIBMGA009874	novel protein	2	2	7	0.443382	0.631845
BGIBMGA007594	novel protein	3	3	8	0.433905	0.81552
BGIBMGA007144	novel protein	3	3	3	0.42821	0.679308
BGIBMGA009234	novel protein	4	4	7	0.414756	0.741904
BGIBMGA001194	novel protein	5	6	24	0.413501	0.807564
BGIBMGA008312	novel protein	3	3	5	0.409235	0.725956
BGIBMGA002790	novel protein	1	1	2	0.408334	0.669
BGIBMGA001395	novel protein	2	2	11	0.408146	0.777397
BGIBMGA002984	novel protein	2	2	2	0.407463	0.625191
gi_115345341	receptor for activated protein kinase C RACK 1 isoform 1 [B.mori]	13	18	84	0.404359	0.970081
BGIBMGA008565	novel protein	1	2	3	0.400873	0.744715
BGIBMGA009000	novel protein	1	1	3	0.39973	0.794755
gi_17137288	succinate dehydrogenase A_ isoform A [D.melanogaster]	1	1	3	0.39973	0.794755
BGIBMGA009900	novel protein	1	1	1	0.398895	0.582709
gi_17738047	vibrator [D.melanogaster]	1	1	6	0.397686	0.648509
BGIBMGA014129	novel protein	1	1	2	0.395396	0.696943
BGIBMGA006789	novel protein	2	2	7	0.393559	0.655816
gi_309384283	kinesin heavy chain [B.mori]	5	5	8	0.392671	0.974339
BGIBMGA004881	novel protein	1	1	2	0.392645	0.508146
BGIBMGA000944	novel protein	4	13	104	0.392482	0.988691
BGIBMGA007418	novel protein	4	6	27	0.387054	0.856391
BGIBMGA010723	novel protein	2	2	4	0.386178	0.673239
BGIBMGA000528	novel protein	2	2	7	0.385616	0.700385
BGIBMGA011477	novel protein	2	2	6	0.38527	0.569796
BGIBMGA001037	novel protein	5	6	28	0.384961	0.928884
BGIBMGA003671	novel protein	2	2	10	0.382516	0.568429
BGIBMGA000288	novel protein	2	2	11	0.367462	0.799082
BGIBMGA001929	novel protein	1	1	2	0.36521	0.5072
BGIBMGA007743	novel protein	5	7	34	0.362583	0.860688
BGIBMGA000672	novel protein	5	5	34	0.360681	0.953028
BGIBMGA007294	novel protein	1	1	1	0.356873	0.54473
BGIBMGA014094	novel protein	5	6	28	0.355094	0.906138
BGIBMGA000504	novel protein	1	2	6	0.349993	0.771669
BGIBMGA008228	novel protein	1	1	3	0.348207	0.749086
BGIBMGA005702	novel protein	1	1	1	0.341694	0.487531
BGIBMGA009992	novel protein	5	5	13	0.340514	0.73583
gi_112984376	ribosomal protein L14 [B.mori]	4	8	25	0.340169	0.869596
BGIBMGA004090	novel protein	3	3	17	0.338932	0.977592
gi_290562453	H_ transporting ATP synthase O subunit isoform 2 [B.mori]	3	4	10	0.338745	0.957852
gi_306518662	phenylalanyl_tRNA synthetase alpha subunit [B.mori]	2	3	11	0.338138	0.78072
BGIBMGA008825	novel protein	1	1	2	0.336162	0.651604
BGIBMGA010794	novel protein	3	3	15	0.335148	0.815064
BGIBMGA003787	novel protein	1	1	2	0.328605	0.591365
BGIBMGA013678	novel protein	1	1	1	0.324259	0.553985
gi_112983366	protein disulfide_isomerase like protein ERp57 precursor [B.mori]	5	5	12	0.324103	0.810407
BGIBMGA008391	novel protein	2	2	5	0.317804	0.597641
BGIBMGA005267	novel protein	1	1	1	0.317738	0.363746
BGIBMGA004908	novel protein	4	4	10	0.316991	0.838319
BGIBMGA009834	novel protein	1	1	1	0.314328	0.543125
BGIBMGA009099	novel protein	1	2	6	0.310046	0.754387
BGIBMGA004846	novel protein	3	4	11	0.309177	0.893656
gi_17981711	upstream of RpIII128 [D.melanogaster]	2	3	17	0.308524	0.945862
gi_17136240	kinesin heavy chain [D.melanogaster]	2	4	17	0.301031	0.948405
BGIBMGA003178	novel protein	1	1	2	0.297853	0.483509
BGIBMGA013860	novel protein	1	1	10	0.297223	0.365988
BGIBMGA002423	novel protein	3	4	18	0.29608	0.681485
BGIBMGA008425	novel protein	1	1	1	0.294511	0.445392
BGIBMGA007720	novel protein	4	4	8	0.293688	0.770221
BGIBMGA001458	novel protein	1	1	6	0.293127	0.7822
BGIBMGA007469	novel protein	6	8	23	0.293032	0.79543
BGIBMGA014040	novel protein	2	2	5	0.291764	0.489789
BGIBMGA004540	novel protein	2	2	4	0.288388	0.619048
gi_17647429	fimbrin_ isoform A [D.melanogaster]	1	1	2	0.287378	0.578421
BGIBMGA006426	novel protein	1	2	7	0.286503	0.699672
BGIBMGA006141	novel protein	2	3	20	0.286084	0.845869
BGIBMGA000367	novel protein	2	3	12	0.281002	0.723374
gi_296434207	target of rapamycin isoform 2 [B.mori]	1	1	1	0.273995	0.493526
BGIBMGA012437	novel protein	5	6	18	0.27387	0.805539
BGIBMGA001849	novel protein	8	8	35	0.273805	0.93828
gi_112983134	heat shock protein hsp20.1 [B.mori]	2	2	3	0.271611	0.624528
BGIBMGA006867	novel protein	5	5	14	0.271189	0.746034
BGIBMGA011504	novel protein	6	9	61	0.267007	0.975048
BGIBMGA006941	novel protein	6	6	29	0.266024	0.884282
BGIBMGA010644	novel protein	3	3	12	0.264574	0.534381
gi_17136276	Aspartyl_tRNA synthetase [D.melanogaster]	3	3	7	0.263756	0.70858
BGIBMGA013537	novel protein	1	1	1	0.262162	0.516489
BGIBMGA014000	novel protein	1	1	1	0.260421	0.497841
BGIBMGA014121	novel protein	1	1	2	0.257691	0.608916
BGIBMGA008442	novel protein	1	1	1	0.257131	0.58227
gi_19921944	CG1516_ isoform E [D.melanogaster]	1	1	1	0.257131	0.58227
BGIBMGA013364	novel protein	1	1	1	0.255426	0.52004
gi_24645179	Tcp_1eta [D.melanogaster]	2	2	5	0.254537	0.663779
BGIBMGA010571	novel protein	7	9	30	0.251173	0.894396
BGIBMGA000819	novel protein	2	2	3	0.2509	0.612144
BGIBMGA004061	novel protein	2	2	5	0.250885	0.588743
BGIBMGA008004	novel protein	1	1	1	0.25079	0.374419
BGIBMGA007723	novel protein	4	6	10	0.250262	0.731013
BGIBMGA006851	novel protein	1	1	1	0.249574	0.432966
BGIBMGA010000	novel protein	3	3	17	0.249354	0.636772
BGIBMGA004379	novel protein	1	1	10	0.248679	0.837229
BGIBMGA011282	novel protein	6	10	46	0.244431	0.89907
BGIBMGA011337	novel protein	1	1	5	0.242269	0.748274
BGIBMGA004706	novel protein	2	2	3	0.24226	0.510232
BGIBMGA003972	novel protein	3	4	15	0.241175	0.830051
gi_19921728	CG11107 [D.melanogaster]	1	1	4	0.240842	0.70044
BGIBMGA011087	novel protein	1	1	4	0.238454	0.673008
gi_19923034	Sac1_ isoform A [D.melanogaster]	1	1	1	0.237376	0.338255
BGIBMGA001707	novel protein	5	6	27	0.235807	0.986052
gi_24650984	Rpn2 [D.melanogaster]	1	1	5	0.232117	0.743013
BGIBMGA010595	novel protein	1	1	2	0.231451	0.606779
BGIBMGA001643	novel protein	1	1	4	0.229284	0.301846
BGIBMGA011029	novel protein	2	3	11	0.225947	0.782623
BGIBMGA007119	novel protein	4	4	16	0.225416	0.843208
BGIBMGA014177	novel protein	5	5	15	0.223923	0.803515
BGIBMGA001644	novel protein	1	2	11	0.219972	0.805755
BGIBMGA009396	novel protein	1	1	1	0.217948	0.455956
BGIBMGA004059	novel protein	1	2	15	0.212762	0.864281
gi_24650776	beta_Tubulin at 97EF_ isoform A [D.melanogaster]	5	5	19	0.212749	0.968053
BGIBMGA003335	novel protein	3	3	18	0.212385	0.871647
BGIBMGA003910	novel protein	1	1	1	0.209851	0.434381
BGIBMGA008066	novel protein	4	4	11	0.208	0.768591
gi_112983114	seroin 2 precursor [B.mori]	2	2	9	0.207053	0.761753
BGIBMGA007079	novel protein	5	6	25	0.206169	0.895583
BGIBMGA014136	novel protein	2	2	6	0.203662	0.729762
BGIBMGA007092	novel protein	3	3	12	0.200613	0.741638
BGIBMGA001461	novel protein	2	2	9	0.198279	0.73965
BGIBMGA010591	novel protein	1	1	1	0.197953	0.468035
BGIBMGA009045	novel protein	1	1	4	0.197809	0.65896
BGIBMGA009241	novel protein	1	1	5	0.197142	0.529749
BGIBMGA011589	novel protein	2	2	6	0.196481	0.586434
BGIBMGA012295	novel protein	1	1	1	0.194732	0.613196
gi_17647249	Cdc42_ isoform A [D.melanogaster]	1	1	2	0.194732	0.613196
BGIBMGA011306	novel protein	1	1	1	0.192583	0.487153
gi_24647885	14_3_3epsilon_ isoform A [D.melanogaster]	3	4	16	0.190395	0.954191
BGIBMGA011493	novel protein	1	1	6	0.188416	0.683129
BGIBMGA005409	novel protein	1	1	6	0.186928	0.715497
gi_162462398	hnRNPA/B_like 28 [B.mori]	2	2	2	0.186157	0.642466
BGIBMGA007971	novel protein	1	2	11	0.183659	0.645812
BGIBMGA004852	novel protein	5	5	17	0.182062	0.796654
gi_17647949	signal recognition particle protein 54k [D.melanogaster]	1	1	8	0.179084	0.750456
BGIBMGA006866	novel protein	2	2	13	0.176214	0.842611
BGIBMGA008426	novel protein	3	3	20	0.175703	0.90703
BGIBMGA006081	novel protein	1	1	1	0.175675	0.473448
BGIBMGA012707	novel protein	1	1	7	0.174242	0.736805
BGIBMGA002981	novel protein	5	9	47	0.173584	0.954375
BGIBMGA012448	novel protein	1	1	1	0.171234	0.461367
BGIBMGA012953	novel protein	1	1	5	0.171198	0.673159
BGIBMGA005592	novel protein	2	3	9	0.166043	0.668703
BGIBMGA005395	novel protein	1	1	11	0.163145	0.786904
BGIBMGA002569	novel protein	3	4	20	0.16106	0.73389
BGIBMGA007905	novel protein	1	1	1	0.160503	0.468209
BGIBMGA007904	novel protein	1	1	2	0.160326	0.510665
BGIBMGA006462	novel protein	1	1	1	0.157472	0.460497
BGIBMGA012145	novel protein	1	1	1	0.156638	0.426758
BGIBMGA007639	novel protein	3	3	4	0.155752	0.809565
gi_160333278	mitochondrial phosphoenolpyruvate carboxykinase isoform 2 [B.mori]	3	3	4	0.155388	0.758385
BGIBMGA005758	novel protein	1	1	2	0.153077	0.558974
gi_17647887	ribosomal protein LP2_ isoform A [D.melanogaster]	1	1	4	0.152606	0.629855
BGIBMGA014503	novel protein	1	1	2	0.152125	0.532074
BGIBMGA010577	novel protein	1	1	1	0.151982	0.466595
gi_148298791	signal recognition particle 14 kDa protein_like protein [B.mori]	1	1	1	0.151532	0.461755
BGIBMGA007656	novel protein	2	2	12	0.149784	0.777904
BGIBMGA003212	novel protein	4	5	24	0.14915	0.899222
BGIBMGA008051	novel protein	2	2	4	0.148241	0.624518
BGIBMGA005328	novel protein	2	3	17	0.144976	0.793155
BGIBMGA008477	novel protein	1	1	6	0.143992	0.682621
gi_62862338	CG17514_ isoform A [D.melanogaster]	1	1	3	0.140801	0.669211
BGIBMGA003978	novel protein	4	5	21	0.138554	0.820902
BGIBMGA002439	novel protein	1	1	3	0.138348	0.590276
BGIBMGA003319	novel protein	2	2	11	0.138267	0.734328
BGIBMGA010139	novel protein	2	2	5	0.13822	0.572427
BGIBMGA007822	novel protein	1	1	6	0.138139	0.687078
BGIBMGA006045	novel protein	1	2	8	0.1374	0.681739
BGIBMGA003609	novel protein	1	1	3	0.134693	0.594649
BGIBMGA010247	novel protein	1	2	9	0.1337	0.751332
gi_114052088	vacuolar ATP synthase subunit E [B.mori]	1	1	2	0.1337	0.751332
gi_112983980	ribosomal protein S19 [B.mori]	3	3	19	0.132816	0.733462
BGIBMGA009814	novel protein	1	1	2	0.132701	0.5349
gi_114051996	nonclathrin coat protein zeta 1_COP [B.mori]	1	2	6	0.132621	0.646383
BGIBMGA011625	novel protein	1	1	1	0.132524	0.322631
BGIBMGA008087	novel protein	2	2	3	0.13192	0.557051
BGIBMGA012967	novel protein	1	1	1	0.128393	0.448695
BGIBMGA004573	novel protein	1	1	5	0.127956	0.632174
BGIBMGA005656	novel protein	2	3	19	0.125988	0.804713
BGIBMGA003587	novel protein	7	7	18	0.125822	0.802693
BGIBMGA003221	novel protein	1	1	6	0.12533	0.672917
BGIBMGA005289	novel protein	1	1	8	0.125111	0.522438
BGIBMGA003468	novel protein	1	1	2	0.125001	0.469205
BGIBMGA012532	novel protein	1	1	5	0.123478	0.645692
BGIBMGA008847	novel protein	2	4	18	0.122403	0.794528
gi_153792009	heterogeneous nuclear ribonucleoprotein A1 [B.mori]	2	2	3	0.12172	0.708419
gi_17864292	aconitase_ isoform B [D.melanogaster]	1	1	1	0.121506	0.53643
gi_28571643	CG4706 [D.melanogaster]	1	1	1	0.121506	0.53643
BGIBMGA004396	novel protein	1	1	1	0.119196	0.449158
gi_24638724	unc_13_ isoform B [D.melanogaster]	1	1	1	0.119196	0.449158
BGIBMGA011168	novel protein	6	8	30	0.118454	0.889513
BGIBMGA001490	novel protein	7	9	45	0.11742	0.90637
BGIBMGA011297	novel protein	1	1	1	0.117136	0.45247
BGIBMGA011599	novel protein	2	4	33	0.116734	0.865999
BGIBMGA013895	novel protein	1	1	3	0.115505	0.565527
BGIBMGA002759	novel protein	2	2	8	0.115502	0.651439
BGIBMGA013634	novel protein	1	1	2	0.115315	0.553926
BGIBMGA013635	novel protein	1	1	2	0.115315	0.553926
gi_112983388	FK506_binding protein FKBP59 homologue [B.mori]	1	1	3	0.115315	0.553926
BGIBMGA005126	novel protein	1	1	1	0.115241	0.440939
BGIBMGA012931	novel protein	1	1	1	0.113335	0.434215
BGIBMGA002818	novel protein	1	1	2	0.113291	0.514269
BGIBMGA006981	novel protein	1	1	1	0.112949	0.448591
gi_24661332	CG5144 [D.melanogaster]	1	2	5	0.112527	0.628447
BGIBMGA013157	novel protein	5	10	67	0.108658	0.911981
BGIBMGA002898	novel protein	1	1	1	0.10844	0.454049
BGIBMGA011922	novel protein	3	3	6	0.108114	0.605512
BGIBMGA010193	novel protein	2	2	5	0.107992	0.638192
BGIBMGA000848	novel protein	1	1	1	0.106532	0.415232
BGIBMGA012560	novel protein	3	3	8	0.106292	0.680882
BGIBMGA010574	novel protein	1	1	1	0.10464	0.419216
BGIBMGA006401	novel protein	1	1	7	0.101853	0.669371
BGIBMGA010154	novel protein	2	2	5	0.101066	0.621331
BGIBMGA005250	novel protein	1	1	2	0.100323	0.507815
BGIBMGA009382	novel protein	1	1	8	0.098655	0.683781
gi_17137654	enolase_ isoform A [D.melanogaster]	1	2	3	0.0969146	0.609006
gi_24648682	Rab_protein 1 [D.melanogaster]	2	2	3	0.0968981	0.902309
gi_21356433	eukaryotic release factor 1_ isoform A [D.melanogaster]	5	5	11	0.0962102	0.835373
BGIBMGA014398	novel protein	3	3	5	0.0958218	0.77971
BGIBMGA005319	novel protein	1	1	4	0.0949172	0.57828
BGIBMGA008829	novel protein	1	1	10	0.0948293	0.699398
BGIBMGA006405	novel protein	2	2	6	0.0935921	0.65748
BGIBMGA005841	novel protein	1	1	1	0.0934307	0.437391
BGIBMGA003718	novel protein	2	4	24	0.0934136	0.777019
BGIBMGA012839	novel protein	3	4	38	0.0933521	0.912534
BGIBMGA012472	novel protein	1	1	2	0.0930951	0.509316
BGIBMGA014456	novel protein	1	2	4	0.0927395	0.578989
BGIBMGA006779	novel protein	1	1	1	0.0927372	0.430609
gi_21355917	Chd64 [D.melanogaster]	1	1	1	0.091923	0.617404
gi_24652322	14_3_3zeta_ isoform D [D.melanogaster]	2	4	12	0.0915994	0.94174
BGIBMGA004857	novel protein	1	1	1	0.0901037	0.444944
BGIBMGA009647	novel protein	5	16	79	0.0894017	0.951523
BGIBMGA001406	novel protein	8	8	20	0.0877527	0.791328
gi_24665272	roquin [D.melanogaster]	1	1	1	0.0876836	0.43846
gi_21355081	delta_coatomer protein_ isoform A [D.melanogaster]	1	1	11	0.0871938	0.801818
BGIBMGA004231	novel protein	1	1	2	0.0857674	0.508863
BGIBMGA012833	novel protein	2	2	5	0.0840512	0.618187
BGIBMGA008596	novel protein	1	2	5	0.0836875	0.598067
BGIBMGA007159	novel protein	1	1	2	0.0827629	0.504704
BGIBMGA003519	novel protein	3	3	7	0.0826448	0.601097
BGIBMGA010538	novel protein	1	1	1	0.0821184	0.44175
gi_306518664	carboxyl/cholinesterase 7 precursor [B.mori]	1	1	2	0.0817445	0.664502
gi_148298697	eukaryotic initiation factor 5C [B.mori]	1	1	1	0.0812738	0.438267
BGIBMGA012126	novel protein	2	2	3	0.0809061	0.550814
BGIBMGA012860	novel protein	1	1	1	0.0805816	0.432226
BGIBMGA012981	novel protein	3	3	22	0.0805228	0.830291
gi_17136728	heterogeneous nuclear ribonucleoprotein at 27C_ isoform A [D.melanogaster]	1	1	1	0.0804241	0.441056
BGIBMGA007412	novel protein	1	2	3	0.0802515	0.535432
BGIBMGA013963	novel protein	1	1	2	0.0799582	0.652341
gi_17137392	vacuolar H[_] ATPase 44kD C subunit_ isoform A [D.melanogaster]	1	1	4	0.0799582	0.652341
BGIBMGA004776	novel protein	1	1	1	0.0797778	0.432592
BGIBMGA007267	novel protein	1	1	2	0.0793112	0.512931
BGIBMGA010906	novel protein	1	1	6	0.0787289	0.611517
BGIBMGA012512	novel protein	2	2	6	0.0786902	0.639468
gi_115292419	glutamate synthase [B.mori]	7	7	12	0.0784098	0.833009
BGIBMGA009863	novel protein	4	6	29	0.0783517	0.850322
gi_114052402	eukaryotic translation termination factor 1 [B.mori]	5	5	12	0.0780609	0.84105
BGIBMGA000918	novel protein	2	2	7	0.0780257	0.64626
BGIBMGA005116	novel protein	2	2	3	0.0769009	0.545721
BGIBMGA009535	novel protein	1	1	1	0.0762908	0.440148
BGIBMGA014605	novel protein	1	1	1	0.075263	0.431015
BGIBMGA005928	novel protein	1	1	1	0.0751761	0.429027
gi_17737927	proteasome 25kD subunit [D.melanogaster]	1	1	1	0.0749115	0.436218
BGIBMGA011604	novel protein	1	1	4	0.0746611	0.580591
BGIBMGA009829	novel protein	1	1	1	0.0743472	0.452364
BGIBMGA013168	novel protein	1	1	1	0.0741259	0.440669
BGIBMGA006733	novel protein	1	1	1	0.0734451	0.413976
BGIBMGA003597	novel protein	4	5	23	0.0728227	0.797308
BGIBMGA002626	novel protein	1	1	1	0.0726539	0.413082
BGIBMGA003397	novel protein	7	11	77	0.0726387	0.942058
BGIBMGA007681	novel protein	3	3	5	0.0723305	0.61071
gi_17136980	tropomodulin_ isoform A [D.melanogaster]	1	1	1	0.0722964	0.439185
BGIBMGA010972	novel protein	1	1	1	0.0717787	0.425245
BGIBMGA012983	novel protein	3	3	15	0.0716846	0.730092
BGIBMGA007665	novel protein	1	1	2	0.0716128	0.505157
gi_153792659	actin_depolymerizing factor 1 [B.mori]	4	6	50	0.0711771	0.908274
gi_24647510	cctgamma_ isoform A [D.melanogaster]	1	1	2	0.0702777	0.658682
BGIBMGA009845	novel protein	2	2	6	0.0702638	0.615815
BGIBMGA005559	novel protein	1	1	1	0.0702167	0.429796
BGIBMGA007747	novel protein	1	1	1	0.0700143	0.436303
BGIBMGA014607	novel protein	2	2	3	0.069615	0.554459
gi_148298671	signal peptidase complex subunit 3 [B.mori]	3	3	15	0.0693941	0.771981
BGIBMGA001855	novel protein	1	1	1	0.0693938	0.439805
BGIBMGA003637	novel protein	1	1	1	0.0692887	0.447286
BGIBMGA007453	novel protein	2	2	9	0.0689081	0.709492
gi_17975567	ribosomal protein S15Aa_ isoform D [D.melanogaster]	1	1	2	0.0688094	0.483921
BGIBMGA001877	novel protein	1	1	1	0.0682041	0.435505
BGIBMGA003001	novel protein	1	1	2	0.0681696	0.5089
gi_19920362	Sec61gamma [D.melanogaster]	1	1	1	0.0671616	0.43978
BGIBMGA010642	novel protein	1	1	2	0.0671189	0.47964
gi_114050729	vacuolar ATPase subunit C [B.mori]	2	2	4	0.0668143	0.684551
gi_114053127	aspartate aminotransferase [B.mori]	6	6	25	0.0664753	0.840755
gi_24641071	raspberry_ isoform A [D.melanogaster]	1	1	2	0.066239	0.503348
BGIBMGA001241	novel protein	3	3	6	0.0661407	0.640224
BGIBMGA012429	novel protein	2	2	7	0.0657037	0.693747
gi_17737302	adenine nucleotide translocase 2_ isoform A [D.melanogaster]	1	1	2	0.0652381	0.835334
BGIBMGA004009	novel protein	2	2	3	0.0650397	0.544556
BGIBMGA002914	novel protein	1	2	6	0.065	0.583084
gi_114050851	tetraspanin E [B.mori]	1	1	4	0.0648669	0.549324
BGIBMGA012550	novel protein	3	3	11	0.0644067	0.811656
BGIBMGA008408	novel protein	1	1	1	0.0639296	0.430482
BGIBMGA001928	novel protein	1	1	1	0.0632578	0.431563
BGIBMGA014144	novel protein	2	2	4	0.0630353	0.608706
gi_17737967	heat shock protein cognate 4_ isoform A [D.melanogaster]	4	5	11	0.0629142	0.912643
gi_45551115	three rows [D.melanogaster]	1	1	2	0.0627621	0.50294
gi_19921722	CG11060 [D.melanogaster]	1	1	1	0.0627255	0.435022
BGIBMGA001402	novel protein	1	1	4	0.0627141	0.630306
gi_21356589	CG11899 [D.melanogaster]	1	1	4	0.0625571	0.676711
BGIBMGA000064	novel protein	1	1	10	0.0622131	0.676749
BGIBMGA012626	novel protein	6	10	46	0.0620106	0.935025
BGIBMGA007605	novel protein	1	1	2	0.061692	0.483903
BGIBMGA007247	novel protein	1	1	1	0.0616096	0.436378
gi_114053141	exuperantia [B.mori]	4	5	8	0.0612673	0.814497
BGIBMGA008405	novel protein	1	1	1	0.0612039	0.435149
BGIBMGA006523	novel protein	1	2	4	0.0610561	0.544741
BGIBMGA013348	novel protein	1	1	3	0.0609649	0.54285
BGIBMGA010352	novel protein	1	1	1	0.0609231	0.43692
BGIBMGA000516	novel protein	1	1	3	0.060531	0.522174
gi_24649027	Tcp1_like_ isoform A [D.melanogaster]	1	1	1	0.0598783	0.643558
gi_114052797	signal peptidase 18 kDa subunit [B.mori]	4	4	13	0.0595174	0.84446
BGIBMGA010396	novel protein	1	1	2	0.0593504	0.648908
BGIBMGA004175	novel protein	4	4	17	0.0590016	0.772667
gi_21358039	CG5642 [D.melanogaster]	1	1	2	0.0587114	0.50044
gi_24641760	CG1640_ isoform A [D.melanogaster]	1	1	3	0.0565867	0.537155
BGIBMGA003028	novel protein	2	2	8	0.0560192	0.669119
BGIBMGA013133	novel protein	5	5	18	0.0557954	0.790316
BGIBMGA009021	novel protein	2	2	4	0.0557377	0.578743
gi_17136986	twinstar [D.melanogaster]	1	1	2	0.0556571	0.662483
BGIBMGA001407	novel protein	1	1	1	0.0554801	0.430527
gi_112984118	ribosomal protein L39 [B.mori]	1	1	2	0.0554245	0.486392
BGIBMGA014087	novel protein	4	4	14	0.0549496	0.714433
BGIBMGA004010	novel protein	1	1	1	0.0548332	0.424118
BGIBMGA011822	novel protein	1	2	11	0.0547919	0.594995
BGIBMGA003833	novel protein	3	3	14	0.0543847	0.706818
BGIBMGA004833	novel protein	1	1	2	0.0543167	0.500713
BGIBMGA008828	novel protein	1	1	7	0.0542793	0.644261
BGIBMGA011500	novel protein	2	2	5	0.0538021	0.616076
BGIBMGA004847	novel protein	2	2	4	0.0536875	0.596603
BGIBMGA003311	novel protein	1	1	1	0.0524078	0.431379
BGIBMGA001556	novel protein	1	1	2	0.0523454	0.497982
BGIBMGA010959	novel protein	3	5	15	0.0521752	0.708785
BGIBMGA006751	novel protein	4	4	17	0.0520683	0.757322
gi_24649832	CG11089_ isoform A [D.melanogaster]	2	2	8	0.0519304	0.857336
gi_17864162	ribosomal protein S3A_ isoform A [D.melanogaster]	1	1	2	0.0518098	0.478603
gi_24641191	heat shock protein 60_ isoform A [D.melanogaster]	2	2	10	0.0517134	0.751443
BGIBMGA006221	novel protein	2	3	8	0.051611	0.814353
BGIBMGA012659	novel protein	1	1	2	0.0507486	0.493156
BGIBMGA007795	novel protein	3	4	24	0.0505436	0.822905
BGIBMGA012505	novel protein	1	1	6	0.0503909	0.61918
BGIBMGA009778	novel protein	1	1	1	0.0503865	0.426314
gi_114052086	proteasome 26S non_ATPase subunit 12 [B.mori]	1	1	2	0.0499973	0.565857
BGIBMGA014536	novel protein	2	3	11	0.0494637	0.908611
gi_24581334	CG17259 [D.melanogaster]	3	3	6	0.0491207	0.807677
BGIBMGA008682	novel protein	1	1	2	0.0486495	0.499368
BGIBMGA013544	novel protein	1	1	1	0.0485612	0.428057
BGIBMGA007477	novel protein	12	15	27	0.0484893	0.983537
gi_45549423	CG1434 [D.melanogaster]	1	1	1	0.0483274	0.435361
BGIBMGA007509	novel protein	1	1	1	0.0481884	0.434951
BGIBMGA011581	novel protein	1	1	5	0.0480955	0.589322
BGIBMGA006450	novel protein	1	1	2	0.0480885	0.502867
gi_17136898	walrus_ isoform B [D.melanogaster]	1	1	1	0.0480865	0.425591
BGIBMGA008223	novel protein	1	1	1	0.0477271	0.415096
BGIBMGA007824	novel protein	2	2	2	0.0474931	0.494717
BGIBMGA008209	novel protein	1	1	2	0.0473783	0.50111
BGIBMGA006583	novel protein	1	1	4	0.0471328	0.55793
BGIBMGA009107	novel protein	1	1	3	0.0470819	0.534697
BGIBMGA006772	novel protein	1	1	6	0.046929	0.595421
BGIBMGA012380	novel protein	1	1	1	0.0467962	0.436277
BGIBMGA005684	novel protein	2	2	6	0.0467575	0.690723
BGIBMGA008706	novel protein	3	3	13	0.0465877	0.684937
BGIBMGA009726	novel protein	1	1	7	0.0464365	0.609712
BGIBMGA012961	novel protein	1	1	4	0.0460738	0.567179
BGIBMGA003490	novel protein	1	1	1	0.0459661	0.429273
BGIBMGA006085	novel protein	5	5	15	0.045852	0.75508
BGIBMGA005931	novel protein	1	1	1	0.0452947	0.426974
BGIBMGA011357	novel protein	2	2	3	0.0448254	0.538993
BGIBMGA014417	novel protein	1	1	1	0.0447298	0.425779
BGIBMGA006841	novel protein	1	2	5	0.0442478	0.734994
gi_17157991	thioredoxin peroxidase 1_ isoform A [D.melanogaster]	1	1	1	0.0430252	0.634085
BGIBMGA003340	novel protein	1	1	4	0.0429743	0.563463
BGIBMGA009794	novel protein	4	4	7	0.0425374	0.63891
gi_24648520	CG17838_ isoform E [D.melanogaster]	2	2	8	0.0425132	0.721291
BGIBMGA007512	novel protein	1	1	4	0.0424989	0.567045
gi_24660351	CG12262 [D.melanogaster]	3	3	5	0.0423309	0.681698
BGIBMGA000390	novel protein	2	3	8	0.0421332	0.734885
BGIBMGA000806	novel protein	1	1	1	0.0419096	0.429107
BGIBMGA000943	novel protein	1	1	4	0.0418575	0.562636
BGIBMGA012546	novel protein	4	4	12	0.0417642	0.764955
BGIBMGA009751	novel protein	5	6	33	0.0415792	0.83499
BGIBMGA004691	novel protein	1	1	2	0.0415208	0.491913
BGIBMGA005023	novel protein	1	1	3	0.0413097	0.530777
BGIBMGA013511	novel protein	2	2	10	0.0412766	0.707984
gi_114052408	mitochondrial aldehyde dehydrogenase [B.mori]	6	6	13	0.0410559	0.766512
BGIBMGA002594	novel protein	1	1	4	0.0410431	0.561893
gi_20129479	CG5075 [D.melanogaster]	1	1	4	0.0409358	0.651235
BGIBMGA005965	novel protein	2	2	3	0.0405924	0.542378
BGIBMGA007906	novel protein	1	1	1	0.0403546	0.424878
gi_24583049	GDP dissociation inhibitor [D.melanogaster]	1	1	1	0.0402072	0.565475
gi_221331185	synaptotagmin beta_ isoform C [D.melanogaster]	1	1	1	0.0401708	0.316291
BGIBMGA007935	novel protein	4	4	7	0.0400794	0.616595
BGIBMGA004824	novel protein	2	2	3	0.0397242	0.542556
BGIBMGA002572	novel protein	5	8	47	0.0395828	0.882635
BGIBMGA008556	novel protein	4	4	7	0.0393389	0.652493
BGIBMGA000926	novel protein	4	4	5	0.0392531	0.589798
BGIBMGA001953	novel protein	1	1	1	0.0391644	0.425467
BGIBMGA010068	novel protein	2	2	3	0.0388376	0.536605
BGIBMGA013449	novel protein	2	3	11	0.0388323	0.774046
gi_19922746	ribosomal protein S16 [D.melanogaster]	3	4	14	0.0386609	0.749175
BGIBMGA001991	novel protein	2	3	15	0.0385286	0.7409
BGIBMGA010839	novel protein	2	2	4	0.0382058	0.563346
BGIBMGA010785	novel protein	1	1	1	0.0380969	0.427323
BGIBMGA004376	novel protein	1	1	6	0.0380343	0.595877
gi_112984394	ribosomal protein S16 [B.mori]	5	5	7	0.0379742	0.849804
BGIBMGA002296	novel protein	1	1	3	0.0379199	0.532261
BGIBMGA009933	novel protein	1	1	1	0.0376697	0.426186
BGIBMGA011803	novel protein	1	1	1	0.0373608	0.424289
BGIBMGA001319	novel protein	2	2	9	0.0372974	0.718161
gi_17647231	calmodulin_ isoform A [D.melanogaster]	2	2	2	0.0372974	0.718161
BGIBMGA013801	novel protein	1	1	3	0.0372642	0.529747
BGIBMGA004661	novel protein	1	1	2	0.0370358	0.494772
BGIBMGA002310	novel protein	2	2	2	0.036728	0.487473
gi_24668413	CG7145_ isoform A [D.melanogaster]	1	1	1	0.0365374	0.482943
gi_24641278	discs large 1_ isoform F [D.melanogaster]	1	1	2	0.0365338	0.488863
gi_112982751	60S ribosomal protein L38 [B.mori]	2	2	6	0.0363685	0.631109
BGIBMGA012827	novel protein	1	1	7	0.036324	0.703343
BGIBMGA005041	novel protein	1	1	1	0.036284	0.429614
BGIBMGA008983	novel protein	1	1	1	0.0361031	0.42672
BGIBMGA010178	novel protein	1	1	2	0.0360363	0.499412
BGIBMGA013971	novel protein	2	2	3	0.0358651	0.538732
gi_17864452	ribosomal protein L12_ isoform A [D.melanogaster]	1	1	2	0.03536	0.651396
BGIBMGA005392	novel protein	2	2	11	0.0353552	0.671766
BGIBMGA006907	novel protein	5	5	7	0.0353149	0.762698
BGIBMGA013260	novel protein	2	2	7	0.0346422	0.605123
BGIBMGA001915	novel protein	2	2	4	0.0344383	0.58619
BGIBMGA008881	novel protein	3	4	17	0.0343773	0.691952
BGIBMGA010520	novel protein	1	1	2	0.0342582	0.497132
BGIBMGA009993	novel protein	1	1	1	0.0340851	0.427532
gi_18859963	Arginyl_tRNA synthetase [D.melanogaster]	1	1	1	0.0340608	0.426598
gi_21357223	Tyrosyl_tRNA synthetase [D.melanogaster]	1	1	2	0.0338746	0.571002
BGIBMGA008707	novel protein	1	1	6	0.0334894	0.593131
gi_17136322	ribosomal protein L19_ isoform A [D.melanogaster]	1	2	9	0.0334219	0.785594
BGIBMGA012859	novel protein	1	1	2	0.0331317	0.489066
BGIBMGA001043	novel protein	4	4	24	0.0330082	0.830528
gi_114052186	prefoldin subunit 3 [B.mori]	1	1	4	0.0327612	0.558543
gi_17136324	ribosomal protein S3 [D.melanogaster]	3	3	4	0.0325475	0.854992
BGIBMGA003709	novel protein	1	1	1	0.0323098	0.424535
BGIBMGA001307	novel protein	5	6	13	0.0321864	0.706669
BGIBMGA012116	novel protein	1	1	1	0.0321615	0.426517
gi_45550132	Hsp60C_ isoform C [D.melanogaster]	1	1	1	0.0319848	0.623924
BGIBMGA007224	novel protein	1	1	8	0.0314526	0.621724
gi_45555767	CG9132_ isoform B [D.melanogaster]	1	1	4	0.0312416	0.556473
BGIBMGA013235	novel protein	2	2	3	0.031208	0.530371
gi_112983280	Hsc70/Hsp90_organizing protein HOP [B.mori]	2	2	11	0.0305644	0.775945
BGIBMGA013234	novel protein	1	1	2	0.0301761	0.490104
BGIBMGA009941	novel protein	3	3	9	0.0300582	0.656801
BGIBMGA004940	novel protein	1	1	5	0.0299468	0.561288
BGIBMGA004910	novel protein	1	1	2	0.0299269	0.486116
BGIBMGA007869	novel protein	1	1	1	0.0296088	0.428537
BGIBMGA002604	novel protein	2	2	5	0.0295847	0.577411
gi_24655082	CG10924_ isoform A [D.melanogaster]	1	1	4	0.0290287	0.658135
gi_112984248	ribosomal protein L24 [B.mori]	4	5	11	0.028925	0.813946
BGIBMGA010974	novel protein	1	1	1	0.0288975	0.427088
BGIBMGA011280	novel protein	1	2	8	0.0288665	0.631863
BGIBMGA014560	novel protein	1	1	1	0.0288665	0.631863
BGIBMGA012571	novel protein	1	1	2	0.028665	0.486151
BGIBMGA005648	novel protein	2	2	4	0.0286502	0.586304
gi_24641047	Rab GTPase 9D [D.melanogaster]	1	2	4	0.0285401	0.557234
gi_24641058	Rab GTPase 9Db [D.melanogaster]	1	2	4	0.0285401	0.557234
BGIBMGA004343	novel protein	1	1	3	0.0282156	0.51901
BGIBMGA013098	novel protein	2	2	4	0.0279434	0.582648
gi_161085488	Rab26_ isoform C [D.melanogaster]	1	1	2	0.0279035	0.835339
gi_17647849	Rab_protein 4_ isoform B [D.melanogaster]	1	2	4	0.0279035	0.835339
BGIBMGA004666	novel protein	1	1	1	0.0279035	0.835339
gi_24649793	RabX4 [D.melanogaster]	1	2	6	0.0279035	0.835339
gi_28574668	Rtnl1_ isoform A [D.melanogaster]	1	2	7	0.0278462	0.619931
BGIBMGA011344	novel protein	1	1	5	0.0273941	0.57039
BGIBMGA003004	novel protein	1	1	3	0.0273934	0.531228
BGIBMGA006171	novel protein	1	1	1	0.0271233	0.424044
gi_164448660	cytochrome c oxidase polypeptide Vb [B.mori]	1	1	2	0.0269979	0.482778
BGIBMGA010790	novel protein	1	1	1	0.0266388	0.423926
gi_24583248	ribosomal protein L7 [D.melanogaster]	1	2	3	0.0266351	0.737562
BGIBMGA005443	novel protein	1	1	4	0.0265679	0.539095
gi_24645861	translationally controlled tumor protein [D.melanogaster]	1	1	2	0.0260396	0.559594
gi_17737457	Rab_protein 3 [D.melanogaster]	1	2	3	0.0257619	0.524568
BGIBMGA006932	novel protein	1	1	1	0.0255195	0.422345
BGIBMGA007131	novel protein	1	1	1	0.0254169	0.424695
BGIBMGA001358	novel protein	1	1	6	0.0252863	0.594714
BGIBMGA000328	novel protein	1	1	2	0.0245144	0.482764
gi_24661707	ribosomal protein S9_ isoform A [D.melanogaster]	3	4	13	0.0242266	0.876222
gi_28575006	CG2277 [D.melanogaster]	1	1	1	0.0240537	0.424041
BGIBMGA003048	novel protein	1	1	6	0.023977	0.591218
BGIBMGA002565	novel protein	2	2	8	0.023728	0.622083
BGIBMGA008903	novel protein	1	1	5	0.0236872	0.562361
BGIBMGA014271	novel protein	1	1	1	0.0235848	0.419481
BGIBMGA006709	novel protein	1	1	1	0.0231119	0.425359
gi_17647193	beta_coatomer protein [D.melanogaster]	1	1	1	0.0223625	0.425194
gi_21357685	CG7139_ isoform A [D.melanogaster]	1	1	2	0.0221284	0.485282
BGIBMGA011788	novel protein	2	2	3	0.0220335	0.530126
BGIBMGA000382	novel protein	1	1	1	0.0219978	0.423865
BGIBMGA003544	novel protein	1	1	1	0.0219012	0.423577
gi_24656379	CG13436 [D.melanogaster]	1	1	1	0.0216825	0.421382
BGIBMGA004331	novel protein	1	1	3	0.0212813	0.520412
BGIBMGA000714	novel protein	1	1	1	0.0211289	0.425131
BGIBMGA011446	novel protein	1	2	14	0.0204868	0.678809
gi_24584723	Ugt36Bc_ isoform A [D.melanogaster]	1	1	1	0.0204825	0.42105
BGIBMGA004102	novel protein	1	1	1	0.0203968	0.422623
gi_24640672	moesin_ isoform B [D.melanogaster]	1	1	2	0.0203238	0.492329
BGIBMGA008699	novel protein	1	1	2	0.0201043	0.492644
BGIBMGA004187	novel protein	1	1	1	0.0200759	0.42285
BGIBMGA011521	novel protein	1	1	2	0.0199528	0.486266
BGIBMGA010004	novel protein	1	1	1	0.0193882	0.419993
gi_114050773	short_chain dehydrogenease/reductase_like [B.mori]	1	1	2	0.0193612	0.485621
gi_17647891	ribosomal protein S19a_ isoform A [D.melanogaster]	1	2	5	0.0193521	0.688777
BGIBMGA014207	novel protein	1	1	2	0.0183278	0.484419
BGIBMGA000619	novel protein	1	1	3	0.0174078	0.518299
gi_114326261	PTB_associated splicing factor [B.mori]	1	1	1	0.0151658	0.423543
BGIBMGA003421	novel protein	1	1	1	0.0151656	0.416564
BGIBMGA004837	novel protein	1	1	1	0.0140076	0.421922
BGIBMGA010921	novel protein	1	1	1	0.0124952	0.420993
BGIBMGA010361	novel protein	1	1	1	0.0116045	0.423676
BGIBMGA010143	novel protein	1	1	2	0.0114875	0.476265
BGIBMGA007401	novel protein	1	1	2	0.00894433	0.486732
BGIBMGA001664	novel protein	1	1	1	0.0084559	0.422022
gi_112982916	RNA binding motif protein Y14 [B.mori]	1	1	1	0.00811245	0.421181
BGIBMGA000803	novel protein	1	1	1	0.00378298	0.423261
Note:All the BGIBMGAxxxxxx_PA were written as BGIBMGAxxxxxx.

## Sheet: Sup Table 4
Supplemental Table 4 The common proteins between the SDS-PAGE based and gel-free based proteomic techniques
Protein ID	Description	Matched peptides	Frames	Hits	Fold ZB/Lan10	P-Value ZB/Lan10
gi_1377915	enhanced green fluorescent protein [Cloning vector pEGFP_C1]	6	8	36	4768.67	3.12742e-12
gi_120444903	chaperonin [B.mori]	16	21	75	37.3548	0.0121834
gi_114052160	proteasome subunit alpha type 6_A [B.mori]	9	10	46	7.49648	2.73058e-05
BGIBMGA004657	proteasome subunit alpha type 6-A [B.mori]	5	6	13	7.11648	0.0047753
BGIBMGA002689	seroin 1 precursor [B.mori]	2	10	36	6.25681	0.00802142
gi_28572004	triose phosphate isomerase_ isoform A [D.melanogaster]	3	3	21	5.38349	0.000361003
gi_187281708	triosephosphate isomerase [B.mori]	9	12	54	4.48244	0.0158055
gi_17530805	actin 5C_ isoform B [D.melanogaster]	12	60	225	4.11182	0.0294025
BGIBMGA013945	actin [A.aegypti]	9	54	201	3.53119	0.015549
BGIBMGA009830	eukaryotic translation initiation factor 6 [B.mori]	4	8	33	3.49063	0.00856946
BGIBMGA002222	glutathione S-transferase delta 2 [B.mori]	8	10	37	3.19438	0.00846666
gi_187281831	actin_ muscle_type A2 [B.mori]	10	44	135	3.15343	0.00753592
BGIBMGA006158	prohibitin protein WPH [B.mori]	9	11	51	2.61246	0.023929
BGIBMGA003608	elongation factor-1 alpha [B.mori]	19	324	2202	2.40079	6.22881e-08
BGIBMGA014201	Aldehyde dehydrogenase[B.mori]	23	47	286	1.86775	0.00399445
BGIBMGA009821	PREDICTED: actin, cytoplasmic 1-like isoform 4 [M.mulatta]	5	6	12	1.75715	0.0329002
BGIBMGA012753	Heat shock protein Hsp90[B.mori]	16	36	131	0.746684	0.0273649
Note: All the BGIBMGAxxxxxx_PA were written as BGIBMGAxxxxxx.

## Sheet: Sup Table 5
Supplemental Table 5 Pathway involved in differentially altered proteins from the posterior silk gland at 3rd day of 5th instar
Pathway	ko ID	Proteins	Number of proteins
Increased
Metabolic pathways (no map in kegg database)	ko01100	BGIBMGA000062-PA, BGIBMGA000596-PA, BGIBMGA001853-PA, BGIBMGA001876-PA, BGIBMGA002376-PA, BGIBMGA002461-PA, BGIBMGA002508-PA, BGIBMGA002570-PA, BGIBMGA002644-PA, BGIBMGA003815-PA, BGIBMGA004221-PA, BGIBMGA004965-PA, BGIBMGA005493-PA, BGIBMGA007267-PA, BGIBMGA008295-PA, BGIBMGA008670-PA, BGIBMGA009974-PA, BGIBMGA010588-PA, BGIBMGA011504-PA, BGIBMGA011870-PA, BGIBMGA012549-PA, BGIBMGA012960-PA, BGI…	37
Phagosome	ko04145	BGIBMGA000596-PA, BGIBMGA002542-PA, BGIBMGA008295-PA, BGIBMGA009131-PA, BGIBMGA009821-PA, BGIBMGA013945-PA, gi|112983456|ref|NP_001036888.1|, gi|148298878|ref|NP_001091829.1|, gi|17530805|ref|NP_511052.1|, gi|17647135|ref|NP_523800.1|, gi|17865841|ref|NP_524297.1|, gi|187281831|ref|NP_001119725.1|, gi|24583984|ref|NP_652004.2|, gi|24645350|ref|NP_524290.2|, gi|24655737|ref|NP_523795.2|	15
Huntington's disease	ko05016	BGIBMGA001853-PA, BGIBMGA002005-PA, BGIBMGA005466-PA, BGIBMGA007267-PA, BGIBMGA008670-PA, BGIBMGA009012-PA, BGIBMGA010588-PA, BGIBMGA011870-PA, BGIBMGA012549-PA, BGIBMGA013965-PA, gi|158631166|ref|NP_001037072.1|, gi|18079273|ref|NP_511109.1|, gi|24638766|ref|NP_726631.1|, gi|290562453|ref|NP_001166827.1|	14
Parkinson's disease	ko05012	BGIBMGA001853-PA, BGIBMGA002005-PA, BGIBMGA007267-PA, BGIBMGA008670-PA, BGIBMGA009012-PA, BGIBMGA010588-PA, BGIBMGA011870-PA, BGIBMGA012549-PA, BGIBMGA012632-PA, BGIBMGA013965-PA, gi|158631166|ref|NP_001037072.1|, gi|18079273|ref|NP_511109.1|, gi|24638766|ref|NP_726631.1|, gi|290562453|ref|NP_001166827.1|	14
Pathogenic Escherichia coli infection	ko05130	BGIBMGA002542-PA, BGIBMGA002644-PA, BGIBMGA009131-PA, BGIBMGA009821-PA, BGIBMGA013201-PA, BGIBMGA013945-PA, gi|112983456|ref|NP_001036888.1|, gi|17530805|ref|NP_511052.1|, gi|17647135|ref|NP_523800.1|, gi|17865841|ref|NP_524297.1|, gi|187281831|ref|NP_001119725.1|, gi|24645350|ref|NP_524290.2|, gi|24655737|ref|NP_523795.2|	13
Oxidative phosphorylation	ko00190	BGIBMGA000596-PA, BGIBMGA001853-PA, BGIBMGA007267-PA, BGIBMGA008295-PA, BGIBMGA008670-PA, BGIBMGA010588-PA, BGIBMGA011870-PA, BGIBMGA012549-PA, BGIBMGA013965-PA, gi|148298878|ref|NP_001091829.1|, gi|24583984|ref|NP_652004.2|, gi|24638766|ref|NP_726631.1|, gi|290562453|ref|NP_001166827.1|	13
Alzheimer's disease	ko05010	BGIBMGA001853-PA, BGIBMGA003066-PA, BGIBMGA007267-PA, BGIBMGA008670-PA, BGIBMGA009012-PA, BGIBMGA009182-PA, BGIBMGA010588-PA, BGIBMGA011870-PA, BGIBMGA012549-PA, BGIBMGA013965-PA, gi|24638766|ref|NP_726631.1|, gi|290562453|ref|NP_001166827.1|	12
Protein processing in endoplasmic reticulum	ko04141	BGIBMGA002381-PA, BGIBMGA002570-PA, BGIBMGA004847-PA, BGIBMGA007950-PA, BGIBMGA008551-PA, BGIBMGA012753-PA, BGIBMGA013343-PA, BGIBMGA013498-PA, gi|114052941|ref|NP_001040332.1|, gi|24641402|ref|NP_727563.1|	10
Influenza A	ko05164	BGIBMGA002005-PA, BGIBMGA002381-PA, BGIBMGA009012-PA, BGIBMGA009821-PA, BGIBMGA013945-PA, gi|158631166|ref|NP_001037072.1|, gi|17530805|ref|NP_511052.1|, gi|17647135|ref|NP_523800.1|, gi|18079273|ref|NP_511109.1|, gi|187281831|ref|NP_001119725.1|	10
Vibrio cholerae infection	ko05110	BGIBMGA000596-PA, BGIBMGA008295-PA, BGIBMGA009821-PA, BGIBMGA013945-PA, gi|148298878|ref|NP_001091829.1|, gi|17530805|ref|NP_511052.1|, gi|17647135|ref|NP_523800.1|, gi|187281831|ref|NP_001119725.1|, gi|24583984|ref|NP_652004.2|,	9
Tight junction	ko04530	BGIBMGA002340-PA, BGIBMGA003474-PA, BGIBMGA007948-PA, BGIBMGA009704-PA, BGIBMGA009821-PA, BGIBMGA013945-PA, gi|17530805|ref|NP_511052.1|, gi|17647135|ref|NP_523800.1|, gi|187281831|ref|NP_001119725.1|	9
Epstein-Barr virus infection	ko05169	BGIBMGA002381-PA, BGIBMGA002644-PA,BGIBMGA004782-PA, BGIBMGA005315-PA, BGIBMGA011237-PA, BGIBMGA013201-PA, gi|114053311|ref|NP_001040338.1|, gi|304307739|ref|NP_001182009.1|	8
Ribosome	ko03010	BGIBMGA000867-PA, BGIBMGA003309-PA, BGIBMGA007661-PA, BGIBMGA001483_PA,gi|112984078|ref|NP_001037257.1|, gi|17136324|ref|NP_476632.1|, gi|17737290|ref|NP_511073.1|	7
Proteasome	ko03050	BGIBMGA001395-PA, BGIBMGA004376-PA, BGIBMGA004782-PA, BGIBMGA005315-PA, BGIBMGA011237-PA, gi|114052160|ref|NP_001040459.1|, gi|114053311|ref|NP_001040338.1|	7
Glycolysis / Gluconeogenesis	ko00010	BGIBMGA002508-PA, BGIBMGA002644-PA, BGIBMGA004221-PA, BGIBMGA005493-PA, gi|148298800|ref|NP_001091831.1|, gi|187281708|ref|NP_001119730.1|, gi|28572004|ref|NP_788764.1|	7
Gap junction	ko04540	BGIBMGA002542-PA, BGIBMGA009131-PA, gi|112983456|ref|NP_001036888.1|, gi|17865841|ref|NP_524297.1|, gi|24645350|ref|NP_524290.2|, gi|24655737|ref|NP_523795.2|	6
Viral myocarditis	ko05416	BGIBMGA009012-PA, BGIBMGA009821-PA, BGIBMGA013945-PA, gi|17530805|ref|NP_511052.1|, gi|17647135|ref|NP_523800.1|, gi|187281831|ref|NP_001119725.1|	6
Synaptic vesicle cycle	ko04721	BGIBMGA000596-PA,BGIBMGA005466-PA, BGIBMGA008295-PA, gi|148298878|ref|NP_001091829.1|, gi|24583984|ref|NP_652004.2|	5
Focal adhesion	ko04510	BGIBMGA009821-PA, BGIBMGA013945-PA, gi|17530805|ref|NP_511052.1|, gi|17647135|ref|NP_523800.1|, gi|187281831|ref|NP_001119725.1|	5
Salmonella infection	ko05132	BGIBMGA009821-PA, BGIBMGA013945-PA, gi|17530805|ref|NP_511052.1|, gi|17647135|ref|NP_523800.1|, gi|187281831|ref|NP_001119725.1|	5
Adherens junction	ko04520	BGIBMGA009821-PA, BGIBMGA013945-PA, gi|17530805|ref|NP_511052.1|, gi|17647135|ref|NP_523800.1|, gi|187281831|ref|NP_001119725.1|	5
Bacterial invasion of epithelial cells	ko05100	BGIBMGA009821-PA, BGIBMGA013945-PA, gi|17530805|ref|NP_511052.1|, gi|17647135|ref|NP_523800.1|, gi|187281831|ref|NP_001119725.1|	5
Regulation of actin cytoskeleton	ko04810	BGIBMGA009821-PA, BGIBMGA013945-PA, gi|17530805|ref|NP_511052.1|, gi|17647135|ref|NP_523800.1|, gi|187281831|ref|NP_001119725.1|	5
Leukocyte transendothelial migration	ko04670	BGIBMGA009821-PA, BGIBMGA013945-PA, gi|17530805|ref|NP_511052.1|, gi|17647135|ref|NP_523800.1|, gi|187281831|ref|NP_001119725.1|	5
Gastric acid secretion	ko04971	BGIBMGA009821-PA, BGIBMGA013945-PA, gi|17530805|ref|NP_511052.1|, gi|17647135|ref|NP_523800.1|, gi|187281831|ref|NP_001119725.1|	5
Pentose phosphate pathway	ko00030	BGIBMGA002461-PA, BGIBMGA002644-PA, BGIBMGA004221-PA, BGIBMGA013916-PA, gi|114050833|ref|NP_001040158.1|	5
Shigellosis	ko05131	BGIBMGA009821-PA, BGIBMGA013945-PA, gi|17530805|ref|NP_511052.1|, gi|17647135|ref|NP_523800.1|, gi|187281831|ref|NP_001119725.1|	5
Epithelial cell signaling in Helicobacter pylori infection	ko05120	BGIBMGA000596-PA, BGIBMGA008295-PA, BGIBMGA008879-PA, gi|148298878|ref|NP_001091829.1|, gi|24583984|ref|NP_652004.2|,	5
Arrhythmogenic right ventricular cardiomyopathy	ko05412	BGIBMGA009821-PA, BGIBMGA013945-PA, gi|17530805|ref|NP_511052.1|, gi|17647135|ref|NP_523800.1|, gi|187281831|ref|NP_001119725.1|	5
Dilated cardiomyopathy	ko05414	BGIBMGA009821-PA, BGIBMGA013945-PA, gi|17530805|ref|NP_511052.1|, gi|17647135|ref|NP_523800.1|, gi|187281831|ref|NP_001119725.1|	5
Phototransduction - fly	ko04745	BGIBMGA009821-PA, BGIBMGA013945-PA, gi|17530805|ref|NP_511052.1|, gi|17647135|ref|NP_523800.1|, gi|187281831|ref|NP_001119725.1|	5
Hypertrophic cardiomyopathy	ko05410	BGIBMGA009821-PA, BGIBMGA013945-PA, gi|17530805|ref|NP_511052.1|, gi|17647135|ref|NP_523800.1|, gi|187281831|ref|NP_001119725.1|	5
Endocytosis	ko04144	BGIBMGA002209-PA, BGIBMGA002381-PA, BGIBMGA004647-PA, BGIBMGA005466-PA, BGIBMGA010381-PA	5
Legionellosis	ko05134	BGIBMGA002381-PA, BGIBMGA003608-PA, BGIBMGA007349-PA, BGIBMGA008302-PA, BGIBMGA009012-PA	5
Rheumatoid arthritis	ko05323	BGIBMGA000596-PA, BGIBMGA008295-PA, gi|148298878|ref|NP_001091829.1|, gi|24583984|ref|NP_652004.2|	4
RNA degradation	ko03018	BGIBMGA005493-PA,BGIBMGA007349-PA, gi|114051355|ref|NP_001040373.1|, gi|148298800|ref|NP_001091831.1|	4
Protein export	ko03060	BGIBMGA007950-PA, gi|148298679|ref|NP_001091817.1|, gi|148298802|ref|NP_001091807.1|, gi|24641402|ref|NP_727563.1|	4
HTLV-I infection	ko05166	BGIBMGA002005-PA, BGIBMGA009704-PA, gi|158631166|ref|NP_001037072.1|, gi|18079273|ref|NP_511109.1|	4
Pathways in cancer	ko05200	BGIBMGA002222-PA, BGIBMGA009012-PA, BGIBMGA009704-PA, BGIBMGA012753-PA	4
Inositol phosphate metabolism	ko00562	BGIBMGA012960-PA, gi|17738047|ref|NP_524404.1|, gi|187281708|ref|NP_001119730.1|, gi|28572004|ref|NP_788764.1|	4
RNA transport	ko03013	BGIBMGA003608-PA, BGIBMGA004847-PA, BGIBMGA006462-PA, BGIBMGA008209-PA	4
Prion diseases	ko05020	BGIBMGA002381-PA, BGIBMGA007950-PA, BGIBMGA010000-PA, gi|24641402|ref|NP_727563.1|	4
Citrate cycle	ko00020	BGIBMGA003815-PA, BGIBMGA009974-PA, gi|114051866|ref|NP_001040134.1|	3
mRNA surveillance pathway	ko03015	BGIBMGA001806-PA, BGIBMGA002340-PA, BGIBMGA010831-PA	3
Tuberculosis	ko05152	BGIBMGA000596-PA, BGIBMGA007349-PA, BGIBMGA009012-PA	3
Oocyte meiosis	ko04114	BGIBMGA002340-PA, BGIBMGA002644-PA, BGIBMGA013201-PA	3
Purine metabolism	ko00230	BGIBMGA002508-PA, BGIBMGA009704-PA, BGIBMGA013510-PA,	3
Ribosome biogenesis in eukaryotes	ko03008	BGIBMGA006056-PA, BGIBMGA009207-PA, BGIBMGA009830-PA	3
Spliceosome	ko03040	BGIBMGA002381-PA, BGIBMGA011746-PA, BGIBMGA011965-PA	3
p53 signaling pathway	ko04115	BGIBMGA009012-PA, BGIBMGA009704-PA, BGIBMGA013510-PA	3
Collecting duct acid secretion	ko04966	BGIBMGA008295-PA, gi|148298878|ref|NP_001091829.1|, gi|24583984|ref|NP_652004.2|	3
Starch and sucrose metabolism	ko00500	BGIBMGA001876-PA, BGIBMGA004221-PA, BGIBMGA004965-PA	3
Cell cycle	ko04110	BGIBMGA002644-PA, BGIBMGA009704-PA, BGIBMGA013201-PA	3
Calcium signaling pathway	ko04020	BGIBMGA002005-PA, gi|158631166|ref|NP_001037072.1|, gi|18079273|ref|NP_511109.1|	3
Glutathione metabolism	ko00480	BGIBMGA002222-PA, BGIBMGA013510-PA, gi|114051866|ref|NP_001040134.1|	3
Fructose and mannose metabolism	ko00051	BGIBMGA002644-PA, gi|187281708|ref|NP_001119730.1|, gi|28572004|ref|NP_788764.1|	3
Antigen processing and presentation	ko04612	BGIBMGA002381-PA, BGIBMGA007950-PA, gi|24641402|ref|NP_727563.1|	3
Glycine, serine and threonine metabolism	ko00260	gi|114051239|ref|NP_001040113.1|, gi|114052677|ref|NP_001040269.1|	2
Lysosome	ko04142	BGIBMGA000596-PA,BGIBMGA014221-PA	2
Aminoacyl-tRNA biosynthesis	ko00970	BGIBMGA003977-PA, gi|112984224|ref|NP_001037452.1|	2
Porphyrin and chlorophyll metabolism	ko00860	BGIBMGA004965-PA,BGIBMGA008768-PA	2
Systemic lupus erythematosus	ko05322	BGIBMGA014499-PA, BGIBMGA014579-PA	2
Transcriptional misregulation in cancer	ko05202	BGIBMGA011746-PA, BGIBMGA011965-PA	2
Metabolism of xenobiotics by cytochrome P450	ko00980	BGIBMGA002222-PA, BGIBMGA004965-PA	2
Pentose and glucuronate interconversions	ko00040	BGIBMGA002461-PA, BGIBMGA004965-PA	2
Drug metabolism - cytochrome P450	ko00982	BGIBMGA002222-PA, BGIBMGA004965-PA	2
Insulin signaling pathway	ko04910	BGIBMGA012960-PA, gi|17737290|ref|NP_511073.1|	2
Lysine degradation	ko00310	BGIBMGA003815-PA, BGIBMGA009974-PA	2
Alcoholism	ko05034	BGIBMGA014499-PA, BGIBMGA014579-PA	2
Measles	ko05162	BGIBMGA002381-PA, BGIBMGA009704-PA	2
Herpes simplex infection	ko05168	BGIBMGA003475-PA, BGIBMGA009012-PA	2
Peroxisome	ko04146	BGIBMGA014129-PA, gi|114051866|ref|NP_001040134.1|	2
Amino sugar and nucleotide sugar metabolism	ko00520	BGIBMGA004221-PA, BGIBMGA010847-PA	2
N-Glycan biosynthesis	ko00510	BGIBMGA002570-PA, BGIBMGA013498-PA	2
Endocrine and other factor-regulated calcium reabsorption	ko04961	BGIBMGA002209-PA, BGIBMGA005466-PA	2
Toxoplasmosis	ko05145	BGIBMGA002381-PA, BGIBMGA009012-PA	2
Tryptophan metabolism	ko00380	BGIBMGA002967-PA, BGIBMGA009974-PA	2
Prostate cancer	ko05215	BGIBMGA002222-PA, BGIBMGA012753-PA	2
Neurotrophin signaling pathway	ko04722	BGIBMGA002644-PA, BGIBMGA013201-PA	2
Small cell lung cancer	ko05222	BGIBMGA009012-PA, BGIBMGA009704-PA	2
Pancreatic secretion	ko04972	BGIBMGA001876-PA, BGIBMGA002209-PA	2
Hepatitis C	ko05160	BGIBMGA002340-PA	1
Chagas disease	ko05142	BGIBMGA002340-PA	1
Cysteine and methionine metabolism	ko00270	gi|153791817|ref|NP_001093271.1|	1
Pyruvate metabolism	ko00620	BGIBMGA002508-PA	1
Wnt signaling pathway	ko04310	BGIBMGA002340-PA	1
TGF-beta signaling pathway	ko04350	BGIBMGA002340-PA	1
Vitamin B6 metabolism	ko00750	gi|114052677|ref|NP_001040269.1|	1
Dopaminergic synapse	ko04728	BGIBMGA002340-PA	1
Long-term depression	ko04730	BGIBMGA002340-PA	1
Valine, leucine and isoleucine degradation	ko00280	BGIBMGA002376-PA	1
Ascorbate and aldarate metabolism	ko00053	BGIBMGA004965-PA	1
One carbon pool by folate	ko00670	BGIBMGA014201-PA	1
Drug metabolism - other enzymes	ko00983	BGIBMGA004965-PA	1
Bile secretion	ko04976	BGIBMGA004965-PA	1
Propanoate metabolism	ko00640	BGIBMGA002376-PA	1
Phosphatidylinositol signaling system	ko04070	BGIBMGA012960-PA	1
beta-Alanine metabolism	ko00410	BGIBMGA002376-PA	1
Retinol metabolism	ko00830	BGIBMGA004965-PA	1
mTOR signaling pathway	ko04150	gi|17737290|ref|NP_511073.1|	1
Steroid hormone biosynthesis	ko00140	BGIBMGA004965-PA	1
Vasopressin-regulated water reabsorption	ko04962	BGIBMGA002209-PA	1
Other types of O-glycan biosynthesis	ko00514	BGIBMGA004965-PA	1
SNARE interactions in vesicular transport	ko04130	BGIBMGA010620-PA	1
Melanoma	ko05218	BGIBMGA009704-PA	1
PPAR signaling pathway	ko03320	BGIBMGA002906-PA	1
Mineral absorption	ko04978	BGIBMGA008768-PA	1
Non-small cell lung cancer	ko05223	BGIBMGA009704-PA	1
Axon guidance	ko04360	BGIBMGA002265-PA	1
NOD-like receptor signaling pathway	ko04621	BGIBMGA012753-PA	1
Galactose metabolism	ko00052	BGIBMGA002644-PA	1
Glycerophospholipid metabolism	ko00564	BGIBMGA002353-PA	1
Tyrosine metabolism	ko00350	BGIBMGA000062-PA	1
Salivary secretion	ko04970	BGIBMGA001876-PA	1
MAPK signaling pathway	ko04010	BGIBMGA002381-PA	1
Colorectal cancer	ko05210	BGIBMGA009012-PA	1
Carbohydrate digestion and absorption	ko04973	BGIBMGA001876-PA	1
Bladder cancer	ko05219	BGIBMGA009704-PA	1
Type II diabetes mellitus	ko04930	BGIBMGA002508-PA	1
T cell receptor signaling pathway	ko04660	BGIBMGA009704-PA	1
Type I diabetes mellitus	ko04940	BGIBMGA007349-PA	1
Apoptosis	ko04210	BGIBMGA009012-PA	1
Pyrimidine metabolism	ko00240	BGIBMGA013510-PA	1
Amyotrophic lateral sclerosis	ko05014	BGIBMGA009012-PA	1
ECM-receptor interaction	ko04512	BGIBMGA012240-PA	1
Glioma	ko05220	BGIBMGA009704-PA	1
Chronic myeloid leukemia	ko05220	BGIBMGA009704-PA	1
Pancreatic cancer	ko05212	BGIBMGA009704-PA	1
Decreased
Ribosome	ko03010	BGIBMGA000959_PA,BGIBMGA000066_PA, gi|24650747|ref|NP_524538.2|	3
Protein processing in endoplasmic reticulum	ko04141	gi|17137560|ref|NP_477369.1|	1
Metabolic pathways	ko01100	gi|114052561|ref|NP_001040257.1|	1
Calcium signaling pathway	ko04020	BGIBMGA006603-PA gi|17136664|ref|NP_476832.1|	1
Alzheimer's disease	ko05010	BGIBMGA006603-PA gi|17136664|ref|NP_476832.1|	1
Arrhythmogenic right ventricular cardiomyopathy	ko05412	BGIBMGA006603-PA gi|17136664|ref|NP_476832.1|	1
Dilated cardiomyopathy	ko05414	BGIBMGA006603-PA gi|17136664|ref|NP_476832.1|	1
Cardiac muscle contraction	ko04260	BGIBMGA006603-PA gi|17136664|ref|NP_476832.1|	1
Hypertrophic cardiomyopathy	ko05410	BGIBMGA006603-PA gi|17136664|ref|NP_476832.1|	1
Pancreatic secretion	ko04972	BGIBMGA006603-PA gi|17136664|ref|NP_476832.1|	1
Citrate cycle	ko00020	gi|114052561|ref|NP_001040257.1|	1
Insect hormone biosynthesis	ko00981	BGIBMGA010392-PA	1
Glyoxylate and dicarboxylate metabolism	ko00630	gi|114052561|ref|NP_001040257.1|	1
Legionellosis	ko05134	gi|17137560|ref|NP_477369.1|	1
Proximal tubule bicarbonate reclamation	ko04964	gi|114052561|ref|NP_001040257.1|	1
One carbon pool by folate	ko00670	gi|24585660|ref|NP_610107.1|	1
Note: (1)ko means KEGG Orthology.

## Sheet: Sup Table 6
Supplemental Table 6 Summary of trancriptome sequencing related information
	Lan10		ZB
Data(M)	4172.09		4772.82
GC(%)	52.77		49.37
Cycle Q20(%)	99.48		99.5
Total Reads	18477378	1	20393591	1
Mapped Reads	10379873	0.5617	12317823	0.604
Perfect Mapped Reads	5028800	0.4844	6875343	0.5581
MisMatch
0	9110416	0.8777	10911934	0.8858
1	839874	0.0809	953764	0.0774
2	215883	0.0207	234883	0.019
3	183123	0.0176	188259	0.0152
4	23223	0.0022	22076	0.0017
5	4498	0.0004	4651	0.0003
6	2856	0.0002	2256	0.0001

## Sheet: Sup Table 7
Supplemental Table 7 Differential expression of transcripts from the posterior silk gland at 3rd day of 5th instar
Gene ID	ZB (RPKM)	Lan10 (RPKM)	Chi	Q-value	Fold ZB/Lan10(log2)	Swissprot_annotation	TrEMBL_annotation	ipr_annotation	nr_annotation	nt_annotation
BGIBMGA004728-TA	135	0	0	0	17.0426	Zonadhesin OS=Mus musculus GN=Zan PE=2 SV=1	Serine protease inhibitor 28 GN=KGM_16810 OS=Danaus plexippus (Monarch butterfly) PE=3 SV=1	IPR000215: Protease inhibitor I4, serpin; IPR002919: Protease inhibitor I8, cysteine-rich trypsin inhibitor-like; IPR023796: Serpin domain	protease inhibitor 3 [Lonomia obliqua]	Bombyx mori serine protease inhibitor 28 (serpin-28), mRNA >gi|195972057|gb|EU935629.1| Bombyx mori serpin-28 mRNA, complete cds
gnl|UG|Bmo#S50900140	120	0	0	0	16.8727	Antichymotrypsin-2 OS=Bombyx mori PE=1 SV=1	Serpin-28 OS=Bombyx mori (Silk moth) PE=2 SV=1	IPR000215: Protease inhibitor I4, serpin; IPR023796: Serpin domain	serine protease inhibitor 28 [Bombyx mori] >gi|195972058|gb|ACG61191.1| serpin-28 [Bombyx mori]	Bombyx mori serine protease inhibitor 28 (serpin-28), mRNA >gi|195972057|gb|EU935629.1| Bombyx mori serpin-28 mRNA, complete cds
BGIBMGA009978-TA	117	0	0	0	16.8361	Nucleolar and coiled-body phosphoprotein 1 OS=Rattus norvegicus GN=Nolc1 PE=1 SV=1	Putative uncharacterized protein GN=KGM_20123 OS=Danaus plexippus (Monarch butterfly) PE=4 SV=1	IPR006594: LisH dimerisation motif	GI13559 [Drosophila mojavensis] >gi|193920167|gb|EDW19034.1| GI13559 [Drosophila mojavensis]	--
AK386546|fprW13P05	109	0	0	0	16.734	Nucleolar and coiled-body phosphoprotein 1 OS=Rattus norvegicus GN=Nolc1 PE=1 SV=1	Nopp140, isoform B GN=Nopp140 OS=Drosophila melanogaster (Fruit fly) PE=2 SV=1	IPR006594: LisH dimerisation motif; IPR007718: SRP40, C-terminal	Nopp140, isoform D [Drosophila melanogaster] >gi|318069272|gb|ADV37594.1| Nopp140, isoform D [Drosophila melanogaster]	TSA: Rhagoletis pomonella contig01308, mRNA sequence
gnl|UG|Bmo#S58872558	109	0	0	0	16.734	Nucleolar and coiled-body phosphoprotein 1 OS=Rattus norvegicus GN=Nolc1 PE=1 SV=1	Nopp140, isoform B GN=Nopp140 OS=Drosophila melanogaster (Fruit fly) PE=2 SV=1	IPR006594: LisH dimerisation motif; IPR007718: SRP40, C-terminal	Nopp140, isoform D [Drosophila melanogaster] >gi|318069272|gb|ADV37594.1| Nopp140, isoform D [Drosophila melanogaster]	TSA: Rhagoletis pomonella contig01308, mRNA sequence
AK384868|fcaL41L04_K01755	194	1	0	0	7.59991	NHP2-like protein 1 OS=Rattus norvegicus GN=Nhp2l1 PE=2 SV=4	Ribosomal protein L7Ae OS=Bombyx mori (Silk moth) PE=2 SV=1	IPR002415: H/ACA ribonucleoprotein complex, subunit Nhp2, eukaryote; IPR004037: Ribosomal protein L7Ae conserved site; IPR004038: Ribosomal protein L7Ae/L30e/S12e/Gadd45; IPR018492: Ribosomal protein L7Ae/L8/Nhp2 family	ribosomal protein L7Ae [Bombyx mori] >gi|87248593|gb|ABD36349.1| ribosomal protein L7Ae [Bombyx mori]	Bombyx mori ribosomal protein L7Ae (RpL7Ae), mRNA >gi|87248592|gb|DQ311405.1| Bombyx mori ribosomal protein L7Ae mRNA, complete cds
AK382733|fdpe26B17	187	1	0	0	7.54689	NHP2-like protein 1 OS=Rattus norvegicus GN=Nhp2l1 PE=2 SV=4	Ribosomal protein L7Ae OS=Bombyx mori (Silk moth) PE=2 SV=1	IPR002415: H/ACA ribonucleoprotein complex, subunit Nhp2, eukaryote; IPR004037: Ribosomal protein L7Ae conserved site; IPR004038: Ribosomal protein L7Ae/L30e/S12e/Gadd45; IPR018492: Ribosomal protein L7Ae/L8/Nhp2 family	ribosomal protein L7Ae [Bombyx mori] >gi|87248593|gb|ABD36349.1| ribosomal protein L7Ae [Bombyx mori]	Bombyx mori ribosomal protein L7Ae (RpL7Ae), mRNA >gi|87248592|gb|DQ311405.1| Bombyx mori ribosomal protein L7Ae mRNA, complete cds
gnl|UG|Bmo#S58873606	187	1	0	0	7.54689	NHP2-like protein 1 OS=Rattus norvegicus GN=Nhp2l1 PE=2 SV=4	Ribosomal protein L7Ae OS=Bombyx mori (Silk moth) PE=2 SV=1	IPR002415: H/ACA ribonucleoprotein complex, subunit Nhp2, eukaryote; IPR004037: Ribosomal protein L7Ae conserved site; IPR004038: Ribosomal protein L7Ae/L30e/S12e/Gadd45; IPR018492: Ribosomal protein L7Ae/L8/Nhp2 family	ribosomal protein L7Ae [Bombyx mori] >gi|87248593|gb|ABD36349.1| ribosomal protein L7Ae [Bombyx mori]	Bombyx mori ribosomal protein L7Ae (RpL7Ae), mRNA >gi|87248592|gb|DQ311405.1| Bombyx mori ribosomal protein L7Ae mRNA, complete cds
BGIBMGA001490-TA	351	2	0	0	7.45533	46 kDa FK506-binding nuclear protein OS=Spodoptera frugiperda GN=FKBP46 PE=2 SV=1	Peptidyl-prolyl cis-trans isomerase GN=FKBP45 OS=Bombyx mori (Silk moth) PE=2 SV=1	IPR001179: Peptidyl-prolyl cis-trans isomerase, FKBP-type, domain; IPR023566: Peptidyl-prolyl cis-trans isomerase, FKBP-type	45 kDa immunophilin FKBP45 [Bombyx mori] >gi|68160236|gb|AAY86706.1| 45 kDa immunophilin FKBP45 [Bombyx mori]	Bombyx mori 45 kDa immunophilin FKBP45 (Fkbp45), mRNA >gi|68160235|gb|DQ085777.1| Bombyx mori 45 kDa immunophilin FKBP45 (FKBP45) mRNA, complete cds
BGIBMGA009685-TA	175	1	0	0	7.45121	Putative uncharacterized protein DDB_G0293878 OS=Dictyostelium discoideum GN=DDB_G0293878 PE=4 SV=1	Putative uncharacterized protein GN=KGM_20484 OS=Danaus plexippus (Monarch butterfly) PE=4 SV=1	IPR000504: RNA recognition motif domain; IPR012677: Nucleotide-binding, alpha-beta plait	hypothetical protein TcasGA2_TC009936 [Tribolium castaneum]	--
BGIBMGA000074-TA	165	1	0	0	7.36632	rRNA 2'-O-methyltransferase fibrillarin OS=Drosophila erecta GN=Fib PE=3 SV=1	Fib GN=KGM_03265 OS=Danaus plexippus (Monarch butterfly) PE=3 SV=1	IPR000692: Fibrillarin; IPR020813: Fibrillarin, conserved site	GI18675 [Drosophila mojavensis] >gi|193911304|gb|EDW10171.1| GI18675 [Drosophila mojavensis]	TSA: Apis mellifera isotig16936.Amelova mRNA sequence
gnl|UG|Bmo#S32357229	483	3	0	0	7.33092	Heat shock protein 83 (Fragment) OS=Drosophila miranda GN=Hsp83 PE=3 SV=1	Heat shock protein 90 (Fragment) OS=Plodia interpunctella (Indianmeal moth) PE=2 SV=1	IPR001404: Heat shock protein Hsp90; IPR003594: ATPase-like, ATP-binding domain; IPR019805: Heat shock protein Hsp90, conserved site; IPR020575: Heat shock protein Hsp90, N-terminal	heat shock protein 90 [Plodia interpunctella]	Bombyx mori strain NB4D2 heat shock protein 90 gene, complete cds
gnl|UG|Bmo#S58881157	770	5	0	0	7.26679	Heat shock protein 83 OS=Anopheles gambiae GN=Hsp83 PE=3 SV=3	90-kDa heat shock protein GN=hsp90 OS=Bombyx mori (Silk moth) PE=2 SV=1	IPR001404: Heat shock protein Hsp90; IPR003594: ATPase-like, ATP-binding domain; IPR019805: Heat shock protein Hsp90, conserved site; IPR020568: Ribosomal protein S5 domain 2-type fold; IPR020575: Heat shock protein Hsp90, N-terminal	90-kDa heat shock protein [Bombyx mori] >gi|13699184|dbj|BAB41209.1| 90-kDa heat shock protein [Bombyx mori]	Bombyx mori 90-kDa heat shock protein (Hsp90), mRNA >gi|13699183|dbj|AB060275.1| Bombyx mori hsp90 mRNA for 90-kDa heat shock protein, complete cds
AK383602|MFB-13J09	770	5	0	0	7.26679	Heat shock protein 83 OS=Anopheles gambiae GN=Hsp83 PE=3 SV=3	90-kDa heat shock protein GN=hsp90 OS=Bombyx mori (Silk moth) PE=2 SV=1	IPR001404: Heat shock protein Hsp90; IPR003594: ATPase-like, ATP-binding domain; IPR019805: Heat shock protein Hsp90, conserved site; IPR020568: Ribosomal protein S5 domain 2-type fold; IPR020575: Heat shock protein Hsp90, N-terminal	90-kDa heat shock protein [Bombyx mori] >gi|13699184|dbj|BAB41209.1| 90-kDa heat shock protein [Bombyx mori]	Bombyx mori 90-kDa heat shock protein (Hsp90), mRNA >gi|13699183|dbj|AB060275.1| Bombyx mori hsp90 mRNA for 90-kDa heat shock protein, complete cds
gnl|UG|Bmo#S55957404	615	4	0	0	7.26444	Heat shock protein 83 OS=Anopheles gambiae GN=Hsp83 PE=3 SV=3	Heat shock protein (Fragment) OS=Choristoneura parallela (Spotted fireworm moth) PE=2 SV=1	IPR001404: Heat shock protein Hsp90	heat shock protein [Choristoneura parallela]	Bombyx mori strain NB4D2 heat shock protein 90 gene, complete cds
gnl|UG|Bmo#S58873410	147	1	0	0	7.19967	rRNA 2'-O-methyltransferase fibrillarin OS=Drosophila erecta GN=Fib PE=3 SV=1	Fib GN=KGM_03265 OS=Danaus plexippus (Monarch butterfly) PE=3 SV=1	IPR000692: Fibrillarin; IPR020813: Fibrillarin, conserved site	GI18675 [Drosophila mojavensis] >gi|193911304|gb|EDW10171.1| GI18675 [Drosophila mojavensis]	TSA: Apis mellifera isotig16936.Amelova mRNA sequence
AK384334|fcaL17C21	147	1	0	0	7.19967	rRNA 2'-O-methyltransferase fibrillarin OS=Drosophila erecta GN=Fib PE=3 SV=1	Fib GN=KGM_03265 OS=Danaus plexippus (Monarch butterfly) PE=3 SV=1	IPR000692: Fibrillarin; IPR020813: Fibrillarin, conserved site	GI18675 [Drosophila mojavensis] >gi|193911304|gb|EDW10171.1| GI18675 [Drosophila mojavensis]	TSA: Apis mellifera isotig16936.Amelova mRNA sequence
gnl|UG|Bmo#S58872045	283	2	0	0	7.14466	46 kDa FK506-binding nuclear protein OS=Spodoptera frugiperda GN=FKBP46 PE=2 SV=1	Peptidyl-prolyl cis-trans isomerase GN=FKBP45 OS=Bombyx mori (Silk moth) PE=2 SV=1	IPR001179: Peptidyl-prolyl cis-trans isomerase, FKBP-type, domain; IPR023566: Peptidyl-prolyl cis-trans isomerase, FKBP-type	45 kDa immunophilin FKBP45 [Bombyx mori] >gi|68160236|gb|AAY86706.1| 45 kDa immunophilin FKBP45 [Bombyx mori]	Bombyx mori 45 kDa immunophilin FKBP45 (Fkbp45), mRNA >gi|68160235|gb|DQ085777.1| Bombyx mori 45 kDa immunophilin FKBP45 (FKBP45) mRNA, complete cds
AK388471|fner17N13	283	2	0	0	7.14466	46 kDa FK506-binding nuclear protein OS=Spodoptera frugiperda GN=FKBP46 PE=2 SV=1	Peptidyl-prolyl cis-trans isomerase GN=FKBP45 OS=Bombyx mori (Silk moth) PE=2 SV=1	IPR001179: Peptidyl-prolyl cis-trans isomerase, FKBP-type, domain; IPR023566: Peptidyl-prolyl cis-trans isomerase, FKBP-type	45 kDa immunophilin FKBP45 [Bombyx mori] >gi|68160236|gb|AAY86706.1| 45 kDa immunophilin FKBP45 [Bombyx mori]	Bombyx mori 45 kDa immunophilin FKBP45 (Fkbp45), mRNA >gi|68160235|gb|DQ085777.1| Bombyx mori 45 kDa immunophilin FKBP45 (FKBP45) mRNA, complete cds
BGIBMGA004612-TA	805	6	0	0	7.06788	Heat shock protein 83 OS=Anopheles gambiae GN=Hsp83 PE=3 SV=3	90-kDa heat shock protein GN=hsp90 OS=Bombyx mori (Silk moth) PE=2 SV=1	IPR001404: Heat shock protein Hsp90; IPR003594: ATPase-like, ATP-binding domain; IPR019805: Heat shock protein Hsp90, conserved site; IPR020568: Ribosomal protein S5 domain 2-type fold; IPR020575: Heat shock protein Hsp90, N-terminal	90-kDa heat shock protein [Bombyx mori] >gi|13699184|dbj|BAB41209.1| 90-kDa heat shock protein [Bombyx mori]	Bombyx mori strain NB4D2 heat shock protein 90 gene, complete cds
AK386285|fprW01P05	652	6	0	0	6.76377	Nucleoplasmin-like protein OS=Drosophila melanogaster GN=Nlp PE=1 SV=1	Nucleoplasmin isoform 1 OS=Bombyx mori (Silk moth) PE=2 SV=1	IPR004301: Nucleoplasmin; IPR024057: Nucleoplasmin core	nucleoplasmin isoform 1 [Bombyx mori] >gi|87248549|gb|ABD36327.1| nucleoplasmin isoform 1 [Bombyx mori]	Bombyx mori nucleoplasmin (LOC692956), transcript variant 1, mRNA >gi|87248548|gb|DQ311383.1| Bombyx mori nucleoplasmin isoform 1 mRNA, complete cds
BGIBMGA002309-TA	708	7	0	0	6.66025	Nucleoplasmin-like protein OS=Drosophila melanogaster GN=Nlp PE=1 SV=1	Nucleoplasmin isoform 2 OS=Bombyx mori (Silk moth) PE=2 SV=1	IPR004301: Nucleoplasmin; IPR024057: Nucleoplasmin core	nucleoplasmin isoform 2 [Bombyx mori] >gi|87248551|gb|ABD36328.1| nucleoplasmin isoform 2 [Bombyx mori]	Bombyx mori nucleoplasmin (LOC692956), transcript variant 2, mRNA >gi|87248550|gb|DQ311384.1| Bombyx mori nucleoplasmin isoform 2 mRNA, complete cds
gnl|UG|Bmo#S58870862	590	6	0	0	6.61961	Nucleoplasmin-like protein OS=Drosophila melanogaster GN=Nlp PE=1 SV=1	Nucleoplasmin isoform 1 OS=Bombyx mori (Silk moth) PE=2 SV=1	IPR004301: Nucleoplasmin; IPR024057: Nucleoplasmin core	nucleoplasmin isoform 1 [Bombyx mori] >gi|87248549|gb|ABD36327.1| nucleoplasmin isoform 1 [Bombyx mori]	Bombyx mori nucleoplasmin (LOC692956), transcript variant 1, mRNA >gi|87248548|gb|DQ311383.1| Bombyx mori nucleoplasmin isoform 1 mRNA, complete cds
AK381524|fufe52G09	590	6	0	0	6.61961	Nucleoplasmin-like protein OS=Drosophila melanogaster GN=Nlp PE=1 SV=1	Nucleoplasmin isoform 1 OS=Bombyx mori (Silk moth) PE=2 SV=1	IPR004301: Nucleoplasmin; IPR024057: Nucleoplasmin core	nucleoplasmin isoform 1 [Bombyx mori] >gi|87248549|gb|ABD36327.1| nucleoplasmin isoform 1 [Bombyx mori]	Bombyx mori nucleoplasmin (LOC692956), transcript variant 1, mRNA >gi|87248548|gb|DQ311383.1| Bombyx mori nucleoplasmin isoform 1 mRNA, complete cds
AK384779|fcaL37H23_K01741	638	7	0	0	6.51006	Nucleoplasmin-like protein OS=Drosophila melanogaster GN=Nlp PE=1 SV=1	Nucleoplasmin isoform 1 OS=Bombyx mori (Silk moth) PE=2 SV=1	IPR004301: Nucleoplasmin; IPR024057: Nucleoplasmin core	nucleoplasmin isoform 1 [Bombyx mori] >gi|87248549|gb|ABD36327.1| nucleoplasmin isoform 1 [Bombyx mori]	Bombyx mori nucleoplasmin (LOC692956), transcript variant 1, mRNA >gi|87248548|gb|DQ311383.1| Bombyx mori nucleoplasmin isoform 1 mRNA, complete cds
AK380331|ftes42N01	162	2	0	0	6.33985	Pescadillo homolog OS=Drosophila willistoni GN=GK25349 PE=3 SV=1	Putative uncharacterized protein (Fragment) GN=SINV_15032 OS=Solenopsis invicta (Red imported fire ant) PE=4 SV=1	IPR001357: BRCT	hypothetical protein SINV_15032 [Solenopsis invicta]	TSA: Striacosta albicosta stalb_01_00000291 mRNA sequence
BGIBMGA006415-TA	311	4	0	0	6.28077	--	Chorion b-ZIP transcription factor GN=CbZ OS=Bombyx mori (Silk moth) PE=2 SV=1	IPR004827: Basic-leucine zipper (bZIP) transcription factor; IPR011700: Basic leucine zipper	chorion b-ZIP transcription factor [Bombyx mori] >gi|54401523|gb|AAV34566.1| chorion b-ZIP transcription factor [Bombyx mori]	Bombyx mori chorion b-ZIP transcription factor (Cbz), mRNA >gi|54401522|gb|AY618899.1| Bombyx mori chorion b-ZIP transcription factor (CbZ) mRNA, complete cds
gnl|UG|Bmo#S58878819	224	3	0	0	6.22239	Ribonucleoside-diphosphate reductase subunit M2 OS=Drosophila melanogaster GN=RnrS PE=1 SV=2	Ribonucleoside-diphosphate reductase small chain GN=KGM_20197 OS=Danaus plexippus (Monarch butterfly) PE=4 SV=1	IPR000358: Ribonucleotide reductase; IPR009078: Ferritin/ribonucleotide reductase-like; IPR012348: Ribonucleotide reductase-related	hypothetical protein AND_06323 [Anopheles darlingi]	Bombyx mori genomic DNA, chromosome 17, BAC clone:517G19, complete sequence
AK382161|fdpe08P04	224	3	0	0	6.22239	Ribonucleoside-diphosphate reductase subunit M2 OS=Drosophila melanogaster GN=RnrS PE=1 SV=2	Ribonucleoside-diphosphate reductase small chain GN=KGM_20197 OS=Danaus plexippus (Monarch butterfly) PE=4 SV=1	IPR000358: Ribonucleotide reductase; IPR009078: Ferritin/ribonucleotide reductase-like; IPR012348: Ribonucleotide reductase-related	hypothetical protein AND_06323 [Anopheles darlingi]	Bombyx mori genomic DNA, chromosome 17, BAC clone:517G19, complete sequence
gnl|UG|Bmo#S58880291	148	2	0	0	6.20945	--	Putative uncharacterized protein (Fragment) GN=EAG_00896 OS=Camponotus floridanus (Florida carpenter ant) PE=4 SV=1	IPR001584: Integrase, catalytic core; IPR012337: Ribonuclease H-like	hypothetical protein EAG_00896 [Camponotus floridanus]	Bombyx mori DNA, transposable element: LTR-Moriya_7603bp_Pao_group
AK381872|fwgP24C23	148	2	0	0	6.20945	--	Putative uncharacterized protein (Fragment) GN=EAG_00896 OS=Camponotus floridanus (Florida carpenter ant) PE=4 SV=1	IPR001584: Integrase, catalytic core; IPR012337: Ribonuclease H-like	hypothetical protein EAG_00896 [Camponotus floridanus]	Bombyx mori DNA, transposable element: LTR-Moriya_7603bp_Pao_group
AK378497|fmgV48O13	212	3	0	0	6.14296	--	Chorion b-ZIP transcription factor GN=CbZ OS=Bombyx mori (Silk moth) PE=2 SV=1	IPR004827: Basic-leucine zipper (bZIP) transcription factor; IPR011700: Basic leucine zipper	chorion b-ZIP transcription factor [Bombyx mori] >gi|54401523|gb|AAV34566.1| chorion b-ZIP transcription factor [Bombyx mori]	Bombyx mori chorion b-ZIP transcription factor (Cbz), mRNA >gi|54401522|gb|AY618899.1| Bombyx mori chorion b-ZIP transcription factor (CbZ) mRNA, complete cds
AK383820|MFB-23E16	280	4	0	0	6.12928	--	Chorion b-ZIP transcription factor GN=CbZ OS=Bombyx mori (Silk moth) PE=2 SV=1	IPR004827: Basic-leucine zipper (bZIP) transcription factor; IPR011700: Basic leucine zipper	chorion b-ZIP transcription factor [Bombyx mori] >gi|54401523|gb|AAV34566.1| chorion b-ZIP transcription factor [Bombyx mori]	Bombyx mori chorion b-ZIP transcription factor (Cbz), mRNA >gi|54401522|gb|AY618899.1| Bombyx mori chorion b-ZIP transcription factor (CbZ) mRNA, complete cds
gnl|UG|Bmo#S58879358	280	4	0	0	6.12928	--	Chorion b-ZIP transcription factor GN=CbZ OS=Bombyx mori (Silk moth) PE=2 SV=1	IPR004827: Basic-leucine zipper (bZIP) transcription factor; IPR011700: Basic leucine zipper	chorion b-ZIP transcription factor [Bombyx mori] >gi|54401523|gb|AAV34566.1| chorion b-ZIP transcription factor [Bombyx mori]	Bombyx mori chorion b-ZIP transcription factor (Cbz), mRNA >gi|54401522|gb|AY618899.1| Bombyx mori chorion b-ZIP transcription factor (CbZ) mRNA, complete cds
BGIBMGA012512-TA	136	2	0	0	6.08746	Arylsulfatase B OS=Rattus norvegicus GN=Arsb PE=2 SV=2	Glucosinolate sulphatase GN=gss OS=Plutella xylostella (Diamondback moth) PE=2 SV=1	IPR000917: Sulfatase; IPR017849: Alkaline phosphatase-like, alpha/beta/alpha; IPR017850: Alkaline-phosphatase-like, core domain	glucosinolate sulphatase [Plutella xylostella]	--
BGIBMGA013510-TA	252	4	0	0	5.97728	Ribonucleoside-diphosphate reductase subunit M2 OS=Drosophila melanogaster GN=RnrS PE=1 SV=2	Ribonucleoside-diphosphate reductase small chain GN=KGM_20197 OS=Danaus plexippus (Monarch butterfly) PE=4 SV=1	IPR000358: Ribonucleotide reductase; IPR009078: Ferritin/ribonucleotide reductase-like; IPR012348: Ribonucleotide reductase-related	hypothetical protein AND_06323 [Anopheles darlingi]	Bombyx mori genomic DNA, chromosome 17, BAC clone:517G19, complete sequence
BGIBMGA009699-TA	124	2	0	0	5.9542	T-complex protein 1 subunit epsilon OS=Rattus norvegicus GN=Cct5 PE=1 SV=1	Chaperonin GN=KGM_21728 OS=Danaus plexippus (Monarch butterfly) PE=3 SV=1	IPR002194: Chaperonin TCP-1, conserved site; IPR002423: Chaperonin Cpn60/TCP-1; IPR012718: T-complex protein 1, epsilon subunit; IPR017998: Chaperone, tailless complex polypeptide 1	T-complex protein 1 subunit epsilon [Culex quinquefasciatus] >gi|167863987|gb|EDS27370.1| T-complex protein 1 subunit epsilon [Culex quinquefasciatus]	TSA: Spodoptera littoralis CL1072Contig1.Spli mRNA sequence
gnl|UG|Bmo#S18469692	300	5	0	0	5.90689	--	Putative uncharacterized protein GN=TcasGA2_TC010684 OS=Tribolium castaneum (Red flour beetle) PE=4 SV=1	--	hypothetical protein TcasGA2_TC010684 [Tribolium castaneum]	Bombyx mori DNA, transposable element: LTR-Moriya_7603bp_Pao_group
BGIBMGA014211-TA	112	2	0	0	5.80735	Transketolase-like protein 2 OS=Mus musculus GN=Tktl2 PE=2 SV=1	Transketolase OS=Bombyx mori (Silk moth) PE=2 SV=1	IPR005474: Transketolase, N-terminal; IPR005475: Transketolase-like, pyrimidine-binding domain	transketolase [Bombyx mori] >gi|87248239|gb|ABD36172.1| transketolase [Bombyx mori]	Bombyx mori transketolase (LOC692848), mRNA >gi|87248238|gb|DQ311227.1| Bombyx mori transketolase mRNA, complete cds
AK386676|fprW22B20	167	3	0	0	5.79874	Pescadillo homolog OS=Drosophila mojavensis GN=GI18209 PE=3 SV=1	Pescadillo-like protein GN=G5I_02953 OS=Acromyrmex echinatior (Panamanian leafcutter ant) PE=4 SV=1	IPR001357: BRCT; IPR010613: Pescadillo	hypothetical protein SINV_15032 [Solenopsis invicta]	TSA: Striacosta albicosta stalb_01_00000291 mRNA sequence
gnl|UG|Bmo#S58871719	167	3	0	0	5.79874	Pescadillo homolog OS=Drosophila mojavensis GN=GI18209 PE=3 SV=1	Pescadillo-like protein GN=G5I_02953 OS=Acromyrmex echinatior (Panamanian leafcutter ant) PE=4 SV=1	IPR001357: BRCT; IPR010613: Pescadillo	hypothetical protein SINV_15032 [Solenopsis invicta]	TSA: Striacosta albicosta stalb_01_00000291 mRNA sequence
AK383949|fcaL01O13	205	4	0	0	5.67948	--	--	--	--	Bombyx mori genomic DNA, chromosome 15, BAC clone:536D15, complete sequence
AK384809|fcaL38O04_K01041	102	2	0	0	5.67243	Small nuclear ribonucleoprotein Sm D3 OS=Drosophila melanogaster GN=SmD3 PE=1 SV=1	Putative uncharacterized protein GN=KGM_15381 OS=Danaus plexippus (Monarch butterfly) PE=4 SV=1	IPR001163: Like-Sm ribonucleoprotein (LSM) domain; IPR006649: Like-Sm ribonucleoprotein (LSM) domain, eukaryotic/archaea-type; IPR010920: Like-Sm ribonucleoprotein (LSM)-related domain	AGAP012380-PA [Anopheles gambiae str. PEST] >gi|55234277|gb|EAA00211.2| AGAP012380-PA [Anopheles gambiae str. PEST]	TSA: Eulaema nigrita Contig21062.Euni mRNA sequence
BGIBMGA010666-TA	147	3	0	0	5.61471	T-complex protein 1 subunit delta OS=Aedes triseriatus PE=2 SV=1	T-complex protein 1 subunit delta OS=Bombyx mori (Silk moth) PE=2 SV=1	IPR002194: Chaperonin TCP-1, conserved site; IPR002423: Chaperonin Cpn60/TCP-1; IPR012717: T-complex protein 1, delta subunit; IPR017998: Chaperone, tailless complex polypeptide 1	chaperonin subunit 4 delta [Bombyx mori] >gi|87248081|gb|ABD36093.1| chaperonin subunit 4 delta [Bombyx mori]	Bombyx mori chaperonin subunit 4 delta (LOC692795), mRNA >gi|87248080|gb|DQ311148.1| Bombyx mori chaperonin subunit 4 delta mRNA, complete cds
gnl|UG|Bmo#S58872943	126	3	0	0	5.39232	T-complex protein 1 subunit delta OS=Aedes triseriatus PE=2 SV=1	T-complex protein 1 subunit delta OS=Bombyx mori (Silk moth) PE=2 SV=1	IPR002194: Chaperonin TCP-1, conserved site; IPR002423: Chaperonin Cpn60/TCP-1; IPR012717: T-complex protein 1, delta subunit; IPR017998: Chaperone, tailless complex polypeptide 1	chaperonin subunit 4 delta [Bombyx mori] >gi|87248081|gb|ABD36093.1| chaperonin subunit 4 delta [Bombyx mori]	Bombyx mori chaperonin subunit 4 delta (LOC692795), mRNA >gi|87248080|gb|DQ311148.1| Bombyx mori chaperonin subunit 4 delta mRNA, complete cds
AK386361|fprW04C14	126	3	0	0	5.39232	T-complex protein 1 subunit delta OS=Aedes triseriatus PE=2 SV=1	T-complex protein 1 subunit delta OS=Bombyx mori (Silk moth) PE=2 SV=1	IPR002194: Chaperonin TCP-1, conserved site; IPR002423: Chaperonin Cpn60/TCP-1; IPR012717: T-complex protein 1, delta subunit; IPR017998: Chaperone, tailless complex polypeptide 1	chaperonin subunit 4 delta [Bombyx mori] >gi|87248081|gb|ABD36093.1| chaperonin subunit 4 delta [Bombyx mori]	Bombyx mori chaperonin subunit 4 delta (LOC692795), mRNA >gi|87248080|gb|DQ311148.1| Bombyx mori chaperonin subunit 4 delta mRNA, complete cds
AK382302|fdpe13B24	122	3	0	0	5.34577	Small nuclear ribonucleoprotein Sm D3 OS=Drosophila melanogaster GN=SmD3 PE=1 SV=1	Putative uncharacterized protein GN=KGM_15381 OS=Danaus plexippus (Monarch butterfly) PE=4 SV=1	IPR001163: Like-Sm ribonucleoprotein (LSM) domain; IPR006649: Like-Sm ribonucleoprotein (LSM) domain, eukaryotic/archaea-type; IPR010920: Like-Sm ribonucleoprotein (LSM)-related domain	AGAP012380-PA [Anopheles gambiae str. PEST] >gi|55234277|gb|EAA00211.2| AGAP012380-PA [Anopheles gambiae str. PEST]	TSA: Eulaema nigrita Contig21062.Euni mRNA sequence
BGIBMGA010739-TA	161	4	0	0	5.33092	Nucleolar protein 56 OS=Bos taurus GN=NOP56 PE=2 SV=1	Putative nucleolar KKE/D repeat protein DmNOP56 GN=KGM_02323 OS=Danaus plexippus (Monarch butterfly) PE=4 SV=1	IPR002687: Pre-mRNA processing ribonucleoprotein, snoRNA-binding domain; IPR012974: NOP5, N-terminal; IPR012976: NOSIC	PREDICTED: similar to Nop56 CG13849-PA [Tribolium castaneum] >gi|270013678|gb|EFA10126.1| hypothetical protein TcasGA2_TC012306 [Tribolium castaneum]	TSA: Striacosta albicosta stalb_01_00003616 mRNA sequence
gnl|UG|Bmo#S58878853	158	4	0	0	5.30378	Nucleolar protein 56 OS=Bos taurus GN=NOP56 PE=2 SV=1	Putative nucleolar KKE/D repeat protein DmNOP56 GN=KGM_02323 OS=Danaus plexippus (Monarch butterfly) PE=4 SV=1	IPR002687: Pre-mRNA processing ribonucleoprotein, snoRNA-binding domain; IPR012974: NOP5, N-terminal; IPR012976: NOSIC	PREDICTED: similar to Nop56 CG13849-PA [Tribolium castaneum] >gi|270013678|gb|EFA10126.1| hypothetical protein TcasGA2_TC012306 [Tribolium castaneum]	TSA: Striacosta albicosta stalb_01_00003616 mRNA sequence
AK382127|fdpe08C08	158	4	0	0	5.30378	Nucleolar protein 56 OS=Bos taurus GN=NOP56 PE=2 SV=1	Putative nucleolar KKE/D repeat protein DmNOP56 GN=KGM_02323 OS=Danaus plexippus (Monarch butterfly) PE=4 SV=1	IPR002687: Pre-mRNA processing ribonucleoprotein, snoRNA-binding domain; IPR012974: NOP5, N-terminal; IPR012976: NOSIC	PREDICTED: similar to Nop56 CG13849-PA [Tribolium castaneum] >gi|270013678|gb|EFA10126.1| hypothetical protein TcasGA2_TC012306 [Tribolium castaneum]	TSA: Striacosta albicosta stalb_01_00003616 mRNA sequence
gnl|UG|Bmo#S58876737	272	7	0	0	5.28011	NADH-ubiquinone oxidoreductase chain 1 OS=Anopheles gambiae GN=mt:ND1 PE=3 SV=1	NADH-ubiquinone oxidoreductase chain 1 GN=NADH1 OS=Bombyx mori (Silk moth) PE=3 SV=1	IPR001694: NADH:ubiquinone oxidoreductase, subunit 1/F420H2 oxidoreductase subunit H	NADH dehydrogenase subunit 1 [Bombyx mori] >gi|8163618|gb|AAF73763.1|AF149768_7 NADH dehydrogenase 1 [Bombyx mori] >gi|15213119|gb|AAK85729.1| NADH dehydrogenase 1 [Bombyx mori] >gi|210062316|gb|ACJ06199.1| NADH dehydrogenase subunit 1 [Bombyx mandarina]	Bombyx mori isolate C108 mitochondrion, complete genome
BGIBMGA006022-TA	192	5	0	0	5.26303	La protein homolog OS=Aedes albopictus PE=1 SV=1	Putative uncharacterized protein GN=KGM_09976 OS=Danaus plexippus (Monarch butterfly) PE=4 SV=1	IPR000504: RNA recognition motif domain; IPR002344: Lupus La protein; IPR006630: RNA-binding protein Lupus La; IPR011991: Winged helix-turn-helix transcription repressor DNA-binding; IPR012677: Nucleotide-binding, alpha-beta plait; IPR014886: RNA-binding motif	lupus la ribonucleoprotein [Aedes aegypti] >gi|108880822|gb|EAT45047.1| lupus la ribonucleoprotein [Aedes aegypti]	--
AK385724|fphe05H21	145	4	0	0	5.17991	Inducible metalloproteinase inhibitor protein OS=Galleria mellonella GN=IMPI PE=1 SV=2	Putative uncharacterized protein GN=KGM_17335 OS=Danaus plexippus (Monarch butterfly) PE=4 SV=1	IPR002919: Protease inhibitor I8, cysteine-rich trypsin inhibitor-like	RecName: Full=Inducible metalloproteinase inhibitor protein; Contains: RecName: Full=IMPI alpha; Flags: Precursor >gi|33145975|emb|CAE12200.1| inducible metalloproteinase inhibitor protein [Galleria mellonella] >gi|34485736|gb|AAQ73240.1| inducible metalloproteinase inhibitor [Galleria mellonella]	--
gnl|UG|Bmo#S58876542	145	4	0	0	5.17991	Inducible metalloproteinase inhibitor protein OS=Galleria mellonella GN=IMPI PE=1 SV=2	Putative uncharacterized protein GN=KGM_17335 OS=Danaus plexippus (Monarch butterfly) PE=4 SV=1	IPR002919: Protease inhibitor I8, cysteine-rich trypsin inhibitor-like	RecName: Full=Inducible metalloproteinase inhibitor protein; Contains: RecName: Full=IMPI alpha; Flags: Precursor >gi|33145975|emb|CAE12200.1| inducible metalloproteinase inhibitor protein [Galleria mellonella] >gi|34485736|gb|AAQ73240.1| inducible metalloproteinase inhibitor [Galleria mellonella]	--
gnl|UG|Bmo#S58876777	181	5	0	0	5.17792	La protein homolog OS=Aedes albopictus PE=1 SV=1	Putative uncharacterized protein GN=KGM_09976 OS=Danaus plexippus (Monarch butterfly) PE=4 SV=1	IPR000504: RNA recognition motif domain; IPR002344: Lupus La protein; IPR006630: RNA-binding protein Lupus La; IPR011991: Winged helix-turn-helix transcription repressor DNA-binding; IPR012677: Nucleotide-binding, alpha-beta plait; IPR014886: RNA-binding motif	lupus la ribonucleoprotein [Aedes aegypti] >gi|108880822|gb|EAT45047.1| lupus la ribonucleoprotein [Aedes aegypti]	--
AK383921|MFB-27E14	181	5	0	0	5.17792	La protein homolog OS=Aedes albopictus PE=1 SV=1	Putative uncharacterized protein GN=KGM_09976 OS=Danaus plexippus (Monarch butterfly) PE=4 SV=1	IPR000504: RNA recognition motif domain; IPR002344: Lupus La protein; IPR006630: RNA-binding protein Lupus La; IPR011991: Winged helix-turn-helix transcription repressor DNA-binding; IPR012677: Nucleotide-binding, alpha-beta plait; IPR014886: RNA-binding motif	lupus la ribonucleoprotein [Aedes aegypti] >gi|108880822|gb|EAT45047.1| lupus la ribonucleoprotein [Aedes aegypti]	--
gnl|UG|Bmo#S31276504	143	4	0	0	5.15987	Transketolase-like protein 2 OS=Mus musculus GN=Tktl2 PE=2 SV=1	Transketolase OS=Bombyx mori (Silk moth) PE=2 SV=1	IPR005474: Transketolase, N-terminal; IPR005475: Transketolase-like, pyrimidine-binding domain; IPR005476: Transketolase, C-terminal; IPR009014: Transketolase, C-terminal/Pyruvate-ferredoxin oxidoreductase, domain II; IPR015941: Transketolase-like, C-terminal; IPR020826: Transketolase binding site	transketolase [Bombyx mori] >gi|87248239|gb|ABD36172.1| transketolase [Bombyx mori]	Bombyx mori transketolase (LOC692848), mRNA >gi|87248238|gb|DQ311227.1| Bombyx mori transketolase mRNA, complete cds
gnl|UG|Bmo#S18527423	141	4	0	0	5.13955	--	MBF2 (Fragment) OS=Bombyx mori (Silk moth) PE=2 SV=1	--	MBF2 [Bombyx mori]	Bombyx mori mRNA for MBF2, partial cds
AK386464|fprW08L08	272	8	0	0	5.08746	Myelin P2 protein OS=Homo sapiens GN=PMP2 PE=1 SV=3	Putative cellular retinoic acid binding protein GN=BmFABP1 OS=Bombyx mori (Silk moth) PE=2 SV=1	IPR000463: Cytosolic fatty-acid binding; IPR000566: Lipocalin/cytosolic fatty-acid binding protein domain; IPR011038: Calycin-like; IPR012674: Calycin	putative cellular retinoic acid binding protein [Bombyx mori] >gi|87248479|gb|ABD36292.1| cellular retinoic acid binding protein [Bombyx mori] >gi|108793850|gb|ABG20590.1| cellular retinoic acid binding protein [Bombyx mori] >gi|109119899|dbj|BAE96009.1| fatty acid binding protein 1 [Bombyx mori] >gi|118500451|gb|ABK97427.1| cellular retinoic acid binding protein [Bombyx mori]	Bombyx mori putative cellular retinoic acid binding protein mRNA, complete cds
AK382590|fdpe22E01	135	4	0	0	5.07682	Histone H2B OS=Drosophila teissieri GN=His2B PE=3 SV=3	Histone H2B GN=H2B-L OS=Bombyx mori (Silk moth) PE=2 SV=1	IPR000558: Histone H2B; IPR007125: Histone core; IPR009072: Histone-fold	histone H2B-like protein [Bombyx mori] >gi|223670747|dbj|BAH22618.1| histone H2B-like protein [Bombyx mori]	Bombyx mori histone H2B-like protein (H2b-l), mRNA >gi|223670746|dbj|AB481112.1| Bombyx mori H2B-L mRNA for histone H2B-like protein, complete cds
AK382486|fdpe18N13_K04851	134	4	0	0	5.06609	Histone H2B OS=Drosophila teissieri GN=His2B PE=3 SV=3	Histone H2B GN=H2B-L OS=Bombyx mori (Silk moth) PE=2 SV=1	IPR000558: Histone H2B; IPR007125: Histone core; IPR009072: Histone-fold	histone H2B-like protein [Bombyx mori] >gi|223670747|dbj|BAH22618.1| histone H2B-like protein [Bombyx mori]	Bombyx mori histone H2B-like protein (H2b-l), mRNA >gi|223670746|dbj|AB481112.1| Bombyx mori H2B-L mRNA for histone H2B-like protein, complete cds
gnl|UG|Bmo#S30065758	260	8	0	0	5.02237	Myelin P2 protein OS=Homo sapiens GN=PMP2 PE=1 SV=3	Putative cellular retinoic acid binding protein GN=BmFABP1 OS=Bombyx mori (Silk moth) PE=2 SV=1	IPR000463: Cytosolic fatty-acid binding; IPR000566: Lipocalin/cytosolic fatty-acid binding protein domain; IPR011038: Calycin-like; IPR012674: Calycin	putative cellular retinoic acid binding protein [Bombyx mori] >gi|87248479|gb|ABD36292.1| cellular retinoic acid binding protein [Bombyx mori] >gi|108793850|gb|ABG20590.1| cellular retinoic acid binding protein [Bombyx mori] >gi|109119899|dbj|BAE96009.1| fatty acid binding protein 1 [Bombyx mori] >gi|118500451|gb|ABK97427.1| cellular retinoic acid binding protein [Bombyx mori]	Bombyx mori putative cellular retinoic acid binding protein mRNA, complete cds
AK381023|fufe27H14	158	5	0	0	4.98185	Proliferating cell nuclear antigen OS=Bombyx mori GN=PCNA PE=2 SV=1	Proliferating cell nuclear antigen GN=pcna OS=Spodoptera frugiperda (Fall armyworm) PE=2 SV=1	IPR000730: Proliferating cell nuclear antigen, PCNA; IPR022648: Proliferating cell nuclear antigen, PCNA, N-terminal; IPR022649: Proliferating cell nuclear antigen, PCNA, C-terminal; IPR022659: Proliferating cell nuclear antigen, PCNA, conserved site	proliferating cell nuclear antigen [Spodoptera frugiperda] >gi|45735464|dbj|BAD13299.1| proliferating cell nuclear antigen [Spodoptera frugiperda]	Bombyx mori proliferating cell nuclear antigen (Pcna), mRNA >gi|1944020|dbj|AB002264.1| Bombyx mori mRNA for PCNA, complete cds
AK383467|MFB-07N08	153	5	0	0	4.93546	Transketolase-like protein 2 OS=Mus musculus GN=Tktl2 PE=2 SV=1	Transketolase OS=Bombyx mori (Silk moth) PE=2 SV=1	IPR005474: Transketolase, N-terminal; IPR005475: Transketolase-like, pyrimidine-binding domain; IPR005476: Transketolase, C-terminal; IPR009014: Transketolase, C-terminal/Pyruvate-ferredoxin oxidoreductase, domain II; IPR015941: Transketolase-like, C-terminal; IPR020826: Transketolase binding site	transketolase [Bombyx mori] >gi|87248239|gb|ABD36172.1| transketolase [Bombyx mori]	Bombyx mori transketolase (LOC692848), mRNA >gi|87248238|gb|DQ311227.1| Bombyx mori transketolase mRNA, complete cds
gnl|UG|Dm#S13366052	151	5	0	0	4.91648	60S ribosomal protein L27a OS=Drosophila melanogaster GN=RpL27A PE=2 SV=2	Similar to Drosophila melanogaster RpL27A (Fragment) GN=RpL27A OS=Drosophila yakuba (Fruit fly) PE=2 SV=1	--	similar to Drosophila melanogaster RpL27A [Drosophila yakuba]	Drosophila melanogaster ribosomal protein L27A (RpL27A), transcript variant B, mRNA
gnl|UG|Bmo#S58870625	143	5	0	0	4.83794	T-complex protein 1 subunit theta OS=Gallus gallus GN=CCT8 PE=1 SV=3	Chaperonin OS=Bombyx mori (Silk moth) PE=2 SV=1	IPR002194: Chaperonin TCP-1, conserved site; IPR002423: Chaperonin Cpn60/TCP-1; IPR012721: T-complex protein 1, theta subunit; IPR017998: Chaperone, tailless complex polypeptide 1	chaperonin [Bombyx mori] >gi|119866050|gb|ABM05494.1| chaperonin [Bombyx mori]	Bombyx mori chaperonin (LOC791084), mRNA >gi|119866049|gb|EF105369.1| Bombyx mori chaperonin mRNA, complete cds
AK384975|fcaL46E24	143	5	0	0	4.83794	T-complex protein 1 subunit theta OS=Gallus gallus GN=CCT8 PE=1 SV=3	Chaperonin OS=Bombyx mori (Silk moth) PE=2 SV=1	IPR002194: Chaperonin TCP-1, conserved site; IPR002423: Chaperonin Cpn60/TCP-1; IPR012721: T-complex protein 1, theta subunit; IPR017998: Chaperone, tailless complex polypeptide 1	chaperonin [Bombyx mori] >gi|119866050|gb|ABM05494.1| chaperonin [Bombyx mori]	Bombyx mori chaperonin (LOC791084), mRNA >gi|119866049|gb|EF105369.1| Bombyx mori chaperonin mRNA, complete cds
AK383629|MFB-14N12	268	10	0	0	4.74416	Transcription factor BTF3 homolog 4 OS=Xenopus tropicalis GN=btf3l4 PE=2 SV=1	Putative uncharacterized protein GN=KGM_14645 OS=Danaus plexippus (Monarch butterfly) PE=4 SV=1	IPR002715: Nascent polypeptide-associated complex NAC	hypothetical protein SINV_01877 [Solenopsis invicta]	TSA: Spodoptera littoralis CL244Contig1.Spli mRNA sequence
gnl|UG|Bmo#S58881130	268	10	0	0	4.74416	Transcription factor BTF3 homolog 4 OS=Xenopus tropicalis GN=btf3l4 PE=2 SV=1	Putative uncharacterized protein GN=KGM_14645 OS=Danaus plexippus (Monarch butterfly) PE=4 SV=1	IPR002715: Nascent polypeptide-associated complex NAC	hypothetical protein SINV_01877 [Solenopsis invicta]	TSA: Spodoptera littoralis CL244Contig1.Spli mRNA sequence
gnl|UG|Bmo#S18414335	106	4	0	0	4.72792	Glutathione S-transferase 2 OS=Manduca sexta GN=GST2 PE=2 SV=1	Glutathione S-transferase sigma OS=Bombyx mori (Silk moth) PE=2 SV=1	IPR004045: Glutathione S-transferase, N-terminal; IPR010987: Glutathione S-transferase, C-terminal-like; IPR012336: Thioredoxin-like fold; IPR017933: Glutathione S-transferase/chloride channel, C-terminal	glutathione S-transferase sigma 2 [Bombyx mori] >gi|61287207|dbj|BAD91107.1| glutathione S-transferase sigma [Bombyx mori]	Bombyx mori glutathione S-transferase sigma 2 (GSTs2), mRNA >gi|61287206|dbj|AB206971.1| Bombyx mori GST sigma mRNA for glutathione S-transferase sigma, complete cds
gnl|UG|Bmo#S58872606	158	6	0	0	4.71882	60 kDa heat shock protein, mitochondrial OS=Drosophila melanogaster GN=Hsp60 PE=1 SV=3	Heat shock protein 60 OS=Chilo suppressalis (striped riceborer) PE=2 SV=1	IPR001844: Chaperonin Cpn60; IPR002423: Chaperonin Cpn60/TCP-1; IPR018370: Chaperonin Cpn60, conserved site	heat shock protein 60 [Chilo suppressalis]	Chilo suppressalis heat shock protein 60 mRNA, complete cds
AK386498|fprW10F23	158	6	0	0	4.71882	60 kDa heat shock protein, mitochondrial OS=Drosophila melanogaster GN=Hsp60 PE=1 SV=3	Heat shock protein 60 OS=Chilo suppressalis (striped riceborer) PE=2 SV=1	IPR001844: Chaperonin Cpn60; IPR002423: Chaperonin Cpn60/TCP-1; IPR018370: Chaperonin Cpn60, conserved site	heat shock protein 60 [Chilo suppressalis]	Chilo suppressalis heat shock protein 60 mRNA, complete cds
gnl|UG|Bmo#S18489970	104	4	0	0	4.70044	Transcriptional regulator ATRX homolog OS=Caenorhabditis elegans GN=xnp-1 PE=1 SV=1	Putative uncharacterized protein GN=KGM_17482 OS=Danaus plexippus (Monarch butterfly) PE=4 SV=1	--	hypothetical protein DICPUDRAFT_82237 [Dictyostelium purpureum]	TSA: Spodoptera littoralis CL1816Contig1.Spli mRNA sequence
BGIBMGA011508-TA	155	6	0	0	4.69116	T-complex protein 1 subunit theta OS=Gallus gallus GN=CCT8 PE=1 SV=3	Chaperonin OS=Bombyx mori (Silk moth) PE=2 SV=1	IPR002423: Chaperonin Cpn60/TCP-1; IPR012721: T-complex protein 1, theta subunit; IPR017998: Chaperone, tailless complex polypeptide 1	chaperonin [Bombyx mori] >gi|119866050|gb|ABM05494.1| chaperonin [Bombyx mori]	Bombyx mori chaperonin (LOC791084), mRNA >gi|119866049|gb|EF105369.1| Bombyx mori chaperonin mRNA, complete cds
gnl|UG|Bmo#S18527341	155	6	0	0	4.69116	Serine protease inhibitor 3/4 (Fragment) OS=Lonomia obliqua PE=1 SV=1	Serpin-2 OS=Bombyx mori (Silk moth) PE=2 SV=1	IPR000215: Protease inhibitor I4, serpin; IPR023795: Protease inhibitor I4, serpin, conserved site; IPR023796: Serpin domain	serine protease inhibitor 2 [Bombyx mori] >gi|7341330|gb|AAF61252.1|AF242200_1 serpin-2 [Bombyx mori]	Bombyx mori serine protease inhibitor 2 (serpin-2), mRNA >gi|7341329|gb|AF242200.1|AF242200 Bombyx mori serpin-2 mRNA, complete cds
AK386124|fphe21O09	154	6	0	0	4.68182	Proliferating cell nuclear antigen OS=Bombyx mori GN=PCNA PE=2 SV=1	Proliferating cell nuclear antigen GN=pcna OS=Spodoptera frugiperda (Fall armyworm) PE=2 SV=1	IPR000730: Proliferating cell nuclear antigen, PCNA; IPR022648: Proliferating cell nuclear antigen, PCNA, N-terminal; IPR022649: Proliferating cell nuclear antigen, PCNA, C-terminal; IPR022659: Proliferating cell nuclear antigen, PCNA, conserved site	proliferating cell nuclear antigen [Spodoptera frugiperda] >gi|45735464|dbj|BAD13299.1| proliferating cell nuclear antigen [Spodoptera frugiperda]	Bombyx mori proliferating cell nuclear antigen (Pcna), mRNA >gi|1944020|dbj|AB002264.1| Bombyx mori mRNA for PCNA, complete cds
gnl|UG|Bmo#S58873185	154	6	0	0	4.68182	Proliferating cell nuclear antigen OS=Bombyx mori GN=PCNA PE=2 SV=1	Proliferating cell nuclear antigen GN=pcna OS=Spodoptera frugiperda (Fall armyworm) PE=2 SV=1	IPR000730: Proliferating cell nuclear antigen, PCNA; IPR022648: Proliferating cell nuclear antigen, PCNA, N-terminal; IPR022649: Proliferating cell nuclear antigen, PCNA, C-terminal; IPR022659: Proliferating cell nuclear antigen, PCNA, conserved site	proliferating cell nuclear antigen [Spodoptera frugiperda] >gi|45735464|dbj|BAD13299.1| proliferating cell nuclear antigen [Spodoptera frugiperda]	Bombyx mori proliferating cell nuclear antigen (Pcna), mRNA >gi|1944020|dbj|AB002264.1| Bombyx mori mRNA for PCNA, complete cds
AK378868|fner44B21_K00077	203	8	0	0	4.66534	Serine protease inhibitor 3/4 (Fragment) OS=Lonomia obliqua PE=1 SV=1	Serpin-2 OS=Bombyx mori (Silk moth) PE=2 SV=1	IPR000215: Protease inhibitor I4, serpin; IPR023795: Protease inhibitor I4, serpin, conserved site; IPR023796: Serpin domain	serpin-2 [Bombyx mandarina]	Bombyx mori serine protease inhibitor 2 (serpin-2), mRNA >gi|7341329|gb|AF242200.1|AF242200 Bombyx mori serpin-2 mRNA, complete cds
AK383515|MFB-10B13	126	5	0	0	4.65535	Ribosome biogenesis protein BRX1 homolog OS=Drosophila melanogaster GN=CG11583 PE=2 SV=2	Putative brix domain-containing protein 2 GN=KGM_16638 OS=Danaus plexippus (Monarch butterfly) PE=4 SV=1	IPR004154: Anticodon-binding; IPR007109: Brix domain	PREDICTED: similar to brix domain-containing protein 2 [Tribolium castaneum] >gi|270013383|gb|EFA09831.1| hypothetical protein TcasGA2_TC011978 [Tribolium castaneum]	TSA: Striacosta albicosta stalb_01_00000542 mRNA sequence
gnl|UG|Bmo#S58881244	126	5	0	0	4.65535	Ribosome biogenesis protein BRX1 homolog OS=Drosophila melanogaster GN=CG11583 PE=2 SV=2	Putative brix domain-containing protein 2 GN=KGM_16638 OS=Danaus plexippus (Monarch butterfly) PE=4 SV=1	IPR004154: Anticodon-binding; IPR007109: Brix domain	PREDICTED: similar to brix domain-containing protein 2 [Tribolium castaneum] >gi|270013383|gb|EFA09831.1| hypothetical protein TcasGA2_TC011978 [Tribolium castaneum]	TSA: Striacosta albicosta stalb_01_00000542 mRNA sequence
BGIBMGA000312-TA	100	4	0	0	4.64386	Serine/arginine repetitive matrix protein 1 OS=Gallus gallus GN=SRRM1 PE=2 SV=1	Putative uncharacterized protein GN=KGM_17482 OS=Danaus plexippus (Monarch butterfly) PE=4 SV=1	IPR002483: Splicing factor PWI	hypothetical protein TcasGA2_TC013178 [Tribolium castaneum]	TSA: Striacosta albicosta stalb_01_00002716 mRNA sequence
BGIBMGA007720-TA	236	10	0	0	4.56071	Serine protease inhibitor 3/4 (Fragment) OS=Lonomia obliqua PE=1 SV=1	Serpin-2 OS=Bombyx mori (Silk moth) PE=2 SV=1	IPR000215: Protease inhibitor I4, serpin; IPR023796: Serpin domain	serpin-2 [Bombyx mandarina]	Bombyx mandarina serpin-2 mRNA, complete cds
AK378928|fner49N07_K00262-5isoform	188	8	0	0	4.55459	Serine protease inhibitor 3/4 (Fragment) OS=Lonomia obliqua PE=1 SV=1	Serpin-2 OS=Bombyx mori (Silk moth) PE=2 SV=1	IPR000215: Protease inhibitor I4, serpin; IPR023795: Protease inhibitor I4, serpin, conserved site; IPR023796: Serpin domain	serpin-2 [Bombyx mandarina]	Bombyx mori serine protease inhibitor 2 (serpin-2), mRNA >gi|7341329|gb|AF242200.1|AF242200 Bombyx mori serpin-2 mRNA, complete cds
gnl|UG|Bmo#S58876869	117	5	0	0	4.54844	Serine/arginine repetitive matrix protein 1 OS=Pongo abelii GN=SRRM1 PE=2 SV=1	Putative uncharacterized protein GN=KGM_17482 OS=Danaus plexippus (Monarch butterfly) PE=4 SV=1	IPR002483: Splicing factor PWI	hypothetical protein TcasGA2_TC013178 [Tribolium castaneum]	TSA: Striacosta albicosta stalb_01_00002716 mRNA sequence
AK382428|fdpe17K23	117	5	0	0	4.54844	Serine/arginine repetitive matrix protein 1 OS=Pongo abelii GN=SRRM1 PE=2 SV=1	Putative uncharacterized protein GN=KGM_17482 OS=Danaus plexippus (Monarch butterfly) PE=4 SV=1	IPR002483: Splicing factor PWI	hypothetical protein TcasGA2_TC013178 [Tribolium castaneum]	TSA: Striacosta albicosta stalb_01_00002716 mRNA sequence
gnl|UG|Bmo#S58872802	140	6	0	0	4.54432	Serine protease inhibitor 3/4 (Fragment) OS=Lonomia obliqua PE=1 SV=1	Serpin-2 OS=Bombyx mori (Silk moth) PE=2 SV=1	IPR000215: Protease inhibitor I4, serpin; IPR023796: Serpin domain	serpin-2 [Bombyx mandarina]	Bombyx mori serine protease inhibitor 2 (serpin-2), mRNA >gi|7341329|gb|AF242200.1|AF242200 Bombyx mori serpin-2 mRNA, complete cds
AK388157|fcaL15A14	140	6	0	0	4.54432	Serine protease inhibitor 3/4 (Fragment) OS=Lonomia obliqua PE=1 SV=1	Serpin-2 OS=Bombyx mori (Silk moth) PE=2 SV=1	IPR000215: Protease inhibitor I4, serpin; IPR023796: Serpin domain	serpin-2 [Bombyx mandarina]	Bombyx mori serine protease inhibitor 2 (serpin-2), mRNA >gi|7341329|gb|AF242200.1|AF242200 Bombyx mori serpin-2 mRNA, complete cds
AK385504|e10019K03	160	7	0	0	4.51457	Serine protease inhibitor 3/4 (Fragment) OS=Lonomia obliqua PE=1 SV=1	Serpin-2 OS=Bombyx mori (Silk moth) PE=2 SV=1	IPR000215: Protease inhibitor I4, serpin; IPR023795: Protease inhibitor I4, serpin, conserved site; IPR023796: Serpin domain	serpin-2 [Bombyx mandarina]	Bombyx mori serine protease inhibitor 2 (serpin-2), mRNA >gi|7341329|gb|AF242200.1|AF242200 Bombyx mori serpin-2 mRNA, complete cds
gnl|UG|Bmo#S58877337	114	5	0	0	4.51096	Bifunctional purine biosynthesis protein PURH OS=Gallus gallus GN=ATIC PE=1 SV=1	Putative 5-aminoimidazole-4-carboxamide ribonucleotide formyltransferase/IMP cyclohydrolase GN=KGM_03523 OS=Danaus plexippus (Monarch butterfly) PE=4 SV=1	IPR002695: AICARFT/IMPCHase bienzyme; IPR011607: Methylglyoxal synthase-like domain; IPR016193: Cytidine deaminase-like; IPR024050: AICAR transformylase, insert domain; IPR024051: AICAR transformylase domain	PREDICTED: similar to 5-aminoimidazole-4-carboxamide ribonucleotide formyltransferase/IMP cyclohydrolase [Tribolium castaneum] >gi|270002383|gb|EEZ98830.1| hypothetical protein TcasGA2_TC004437 [Tribolium castaneum]	Ixodes scapularis aminoimidazole-4-carboxamide ribonucleotidetransformylase/IMP cyclohydrolase, putative, mRNA
AK385530|e10021C07	114	5	0	0	4.51096	Bifunctional purine biosynthesis protein PURH OS=Gallus gallus GN=ATIC PE=1 SV=1	Putative 5-aminoimidazole-4-carboxamide ribonucleotide formyltransferase/IMP cyclohydrolase GN=KGM_03523 OS=Danaus plexippus (Monarch butterfly) PE=4 SV=1	IPR002695: AICARFT/IMPCHase bienzyme; IPR011607: Methylglyoxal synthase-like domain; IPR016193: Cytidine deaminase-like; IPR024050: AICAR transformylase, insert domain; IPR024051: AICAR transformylase domain	PREDICTED: similar to 5-aminoimidazole-4-carboxamide ribonucleotide formyltransferase/IMP cyclohydrolase [Tribolium castaneum] >gi|270002383|gb|EEZ98830.1| hypothetical protein TcasGA2_TC004437 [Tribolium castaneum]	Ixodes scapularis aminoimidazole-4-carboxamide ribonucleotidetransformylase/IMP cyclohydrolase, putative, mRNA
BGIBMGA009983-TA	135	6	0	0	4.49185	Ribosome biogenesis protein BRX1 homolog OS=Drosophila melanogaster GN=CG11583 PE=2 SV=2	Putative brix domain-containing protein 2 GN=KGM_16638 OS=Danaus plexippus (Monarch butterfly) PE=4 SV=1	IPR004154: Anticodon-binding; IPR007109: Brix domain	PREDICTED: similar to brix domain-containing protein 2 [Tribolium castaneum] >gi|270013383|gb|EFA09831.1| hypothetical protein TcasGA2_TC011978 [Tribolium castaneum]	TSA: Striacosta albicosta stalb_01_00000542 mRNA sequence
AK386922|ovS325C06_K00262	153	7	0	0	4.45003	Serine protease inhibitor 3/4 (Fragment) OS=Lonomia obliqua PE=1 SV=1	Serpin-2 OS=Bombyx mori (Silk moth) PE=2 SV=1	IPR000215: Protease inhibitor I4, serpin; IPR023796: Serpin domain	serine protease inhibitor 2 [Bombyx mori] >gi|7341330|gb|AAF61252.1|AF242200_1 serpin-2 [Bombyx mori]	Bombyx mori serine protease inhibitor 2 (serpin-2), mRNA >gi|7341329|gb|AF242200.1|AF242200 Bombyx mori serpin-2 mRNA, complete cds
BGIBMGA012182-TA	215	10	0	0	4.42626	T-complex protein 1 subunit eta OS=Gallus gallus GN=CCT7 PE=1 SV=1	Chaperonin GN=KGM_13429 OS=Danaus plexippus (Monarch butterfly) PE=3 SV=1	IPR002194: Chaperonin TCP-1, conserved site; IPR002423: Chaperonin Cpn60/TCP-1; IPR012720: T-complex protein 1, eta subunit; IPR017998: Chaperone, tailless complex polypeptide 1	chaperonin containing TCP1, subunit 7 [Nasonia vitripennis]	TSA: Spodoptera littoralis CL1Contig99.Spli mRNA sequence
gnl|UG|Bmo#S58880278	150	7	0	0	4.42146	Small nuclear ribonucleoprotein-associated protein B OS=Drosophila melanogaster GN=SmB PE=1 SV=1	Small nuclear ribonucleoprotein polypeptide OS=Bombyx mori (Silk moth) PE=2 SV=1	IPR001163: Like-Sm ribonucleoprotein (LSM) domain; IPR006649: Like-Sm ribonucleoprotein (LSM) domain, eukaryotic/archaea-type; IPR010920: Like-Sm ribonucleoprotein (LSM)-related domain	small nuclear ribonucleoprotein polypeptide [Bombyx mori] >gi|87248407|gb|ABD36256.1| small nuclear ribonucleoprotein polypeptide [Bombyx mori]	Bombyx mori small nuclear ribonucleoprotein polypeptide (LOC778458), mRNA >gi|87248406|gb|DQ311312.1| Bombyx mori small nuclear ribonucleoprotein polypeptide mRNA, complete cds
AK381885|fwgP25F09	150	7	0	0	4.42146	Small nuclear ribonucleoprotein-associated protein B OS=Drosophila melanogaster GN=SmB PE=1 SV=1	Small nuclear ribonucleoprotein polypeptide OS=Bombyx mori (Silk moth) PE=2 SV=1	IPR001163: Like-Sm ribonucleoprotein (LSM) domain; IPR006649: Like-Sm ribonucleoprotein (LSM) domain, eukaryotic/archaea-type; IPR010920: Like-Sm ribonucleoprotein (LSM)-related domain	small nuclear ribonucleoprotein polypeptide [Bombyx mori] >gi|87248407|gb|ABD36256.1| small nuclear ribonucleoprotein polypeptide [Bombyx mori]	Bombyx mori small nuclear ribonucleoprotein polypeptide (LOC778458), mRNA >gi|87248406|gb|DQ311312.1| Bombyx mori small nuclear ribonucleoprotein polypeptide mRNA, complete cds
AK384006|fcaL04A12	212	10	0	0	4.40599	Signal recognition particle receptor subunit beta OS=Homo sapiens GN=SRPRB PE=1 SV=3	Signal recognition particle receptor beta subunit OS=Bombyx mori (Silk moth) PE=2 SV=1	IPR019009: Signal recognition particle receptor, beta subunit; IPR024156: Small GTPase superfamily, ARF type	signal recognition particle receptor beta subunit [Bombyx mori] >gi|111608123|gb|ABH10805.1| signal recognition particle receptor beta subunit [Bombyx mori]	Bombyx mori signal recognition particle receptor beta subunit (LOC778523), mRNA >gi|111608122|gb|DQ646415.1| Bombyx mori signal recognition particle receptor beta subunit mRNA, complete cds
gnl|UG|Bmo#S58876692	212	10	0	0	4.40599	Signal recognition particle receptor subunit beta OS=Homo sapiens GN=SRPRB PE=1 SV=3	Signal recognition particle receptor beta subunit OS=Bombyx mori (Silk moth) PE=2 SV=1	IPR019009: Signal recognition particle receptor, beta subunit; IPR024156: Small GTPase superfamily, ARF type	signal recognition particle receptor beta subunit [Bombyx mori] >gi|111608123|gb|ABH10805.1| signal recognition particle receptor beta subunit [Bombyx mori]	Bombyx mori signal recognition particle receptor beta subunit (LOC778523), mRNA >gi|111608122|gb|DQ646415.1| Bombyx mori signal recognition particle receptor beta subunit mRNA, complete cds
AK383618|MFB-14F17	211	10	0	0	4.39917	Small nuclear ribonucleoprotein-associated protein B OS=Drosophila melanogaster GN=SmB PE=1 SV=1	Small nuclear ribonucleoprotein polypeptide OS=Bombyx mori (Silk moth) PE=2 SV=1	IPR001163: Like-Sm ribonucleoprotein (LSM) domain; IPR006649: Like-Sm ribonucleoprotein (LSM) domain, eukaryotic/archaea-type; IPR010920: Like-Sm ribonucleoprotein (LSM)-related domain	small nuclear ribonucleoprotein polypeptide [Bombyx mori] >gi|87248407|gb|ABD36256.1| small nuclear ribonucleoprotein polypeptide [Bombyx mori]	Bombyx mori small nuclear ribonucleoprotein polypeptide (LOC778458), mRNA >gi|87248406|gb|DQ311312.1| Bombyx mori small nuclear ribonucleoprotein polypeptide mRNA, complete cds
BGIBMGA002462-TA	126	6	0	0	4.39232	Bifunctional purine biosynthesis protein PURH OS=Gallus gallus GN=ATIC PE=1 SV=1	Putative 5-aminoimidazole-4-carboxamide ribonucleotide formyltransferase/IMP cyclohydrolase GN=KGM_03523 OS=Danaus plexippus (Monarch butterfly) PE=4 SV=1	IPR002695: AICARFT/IMPCHase bienzyme; IPR011607: Methylglyoxal synthase-like domain; IPR016193: Cytidine deaminase-like; IPR024050: AICAR transformylase, insert domain; IPR024051: AICAR transformylase domain	PREDICTED: similar to 5-aminoimidazole-4-carboxamide ribonucleotide formyltransferase/IMP cyclohydrolase [Tribolium castaneum] >gi|270002383|gb|EEZ98830.1| hypothetical protein TcasGA2_TC004437 [Tribolium castaneum]	Ixodes scapularis aminoimidazole-4-carboxamide ribonucleotidetransformylase/IMP cyclohydrolase, putative, mRNA
BGIBMGA006841-TA	105	5	0	0	4.39232	A-kinase anchor protein 1, mitochondrial OS=Rattus norvegicus GN=Akap1 PE=2 SV=1	Putative a kinase anchor protein GN=KGM_07598 OS=Danaus plexippus (Monarch butterfly) PE=4 SV=1	IPR002999: Tudor domain; IPR004087: K Homology; IPR004088: K Homology, type 1; IPR008191: Maternal tudor protein; IPR018111: K Homology, type 1, subgroup; IPR018351: Tudor subgroup	PREDICTED: similar to a kinase anchor protein [Tribolium castaneum] >gi|270013437|gb|EFA09885.1| hypothetical protein TcasGA2_TC012034 [Tribolium castaneum]	--
AK383164|fmxg05M04	100	5	0	0	4.32193	Elongation factor Tu, mitochondrial OS=Homo sapiens GN=TUFM PE=1 SV=2	Elongation factor Tu OS=Bombyx mori (Silk moth) PE=2 SV=1	IPR000795: Protein synthesis factor, GTP-binding; IPR004160: Translation elongation factor EFTu/EF1A, C-terminal; IPR004161: Translation elongation factor EFTu/EF1A, domain 2; IPR004541: Translation elongation factor EFTu/EF1A, bacterial/organelle; IPR009000: Translation elongation/initiation factor/Ribosomal, beta-barrel; IPR009001: Translation elongation factor EF1A/initiation factor IF2gamma, …	elongation factor Tu [Bombyx mori] >gi|87248117|gb|ABD36111.1| elongation factor Tu [Bombyx mori]	Bombyx mori elongation factor Tu (LOC692807), mRNA >gi|87248116|gb|DQ311166.1| Bombyx mori elongation factor Tu mRNA, complete cds
gnl|UG|Bmo#S58871232	100	5	0	0	4.32193	Elongation factor Tu, mitochondrial OS=Homo sapiens GN=TUFM PE=1 SV=2	Elongation factor Tu OS=Bombyx mori (Silk moth) PE=2 SV=1	IPR000795: Protein synthesis factor, GTP-binding; IPR004160: Translation elongation factor EFTu/EF1A, C-terminal; IPR004161: Translation elongation factor EFTu/EF1A, domain 2; IPR004541: Translation elongation factor EFTu/EF1A, bacterial/organelle; IPR009000: Translation elongation/initiation factor/Ribosomal, beta-barrel; IPR009001: Translation elongation factor EF1A/initiation factor IF2gamma, …	elongation factor Tu [Bombyx mori] >gi|87248117|gb|ABD36111.1| elongation factor Tu [Bombyx mori]	Bombyx mori elongation factor Tu (LOC692807), mRNA >gi|87248116|gb|DQ311166.1| Bombyx mori elongation factor Tu mRNA, complete cds
gnl|UG|Bmo#S34484955	177	9	0	0	4.29768	Signal recognition particle receptor subunit beta OS=Homo sapiens GN=SRPRB PE=1 SV=3	Signal recognition particle receptor beta subunit OS=Bombyx mori (Silk moth) PE=2 SV=1	IPR019009: Signal recognition particle receptor, beta subunit; IPR024156: Small GTPase superfamily, ARF type	signal recognition particle receptor beta subunit [Bombyx mori] >gi|111608123|gb|ABH10805.1| signal recognition particle receptor beta subunit [Bombyx mori]	Bombyx mori signal recognition particle receptor beta subunit (LOC778523), mRNA >gi|111608122|gb|DQ646415.1| Bombyx mori signal recognition particle receptor beta subunit mRNA, complete cds
BGIBMGA005409-TA	215	11	0	0	4.28876	Signal recognition particle receptor subunit beta OS=Homo sapiens GN=SRPRB PE=1 SV=3	Signal recognition particle receptor beta subunit OS=Bombyx mori (Silk moth) PE=2 SV=1	IPR019009: Signal recognition particle receptor, beta subunit; IPR024156: Small GTPase superfamily, ARF type	signal recognition particle receptor beta subunit [Bombyx mori] >gi|111608123|gb|ABH10805.1| signal recognition particle receptor beta subunit [Bombyx mori]	Bombyx mori signal recognition particle receptor beta subunit (LOC778523), mRNA >gi|111608122|gb|DQ646415.1| Bombyx mori signal recognition particle receptor beta subunit mRNA, complete cds
BGIBMGA003004-TA	192	10	0	0	4.26303	Small nuclear ribonucleoprotein-associated protein B OS=Drosophila melanogaster GN=SmB PE=1 SV=1	Small nuclear ribonucleoprotein polypeptide OS=Bombyx mori (Silk moth) PE=2 SV=1	IPR001163: Like-Sm ribonucleoprotein (LSM) domain; IPR006649: Like-Sm ribonucleoprotein (LSM) domain, eukaryotic/archaea-type; IPR010920: Like-Sm ribonucleoprotein (LSM)-related domain	small nuclear ribonucleoprotein polypeptide [Bombyx mori] >gi|87248407|gb|ABD36256.1| small nuclear ribonucleoprotein polypeptide [Bombyx mori]	Bombyx mori genomic DNA, chromosome 4, BAC clone:041P16, complete sequence
gnl|UG|Dm#S13331012	133	7	0	0	4.24793	--	--	--	--	Drosophila melanogaster chromosome 3R, complete sequence
BGIBMGA009156-TA	152	8	0	0	4.24793	Transketolase-like protein 2 OS=Mus musculus GN=Tktl2 PE=2 SV=1	Transketolase OS=Bombyx mori (Silk moth) PE=2 SV=1	IPR005475: Transketolase-like, pyrimidine-binding domain; IPR005476: Transketolase, C-terminal; IPR009014: Transketolase, C-terminal/Pyruvate-ferredoxin oxidoreductase, domain II; IPR015941: Transketolase-like, C-terminal; IPR020826: Transketolase binding site	transketolase [Bombyx mori] >gi|87248239|gb|ABD36172.1| transketolase [Bombyx mori]	Bombyx mori transketolase (LOC692848), mRNA >gi|87248238|gb|DQ311227.1| Bombyx mori transketolase mRNA, complete cds
AK385240|e10005D18	203	11	0	0	4.2059	T-complex protein 1 subunit eta OS=Gallus gallus GN=CCT7 PE=1 SV=1	Chaperonin GN=KGM_13429 OS=Danaus plexippus (Monarch butterfly) PE=3 SV=1	IPR002194: Chaperonin TCP-1, conserved site; IPR002423: Chaperonin Cpn60/TCP-1; IPR012720: T-complex protein 1, eta subunit; IPR017998: Chaperone, tailless complex polypeptide 1	chaperonin containing TCP1, subunit 7 [Nasonia vitripennis]	TSA: Spodoptera littoralis CL1Contig99.Spli mRNA sequence
gnl|UG|Bmo#S58880727	203	11	0	0	4.2059	T-complex protein 1 subunit eta OS=Gallus gallus GN=CCT7 PE=1 SV=1	Chaperonin GN=KGM_13429 OS=Danaus plexippus (Monarch butterfly) PE=3 SV=1	IPR002194: Chaperonin TCP-1, conserved site; IPR002423: Chaperonin Cpn60/TCP-1; IPR012720: T-complex protein 1, eta subunit; IPR017998: Chaperone, tailless complex polypeptide 1	chaperonin containing TCP1, subunit 7 [Nasonia vitripennis]	TSA: Spodoptera littoralis CL1Contig99.Spli mRNA sequence
AK377634|fe8d11G06_K01334	497	27	0	0	4.20221	Nucleosome assembly protein 1-like 1-A OS=Xenopus laevis GN=nap1l1-a PE=1 SV=1	Nucleosome assembly protein isoform 1 OS=Bombyx mori (Silk moth) PE=2 SV=1	IPR002164: Nucleosome assembly protein (NAP)	nucleosome assembly protein isoform 1 [Bombyx mori] >gi|95102568|gb|ABF51222.1| nucleosome assembly protein isoform 1 [Bombyx mori]	Bombyx mori nucleosome assembly protein (LOC692892), transcript variant 1, mRNA >gi|95102567|gb|DQ443133.1| Bombyx mori nucleosome assembly protein isoform 1 mRNA, complete cds
AK384880|fcaL42D10_K00021	643	35	0	0	4.19939	Calreticulin OS=Bombyx mori GN=crt PE=1 SV=1	Calreticulin GN=CRT OS=Bombyx mori (Silk moth) PE=2 SV=1	IPR001580: Calreticulin/calnexin; IPR008985: Concanavalin A-like lectin/glucanase; IPR009169: Calreticulin; IPR013320: Concanavalin A-like lectin/glucanase, subgroup; IPR018124: Calreticulin/calnexin, conserved site	calreticulin [Bombyx mori] >gi|223951465|gb|ACN29696.1| calreticulin [Bombyx mori]	Bombyx mori calreticulin (Crt), mRNA >gi|31559108|gb|AY297158.1| Bombyx mori calreticulin mRNA, complete cds
AK386321|fprW02M05	641	35	0	0	4.1949	Calreticulin OS=Bombyx mori GN=crt PE=1 SV=1	Calreticulin GN=CRT OS=Bombyx mori (Silk moth) PE=2 SV=1	IPR001580: Calreticulin/calnexin; IPR008985: Concanavalin A-like lectin/glucanase; IPR009169: Calreticulin; IPR013320: Concanavalin A-like lectin/glucanase, subgroup; IPR018124: Calreticulin/calnexin, conserved site	calreticulin [Bombyx mori] >gi|223951465|gb|ACN29696.1| calreticulin [Bombyx mori]	Bombyx mori calreticulin (Crt), mRNA >gi|31559108|gb|AY297158.1| Bombyx mori calreticulin mRNA, complete cds
AK379887|ftes29J13_K00752	506	28	0	0	4.17564	Nucleosome assembly protein 1-like 1-A OS=Xenopus laevis GN=nap1l1-a PE=1 SV=1	Nucleosome assembly protein isoform 1 OS=Bombyx mori (Silk moth) PE=2 SV=1	IPR002164: Nucleosome assembly protein (NAP)	nucleosome assembly protein isoform 1 [Bombyx mori] >gi|95102568|gb|ABF51222.1| nucleosome assembly protein isoform 1 [Bombyx mori]	Bombyx mori nucleosome assembly protein (LOC692892), transcript variant 1, mRNA >gi|95102567|gb|DQ443133.1| Bombyx mori nucleosome assembly protein isoform 1 mRNA, complete cds
AK379116|ftes05E17_K00728	614	34	0	0	4.17463	Calreticulin OS=Bombyx mori GN=crt PE=1 SV=1	Calreticulin GN=CRT OS=Bombyx mori (Silk moth) PE=2 SV=1	IPR001580: Calreticulin/calnexin; IPR008985: Concanavalin A-like lectin/glucanase; IPR009169: Calreticulin; IPR013320: Concanavalin A-like lectin/glucanase, subgroup; IPR018124: Calreticulin/calnexin, conserved site	calreticulin [Bombyx mori] >gi|223951465|gb|ACN29696.1| calreticulin [Bombyx mori]	Bombyx mori calreticulin (CRT) mRNA, complete cds
gnl|UG|Bmo#S58879487	108	6	0	0	4.16993	Inorganic pyrophosphatase OS=Drosophila melanogaster GN=Nurf-38 PE=1 SV=3	Inorganic pyrophosphatase OS=Bombyx mori (Silk moth) PE=4 SV=1	IPR008162: Inorganic pyrophosphatase	inorganic pyrophosphatase [Bombyx mori]	Bombyx mori inorganic pyrophosphatase gene, complete cds
AK383691|MFB-18I18	108	6	0	0	4.16993	Inorganic pyrophosphatase OS=Drosophila melanogaster GN=Nurf-38 PE=1 SV=3	Inorganic pyrophosphatase OS=Bombyx mori (Silk moth) PE=4 SV=1	IPR008162: Inorganic pyrophosphatase	inorganic pyrophosphatase [Bombyx mori]	Bombyx mori inorganic pyrophosphatase gene, complete cds
gnl|UG|Bmo#S31276438	450	25	0	0	4.16993	Nucleosome assembly protein 1-like 1-A OS=Xenopus laevis GN=nap1l1-a PE=1 SV=1	Nucleosome assembly protein OS=Bombyx mori (Silk moth) PE=2 SV=1	IPR002164: Nucleosome assembly protein (NAP)	nucleosome assembly protein isoform 2 [Bombyx mori] >gi|87248371|gb|ABD36238.1| nucleosome assembly protein [Bombyx mori]	Bombyx mori nucleosome assembly protein (LOC692892), transcript variant 2, mRNA >gi|87248370|gb|DQ311294.1| Bombyx mori nucleosome assembly protein mRNA, complete cds
gnl|UG|Bmo#S58872874	178	10	0	0	4.15381	Heterogeneous nuclear ribonucleoprotein 87F OS=Drosophila melanogaster GN=Hrb87F PE=1 SV=2	Heterogeneous nuclear ribonucleoprotein A1 GN=KGM_10934 OS=Danaus plexippus (Monarch butterfly) PE=4 SV=1	IPR000504: RNA recognition motif domain; IPR012677: Nucleotide-binding, alpha-beta plait	PREDICTED: similar to Heterogeneous nuclear ribonucleoprotein at 87F CG12749-PB, isoform B [Apis mellifera]	TSA: Spodoptera littoralis CL348Contig1.Spli mRNA sequence
AK386430|fprW07J24	178	10	0	0	4.15381	Heterogeneous nuclear ribonucleoprotein 87F OS=Drosophila melanogaster GN=Hrb87F PE=1 SV=2	Heterogeneous nuclear ribonucleoprotein A1 GN=KGM_10934 OS=Danaus plexippus (Monarch butterfly) PE=4 SV=1	IPR000504: RNA recognition motif domain; IPR012677: Nucleotide-binding, alpha-beta plait	PREDICTED: similar to Heterogeneous nuclear ribonucleoprotein at 87F CG12749-PB, isoform B [Apis mellifera]	TSA: Spodoptera littoralis CL348Contig1.Spli mRNA sequence
AK383121|fmxg01G11	124	7	0	0	4.14684	--	Putative defensin OS=Bombyx mori (Silk moth) PE=4 SV=1	--	defensin-like protein [Bombyx mori] >gi|71564291|gb|AAZ38358.1| defensin-like protein [Bombyx mori] >gi|189547731|dbj|BAG48202.1| putative defensin [Bombyx mori]	Bombyx mori defensin-like protein (Defensin), mRNA
AK386696|fprW23M18	138	8	0	0	4.10852	Nucleolar protein 58 OS=Vanderwaltozyma polyspora (strain ATCC 22028 / DSM 70294) GN=NOP58 PE=3 SV=1	Putative uncharacterized protein GN=KGM_12278 OS=Danaus plexippus (Monarch butterfly) PE=4 SV=1	--	AGAP011281-PA [Anopheles gambiae str. PEST] >gi|55244692|gb|EAA05227.2| AGAP011281-PA [Anopheles gambiae str. PEST]	--
gnl|UG|Bmo#S58871699	138	8	0	0	4.10852	Nucleolar protein 58 OS=Vanderwaltozyma polyspora (strain ATCC 22028 / DSM 70294) GN=NOP58 PE=3 SV=1	Putative uncharacterized protein GN=KGM_12278 OS=Danaus plexippus (Monarch butterfly) PE=4 SV=1	--	AGAP011281-PA [Anopheles gambiae str. PEST] >gi|55244692|gb|EAA05227.2| AGAP011281-PA [Anopheles gambiae str. PEST]	--
BGIBMGA006405-TA	171	10	0	0	4.09592	Heterogeneous nuclear ribonucleoprotein 87F OS=Drosophila melanogaster GN=Hrb87F PE=1 SV=2	Heterogeneous nuclear ribonucleoprotein A1 GN=KGM_10934 OS=Danaus plexippus (Monarch butterfly) PE=4 SV=1	IPR000504: RNA recognition motif domain; IPR012677: Nucleotide-binding, alpha-beta plait	PREDICTED: similar to Heterogeneous nuclear ribonucleoprotein at 87F CG12749-PB, isoform B [Apis mellifera]	TSA: Spodoptera littoralis CL348Contig1.Spli mRNA sequence
gnl|UG|Dm#S13530404	170	10	0	0	4.08746	Cytochrome c oxidase subunit 1 (Fragment) OS=Drosophila sechellia GN=mt:CoI PE=3 SV=1	Cytochrome c oxidase subunit 1 (Fragment) GN=mt:CoI OS=Drosophila cardini PE=3 SV=1	--	cytochrome oxidase subunit I [Drosophila cardini]	Drosophila melanogaster strain ATCC CRL-1963 cytochrome oxidase subunit 1 (COI) gene, partial cds; mitochondrial
AK378950|fner53A20	102	6	0	0	4.08746	Acidic leucine-rich nuclear phosphoprotein 32 family member A OS=Drosophila melanogaster GN=Anp32a PE=2 SV=1	Putative uncharacterized protein GN=KGM_07434 OS=Danaus plexippus (Monarch butterfly) PE=4 SV=1	IPR001611: Leucine-rich repeat	PREDICTED: similar to mapmodulin-like protein [Tribolium castaneum]	TSA: Striacosta albicosta stalb_01_00010023 mRNA sequence
BGIBMGA006749-TA	102	6	0	0	4.08746	Elongation factor Tu, mitochondrial OS=Homo sapiens GN=TUFM PE=1 SV=2	Elongation factor Tu OS=Bombyx mori (Silk moth) PE=2 SV=1	IPR000795: Protein synthesis factor, GTP-binding; IPR004160: Translation elongation factor EFTu/EF1A, C-terminal; IPR004161: Translation elongation factor EFTu/EF1A, domain 2; IPR004541: Translation elongation factor EFTu/EF1A, bacterial/organelle; IPR009000: Translation elongation/initiation factor/Ribosomal, beta-barrel; IPR009001: Translation elongation factor EF1A/initiation factor IF2gamma, …	elongation factor Tu [Bombyx mori] >gi|87248117|gb|ABD36111.1| elongation factor Tu [Bombyx mori]	Bombyx mori elongation factor Tu (LOC692807), mRNA >gi|87248116|gb|DQ311166.1| Bombyx mori elongation factor Tu mRNA, complete cds
gnl|UG|Bmo#S58876192	102	6	0	0	4.08746	Acidic leucine-rich nuclear phosphoprotein 32 family member A OS=Drosophila melanogaster GN=Anp32a PE=2 SV=1	Putative uncharacterized protein GN=KGM_07434 OS=Danaus plexippus (Monarch butterfly) PE=4 SV=1	IPR001611: Leucine-rich repeat	PREDICTED: similar to mapmodulin-like protein [Tribolium castaneum]	TSA: Striacosta albicosta stalb_01_00010023 mRNA sequence
gnl|UG|Bmo#S55949688	116	7	0	0	4.05063	--	Putative defensin OS=Bombyx mori (Silk moth) PE=4 SV=1	--	defensin-like protein [Bombyx mori] >gi|71564291|gb|AAZ38358.1| defensin-like protein [Bombyx mori] >gi|189547731|dbj|BAG48202.1| putative defensin [Bombyx mori]	Bombyx mori defensin-like protein (Defensin), mRNA
BGIBMGA011168-TA	244	15	0	0	4.02385	Adenosylhomocysteinase OS=Anopheles gambiae GN=Ahcy13 PE=2 SV=2	Adenosylhomocysteinase OS=Bombyx mori (Silk moth) PE=2 SV=1	IPR000043: Adenosylhomocysteinase; IPR015878: S-adenosyl-L-homocysteine hydrolase, NAD binding; IPR020082: S-adenosyl-L-homocysteine hydrolase, conserved site	S-adenosyl-L-homocysteine hydrolase [Bombyx mori] >gi|95102906|gb|ABF51394.1| S-adenosyl-L-homocysteine hydrolase [Bombyx mori]	Bombyx mori S-adenosyl-L-homocysteine hydrolase (LOC100101173), mRNA >gi|95102905|gb|DQ443305.1| Bombyx mori S-adenosyl-L-homocysteine hydrolase mRNA, complete cds
AK386344|fprW03G04	128	8	0	0	4	Ribulose-phosphate 3-epimerase OS=Homo sapiens GN=RPE PE=1 SV=1	Ribulose-phosphate 3-epimerase GN=EAG_01021 OS=Camponotus floridanus (Florida carpenter ant) PE=3 SV=1	IPR000056: Ribulose-phosphate 3-epimerase; IPR011060: Ribulose-phosphate binding barrel; IPR013785: Aldolase-type TIM barrel	Ribulose-phosphate 3-epimerase [Camponotus floridanus]	TSA: Striacosta albicosta stalb_01_00000820 mRNA sequence
gnl|UG|Bmo#S58872960	128	8	0	0	4	Ribulose-phosphate 3-epimerase OS=Homo sapiens GN=RPE PE=1 SV=1	Ribulose-phosphate 3-epimerase GN=EAG_01021 OS=Camponotus floridanus (Florida carpenter ant) PE=3 SV=1	IPR000056: Ribulose-phosphate 3-epimerase; IPR011060: Ribulose-phosphate binding barrel; IPR013785: Aldolase-type TIM barrel	Ribulose-phosphate 3-epimerase [Camponotus floridanus]	TSA: Striacosta albicosta stalb_01_00000820 mRNA sequence
BGIBMGA001708-TA	143	9	0	0	3.98995	Nucleolar protein 58 OS=Pichia guilliermondii GN=NOP58 PE=3 SV=2	Putative uncharacterized protein GN=KGM_12278 OS=Danaus plexippus (Monarch butterfly) PE=4 SV=1	--	AGAP011281-PA [Anopheles gambiae str. PEST] >gi|55244692|gb|EAA05227.2| AGAP011281-PA [Anopheles gambiae str. PEST]	--
gnl|UG|Bmo#S58872630	109	7	0	0	3.96083	Serine/arginine-rich splicing factor 7 OS=Bos taurus GN=SRSF7 PE=2 SV=1	Xl6 OS=Bombyx mori (Silk moth) PE=2 SV=1	IPR000504: RNA recognition motif domain; IPR001878: Zinc finger, CCHC-type; IPR012677: Nucleotide-binding, alpha-beta plait; IPR013084: Zinc finger, CCHC retroviral-type	arginine/serine-rich splicing factor 7 [Bombyx mori] >gi|95103084|gb|ABF51483.1| arginine/serine-rich splicing factor 7 [Bombyx mori] >gi|102269217|gb|ABF55972.2| xl6 [Bombyx mori]	Bombyx mori xl6 mRNA, complete cds
AK386474|fprW08O21	109	7	0	0	3.96083	Serine/arginine-rich splicing factor 7 OS=Bos taurus GN=SRSF7 PE=2 SV=1	Xl6 OS=Bombyx mori (Silk moth) PE=2 SV=1	IPR000504: RNA recognition motif domain; IPR001878: Zinc finger, CCHC-type; IPR012677: Nucleotide-binding, alpha-beta plait; IPR013084: Zinc finger, CCHC retroviral-type	arginine/serine-rich splicing factor 7 [Bombyx mori] >gi|95103084|gb|ABF51483.1| arginine/serine-rich splicing factor 7 [Bombyx mori] >gi|102269217|gb|ABF55972.2| xl6 [Bombyx mori]	Bombyx mori xl6 mRNA, complete cds
gnl|UG|Bmo#S32776801	332	22	0	0	3.91561	Inducible metalloproteinase inhibitor protein OS=Galleria mellonella GN=IMPI PE=1 SV=2	Putative uncharacterized protein GN=KGM_17335 OS=Danaus plexippus (Monarch butterfly) PE=4 SV=1	IPR002919: Protease inhibitor I8, cysteine-rich trypsin inhibitor-like	protease inhibitor 3 [Lonomia obliqua]	--
gnl|UG|Bmo#S55939621	256	17	0	0	3.91254	Basic leucine zipper and W2 domain-containing protein 2 OS=Danio rerio GN=bzw2 PE=2 SV=1	Eukaryotic initiation factor 5C OS=Bombyx mori (Silk moth) PE=2 SV=1	--	eukaryotic initiation factor 5C [Bombyx mori] >gi|116272493|gb|ABJ97182.1| eukaryotic initiation factor 5C [Bombyx mori]	Bombyx mori eukaryotic initiation factor 5C (LOC778502), mRNA >gi|116272492|gb|DQ985592.1| Bombyx mori clone 001_001425_2005-04-13_WD-050413 eukaryotic initiation factor 5C mRNA, complete cds
AK383924|MFB-27G08	268	18	0	0	3.89616	Adenosylhomocysteinase OS=Anopheles gambiae GN=Ahcy13 PE=2 SV=2	Adenosylhomocysteinase OS=Bombyx mori (Silk moth) PE=2 SV=1	IPR000043: Adenosylhomocysteinase; IPR015878: S-adenosyl-L-homocysteine hydrolase, NAD binding; IPR020082: S-adenosyl-L-homocysteine hydrolase, conserved site	S-adenosyl-L-homocysteine hydrolase [Bombyx mori] >gi|95102906|gb|ABF51394.1| S-adenosyl-L-homocysteine hydrolase [Bombyx mori]	Bombyx mori S-adenosyl-L-homocysteine hydrolase (LOC100101173), mRNA >gi|95102905|gb|DQ443305.1| Bombyx mori S-adenosyl-L-homocysteine hydrolase mRNA, complete cds
gnl|UG|Bmo#S55952346	163	11	0	0	3.8893	Putative protein TPRXL OS=Homo sapiens GN=TPRXL PE=5 SV=2	Putative uncharacterized protein GN=KGM_16893 OS=Danaus plexippus (Monarch butterfly) PE=4 SV=1	--	hypothetical protein EAG_07461 [Camponotus floridanus]	TSA: Striacosta albicosta stalb_01_00002313 mRNA sequence
gnl|UG|Bmo#S33855256	102	7	0	0	3.86507	Serine-arginine protein 55 OS=Drosophila melanogaster GN=B52 PE=1 SV=4	Splicing factor arginine/serine-rich 6 GN=SFRS6 OS=Bombyx mori (Silk moth) PE=2 SV=1	IPR000504: RNA recognition motif domain; IPR012677: Nucleotide-binding, alpha-beta plait	splicing factor arginine/serine-rich 6 [Bombyx mori] >gi|109706819|gb|ABG42996.1| splicing factor arginine/serine-rich 6 [Bombyx mori]	Bombyx mori splicing factor arginine/serine-rich 6 (Sfrs6), mRNA >gi|109706818|gb|DQ648521.1| Bombyx mori splicing factor arginine/serine-rich 6 (SFRS6) mRNA, complete cds
AK385057|fcaL49G10_K01572	261	18	0	0	3.85798	Adenosylhomocysteinase OS=Anopheles gambiae GN=Ahcy13 PE=2 SV=2	Adenosylhomocysteinase OS=Bombyx mori (Silk moth) PE=2 SV=1	IPR000043: Adenosylhomocysteinase; IPR015878: S-adenosyl-L-homocysteine hydrolase, NAD binding; IPR020082: S-adenosyl-L-homocysteine hydrolase, conserved site	S-adenosyl-L-homocysteine hydrolase [Bombyx mori] >gi|95102906|gb|ABF51394.1| S-adenosyl-L-homocysteine hydrolase [Bombyx mori]	Bombyx mori S-adenosyl-L-homocysteine hydrolase (LOC100101173), mRNA >gi|95102905|gb|DQ443305.1| Bombyx mori S-adenosyl-L-homocysteine hydrolase mRNA, complete cds
gnl|UG|Bmo#S58875688	257	18	0	0	3.8357	Adenosylhomocysteinase OS=Anopheles gambiae GN=Ahcy13 PE=2 SV=2	Adenosylhomocysteinase OS=Bombyx mori (Silk moth) PE=2 SV=1	IPR000043: Adenosylhomocysteinase; IPR015878: S-adenosyl-L-homocysteine hydrolase, NAD binding; IPR020082: S-adenosyl-L-homocysteine hydrolase, conserved site	S-adenosyl-L-homocysteine hydrolase [Bombyx mori] >gi|95102906|gb|ABF51394.1| S-adenosyl-L-homocysteine hydrolase [Bombyx mori]	Bombyx mori S-adenosyl-L-homocysteine hydrolase (LOC100101173), mRNA >gi|95102905|gb|DQ443305.1| Bombyx mori S-adenosyl-L-homocysteine hydrolase mRNA, complete cds
AK381017|fufe26M21	257	18	0	0	3.8357	Adenosylhomocysteinase OS=Anopheles gambiae GN=Ahcy13 PE=2 SV=2	Adenosylhomocysteinase OS=Bombyx mori (Silk moth) PE=2 SV=1	IPR000043: Adenosylhomocysteinase; IPR015878: S-adenosyl-L-homocysteine hydrolase, NAD binding; IPR020082: S-adenosyl-L-homocysteine hydrolase, conserved site	S-adenosyl-L-homocysteine hydrolase [Bombyx mori] >gi|95102906|gb|ABF51394.1| S-adenosyl-L-homocysteine hydrolase [Bombyx mori]	Bombyx mori S-adenosyl-L-homocysteine hydrolase (LOC100101173), mRNA >gi|95102905|gb|DQ443305.1| Bombyx mori S-adenosyl-L-homocysteine hydrolase mRNA, complete cds
BGIBMGA004164-TA	326	23	0	0	3.82517	Transcription factor jun-D OS=Gallus gallus GN=JUND PE=3 SV=1	Transcription factor AP-1 GN=EAG_07840 OS=Camponotus floridanus (Florida carpenter ant) PE=4 SV=1	IPR002112: Transcription factor Jun; IPR004827: Basic-leucine zipper (bZIP) transcription factor; IPR005643: Jun-like transcription factor; IPR008917: Eukaryotic transcription factor, Skn-1-like, DNA-binding; IPR011616: bZIP transcription factor, bZIP-1	Transcription factor AP-1 [Camponotus floridanus]	TSA: Spodoptera littoralis CL114Contig1.Spli mRNA sequence
gnl|UG|Bmo#S50146422	126	9	0	0	3.80735	Coiled-coil domain-containing protein 72 homolog OS=Drosophila melanogaster GN=CG13364 PE=4 SV=1	Coiled-coil domain-containing protein 72 GN=KGM_01526 OS=Danaus plexippus (Monarch butterfly) PE=4 SV=1	IPR015157: Translation machinery associated TMA7	PREDICTED: hypothetical protein [Tribolium castaneum] >gi|270010016|gb|EFA06464.1| hypothetical protein TcasGA2_TC009348 [Tribolium castaneum]	Drosophila grimshawi GH12614 (Dgri\GH12614), mRNA
AK386318|fprW02J10	582	42	0	0	3.79256	High mobility group protein D OS=Drosophila melanogaster GN=HmgD PE=1 SV=1	Mobility group protein 1B GN=KGM_13852 OS=Danaus plexippus (Monarch butterfly) PE=4 SV=1	IPR000910: High mobility group, HMG1/HMG2; IPR009071: High mobility group, superfamily	mobility group protein 1B [Bombyx mori] >gi|95102634|gb|ABF51255.1| mobility group protein 1B [Bombyx mori]	Bombyx mori mobility group protein 1B (LOC100101161), mRNA >gi|95102633|gb|DQ443166.1| Bombyx mori mobility group protein 1B mRNA, complete cds
gnl|UG|Bmo#S58872986	582	42	0	0	3.79256	High mobility group protein D OS=Drosophila melanogaster GN=HmgD PE=1 SV=1	Mobility group protein 1B GN=KGM_13852 OS=Danaus plexippus (Monarch butterfly) PE=4 SV=1	IPR000910: High mobility group, HMG1/HMG2; IPR009071: High mobility group, superfamily	mobility group protein 1B [Bombyx mori] >gi|95102634|gb|ABF51255.1| mobility group protein 1B [Bombyx mori]	Bombyx mori mobility group protein 1B (LOC100101161), mRNA >gi|95102633|gb|DQ443166.1| Bombyx mori mobility group protein 1B mRNA, complete cds
BGIBMGA007822-TA	138	10	0	0	3.7866	Heterogeneous nuclear ribonucleoprotein A1, A2/B1 homolog OS=Schistocerca americana GN=HNRNP PE=2 SV=1	Heterogeneous nuclear ribonucleoprotein A1 OS=Bombyx mori (Silk moth) PE=2 SV=1	IPR000504: RNA recognition motif domain; IPR012677: Nucleotide-binding, alpha-beta plait	heterogeneous nuclear ribonucleoprotein A1 [Bombyx mori] >gi|95102934|gb|ABF51408.1| heterogeneous nuclear ribonucleoprotein A1 [Bombyx mori]	Bombyx mori heterogeneous nuclear ribonucleoprotein A1 (LOC100101226), mRNA >gi|95102933|gb|DQ443319.1| Bombyx mori heterogeneous nuclear ribonucleoprotein A1 mRNA, complete cds
gnl|UG|Bmo#S50146941	300	22	0	0	3.76939	Transcription factor jun-D OS=Gallus gallus GN=JUND PE=3 SV=1	Transcription factor AP-1 GN=G5I_02473 OS=Acromyrmex echinatior (Panamanian leafcutter ant) PE=4 SV=1	IPR002112: Transcription factor Jun; IPR004827: Basic-leucine zipper (bZIP) transcription factor; IPR005643: Jun-like transcription factor; IPR008917: Eukaryotic transcription factor, Skn-1-like, DNA-binding; IPR011616: bZIP transcription factor, bZIP-1	Transcription factor AP-1 [Harpegnathos saltator]	TSA: Spodoptera littoralis CL114Contig1.Spli mRNA sequence
AK382759|fdpe26O18	109	8	0	0	3.76818	Heterogeneous nuclear ribonucleoprotein A1, A2/B1 homolog OS=Schistocerca americana GN=HNRNP PE=2 SV=1	Heterogeneous nuclear ribonucleoprotein A1 OS=Bombyx mori (Silk moth) PE=2 SV=1	IPR000504: RNA recognition motif domain; IPR012677: Nucleotide-binding, alpha-beta plait	heterogeneous nuclear ribonucleoprotein A1 [Bombyx mori] >gi|95102934|gb|ABF51408.1| heterogeneous nuclear ribonucleoprotein A1 [Bombyx mori]	Bombyx mori heterogeneous nuclear ribonucleoprotein A1 (LOC100101226), mRNA >gi|95102933|gb|DQ443319.1| Bombyx mori heterogeneous nuclear ribonucleoprotein A1 mRNA, complete cds
gnl|UG|Bmo#S58873580	109	8	0	0	3.76818	Heterogeneous nuclear ribonucleoprotein A1, A2/B1 homolog OS=Schistocerca americana GN=HNRNP PE=2 SV=1	Heterogeneous nuclear ribonucleoprotein A1 OS=Bombyx mori (Silk moth) PE=2 SV=1	IPR000504: RNA recognition motif domain; IPR012677: Nucleotide-binding, alpha-beta plait	heterogeneous nuclear ribonucleoprotein A1 [Bombyx mori] >gi|95102934|gb|ABF51408.1| heterogeneous nuclear ribonucleoprotein A1 [Bombyx mori]	Bombyx mori heterogeneous nuclear ribonucleoprotein A1 (LOC100101226), mRNA >gi|95102933|gb|DQ443319.1| Bombyx mori heterogeneous nuclear ribonucleoprotein A1 mRNA, complete cds
gnl|UG|Bmo#S58871328	503	37	0	0	3.76496	Small ubiquitin-related modifier 3 OS=Xenopus tropicalis GN=sumo3 PE=3 SV=1	Ubiquitin-like protein SMT3 GN=Smt3 OS=Bombyx mori (Silk moth) PE=4 SV=1	IPR000626: Ubiquitin; IPR019955: Ubiquitin supergroup; IPR022617: Small ubiquitin-related modifier, SUMO	ubiquitin-like protein SMT3 [Bombyx mori] >gi|77799098|gb|ABB03695.1| small ubiquitin-like modifier protein [Bombyx mori] >gi|77862436|gb|ABB04499.1| SUMO [Bombyx mori] >gi|87248605|gb|ABD36355.1| ubiquitin-like protein SMT3 [Bombyx mori]	Bombyx mori ubiquitin-like protein SMT3 mRNA, complete cds
AK383464|MFB-07L16	503	37	0	0	3.76496	Small ubiquitin-related modifier 3 OS=Xenopus tropicalis GN=sumo3 PE=3 SV=1	Ubiquitin-like protein SMT3 GN=Smt3 OS=Bombyx mori (Silk moth) PE=4 SV=1	IPR000626: Ubiquitin; IPR019955: Ubiquitin supergroup; IPR022617: Small ubiquitin-related modifier, SUMO	ubiquitin-like protein SMT3 [Bombyx mori] >gi|77799098|gb|ABB03695.1| small ubiquitin-like modifier protein [Bombyx mori] >gi|77862436|gb|ABB04499.1| SUMO [Bombyx mori] >gi|87248605|gb|ABD36355.1| ubiquitin-like protein SMT3 [Bombyx mori]	Bombyx mori ubiquitin-like protein SMT3 mRNA, complete cds
BGIBMGA002461-TA	118	9	0	0	3.71272	Ribulose-phosphate 3-epimerase OS=Homo sapiens GN=RPE PE=1 SV=1	Ribulose-phosphate 3-epimerase GN=EAG_01021 OS=Camponotus floridanus (Florida carpenter ant) PE=3 SV=1	IPR000056: Ribulose-phosphate 3-epimerase; IPR011060: Ribulose-phosphate binding barrel; IPR013785: Aldolase-type TIM barrel	Ribulose-phosphate 3-epimerase [Camponotus floridanus]	TSA: Striacosta albicosta stalb_01_00000820 mRNA sequence
gnl|UG|Bmo#S46645643	528	41	0	0	3.68684	Tubulin beta-1 chain OS=Manduca sexta PE=2 SV=1	Beta-tubulin OS=Agrotis ipsilon (Black cutworm moth) PE=2 SV=1	IPR000217: Tubulin; IPR002453: Beta tubulin; IPR003008: Tubulin/FtsZ, GTPase domain; IPR017975: Tubulin, conserved site	tubulin beta-1 [Acyrthosiphon pisum] >gi|297242130|gb|ADI24738.1| tubulin beta-1 chain [Acyrthosiphon pisum]	Bombyx mori beta-tubulin (Tub2), mRNA >gi|19773427|dbj|AB072308.1| Bombyx mori bmtub2 mRNA for beta-tubulin, complete cds
gnl|UG|Bmo#S58880093	103	8	0	0	3.6865	Succinyl-CoA ligase [GDP-forming] subunit beta, mitochondrial OS=Homo sapiens GN=SUCLG2 PE=1 SV=2	Succinyl-coa synthetase beta chain GN=KGM_18935 OS=Danaus plexippus (Monarch butterfly) PE=4 SV=1	IPR005809: Succinyl-CoA synthetase, beta subunit; IPR005811: ATP-citrate lyase/succinyl-CoA ligase; IPR013650: ATP-grasp fold, succinyl-CoA synthetase-type; IPR013815: ATP-grasp fold, subdomain 1; IPR013816: ATP-grasp fold, subdomain 2; IPR016102: Succinyl-CoA synthetase-like; IPR017866: Succinyl-CoA synthetase, beta subunit, conserved site	succinyl-coa synthetase beta chain [Aedes aegypti] >gi|157110384|ref|XP_001651079.1| succinyl-coa synthetase beta chain [Aedes aegypti] >gi|108878749|gb|EAT42974.1| succinyl-coa synthetase beta chain [Aedes aegypti] >gi|108878750|gb|EAT42975.1| succinyl-coa synthetase beta chain [Aedes aegypti]	TSA: Striacosta albicosta stalb_01_00000215 mRNA sequence
AK385428|e10014H01	103	8	0	0	3.6865	Succinyl-CoA ligase [GDP-forming] subunit beta, mitochondrial OS=Homo sapiens GN=SUCLG2 PE=1 SV=2	Succinyl-coa synthetase beta chain GN=KGM_18935 OS=Danaus plexippus (Monarch butterfly) PE=4 SV=1	IPR005809: Succinyl-CoA synthetase, beta subunit; IPR005811: ATP-citrate lyase/succinyl-CoA ligase; IPR013650: ATP-grasp fold, succinyl-CoA synthetase-type; IPR013815: ATP-grasp fold, subdomain 1; IPR013816: ATP-grasp fold, subdomain 2; IPR016102: Succinyl-CoA synthetase-like; IPR017866: Succinyl-CoA synthetase, beta subunit, conserved site	succinyl-coa synthetase beta chain [Aedes aegypti] >gi|157110384|ref|XP_001651079.1| succinyl-coa synthetase beta chain [Aedes aegypti] >gi|108878749|gb|EAT42974.1| succinyl-coa synthetase beta chain [Aedes aegypti] >gi|108878750|gb|EAT42975.1| succinyl-coa synthetase beta chain [Aedes aegypti]	TSA: Striacosta albicosta stalb_01_00000215 mRNA sequence
BGIBMGA012472-TA	141	11	0	0	3.68012	Acidic leucine-rich nuclear phosphoprotein 32 family member A OS=Drosophila melanogaster GN=Anp32a PE=2 SV=1	Putative uncharacterized protein GN=KGM_07434 OS=Danaus plexippus (Monarch butterfly) PE=4 SV=1	IPR001611: Leucine-rich repeat	GE13954 [Drosophila yakuba] >gi|194178109|gb|EDW91720.1| GE13954 [Drosophila yakuba]	TSA: Striacosta albicosta stalb_01_00010023 mRNA sequence
BGIBMGA010464-TA	115	9	0	0	3.67557	Putative protein TPRXL OS=Homo sapiens GN=TPRXL PE=5 SV=2	Putative uncharacterized protein GN=KGM_16893 OS=Danaus plexippus (Monarch butterfly) PE=4 SV=1	--	PREDICTED: hypothetical protein [Tribolium castaneum] >gi|270005618|gb|EFA02066.1| hypothetical protein TcasGA2_TC007699 [Tribolium castaneum]	TSA: Striacosta albicosta stalb_01_00002313 mRNA sequence
AK383036|fepM21O03	127	10	0	0	3.66676	T-complex protein 1 subunit zeta OS=Mus musculus GN=Cct6a PE=1 SV=3	Chaperonin subunit 6a zeta OS=Bombyx mori (Silk moth) PE=2 SV=1	IPR002194: Chaperonin TCP-1, conserved site; IPR002423: Chaperonin Cpn60/TCP-1; IPR012722: T-complex protein 1, zeta subunit; IPR017998: Chaperone, tailless complex polypeptide 1	chaperonin subunit 6a zeta [Bombyx mori] >gi|87248083|gb|ABD36094.1| chaperonin subunit 6a zeta [Bombyx mori]	Bombyx mori chaperonin subunit 6a zeta (LOC692796), mRNA >gi|87248082|gb|DQ311149.1| Bombyx mori chaperonin subunit 6a zeta mRNA, complete cds
AK386493|fprW09N15	101	8	0	0	3.65821	Peptidyl-prolyl cis-trans isomerase FKBP1A OS=Bos taurus GN=FKBP1A PE=1 SV=2	Peptidyl-prolyl cis-trans isomerase OS=Bombyx mori (Silk moth) PE=4 SV=1	IPR001179: Peptidyl-prolyl cis-trans isomerase, FKBP-type, domain; IPR023566: Peptidyl-prolyl cis-trans isomerase, FKBP-type	FK506-binding protein [Bombyx mori] >gi|95102696|gb|ABF51286.1| FK506-binding protein [Bombyx mori]	Bombyx mori FK506-binding protein (Fkbp12), mRNA >gi|95102695|gb|DQ443197.1| Bombyx mori FK506-binding protein mRNA, complete cds
gnl|UG|Bmo#S58872611	101	8	0	0	3.65821	Peptidyl-prolyl cis-trans isomerase FKBP1A OS=Bos taurus GN=FKBP1A PE=1 SV=2	Peptidyl-prolyl cis-trans isomerase OS=Bombyx mori (Silk moth) PE=4 SV=1	IPR001179: Peptidyl-prolyl cis-trans isomerase, FKBP-type, domain; IPR023566: Peptidyl-prolyl cis-trans isomerase, FKBP-type	FK506-binding protein [Bombyx mori] >gi|95102696|gb|ABF51286.1| FK506-binding protein [Bombyx mori]	Bombyx mori FK506-binding protein (Fkbp12), mRNA >gi|95102695|gb|DQ443197.1| Bombyx mori FK506-binding protein mRNA, complete cds
AK385667|fphe02K05	225	18	0	0	3.64386	Glutathione S-transferase 1-1 OS=Lucilia cuprina GN=GST1 PE=1 SV=2	Glutathione S-transferase delta OS=Bombyx mori (Silk moth) PE=2 SV=1	IPR004045: Glutathione S-transferase, N-terminal; IPR004046: Glutathione S-transferase, C-terminal; IPR010987: Glutathione S-transferase, C-terminal-like; IPR012336: Thioredoxin-like fold; IPR017933: Glutathione S-transferase/chloride channel, C-terminal	glutathione S-transferase delta 2 [Bombyx mori] >gi|54013453|dbj|BAD60789.1| glutathione S-transferase delta [Bombyx mori]	Bombyx mori glutathione S-transferase delta 2 (GSTd2), mRNA >gi|311141828|dbj|AB176691.2| Bombyx mori GST delta mRNA for glutathione S-transferase delta, complete cds
gnl|UG|Bmo#S58876599	225	18	0	0	3.64386	Glutathione S-transferase 1-1 OS=Lucilia cuprina GN=GST1 PE=1 SV=2	Glutathione S-transferase delta OS=Bombyx mori (Silk moth) PE=2 SV=1	IPR004045: Glutathione S-transferase, N-terminal; IPR004046: Glutathione S-transferase, C-terminal; IPR010987: Glutathione S-transferase, C-terminal-like; IPR012336: Thioredoxin-like fold; IPR017933: Glutathione S-transferase/chloride channel, C-terminal	glutathione S-transferase delta 2 [Bombyx mori] >gi|54013453|dbj|BAD60789.1| glutathione S-transferase delta [Bombyx mori]	Bombyx mori glutathione S-transferase delta 2 (GSTd2), mRNA >gi|311141828|dbj|AB176691.2| Bombyx mori GST delta mRNA for glutathione S-transferase delta, complete cds
gnl|UG|Bmo#S18420295	374	30	0	0	3.64	Tubulin beta-1 chain OS=Manduca sexta PE=2 SV=1	Beta-tubulin OS=Agrotis ipsilon (Black cutworm moth) PE=2 SV=1	IPR000217: Tubulin; IPR003008: Tubulin/FtsZ, GTPase domain; IPR004057: Epsilon tubulin	tubulin beta-1 [Acyrthosiphon pisum] >gi|297242130|gb|ADI24738.1| tubulin beta-1 chain [Acyrthosiphon pisum]	Bombyx mori beta-tubulin (Tub2), mRNA >gi|19773427|dbj|AB072308.1| Bombyx mori bmtub2 mRNA for beta-tubulin, complete cds
AK377993|ffbm22D17	273	22	0	0	3.63333	Calreticulin OS=Bombyx mori GN=crt PE=1 SV=1	Calreticulin GN=CRT OS=Bombyx mori (Silk moth) PE=2 SV=1	IPR001580: Calreticulin/calnexin; IPR008985: Concanavalin A-like lectin/glucanase; IPR009169: Calreticulin; IPR013320: Concanavalin A-like lectin/glucanase, subgroup; IPR018124: Calreticulin/calnexin, conserved site	calreticulin [Bombyx mori] >gi|223951465|gb|ACN29696.1| calreticulin [Bombyx mori]	Bombyx mori calreticulin (CRT) mRNA, complete cds
gnl|UG|Bmo#S58878517	273	22	0	0	3.63333	Calreticulin OS=Bombyx mori GN=crt PE=1 SV=1	Calreticulin GN=CRT OS=Bombyx mori (Silk moth) PE=2 SV=1	IPR001580: Calreticulin/calnexin; IPR008985: Concanavalin A-like lectin/glucanase; IPR009169: Calreticulin; IPR013320: Concanavalin A-like lectin/glucanase, subgroup; IPR018124: Calreticulin/calnexin, conserved site	calreticulin [Bombyx mori] >gi|223951465|gb|ACN29696.1| calreticulin [Bombyx mori]	Bombyx mori calreticulin (CRT) mRNA, complete cds
gnl|UG|Bmo#S31276582	111	9	0	0	3.62449	T-complex protein 1 subunit zeta OS=Mus musculus GN=Cct6a PE=1 SV=3	Chaperonin subunit 6a zeta OS=Bombyx mori (Silk moth) PE=2 SV=1	IPR002194: Chaperonin TCP-1, conserved site; IPR002423: Chaperonin Cpn60/TCP-1; IPR012722: T-complex protein 1, zeta subunit; IPR017998: Chaperone, tailless complex polypeptide 1	chaperonin subunit 6a zeta [Bombyx mori] >gi|87248083|gb|ABD36094.1| chaperonin subunit 6a zeta [Bombyx mori]	Bombyx mori chaperonin subunit 6a zeta (LOC692796), mRNA >gi|87248082|gb|DQ311149.1| Bombyx mori chaperonin subunit 6a zeta mRNA, complete cds
BGIBMGA007988-TA	110	9	0	0	3.61143	Inorganic pyrophosphatase OS=Drosophila melanogaster GN=Nurf-38 PE=1 SV=3	Inorganic pyrophosphatase OS=Bombyx mori (Silk moth) PE=4 SV=1	IPR008162: Inorganic pyrophosphatase	inorganic pyrophosphatase [Bombyx mori]	Bombyx mori inorganic pyrophosphatase gene, complete cds
BGIBMGA007950-TA	538	45	0	0	3.57961	Heat shock 70 kDa protein cognate 3 OS=Drosophila melanogaster GN=Hsc70-3 PE=2 SV=2	Heat shock protein 70-3 OS=Bombyx mori (Silk moth) PE=2 SV=1	IPR001023: Heat shock protein Hsp70; IPR013126: Heat shock protein 70; IPR018181: Heat shock protein 70, conserved site	heat shock 70 kD protein cognate [Bombyx mori] >gi|3426021|dbj|BAA32395.1| heat shock 70 kD protein cognate [Bombyx mori] >gi|219810306|gb|ACL36369.1| heat shock protein 70 [Bombyx mori] >gi|219810308|gb|ACL36370.1| heat shock protein 70 [Bombyx mori]	Bombyx mori heat shock protein 70 mRNA, complete cds
BGIBMGA011581-TA	215	18	0	0	3.57827	Small ubiquitin-related modifier 3 OS=Xenopus tropicalis GN=sumo3 PE=3 SV=1	Ubiquitin-like protein SMT3 GN=Smt3 OS=Bombyx mori (Silk moth) PE=4 SV=1	IPR000626: Ubiquitin; IPR019955: Ubiquitin supergroup; IPR022617: Small ubiquitin-related modifier, SUMO	ubiquitin-like protein SMT3 [Bombyx mori] >gi|77799098|gb|ABB03695.1| small ubiquitin-like modifier protein [Bombyx mori] >gi|77862436|gb|ABB04499.1| SUMO [Bombyx mori] >gi|87248605|gb|ABD36355.1| ubiquitin-like protein SMT3 [Bombyx mori]	Bombyx mori ubiquitin-like protein SMT3 mRNA, complete cds
gnl|UG|Bmo#S18421946	167	14	0	0	3.57635	Histone H4 OS=Xenopus tropicalis GN=TGas006m08.1 PE=3 SV=1	Histone H4 GN=CAOG_02343 OS=Capsaspora owczarzaki (strain ATCC 30864) PE=3 SV=1	--	histone H4 [Capsaspora owczarzaki ATCC 30864]	Bombyx mori histone H4-like protein (H4-l), mRNA >gi|223972585|dbj|AB485604.1| Bombyx mori H4-L mRNA for histone H4-like protein, complete cds
AK384152|fcaL09J24_K01525	286	24	0	0	3.57491	Glutathione S-transferase 1-1 OS=Lucilia cuprina GN=GST1 PE=1 SV=2	Glutathione S-transferase delta OS=Bombyx mori (Silk moth) PE=2 SV=1	IPR004045: Glutathione S-transferase, N-terminal; IPR004046: Glutathione S-transferase, C-terminal; IPR010987: Glutathione S-transferase, C-terminal-like; IPR012336: Thioredoxin-like fold; IPR017933: Glutathione S-transferase/chloride channel, C-terminal	glutathione S-transferase delta 2 [Bombyx mori] >gi|54013453|dbj|BAD60789.1| glutathione S-transferase delta [Bombyx mori]	Bombyx mori glutathione S-transferase delta 2 (GSTd2), mRNA >gi|311141828|dbj|AB176691.2| Bombyx mori GST delta mRNA for glutathione S-transferase delta, complete cds
BGIBMGA014190-TA	189	16	0	0	3.56224	Myrosinase 1 OS=Brevicoryne brassicae PE=1 SV=1	Seminal fluid protein CSSFP031 OS=Chilo suppressalis (striped riceborer) PE=2 SV=1	IPR001360: Glycoside hydrolase, family 1; IPR013781: Glycoside hydrolase, subgroup, catalytic domain; IPR017853: Glycoside hydrolase, superfamily; IPR018120: Glycoside hydrolase, family 1, active site	beta-glucosidase [Nasutitermes takasagoensis]	--
BGIBMGA005289-TA	565	48	0	0	3.55714	High mobility group protein D OS=Drosophila melanogaster GN=HmgD PE=1 SV=1	Mobility group protein 1B OS=Bombyx mori (Silk moth) PE=4 SV=1	IPR000910: High mobility group, HMG1/HMG2; IPR009071: High mobility group, superfamily	mobility group protein 1B [Bombyx mori] >gi|95102634|gb|ABF51255.1| mobility group protein 1B [Bombyx mori]	Bombyx mori mobility group protein 1B (LOC100101161), mRNA >gi|95102633|gb|DQ443166.1| Bombyx mori mobility group protein 1B mRNA, complete cds
BGIBMGA014144-TA	327	28	0	0	3.54579	Myrosinase 1 OS=Brevicoryne brassicae PE=1 SV=1	Seminal fluid protein CSSFP031 OS=Chilo suppressalis (striped riceborer) PE=2 SV=1	IPR001360: Glycoside hydrolase, family 1; IPR013781: Glycoside hydrolase, subgroup, catalytic domain; IPR017853: Glycoside hydrolase, superfamily; IPR018120: Glycoside hydrolase, family 1, active site	glycoside hydrolase [Culex quinquefasciatus] >gi|167868490|gb|EDS31873.1| glycoside hydrolase [Culex quinquefasciatus]	--
BGIBMGA002222-TA	231	20	0	0	3.52982	Glutathione S-transferase 1-1 OS=Lucilia cuprina GN=GST1 PE=1 SV=2	Glutathione S-transferase delta OS=Bombyx mori (Silk moth) PE=2 SV=1	IPR004045: Glutathione S-transferase, N-terminal; IPR004046: Glutathione S-transferase, C-terminal; IPR010987: Glutathione S-transferase, C-terminal-like; IPR012336: Thioredoxin-like fold; IPR017933: Glutathione S-transferase/chloride channel, C-terminal	glutathione S-transferase delta 2 [Bombyx mori] >gi|54013453|dbj|BAD60789.1| glutathione S-transferase delta [Bombyx mori]	Bombyx mori glutathione S-transferase delta 2 (GSTd2), mRNA >gi|311141828|dbj|AB176691.2| Bombyx mori GST delta mRNA for glutathione S-transferase delta, complete cds
gnl|UG|Bmo#S58881098	530	46	0	0	3.52629	Heat shock 70 kDa protein cognate 3 OS=Drosophila melanogaster GN=Hsc70-3 PE=2 SV=2	Heat shock protein 70-3 OS=Bombyx mori (Silk moth) PE=2 SV=1	IPR001023: Heat shock protein Hsp70; IPR013126: Heat shock protein 70; IPR018181: Heat shock protein 70, conserved site	heat shock 70 kD protein cognate [Bombyx mori] >gi|3426021|dbj|BAA32395.1| heat shock 70 kD protein cognate [Bombyx mori] >gi|219810306|gb|ACL36369.1| heat shock protein 70 [Bombyx mori] >gi|219810308|gb|ACL36370.1| heat shock protein 70 [Bombyx mori]	Bombyx mori heat shock protein 70 mRNA, complete cds
AK383661|MFB-16D04	530	46	0	0	3.52629	Heat shock 70 kDa protein cognate 3 OS=Drosophila melanogaster GN=Hsc70-3 PE=2 SV=2	Heat shock protein 70-3 OS=Bombyx mori (Silk moth) PE=2 SV=1	IPR001023: Heat shock protein Hsp70; IPR013126: Heat shock protein 70; IPR018181: Heat shock protein 70, conserved site	heat shock 70 kD protein cognate [Bombyx mori] >gi|3426021|dbj|BAA32395.1| heat shock 70 kD protein cognate [Bombyx mori] >gi|219810306|gb|ACL36369.1| heat shock protein 70 [Bombyx mori] >gi|219810308|gb|ACL36370.1| heat shock protein 70 [Bombyx mori]	Bombyx mori heat shock protein 70 mRNA, complete cds
BGIBMGA010845-TA	115	10	0	0	3.52356	Protein BCCIP homolog OS=Drosophila melanogaster GN=CG9286 PE=1 SV=2	Putative uncharacterized protein GN=KGM_16808 OS=Danaus plexippus (Monarch butterfly) PE=4 SV=1	--	Protein BCCIP-like protein [Harpegnathos saltator]	TSA: Striacosta albicosta stalb_01_00009440 mRNA sequence
AK386917|ovS025H03_K00709	240	21	0	0	3.51457	Protein BCCIP homolog OS=Drosophila melanogaster GN=CG9286 PE=1 SV=2	Putative uncharacterized protein GN=KGM_16808 OS=Danaus plexippus (Monarch butterfly) PE=4 SV=1	--	Protein BCCIP-like protein [Harpegnathos saltator]	TSA: Striacosta albicosta stalb_01_00009440 mRNA sequence
AK377425|fwd-23C23	411	36	0	0	3.51307	Tubulin beta-1 chain OS=Manduca sexta PE=2 SV=1	Beta-tubulin GN=bmtub2 OS=Bombyx mori (Silk moth) PE=2 SV=1	IPR000217: Tubulin; IPR002453: Beta tubulin; IPR003008: Tubulin/FtsZ, GTPase domain; IPR008280: Tubulin/FtsZ, C-terminal; IPR017975: Tubulin, conserved site; IPR023123: Tubulin, C-terminal	RecName: Full=Tubulin beta-1 chain; AltName: Full=Beta-1-tubulin >gi|2613141|gb|AAB84297.1| beta-1 tubulin [Manduca sexta]	Bombyx mori beta-tubulin (Tub2), mRNA >gi|19773427|dbj|AB072308.1| Bombyx mori bmtub2 mRNA for beta-tubulin, complete cds
gnl|UG|Bmo#S58876790	239	21	0	0	3.50855	Protein BCCIP homolog OS=Drosophila melanogaster GN=CG9286 PE=1 SV=2	Putative uncharacterized protein GN=KGM_16808 OS=Danaus plexippus (Monarch butterfly) PE=4 SV=1	--	Protein BCCIP-like protein [Harpegnathos saltator]	TSA: Striacosta albicosta stalb_01_00009440 mRNA sequence
AK383908|MFB-26N09	239	21	0	0	3.50855	Protein BCCIP homolog OS=Drosophila melanogaster GN=CG9286 PE=1 SV=2	Putative uncharacterized protein GN=KGM_16808 OS=Danaus plexippus (Monarch butterfly) PE=4 SV=1	--	Protein BCCIP-like protein [Harpegnathos saltator]	TSA: Striacosta albicosta stalb_01_00009440 mRNA sequence
AK377513|fwd-32M22	619	55	0	0	3.49244	Tubulin beta-1 chain OS=Manduca sexta PE=2 SV=1	Beta-tubulin GN=bmtub2 OS=Bombyx mori (Silk moth) PE=2 SV=1	IPR000217: Tubulin; IPR002453: Beta tubulin; IPR003008: Tubulin/FtsZ, GTPase domain; IPR008280: Tubulin/FtsZ, C-terminal; IPR017975: Tubulin, conserved site; IPR018316: Tubulin/FtsZ, 2-layer sandwich domain	beta-tubulin [Mythimna separata]	Bombyx mori beta-tubulin (Tub2), mRNA >gi|19773427|dbj|AB072308.1| Bombyx mori bmtub2 mRNA for beta-tubulin, complete cds
AK380732|fufe12I11	405	36	0	0	3.49185	Tubulin beta-1 chain OS=Manduca sexta PE=2 SV=1	Beta-tubulin GN=bmtub2 OS=Bombyx mori (Silk moth) PE=2 SV=1	IPR000217: Tubulin; IPR002453: Beta tubulin; IPR003008: Tubulin/FtsZ, GTPase domain; IPR008280: Tubulin/FtsZ, C-terminal; IPR017975: Tubulin, conserved site; IPR023123: Tubulin, C-terminal	RecName: Full=Tubulin beta-1 chain; AltName: Full=Beta-1-tubulin >gi|2613141|gb|AAB84297.1| beta-1 tubulin [Manduca sexta]	Bombyx mori beta-tubulin (Tub2), mRNA >gi|19773427|dbj|AB072308.1| Bombyx mori bmtub2 mRNA for beta-tubulin, complete cds
gnl|UG|Bmo#S58878136	405	36	0	0	3.49185	Tubulin beta-1 chain OS=Manduca sexta PE=2 SV=1	Beta-tubulin GN=bmtub2 OS=Bombyx mori (Silk moth) PE=2 SV=1	IPR000217: Tubulin; IPR002453: Beta tubulin; IPR003008: Tubulin/FtsZ, GTPase domain; IPR008280: Tubulin/FtsZ, C-terminal; IPR017975: Tubulin, conserved site; IPR023123: Tubulin, C-terminal	RecName: Full=Tubulin beta-1 chain; AltName: Full=Beta-1-tubulin >gi|2613141|gb|AAB84297.1| beta-1 tubulin [Manduca sexta]	Bombyx mori beta-tubulin (Tub2), mRNA >gi|19773427|dbj|AB072308.1| Bombyx mori bmtub2 mRNA for beta-tubulin, complete cds
AK378049|ffbm37A20	434	39	0	0	3.47615	Tubulin beta-1 chain OS=Manduca sexta PE=2 SV=1	Beta-tubulin GN=bmtub2 OS=Bombyx mori (Silk moth) PE=2 SV=1	IPR000217: Tubulin; IPR002453: Beta tubulin; IPR003008: Tubulin/FtsZ, GTPase domain; IPR008280: Tubulin/FtsZ, C-terminal; IPR017975: Tubulin, conserved site; IPR018316: Tubulin/FtsZ, 2-layer sandwich domain; IPR023123: Tubulin, C-terminal	beta-tubulin [Bombyx mori] >gi|19773428|dbj|BAB86853.1| beta-tubulin [Bombyx mori]	Bombyx mori beta-tubulin (Tub2), mRNA >gi|19773427|dbj|AB072308.1| Bombyx mori bmtub2 mRNA for beta-tubulin, complete cds
gnl|UG|Bmo#S58878461	434	39	0	0	3.47615	Tubulin beta-1 chain OS=Manduca sexta PE=2 SV=1	Beta-tubulin GN=bmtub2 OS=Bombyx mori (Silk moth) PE=2 SV=1	IPR000217: Tubulin; IPR002453: Beta tubulin; IPR003008: Tubulin/FtsZ, GTPase domain; IPR008280: Tubulin/FtsZ, C-terminal; IPR017975: Tubulin, conserved site; IPR018316: Tubulin/FtsZ, 2-layer sandwich domain; IPR023123: Tubulin, C-terminal	beta-tubulin [Bombyx mori] >gi|19773428|dbj|BAB86853.1| beta-tubulin [Bombyx mori]	Bombyx mori beta-tubulin (Tub2), mRNA >gi|19773427|dbj|AB072308.1| Bombyx mori bmtub2 mRNA for beta-tubulin, complete cds
gnl|UG|Bmo#S31276322	111	10	0	0	3.47249	Serine hydroxymethyltransferase, cytosolic OS=Bos taurus GN=SHMT1 PE=2 SV=3	Serine hydroxymethyltransferase OS=Bombyx mori (Silk moth) PE=2 SV=1	IPR001085: Serine hydroxymethyltransferase; IPR015421: Pyridoxal phosphate-dependent transferase, major region, subdomain 1; IPR015422: Pyridoxal phosphate-dependent transferase, major region, subdomain 2; IPR015424: Pyridoxal phosphate-dependent transferase, major domain; IPR019798: Serine hydroxymethyltransferase, pyridoxal phosphate binding site	serine hydroxymethyltransferase [Bombyx mori] >gi|87248603|gb|ABD36354.1| serine hydroxymethyltransferase [Bombyx mori]	Bombyx mori serine hydroxymethyltransferase (LOC692975), mRNA >gi|87248602|gb|DQ311410.1| Bombyx mori serine hydroxymethyltransferase mRNA, complete cds
BGIBMGA004331-TA	121	11	0	0	3.45943	Peptidyl-prolyl cis-trans isomerase FKBP1A OS=Bos taurus GN=FKBP1A PE=1 SV=2	Peptidyl-prolyl cis-trans isomerase OS=Bombyx mori (Silk moth) PE=4 SV=1	IPR001179: Peptidyl-prolyl cis-trans isomerase, FKBP-type, domain; IPR023566: Peptidyl-prolyl cis-trans isomerase, FKBP-type	FK506-binding protein [Bombyx mori] >gi|95102696|gb|ABF51286.1| FK506-binding protein [Bombyx mori]	Bombyx mori FK506-binding protein (Fkbp12), mRNA >gi|95102695|gb|DQ443197.1| Bombyx mori FK506-binding protein mRNA, complete cds
AK377518|fwd-33B15	659	60	0	0	3.45724	Tubulin beta-1 chain OS=Manduca sexta PE=2 SV=1	Beta-tubulin GN=bmtub2 OS=Bombyx mori (Silk moth) PE=2 SV=1	IPR000217: Tubulin; IPR002453: Beta tubulin; IPR003008: Tubulin/FtsZ, GTPase domain; IPR008280: Tubulin/FtsZ, C-terminal; IPR017975: Tubulin, conserved site; IPR018316: Tubulin/FtsZ, 2-layer sandwich domain; IPR023123: Tubulin, C-terminal	beta-tubulin [Bombyx mori] >gi|19773428|dbj|BAB86853.1| beta-tubulin [Bombyx mori]	Bombyx mori beta-tubulin (Tub2), mRNA >gi|19773427|dbj|AB072308.1| Bombyx mori bmtub2 mRNA for beta-tubulin, complete cds
AK377284|fwd-07N19	677	62	0	0	3.44882	Tubulin beta-1 chain OS=Manduca sexta PE=2 SV=1	Beta-tubulin GN=bmtub2 OS=Bombyx mori (Silk moth) PE=2 SV=1	IPR000217: Tubulin; IPR002453: Beta tubulin; IPR003008: Tubulin/FtsZ, GTPase domain; IPR008280: Tubulin/FtsZ, C-terminal; IPR017975: Tubulin, conserved site; IPR018316: Tubulin/FtsZ, 2-layer sandwich domain; IPR023123: Tubulin, C-terminal	beta-tubulin [Bombyx mori] >gi|19773428|dbj|BAB86853.1| beta-tubulin [Bombyx mori]	Bombyx mori beta-tubulin (Tub2), mRNA >gi|19773427|dbj|AB072308.1| Bombyx mori bmtub2 mRNA for beta-tubulin, complete cds
AK377475|fwd-29C23	674	62	0	0	3.44241	Tubulin beta-1 chain OS=Manduca sexta PE=2 SV=1	Beta-tubulin GN=bmtub2 OS=Bombyx mori (Silk moth) PE=2 SV=1	IPR000217: Tubulin; IPR002453: Beta tubulin; IPR003008: Tubulin/FtsZ, GTPase domain; IPR008280: Tubulin/FtsZ, C-terminal; IPR017975: Tubulin, conserved site; IPR018316: Tubulin/FtsZ, 2-layer sandwich domain; IPR023123: Tubulin, C-terminal	beta-tubulin [Bombyx mori] >gi|19773428|dbj|BAB86853.1| beta-tubulin [Bombyx mori]	Bombyx mori beta-tubulin (Tub2), mRNA >gi|19773427|dbj|AB072308.1| Bombyx mori bmtub2 mRNA for beta-tubulin, complete cds
AK377476|fwd-29D19	663	61	0	0	3.44213	Tubulin beta-1 chain OS=Manduca sexta PE=2 SV=1	Beta-tubulin GN=bmtub2 OS=Bombyx mori (Silk moth) PE=2 SV=1	IPR000217: Tubulin; IPR002453: Beta tubulin; IPR003008: Tubulin/FtsZ, GTPase domain; IPR008280: Tubulin/FtsZ, C-terminal; IPR017975: Tubulin, conserved site; IPR018316: Tubulin/FtsZ, 2-layer sandwich domain; IPR023123: Tubulin, C-terminal	beta-tubulin [Bombyx mori] >gi|19773428|dbj|BAB86853.1| beta-tubulin [Bombyx mori]	Bombyx mori beta-tubulin (Tub2), mRNA >gi|19773427|dbj|AB072308.1| Bombyx mori bmtub2 mRNA for beta-tubulin, complete cds
AK377309|fwd-11J16	651	60	0	0	3.43962	Tubulin beta-1 chain OS=Manduca sexta PE=2 SV=1	Beta-tubulin GN=bmtub2 OS=Bombyx mori (Silk moth) PE=2 SV=1	IPR000217: Tubulin; IPR002453: Beta tubulin; IPR003008: Tubulin/FtsZ, GTPase domain; IPR008280: Tubulin/FtsZ, C-terminal; IPR017975: Tubulin, conserved site; IPR018316: Tubulin/FtsZ, 2-layer sandwich domain; IPR023123: Tubulin, C-terminal	beta-tubulin [Bombyx mori] >gi|19773428|dbj|BAB86853.1| beta-tubulin [Bombyx mori]	Bombyx mori beta-tubulin (Tub2), mRNA >gi|19773427|dbj|AB072308.1| Bombyx mori bmtub2 mRNA for beta-tubulin, complete cds
AK377493|fwd-31A24	660	61	0	0	3.43558	Tubulin beta-1 chain OS=Manduca sexta PE=2 SV=1	Beta-tubulin GN=bmtub2 OS=Bombyx mori (Silk moth) PE=2 SV=1	IPR000217: Tubulin; IPR002453: Beta tubulin; IPR003008: Tubulin/FtsZ, GTPase domain; IPR008280: Tubulin/FtsZ, C-terminal; IPR017975: Tubulin, conserved site; IPR018316: Tubulin/FtsZ, 2-layer sandwich domain; IPR023123: Tubulin, C-terminal	beta-tubulin [Bombyx mori] >gi|19773428|dbj|BAB86853.1| beta-tubulin [Bombyx mori]	Bombyx mori beta-tubulin (Tub2), mRNA >gi|19773427|dbj|AB072308.1| Bombyx mori bmtub2 mRNA for beta-tubulin, complete cds
BGIBMGA009132-TA	643	60	0	0	3.42178	Tubulin beta-1 chain OS=Manduca sexta PE=2 SV=1	Beta-tubulin GN=bmtub2 OS=Bombyx mori (Silk moth) PE=2 SV=1	IPR000217: Tubulin; IPR002453: Beta tubulin; IPR003008: Tubulin/FtsZ, GTPase domain; IPR008280: Tubulin/FtsZ, C-terminal; IPR013838: Beta tubulin, autoregulation binding site; IPR017975: Tubulin, conserved site; IPR018316: Tubulin/FtsZ, 2-layer sandwich domain; IPR023123: Tubulin, C-terminal	beta-tubulin [Bombyx mori] >gi|19773428|dbj|BAB86853.1| beta-tubulin [Bombyx mori]	Bombyx mori beta-tubulin (Tub2), mRNA >gi|19773427|dbj|AB072308.1| Bombyx mori bmtub2 mRNA for beta-tubulin, complete cds
BGIBMGA010178-TA	128	12	0	0	3.41504	Serine-arginine protein 55 OS=Drosophila melanogaster GN=B52 PE=1 SV=4	Splicing factor arginine/serine-rich 6 GN=SFRS6 OS=Bombyx mori (Silk moth) PE=2 SV=1	IPR000504: RNA recognition motif domain; IPR012677: Nucleotide-binding, alpha-beta plait	splicing factor arginine/serine-rich 6 [Bombyx mori] >gi|109706819|gb|ABG42996.1| splicing factor arginine/serine-rich 6 [Bombyx mori]	Bombyx mori splicing factor arginine/serine-rich 6 (Sfrs6), mRNA >gi|109706818|gb|DQ648521.1| Bombyx mori splicing factor arginine/serine-rich 6 (SFRS6) mRNA, complete cds
AK383768|MFB-21J22	117	11	0	0	3.41093	Serine hydroxymethyltransferase, cytosolic OS=Bos taurus GN=SHMT1 PE=2 SV=3	Serine hydroxymethyltransferase OS=Bombyx mori (Silk moth) PE=2 SV=1	IPR001085: Serine hydroxymethyltransferase; IPR015421: Pyridoxal phosphate-dependent transferase, major region, subdomain 1; IPR015422: Pyridoxal phosphate-dependent transferase, major region, subdomain 2; IPR015424: Pyridoxal phosphate-dependent transferase, major domain; IPR019798: Serine hydroxymethyltransferase, pyridoxal phosphate binding site	serine hydroxymethyltransferase [Bombyx mori] >gi|87248603|gb|ABD36354.1| serine hydroxymethyltransferase [Bombyx mori]	Bombyx mori serine hydroxymethyltransferase (LOC692975), mRNA >gi|87248602|gb|DQ311410.1| Bombyx mori serine hydroxymethyltransferase mRNA, complete cds
gnl|UG|Bmo#S58880616	563	53	0	0	3.40907	Tubulin beta-1 chain OS=Manduca sexta PE=2 SV=1	CBR-TBB-4 protein OS=Caenorhabditis briggsae PE=4 SV=2	IPR000217: Tubulin; IPR002453: Beta tubulin; IPR003008: Tubulin/FtsZ, GTPase domain; IPR008280: Tubulin/FtsZ, C-terminal; IPR018316: Tubulin/FtsZ, 2-layer sandwich domain; IPR023123: Tubulin, C-terminal	alpha tubulin, putative [Ixodes scapularis] >gi|215498642|gb|EEC08136.1| alpha tubulin, putative [Ixodes scapularis]	Bombyx mori genomic DNA, chromosome 20, BAC clone:014E18, complete sequence
AK377483|fwd-29J19	563	53	0	0	3.40907	Tubulin beta-1 chain OS=Manduca sexta PE=2 SV=1	CBR-TBB-4 protein OS=Caenorhabditis briggsae PE=4 SV=2	IPR000217: Tubulin; IPR002453: Beta tubulin; IPR003008: Tubulin/FtsZ, GTPase domain; IPR008280: Tubulin/FtsZ, C-terminal; IPR018316: Tubulin/FtsZ, 2-layer sandwich domain; IPR023123: Tubulin, C-terminal	alpha tubulin, putative [Ixodes scapularis] >gi|215498642|gb|EEC08136.1| alpha tubulin, putative [Ixodes scapularis]	Bombyx mori genomic DNA, chromosome 20, BAC clone:014E18, complete sequence
BGIBMGA007079-TA	127	12	0	0	3.40372	Serine hydroxymethyltransferase, cytosolic OS=Homo sapiens GN=SHMT1 PE=1 SV=1	Serine hydroxymethyltransferase OS=Bombyx mori (Silk moth) PE=2 SV=1	IPR001085: Serine hydroxymethyltransferase; IPR015421: Pyridoxal phosphate-dependent transferase, major region, subdomain 1; IPR015422: Pyridoxal phosphate-dependent transferase, major region, subdomain 2; IPR015424: Pyridoxal phosphate-dependent transferase, major domain; IPR019798: Serine hydroxymethyltransferase, pyridoxal phosphate binding site	serine hydroxymethyltransferase [Bombyx mori] >gi|87248603|gb|ABD36354.1| serine hydroxymethyltransferase [Bombyx mori]	Bombyx mori serine hydroxymethyltransferase (LOC692975), mRNA >gi|87248602|gb|DQ311410.1| Bombyx mori serine hydroxymethyltransferase mRNA, complete cds
BGIBMGA009698-TA	327	31	0	0	3.39895	Nascent polypeptide-associated complex subunit alpha OS=Drosophila melanogaster GN=Nacalpha PE=1 SV=2	Nascent polypeptide associated complex protein alpha subunit OS=Bombyx mori (Silk moth) PE=2 SV=1	IPR002715: Nascent polypeptide-associated complex NAC; IPR016641: Nascent polypeptide-associated complex, alpha subunit	nascent polypeptide associated complex protein alpha subunit [Bombyx mori] >gi|95102644|gb|ABF51260.1| nascent polypeptide associated complex protein alpha subunit [Bombyx mori]	Bombyx mori nascent polypeptide associated complex protein alpha subunit (LOC732899), mRNA >gi|95102643|gb|DQ443171.1| Bombyx mori nascent polypeptide associated complex protein alpha subunit mRNA, complete cds
gnl|UG|Bmo#S58876998	196	19	0	0	3.36678	Histone H4 OS=Tigriopus californicus GN=His4 PE=3 SV=2	Histone H4 GN=CpipJ_CPIJ012378 OS=Culex quinquefasciatus (Southern house mosquito) PE=3 SV=1	IPR001951: Histone H4; IPR004823: TATA box binding protein associated factor (TAF); IPR007125: Histone core; IPR009072: Histone-fold; IPR019809: Histone H4, conserved site	H4 histone protein [Culex quinquefasciatus] >gi|167873963|gb|EDS37346.1| H4 histone protein [Culex quinquefasciatus]	Bombyx mori histone H4-like protein (H4-l), mRNA >gi|223972585|dbj|AB485604.1| Bombyx mori H4-L mRNA for histone H4-like protein, complete cds
AK382299|fdpe13A18_K00621	196	19	0	0	3.36678	Histone H4 OS=Tigriopus californicus GN=His4 PE=3 SV=2	Histone H4 GN=CpipJ_CPIJ012378 OS=Culex quinquefasciatus (Southern house mosquito) PE=3 SV=1	IPR001951: Histone H4; IPR004823: TATA box binding protein associated factor (TAF); IPR007125: Histone core; IPR009072: Histone-fold; IPR019809: Histone H4, conserved site	H4 histone protein [Culex quinquefasciatus] >gi|167873963|gb|EDS37346.1| H4 histone protein [Culex quinquefasciatus]	Bombyx mori histone H4-like protein (H4-l), mRNA >gi|223972585|dbj|AB485604.1| Bombyx mori H4-L mRNA for histone H4-like protein, complete cds
gnl|UG|Bmo#S58872089	212	21	0	0	3.3356	Nascent polypeptide-associated complex subunit alpha OS=Drosophila melanogaster GN=Nacalpha PE=1 SV=2	Nascent polypeptide associated complex protein alpha subunit OS=Bombyx mori (Silk moth) PE=2 SV=1	IPR002715: Nascent polypeptide-associated complex NAC; IPR016641: Nascent polypeptide-associated complex, alpha subunit	nascent polypeptide associated complex protein alpha subunit [Bombyx mori] >gi|95102644|gb|ABF51260.1| nascent polypeptide associated complex protein alpha subunit [Bombyx mori]	Bombyx mori nascent polypeptide associated complex protein alpha subunit (LOC732899), mRNA >gi|95102643|gb|DQ443171.1| Bombyx mori nascent polypeptide associated complex protein alpha subunit mRNA, complete cds
AK384657|fcaL32A17	212	21	0	0	3.3356	Nascent polypeptide-associated complex subunit alpha OS=Drosophila melanogaster GN=Nacalpha PE=1 SV=2	Nascent polypeptide associated complex protein alpha subunit OS=Bombyx mori (Silk moth) PE=2 SV=1	IPR002715: Nascent polypeptide-associated complex NAC; IPR016641: Nascent polypeptide-associated complex, alpha subunit	nascent polypeptide associated complex protein alpha subunit [Bombyx mori] >gi|95102644|gb|ABF51260.1| nascent polypeptide associated complex protein alpha subunit [Bombyx mori]	Bombyx mori nascent polypeptide associated complex protein alpha subunit (LOC732899), mRNA >gi|95102643|gb|DQ443171.1| Bombyx mori nascent polypeptide associated complex protein alpha subunit mRNA, complete cds
AK384720|fcaL34J04_K01758	151	15	0	0	3.33151	Putative protein TPRXL OS=Homo sapiens GN=TPRXL PE=5 SV=2	Putative uncharacterized protein GN=KGM_20280 OS=Danaus plexippus (Monarch butterfly) PE=4 SV=1	--	histone deacetylase 2C, putative [Pediculus humanus corporis] >gi|212511344|gb|EEB14348.1| histone deacetylase 2C, putative [Pediculus humanus corporis]	TSA: Striacosta albicosta stalb_01_00000313 mRNA sequence
AK378110|fmgV01C20_K05854	110	11	0	0	3.32193	26S proteasome non-ATPase regulatory subunit 7 OS=Drosophila melanogaster GN=Mov34 PE=1 SV=6	Proteasome 26S non-ATPase subunit 7 OS=Bombyx mori (Silk moth) PE=2 SV=1	IPR000555: Mov34/MPN/PAD-1	proteasome 26S non-ATPase subunit 7 [Bombyx mori] >gi|95103074|gb|ABF51478.1| proteasome 26S non-ATPase subunit 7 [Bombyx mori]	Bombyx mori proteasome 26S non-ATPase subunit 7 (LOC733131), mRNA >gi|95103073|gb|DQ443389.1| Bombyx mori proteasome 26S non-ATPase subunit 7 mRNA, complete cds
AK384571|fcaL28H09_K01738	360	36	0	0	3.32193	Nascent polypeptide-associated complex subunit alpha OS=Drosophila melanogaster GN=Nacalpha PE=1 SV=2	Nascent polypeptide associated complex protein alpha subunit OS=Bombyx mori (Silk moth) PE=2 SV=1	IPR002715: Nascent polypeptide-associated complex NAC; IPR016641: Nascent polypeptide-associated complex, alpha subunit	nascent polypeptide associated complex protein alpha subunit [Bombyx mori] >gi|95102644|gb|ABF51260.1| nascent polypeptide associated complex protein alpha subunit [Bombyx mori]	Bombyx mori nascent polypeptide associated complex protein alpha subunit (LOC732899), mRNA >gi|95102643|gb|DQ443171.1| Bombyx mori nascent polypeptide associated complex protein alpha subunit mRNA, complete cds
AK383828|MFB-23J16	266	27	0	0	3.30039	Nascent polypeptide-associated complex subunit alpha OS=Drosophila melanogaster GN=Nacalpha PE=1 SV=2	Nascent polypeptide associated complex protein alpha subunit OS=Bombyx mori (Silk moth) PE=2 SV=1	IPR002715: Nascent polypeptide-associated complex NAC; IPR016641: Nascent polypeptide-associated complex, alpha subunit	nascent polypeptide associated complex protein alpha subunit [Bombyx mori] >gi|95102644|gb|ABF51260.1| nascent polypeptide associated complex protein alpha subunit [Bombyx mori]	Bombyx mori nascent polypeptide associated complex protein alpha subunit (LOC732899), mRNA >gi|95102643|gb|DQ443171.1| Bombyx mori nascent polypeptide associated complex protein alpha subunit mRNA, complete cds
AK386442|fprW07N23	438	45	0	0	3.28293	RNA-binding protein squid OS=Drosophila melanogaster GN=sqd PE=1 SV=3	Bmsqd-1 OS=Bombyx mori (Silk moth) PE=2 SV=1	IPR000504: RNA recognition motif domain; IPR012677: Nucleotide-binding, alpha-beta plait	squid protein homologue [Bombyx mori] >gi|784909|dbj|BAA07210.1| Bmsqd-1 [Bombyx mori]	Bombyx mori squid protein homologue (Sqd), mRNA >gi|784908|dbj|D38013.1|BMOBMSQD1 Bombyx mori mRNA for Bmsqd-1 (Sqd protein homologue), complete cds
gnl|UG|Bmo#S58872662	438	45	0	0	3.28293	RNA-binding protein squid OS=Drosophila melanogaster GN=sqd PE=1 SV=3	Bmsqd-1 OS=Bombyx mori (Silk moth) PE=2 SV=1	IPR000504: RNA recognition motif domain; IPR012677: Nucleotide-binding, alpha-beta plait	squid protein homologue [Bombyx mori] >gi|784909|dbj|BAA07210.1| Bmsqd-1 [Bombyx mori]	Bombyx mori squid protein homologue (Sqd), mRNA >gi|784908|dbj|D38013.1|BMOBMSQD1 Bombyx mori mRNA for Bmsqd-1 (Sqd protein homologue), complete cds
gnl|UG|Bmo#S58875362	106	11	0	0	3.26849	26S proteasome non-ATPase regulatory subunit 7 OS=Drosophila melanogaster GN=Mov34 PE=1 SV=6	Proteasome 26S non-ATPase subunit 7 OS=Bombyx mori (Silk moth) PE=2 SV=1	IPR000555: Mov34/MPN/PAD-1	proteasome 26S non-ATPase subunit 7 [Bombyx mori] >gi|95103074|gb|ABF51478.1| proteasome 26S non-ATPase subunit 7 [Bombyx mori]	Bombyx mori proteasome 26S non-ATPase subunit 7 (LOC733131), mRNA >gi|95103073|gb|DQ443389.1| Bombyx mori proteasome 26S non-ATPase subunit 7 mRNA, complete cds
AK385909|fphe13G14	106	11	0	0	3.26849	26S proteasome non-ATPase regulatory subunit 7 OS=Drosophila melanogaster GN=Mov34 PE=1 SV=6	Proteasome 26S non-ATPase subunit 7 OS=Bombyx mori (Silk moth) PE=2 SV=1	IPR000555: Mov34/MPN/PAD-1	proteasome 26S non-ATPase subunit 7 [Bombyx mori] >gi|95103074|gb|ABF51478.1| proteasome 26S non-ATPase subunit 7 [Bombyx mori]	Bombyx mori proteasome 26S non-ATPase subunit 7 (LOC733131), mRNA >gi|95103073|gb|DQ443389.1| Bombyx mori proteasome 26S non-ATPase subunit 7 mRNA, complete cds
AK382778|fdpe27H02	192	20	0	0	3.26303	Histone H4 OS=Tigriopus californicus GN=His4 PE=3 SV=2	Histone H4 GN=CAOG_02343 OS=Capsaspora owczarzaki (strain ATCC 30864) PE=3 SV=1	IPR002659: Glycosyl transferase, family 31	histone H4 [Capsaspora owczarzaki ATCC 30864]	Bombyx mori histone H4-like protein (H4-l), mRNA >gi|223972585|dbj|AB485604.1| Bombyx mori H4-L mRNA for histone H4-like protein, complete cds
gnl|UG|Bmo#S18411205	172	18	0	0	3.25634	Histone H4 OS=Tigriopus californicus GN=His4 PE=3 SV=2	Histone H4 GN=CAOG_02343 OS=Capsaspora owczarzaki (strain ATCC 30864) PE=3 SV=1	IPR002659: Glycosyl transferase, family 31	histone H4 [Capsaspora owczarzaki ATCC 30864]	Bombyx mori histone H4-like protein (H4-l), mRNA >gi|223972585|dbj|AB485604.1| Bombyx mori H4-L mRNA for histone H4-like protein, complete cds
gnl|UG|Bmo#S58879521	458	48	0	0	3.25424	RNA-binding protein squid OS=Drosophila melanogaster GN=sqd PE=1 SV=3	Bmsqd-2 OS=Bombyx mori (Silk moth) PE=2 SV=1	IPR000504: RNA recognition motif domain; IPR012677: Nucleotide-binding, alpha-beta plait	Bmsqd-2 [Bombyx mori]	Bombyx mori mRNA for Bmsqd-2 (Sqd protein homologue), complete cds
AK377775|fe8d30O11_K01831	458	48	0	0	3.25424	RNA-binding protein squid OS=Drosophila melanogaster GN=sqd PE=1 SV=3	Bmsqd-2 OS=Bombyx mori (Silk moth) PE=2 SV=1	IPR000504: RNA recognition motif domain; IPR012677: Nucleotide-binding, alpha-beta plait	Bmsqd-2 [Bombyx mori]	Bombyx mori mRNA for Bmsqd-2 (Sqd protein homologue), complete cds
AK386602|fprW16K21	143	15	0	0	3.25298	Putative protein TPRXL OS=Homo sapiens GN=TPRXL PE=5 SV=2	Putative uncharacterized protein GN=KGM_20280 OS=Danaus plexippus (Monarch butterfly) PE=4 SV=1	--	histone deacetylase 2C, putative [Pediculus humanus corporis] >gi|212511344|gb|EEB14348.1| histone deacetylase 2C, putative [Pediculus humanus corporis]	TSA: Striacosta albicosta stalb_01_00000313 mRNA sequence
gnl|UG|Bmo#S58872502	143	15	0	0	3.25298	Putative protein TPRXL OS=Homo sapiens GN=TPRXL PE=5 SV=2	Putative uncharacterized protein GN=KGM_20280 OS=Danaus plexippus (Monarch butterfly) PE=4 SV=1	--	histone deacetylase 2C, putative [Pediculus humanus corporis] >gi|212511344|gb|EEB14348.1| histone deacetylase 2C, putative [Pediculus humanus corporis]	TSA: Striacosta albicosta stalb_01_00000313 mRNA sequence
AK385214|e10003O19	299	32	0	0	3.224	Inosine-5'-monophosphate dehydrogenase OS=Drosophila melanogaster GN=ras PE=1 SV=1	Inosine-5'-monophosphate dehydrogenase (Fragment) OS=Anopheles gambiae (African malaria mosquito) PE=3 SV=2	IPR000644: Cystathionine beta-synthase, core; IPR001093: IMP dehydrogenase/GMP reductase; IPR005990: IMP dehydrogenase; IPR013785: Aldolase-type TIM barrel; IPR015875: IMP dehydrogenase / GMP reductase, conserved site; IPR018529: IMP dehydrogenase-related	AGAP011133-PA [Anopheles gambiae str. PEST] >gi|55244858|gb|EAA05291.2| AGAP011133-PA [Anopheles gambiae str. PEST]	TSA: Striacosta albicosta stalb_01_00001351 mRNA sequence
gnl|UG|Bmo#S58880753	299	32	0	0	3.224	Inosine-5'-monophosphate dehydrogenase OS=Drosophila melanogaster GN=ras PE=1 SV=1	Inosine-5'-monophosphate dehydrogenase (Fragment) OS=Anopheles gambiae (African malaria mosquito) PE=3 SV=2	IPR000644: Cystathionine beta-synthase, core; IPR001093: IMP dehydrogenase/GMP reductase; IPR005990: IMP dehydrogenase; IPR013785: Aldolase-type TIM barrel; IPR015875: IMP dehydrogenase / GMP reductase, conserved site; IPR018529: IMP dehydrogenase-related	AGAP011133-PA [Anopheles gambiae str. PEST] >gi|55244858|gb|EAA05291.2| AGAP011133-PA [Anopheles gambiae str. PEST]	TSA: Striacosta albicosta stalb_01_00001351 mRNA sequence
BGIBMGA001035-TA	327	35	0	0	3.22386	Inosine-5'-monophosphate dehydrogenase OS=Drosophila melanogaster GN=ras PE=1 SV=1	Inosine-5'-monophosphate dehydrogenase OS=Aedes aegypti (Yellowfever mosquito) PE=3 SV=1	IPR000644: Cystathionine beta-synthase, core; IPR001093: IMP dehydrogenase/GMP reductase; IPR005990: IMP dehydrogenase; IPR013785: Aldolase-type TIM barrel; IPR015875: IMP dehydrogenase / GMP reductase, conserved site; IPR018529: IMP dehydrogenase-related	inosine-5-monophosphate dehydrogenase [Aedes aegypti] >gi|108874647|gb|EAT38872.1| inosine-5-monophosphate dehydrogenase [Aedes aegypti]	TSA: Striacosta albicosta stalb_01_00001351 mRNA sequence
BGIBMGA005994-TA	121	13	0	0	3.21842	26S proteasome non-ATPase regulatory subunit 7 OS=Drosophila melanogaster GN=Mov34 PE=1 SV=6	Proteasome 26S non-ATPase subunit 7 OS=Bombyx mori (Silk moth) PE=2 SV=1	IPR000555: Mov34/MPN/PAD-1	proteasome 26S non-ATPase subunit 7 [Bombyx mori] >gi|95103074|gb|ABF51478.1| proteasome 26S non-ATPase subunit 7 [Bombyx mori]	Bombyx mori proteasome 26S non-ATPase subunit 7 (LOC733131), mRNA >gi|95103073|gb|DQ443389.1| Bombyx mori proteasome 26S non-ATPase subunit 7 mRNA, complete cds
BGIBMGA013464-TA	629	68	0	0	3.20945	RNA-binding protein squid OS=Drosophila melanogaster GN=sqd PE=1 SV=3	Bmsqd-1 OS=Bombyx mori (Silk moth) PE=2 SV=1	IPR000504: RNA recognition motif domain; IPR012677: Nucleotide-binding, alpha-beta plait	squid protein homologue [Bombyx mori] >gi|784909|dbj|BAA07210.1| Bmsqd-1 [Bombyx mori]	Bombyx mori squid protein homologue (Sqd), mRNA >gi|784908|dbj|D38013.1|BMOBMSQD1 Bombyx mori mRNA for Bmsqd-1 (Sqd protein homologue), complete cds
BGIBMGA014578-TA	111	12	0	0	3.20945	Histone H1 OS=Drosophila melanogaster GN=His1 PE=1 SV=1	Putative uncharacterized protein GN=KGM_19629 OS=Danaus plexippus (Monarch butterfly) PE=3 SV=1	IPR005818: Histone H1/H5; IPR005819: Histone H5; IPR011991: Winged helix-turn-helix transcription repressor DNA-binding	histone H1 [Anthonomus grandis]	Anthonomus grandis histone H2A, histone H2B, histone H3, histone H4, and histone H1 genes, complete cds; and 18S ribosomal RNA gene, internal transcribed spacer 1, 5.8S ribosomal RNA gene, internal transcribed spacer 2, and 28S ribosomal RNA gene, complete sequence
AK388572|MSV329F11	275	30	0	0	3.1964	Alcohol dehydrogenase 2 OS=Ceratitis cosyra GN=ADH2 PE=3 SV=1	Alcohol dehydrogenase OS=Bombyx mori (Silk moth) PE=2 SV=1	IPR002198: Short-chain dehydrogenase/reductase SDR; IPR002347: Glucose/ribitol dehydrogenase; IPR016040: NAD(P)-binding domain	alcohol dehydrogenase [Bombyx mori] >gi|95102848|gb|ABF51365.1| alcohol dehydrogenase [Bombyx mori]	Bombyx mori alcohol dehydrogenase (LOC732963), mRNA >gi|95102847|gb|DQ443276.1| Bombyx mori alcohol dehydrogenase mRNA, complete cds
gnl|UG|Bmo#S58871495	275	30	0	0	3.1964	Alcohol dehydrogenase 2 OS=Ceratitis cosyra GN=ADH2 PE=3 SV=1	Alcohol dehydrogenase OS=Bombyx mori (Silk moth) PE=2 SV=1	IPR002198: Short-chain dehydrogenase/reductase SDR; IPR002347: Glucose/ribitol dehydrogenase; IPR016040: NAD(P)-binding domain	alcohol dehydrogenase [Bombyx mori] >gi|95102848|gb|ABF51365.1| alcohol dehydrogenase [Bombyx mori]	Bombyx mori alcohol dehydrogenase (LOC732963), mRNA >gi|95102847|gb|DQ443276.1| Bombyx mori alcohol dehydrogenase mRNA, complete cds
AK382499|fdpe19H10	100	11	0	0	3.18442	Maternal protein exuperantia OS=Drosophila virilis GN=exu PE=3 SV=1	Exuperantia OS=Bombyx mori (Silk moth) PE=2 SV=1	IPR012337: Ribonuclease H-like	exuperantia [Bombyx mori] >gi|87248129|gb|ABD36117.1| exuperantia [Bombyx mori]	Bombyx mori exuperantia (LOC692812), mRNA >gi|87248128|gb|DQ311172.1| Bombyx mori exuperantia mRNA, complete cds
AK386315|fprW02J03	208	23	0	0	3.17688	GTP-binding nuclear protein Ran OS=Drosophila melanogaster GN=ran PE=1 SV=1	GTP-binding nuclear protein Ran OS=Bombyx mori (Silk moth) PE=2 SV=1	IPR001806: Small GTPase superfamily; IPR002041: Ran GTPase; IPR003578: Small GTPase superfamily, Rho type; IPR003579: Small GTPase superfamily, Rab type; IPR005225: Small GTP-binding protein domain; IPR020849: Small GTPase superfamily, Ras type	GTP-binding nuclear protein Ran [Bombyx mori] >gi|87248587|gb|ABD36346.1| GTP-binding nuclear protein Ran [Bombyx mori]	Bombyx mori GTP-binding nuclear protein Ran (LOC692970), mRNA >gi|87248586|gb|DQ311402.1| Bombyx mori GTP-binding nuclear protein Ran mRNA, complete cds
gnl|UG|Bmo#S18423481	153	17	0	0	3.16993	Probable bifunctional methylenetetrahydrofolate dehydrogenase/cyclohydrolase 2 OS=Homo sapiens GN=MTHFD2L PE=2 SV=2	Methylenetetrahydrofolate dehydrogenase GN=KGM_10477 OS=Danaus plexippus (Monarch butterfly) PE=3 SV=1	IPR000672: Tetrahydrofolate dehydrogenase/cyclohydrolase; IPR016040: NAD(P)-binding domain; IPR020630: Tetrahydrofolate dehydrogenase/cyclohydrolase, catalytic domain; IPR020631: Tetrahydrofolate dehydrogenase/cyclohydrolase, NAD(P)-binding domain; IPR020867: Tetrahydrofolate dehydrogenase/cyclohydrolase, conserved site	bifunctional protein folD [Culex quinquefasciatus] >gi|167881138|gb|EDS44521.1| bifunctional protein folD [Culex quinquefasciatus]	--
AK381333|fufe41G17	204	23	0	0	3.14886	GTP-binding nuclear protein Ran OS=Drosophila melanogaster GN=ran PE=1 SV=1	GTP-binding nuclear protein Ran OS=Bombyx mori (Silk moth) PE=2 SV=1	IPR001806: Small GTPase superfamily; IPR002041: Ran GTPase; IPR003578: Small GTPase superfamily, Rho type; IPR003579: Small GTPase superfamily, Rab type; IPR005225: Small GTP-binding protein domain; IPR020849: Small GTPase superfamily, Ras type	GTP-binding nuclear protein Ran [Bombyx mori] >gi|87248587|gb|ABD36346.1| GTP-binding nuclear protein Ran [Bombyx mori]	Bombyx mori GTP-binding nuclear protein Ran (LOC692970), mRNA >gi|87248586|gb|DQ311402.1| Bombyx mori GTP-binding nuclear protein Ran mRNA, complete cds
AK384837|fcaL40G10	204	23	0	0	3.14886	GTP-binding nuclear protein Ran OS=Drosophila melanogaster GN=ran PE=1 SV=1	GTP-binding nuclear protein Ran OS=Bombyx mori (Silk moth) PE=2 SV=1	IPR001806: Small GTPase superfamily; IPR002041: Ran GTPase; IPR003578: Small GTPase superfamily, Rho type; IPR003579: Small GTPase superfamily, Rab type; IPR005225: Small GTP-binding protein domain; IPR020849: Small GTPase superfamily, Ras type	GTP-binding nuclear protein Ran [Bombyx mori] >gi|87248587|gb|ABD36346.1| GTP-binding nuclear protein Ran [Bombyx mori]	Bombyx mori GTP-binding nuclear protein Ran (LOC692970), mRNA >gi|87248586|gb|DQ311402.1| Bombyx mori GTP-binding nuclear protein Ran mRNA, complete cds
gnl|UG|Bmo#S58873793	204	23	0	0	3.14886	GTP-binding nuclear protein Ran OS=Drosophila melanogaster GN=ran PE=1 SV=1	GTP-binding nuclear protein Ran OS=Bombyx mori (Silk moth) PE=2 SV=1	IPR001806: Small GTPase superfamily; IPR002041: Ran GTPase; IPR003578: Small GTPase superfamily, Rho type; IPR003579: Small GTPase superfamily, Rab type; IPR005225: Small GTP-binding protein domain; IPR020849: Small GTPase superfamily, Ras type	GTP-binding nuclear protein Ran [Bombyx mori] >gi|87248587|gb|ABD36346.1| GTP-binding nuclear protein Ran [Bombyx mori]	Bombyx mori GTP-binding nuclear protein Ran (LOC692970), mRNA >gi|87248586|gb|DQ311402.1| Bombyx mori GTP-binding nuclear protein Ran mRNA, complete cds
BGIBMGA005559-TA	283	32	0	0	3.14466	Mesencephalic astrocyte-derived neurotrophic factor homolog OS=Drosophila yakuba GN=Manf PE=3 SV=1	Putative ARP-like GN=HM00028 OS=Heliconius melpomene PE=4 SV=1	IPR019345: Armet protein	putative ARP-like [Heliconius melpomene]	TSA: Striacosta albicosta stalb_01_00002693 mRNA sequence
BGIBMGA011696-TA	141	16	0	0	3.13955	Putative protein TPRXL OS=Homo sapiens GN=TPRXL PE=5 SV=2	Putative uncharacterized protein GN=KGM_20280 OS=Danaus plexippus (Monarch butterfly) PE=4 SV=1	--	histone deacetylase 2C, putative [Pediculus humanus corporis] >gi|212511344|gb|EEB14348.1| histone deacetylase 2C, putative [Pediculus humanus corporis]	TSA: Striacosta albicosta stalb_01_00000313 mRNA sequence
AK383459|MFB-07I08	114	13	0	0	3.13245	Microtubule-associated protein RP/EB family member 1 OS=Bos taurus GN=MAPRE1 PE=2 SV=3	Microtubule-associated protein RP/EB family member 3 OS=Bombyx mori (Silk moth) PE=2 SV=1	IPR001715: Calponin homology domain; IPR004953: EB1, C-terminal	microtubule-associated protein RP/EB family member 3 [Bombyx mori] >gi|87248487|gb|ABD36296.1| microtubule-associated protein RP/EB family member 3 [Bombyx mori]	Bombyx mori microtubule-associated protein RP/EB family member 3 (LOC693103), mRNA >gi|87248486|gb|DQ311352.1| Bombyx mori microtubule-associated protein RP/EB family member 3 mRNA, complete cds
gnl|UG|Bmo#S58871333	114	13	0	0	3.13245	Microtubule-associated protein RP/EB family member 1 OS=Bos taurus GN=MAPRE1 PE=2 SV=3	Microtubule-associated protein RP/EB family member 3 OS=Bombyx mori (Silk moth) PE=2 SV=1	IPR001715: Calponin homology domain; IPR004953: EB1, C-terminal	microtubule-associated protein RP/EB family member 3 [Bombyx mori] >gi|87248487|gb|ABD36296.1| microtubule-associated protein RP/EB family member 3 [Bombyx mori]	Bombyx mori microtubule-associated protein RP/EB family member 3 (LOC693103), mRNA >gi|87248486|gb|DQ311352.1| Bombyx mori microtubule-associated protein RP/EB family member 3 mRNA, complete cds
BGIBMGA007224-TA	105	12	0	0	3.12928	28 kDa heat- and acid-stable phosphoprotein OS=Rattus norvegicus GN=Pdap1 PE=1 SV=1	Putative uncharacterized protein GN=KGM_08576 OS=Danaus plexippus (Monarch butterfly) PE=4 SV=1	IPR019380: Casein kinase substrate, phosphoprotein PP28	hypothetical protein TcasGA2_TC005877 [Tribolium castaneum]	TSA: Spodoptera littoralis CL73Contig1.Spli mRNA sequence
BGIBMGA012772-TA	300	35	0	0	3.09954	ATP-dependent RNA helicase WM6 OS=Drosophila melanogaster GN=Hel25E PE=1 SV=1	Putative uncharacterized protein GN=KGM_15394 OS=Danaus plexippus (Monarch butterfly) PE=4 SV=1	IPR001650: Helicase, C-terminal; IPR011545: DNA/RNA helicase, DEAD/DEAH box type, N-terminal; IPR014001: DEAD-like helicase; IPR014014: RNA helicase, DEAD-box type, Q motif	PREDICTED: similar to Helicase at 25E CG7269-PA, isoform A [Apis mellifera]	TSA: Striacosta albicosta stalb_01_00001921 mRNA sequence
gnl|UG|Bmo#S58880014	119	14	0	0	3.08746	N-acetyllactosaminide beta-1,3-N-acetylglucosaminyltransferase OS=Pongo abelii GN=B3GNT1 PE=2 SV=1	N-acetyl lactosaminide beta-1,3-N-acetyl glucosaminyl transferase GN=KGM_02988 OS=Danaus plexippus (Monarch butterfly) PE=4 SV=1	--	N-acetyllactosaminide beta-1,3-N-acetylglucosaminyltransferase, putative [Aedes aegypti] >gi|108871760|gb|EAT35985.1| N-acetyllactosaminide beta-1,3-N-acetylglucosaminyltransferase, putative [Aedes aegypti]	TSA: Bemisia tabaci BT_Q_ZJU_Singletons7708 mRNA sequence
AK387100|bmmt19K12	119	14	0	0	3.08746	N-acetyllactosaminide beta-1,3-N-acetylglucosaminyltransferase OS=Pongo abelii GN=B3GNT1 PE=2 SV=1	N-acetyl lactosaminide beta-1,3-N-acetyl glucosaminyl transferase GN=KGM_02988 OS=Danaus plexippus (Monarch butterfly) PE=4 SV=1	--	N-acetyllactosaminide beta-1,3-N-acetylglucosaminyltransferase, putative [Aedes aegypti] >gi|108871760|gb|EAT35985.1| N-acetyllactosaminide beta-1,3-N-acetylglucosaminyltransferase, putative [Aedes aegypti]	TSA: Bemisia tabaci BT_Q_ZJU_Singletons7708 mRNA sequence
BGIBMGA013996-TA	125	15	0	0	3.05889	Maternal protein exuperantia OS=Drosophila virilis GN=exu PE=3 SV=1	Exuperantia OS=Bombyx mori (Silk moth) PE=2 SV=1	--	exuperantia [Bombyx mori] >gi|87248129|gb|ABD36117.1| exuperantia [Bombyx mori]	Bombyx mori exuperantia (LOC692812), mRNA >gi|87248128|gb|DQ311172.1| Bombyx mori exuperantia mRNA, complete cds
gnl|UG|Bmo#S55966002	100	12	0	0	3.05889	--	Putative uncharacterized protein GN=KGM_16626 OS=Danaus plexippus (Monarch butterfly) PE=4 SV=1	--	--	--
gnl|UG|Bmo#S58879435	108	13	0	0	3.05445	Eukaryotic translation initiation factor 3 subunit M OS=Aedes aegypti GN=AAEL004347 PE=3 SV=1	Putative uncharacterized protein GN=KGM_02789 OS=Danaus plexippus (Monarch butterfly) PE=4 SV=1	IPR000717: Proteasome component (PCI) domain	dendritic cell protein [Aedes aegypti] >gi|122106498|sp|Q17D30.1|EIF3M_AEDAE RecName: Full=Eukaryotic translation initiation factor 3 subunit M; Short=eIF3m >gi|108880066|gb|EAT44291.1| dendritic cell protein [Aedes aegypti]	TSA: Striacosta albicosta stalb_01_00014574 mRNA sequence
AK383743|MFB-20K15	108	13	0	0	3.05445	Eukaryotic translation initiation factor 3 subunit M OS=Aedes aegypti GN=AAEL004347 PE=3 SV=1	Putative uncharacterized protein GN=KGM_02789 OS=Danaus plexippus (Monarch butterfly) PE=4 SV=1	IPR000717: Proteasome component (PCI) domain	dendritic cell protein [Aedes aegypti] >gi|122106498|sp|Q17D30.1|EIF3M_AEDAE RecName: Full=Eukaryotic translation initiation factor 3 subunit M; Short=eIF3m >gi|108880066|gb|EAT44291.1| dendritic cell protein [Aedes aegypti]	TSA: Striacosta albicosta stalb_01_00014574 mRNA sequence
AK383774|MFB-21N12	249	30	0	0	3.05311	Mesencephalic astrocyte-derived neurotrophic factor homolog OS=Drosophila yakuba GN=Manf PE=3 SV=1	Putative ARP-like GN=HM00028 OS=Heliconius melpomene PE=4 SV=1	IPR019345: Armet protein	putative ARP-like [Heliconius melpomene]	TSA: Striacosta albicosta stalb_01_00002693 mRNA sequence
gnl|UG|Bmo#S58879404	249	30	0	0	3.05311	Mesencephalic astrocyte-derived neurotrophic factor homolog OS=Drosophila yakuba GN=Manf PE=3 SV=1	Putative ARP-like GN=HM00028 OS=Heliconius melpomene PE=4 SV=1	IPR019345: Armet protein	putative ARP-like [Heliconius melpomene]	TSA: Striacosta albicosta stalb_01_00002693 mRNA sequence
BGIBMGA002355-TA	240	29	0	0	3.04891	Probable bifunctional methylenetetrahydrofolate dehydrogenase/cyclohydrolase 2 OS=Homo sapiens GN=MTHFD2L PE=2 SV=2	Methylenetetrahydrofolate dehydrogenase GN=KGM_10477 OS=Danaus plexippus (Monarch butterfly) PE=3 SV=1	IPR000672: Tetrahydrofolate dehydrogenase/cyclohydrolase; IPR016040: NAD(P)-binding domain; IPR020630: Tetrahydrofolate dehydrogenase/cyclohydrolase, catalytic domain; IPR020631: Tetrahydrofolate dehydrogenase/cyclohydrolase, NAD(P)-binding domain; IPR020867: Tetrahydrofolate dehydrogenase/cyclohydrolase, conserved site	bifunctional protein folD [Culex quinquefasciatus] >gi|167881138|gb|EDS44521.1| bifunctional protein folD [Culex quinquefasciatus]	TSA: Striacosta albicosta stalb_01_00004326 mRNA sequence
BGIBMGA006789-TA	157	19	0	0	3.04669	Malectin OS=Homo sapiens GN=MLEC PE=1 SV=1	Putative uncharacterized protein GN=KGM_22518 OS=Danaus plexippus (Monarch butterfly) PE=4 SV=1	IPR021720: Malectin	conserved hypothetical protein [Pediculus humanus corporis] >gi|212511844|gb|EEB14720.1| conserved hypothetical protein [Pediculus humanus corporis]	TSA: Striacosta albicosta stalb_01_00003026 mRNA sequence
AK383616|MFB-14E15	673	82	0	0	3.03691	Voltage-dependent anion-selective channel OS=Drosophila melanogaster GN=porin PE=1 SV=3	Putative voltage-dependent anion-selective channel isoform 1 GN=KGM_22196 OS=Danaus plexippus (Monarch butterfly) PE=4 SV=1	IPR001925: Porin, eukaryotic type	PREDICTED: similar to voltage-dependent anion-selective channel isoform 2 [Tribolium castaneum]	TSA: Spodoptera littoralis CL1Contig342.Spli mRNA sequence
AK387840|bmte16O14	504	62	0	0	3.02308	Voltage-dependent anion-selective channel OS=Drosophila melanogaster GN=porin PE=1 SV=3	Putative voltage-dependent anion-selective channel isoform 1 GN=KGM_22196 OS=Danaus plexippus (Monarch butterfly) PE=4 SV=1	IPR001925: Porin, eukaryotic type	PREDICTED: similar to voltage-dependent anion-selective channel isoform 2 [Tribolium castaneum]	TSA: Spodoptera littoralis CL1Contig342.Spli mRNA sequence
gnl|UG|Bmo#S58874237	504	62	0	0	3.02308	Voltage-dependent anion-selective channel OS=Drosophila melanogaster GN=porin PE=1 SV=3	Putative voltage-dependent anion-selective channel isoform 1 GN=KGM_22196 OS=Danaus plexippus (Monarch butterfly) PE=4 SV=1	IPR001925: Porin, eukaryotic type	PREDICTED: similar to voltage-dependent anion-selective channel isoform 2 [Tribolium castaneum]	TSA: Spodoptera littoralis CL1Contig342.Spli mRNA sequence
BGIBMGA009418-TA	130	16	0	0	3.02237	ADIPOR-like receptor CG5315 OS=Drosophila melanogaster GN=CG5315 PE=1 SV=2	Adiponectin receptor 2 (Fragment) OS=Heliconius melpomene melpomene PE=4 SV=1	IPR004254: Hly-III-related	adiponectin receptor 2 [Heliconius cydno cordula] >gi|298399931|gb|ADI81285.1| adiponectin receptor 2 [Heliconius cydno cordula] >gi|298399933|gb|ADI81286.1| adiponectin receptor 2 [Heliconius cydno cordula] >gi|298399935|gb|ADI81287.1| adiponectin receptor 2 [Heliconius cydno cordula] >gi|298399937|gb|ADI81288.1| adiponectin receptor 2 [Heliconius cydno cordula] >gi|298399939|gb|ADI81289.1| adip…	Bombyx mori adiponectin receptor (LOC100101223), mRNA >gi|148841249|gb|EF062308.2| Bombyx mori adiponectin receptor mRNA, complete cds
gnl|UG|Bmo#S18415326	340	42	0	0	3.01707	Tubulin beta-1 chain OS=Manduca sexta PE=2 SV=1	Beta-tubulin GN=bmtub1 OS=Bombyx mori (Silk moth) PE=2 SV=1	IPR000217: Tubulin; IPR002453: Beta tubulin; IPR003008: Tubulin/FtsZ, GTPase domain; IPR017975: Tubulin, conserved site	beta-tubulin [Bombyx mori] >gi|19773426|dbj|BAB86852.1| beta-tubulin [Bombyx mori]	Bombyx mori beta-tubulin (Tub1), mRNA >gi|19773425|dbj|AB072307.1| Bombyx mori bmtub1 mRNA for beta-tubulin, complete cds
gnl|UG|Bmo#S55973173	267	33	0	0	3.0163	ATP-dependent RNA helicase WM6 OS=Drosophila melanogaster GN=Hel25E PE=1 SV=1	Putative uncharacterized protein GN=KGM_15394 OS=Danaus plexippus (Monarch butterfly) PE=4 SV=1	IPR001650: Helicase, C-terminal; IPR011545: DNA/RNA helicase, DEAD/DEAH box type, N-terminal; IPR014001: DEAD-like helicase	PREDICTED: similar to DEAD box ATP-dependent RNA helicase [Tribolium castaneum] >gi|270007718|gb|EFA04166.1| hypothetical protein TcasGA2_TC014413 [Tribolium castaneum]	TSA: Striacosta albicosta stalb_01_00001921 mRNA sequence
gnl|UG|Bmo#S32890837	129	16	0	0	3.01123	Eukaryotic peptide chain release factor GTP-binding subunit ERF3A OS=Mus musculus GN=Gspt1 PE=1 SV=1	GTP binding translation release factor isoform 2 OS=Bombyx mori (Silk moth) PE=2 SV=1	IPR000795: Protein synthesis factor, GTP-binding; IPR004160: Translation elongation factor EFTu/EF1A, C-terminal; IPR009000: Translation elongation/initiation factor/Ribosomal, beta-barrel; IPR009001: Translation elongation factor EF1A/initiation factor IF2gamma, C-terminal; IPR009818: Ataxin-2, C-terminal	Ef1alpha-like factor isoform 2 [Bombyx mori] >gi|95102884|gb|ABF51383.1| GTP binding translation release factor isoform 2 [Bombyx mori]	Bombyx mori Ef1alpha-like factor (Elf), transcript variant 2, mRNA >gi|95102883|gb|DQ443294.1| Bombyx mori GTP binding translation release factor isoform 2 mRNA, complete cds
gnl|UG|Bmo#S58881127	161	20	0	0	3.00899	Dolichyl-diphosphooligosaccharide--protein glycosyltransferase subunit 1 OS=Macaca fascicularis GN=RPN1 PE=2 SV=1	Olygosaccharyltransferase alpha subunit OS=Aedes aegypti (Yellowfever mosquito) PE=2 SV=1	IPR007676: Ribophorin I	olygosaccharyltransferase alpha subunit [Aedes aegypti]	TSA: Striacosta albicosta stalb_01_00001915 mRNA sequence
AK383632|MFB-15A08	161	20	0	0	3.00899	Dolichyl-diphosphooligosaccharide--protein glycosyltransferase subunit 1 OS=Macaca fascicularis GN=RPN1 PE=2 SV=1	Olygosaccharyltransferase alpha subunit OS=Aedes aegypti (Yellowfever mosquito) PE=2 SV=1	IPR007676: Ribophorin I	olygosaccharyltransferase alpha subunit [Aedes aegypti]	TSA: Striacosta albicosta stalb_01_00001915 mRNA sequence
AK386492|fprW09N07	151	19	0	0	2.99048	Serine/arginine-rich splicing factor 2 OS=Rattus norvegicus GN=Srsf2 PE=1 SV=3	Sr protein OS=Bombyx mori (Silk moth) PE=2 SV=1	IPR000504: RNA recognition motif domain; IPR012677: Nucleotide-binding, alpha-beta plait	Sr protein [Bombyx mori] >gi|87248221|gb|ABD36163.1| Sr protein [Bombyx mori]	Bombyx mori Sr protein (LOC692842), mRNA >gi|87248220|gb|DQ311218.1| Bombyx mori Sr protein mRNA, complete cds
gnl|UG|Bmo#S58872612	151	19	0	0	2.99048	Serine/arginine-rich splicing factor 2 OS=Rattus norvegicus GN=Srsf2 PE=1 SV=3	Sr protein OS=Bombyx mori (Silk moth) PE=2 SV=1	IPR000504: RNA recognition motif domain; IPR012677: Nucleotide-binding, alpha-beta plait	Sr protein [Bombyx mori] >gi|87248221|gb|ABD36163.1| Sr protein [Bombyx mori]	Bombyx mori Sr protein (LOC692842), mRNA >gi|87248220|gb|DQ311218.1| Bombyx mori Sr protein mRNA, complete cds
BGIBMGA009131-TA	436	55	0	0	2.98682	Tubulin beta-1 chain OS=Manduca sexta PE=2 SV=1	Beta-tubulin GN=bmtub1 OS=Bombyx mori (Silk moth) PE=2 SV=1	IPR000217: Tubulin; IPR002453: Beta tubulin; IPR003008: Tubulin/FtsZ, GTPase domain; IPR008280: Tubulin/FtsZ, C-terminal; IPR013838: Beta tubulin, autoregulation binding site; IPR018316: Tubulin/FtsZ, 2-layer sandwich domain; IPR023123: Tubulin, C-terminal	beta-tubulin [Bombyx mori] >gi|19773426|dbj|BAB86852.1| beta-tubulin [Bombyx mori]	Bombyx mori genomic DNA, chromosome 20, BAC clone:014E18, complete sequence
BGIBMGA006260-TA	205	26	0	0	2.97904	Heterogeneous nuclear ribonucleoprotein Q OS=Mus musculus GN=Syncrip PE=1 SV=2	Heterogeneous nuclear ribonucleoprotein r GN=CpipJ_CPIJ003738 OS=Culex quinquefasciatus (Southern house mosquito) PE=4 SV=1	IPR000504: RNA recognition motif domain; IPR012677: Nucleotide-binding, alpha-beta plait	heterogeneous nuclear ribonucleoprotein r [Culex quinquefasciatus] >gi|167876604|gb|EDS39987.1| heterogeneous nuclear ribonucleoprotein r [Culex quinquefasciatus]	TSA: Spodoptera littoralis CL17Contig1.Spli mRNA sequence
AK386455|fprW08G10	134	17	0	0	2.97863	Eukaryotic peptide chain release factor GTP-binding subunit ERF3A OS=Mus musculus GN=Gspt1 PE=1 SV=1	Elongation factor 1 alpha OS=Bombyx mori (Silk moth) PE=2 SV=1	IPR000795: Protein synthesis factor, GTP-binding; IPR003285: Yeast eukaryotic release factor; IPR004160: Translation elongation factor EFTu/EF1A, C-terminal; IPR004161: Translation elongation factor EFTu/EF1A, domain 2; IPR009000: Translation elongation/initiation factor/Ribosomal, beta-barrel; IPR009001: Translation elongation factor EF1A/initiation factor IF2gamma, C-terminal	Ef1alpha-like factor isoform 1 [Bombyx mori] >gi|87248115|gb|ABD36110.1| elongation factor 1 alpha [Bombyx mori]	Bombyx mori Ef1alpha-like factor (Elf), transcript variant 2, mRNA >gi|95102883|gb|DQ443294.1| Bombyx mori GTP binding translation release factor isoform 2 mRNA, complete cds
BGIBMGA012541-TA	118	15	0	0	2.97575	DnaJ homolog subfamily A member 1 OS=Homo sapiens GN=DNAJA1 PE=1 SV=2	DnaJ-2 OS=Bombyx mori (Silk moth) PE=2 SV=1	IPR001305: Heat shock protein DnaJ, cysteine-rich domain; IPR001623: Heat shock protein DnaJ, N-terminal; IPR002939: Chaperone DnaJ, C-terminal; IPR003095: Heat shock protein DnaJ; IPR008971: HSP40/DnaJ peptide-binding; IPR012724: Chaperone DnaJ; IPR018253: Heat shock protein DnaJ, conserved site	DnaJ (Hsp40) homolog 2 [Bombyx mori] >gi|87248655|gb|ABD36380.1| DnaJ homolog subfamily A member 1 [Bombyx mori] >gi|253721945|gb|ACT34036.1| DnaJ-2 [Bombyx mori]	Bombyx mori DnaJ-2 mRNA, complete cds
AK377428|fwd-23F24	173	22	0	0	2.9752	Large neutral amino acids transporter small subunit 1 OS=Homo sapiens GN=SLC7A5 PE=1 SV=2	Putative uncharacterized protein GN=KGM_14685 OS=Danaus plexippus (Monarch butterfly) PE=4 SV=1	IPR002293: Amino acid/polyamine transporter I; IPR004841: Amino acid permease domain	PREDICTED: similar to CG3297-PB [Nasonia vitripennis]	PREDICTED: Tribolium castaneum similar to amino acids transporter (LOC659247), mRNA
gnl|UG|Bmo#S58880671	173	22	0	0	2.9752	Large neutral amino acids transporter small subunit 1 OS=Homo sapiens GN=SLC7A5 PE=1 SV=2	Putative uncharacterized protein GN=KGM_14685 OS=Danaus plexippus (Monarch butterfly) PE=4 SV=1	IPR002293: Amino acid/polyamine transporter I; IPR004841: Amino acid permease domain	PREDICTED: similar to CG3297-PB [Nasonia vitripennis]	PREDICTED: Tribolium castaneum similar to amino acids transporter (LOC659247), mRNA
AK386272|fprW01K12	157	20	0	0	2.97269	Eukaryotic peptide chain release factor GTP-binding subunit ERF3A OS=Mus musculus GN=Gspt1 PE=1 SV=1	Elongation factor 1 alpha OS=Bombyx mori (Silk moth) PE=2 SV=1	IPR000795: Protein synthesis factor, GTP-binding; IPR003285: Yeast eukaryotic release factor; IPR004160: Translation elongation factor EFTu/EF1A, C-terminal; IPR004161: Translation elongation factor EFTu/EF1A, domain 2; IPR009000: Translation elongation/initiation factor/Ribosomal, beta-barrel; IPR009001: Translation elongation factor EF1A/initiation factor IF2gamma, C-terminal; IPR009818: Ataxin…	Ef1alpha-like factor isoform 1 [Bombyx mori] >gi|87248115|gb|ABD36110.1| elongation factor 1 alpha [Bombyx mori]	Bombyx mori Ef1alpha-like factor (Elf), transcript variant 1, mRNA >gi|87248114|gb|DQ311165.1| Bombyx mori elongation factor 1 alpha mRNA, complete cds
BGIBMGA011973-TA	125	16	0	0	2.96578	Diphosphoinositol polyphosphate phosphohydrolase 2 OS=Pongo abelii GN=NUDT4 PE=2 SV=1	Putative uncharacterized protein GN=KGM_15106 OS=Danaus plexippus (Monarch butterfly) PE=3 SV=1	IPR000086: NUDIX hydrolase domain; IPR015797: NUDIX hydrolase domain-like; IPR020084: NUDIX hydrolase, conserved site	diadenosine and diphosphoinositol polyphosphate phosphohydrolase [Glossina morsitans morsitans]	Bombyx mori DNA, chromosome 11, clone:559G11, complete sequence
gnl|UG|Bmo#S58877244	117	15	0	0	2.96347	Valyl-tRNA synthetase OS=Rattus norvegicus GN=Vars PE=2 SV=2	GI21262 GN=GI21262 OS=Drosophila mojavensis (Fruit fly) PE=3 SV=1	IPR001412: Aminoacyl-tRNA synthetase, class I, conserved site; IPR002300: Aminoacyl-tRNA synthetase, class Ia; IPR002303: Valyl-tRNA synthetase; IPR009008: Valyl/Leucyl/Isoleucyl-tRNA synthetase, class Ia, editing domain; IPR009080: Aminoacyl-tRNA synthetase, class 1a, anticodon-binding; IPR010978: tRNA-binding arm; IPR013155: Valyl/Leucyl/Isoleucyl-tRNA synthetase, class I, anticodon-binding; IP…	GI21262 [Drosophila mojavensis] >gi|193911862|gb|EDW10729.1| GI21262 [Drosophila mojavensis]	TSA: Spodoptera littoralis CL1188Contig1.Spli mRNA sequence
AK385623|e10027N16	117	15	0	0	2.96347	Valyl-tRNA synthetase OS=Rattus norvegicus GN=Vars PE=2 SV=2	GI21262 GN=GI21262 OS=Drosophila mojavensis (Fruit fly) PE=3 SV=1	IPR001412: Aminoacyl-tRNA synthetase, class I, conserved site; IPR002300: Aminoacyl-tRNA synthetase, class Ia; IPR002303: Valyl-tRNA synthetase; IPR009008: Valyl/Leucyl/Isoleucyl-tRNA synthetase, class Ia, editing domain; IPR009080: Aminoacyl-tRNA synthetase, class 1a, anticodon-binding; IPR010978: tRNA-binding arm; IPR013155: Valyl/Leucyl/Isoleucyl-tRNA synthetase, class I, anticodon-binding; IP…	GI21262 [Drosophila mojavensis] >gi|193911862|gb|EDW10729.1| GI21262 [Drosophila mojavensis]	TSA: Spodoptera littoralis CL1188Contig1.Spli mRNA sequence
gnl|UG|Bmo#S32366609	407	53	0	0	2.94096	--	--	--	--	Plasmodium falciparum 3D7 chromosome 11, complete sequence
AK385861|fphe11L17	107	14	0	0	2.93411	Regucalcin OS=Xenopus laevis GN=rgn PE=2 SV=1	Luciferin regenerating enzyme GN=KGM_05836 OS=Danaus plexippus (Monarch butterfly) PE=4 SV=1	IPR005511: Senescence marker protein-30 (SMP-30); IPR008367: Regucalcin; IPR011042: Six-bladed beta-propeller, TolB-like; IPR013658: SMP-30/Gluconolaconase/LRE-like region	luciferin regenerating enzyme [Lampyris turkestanicus]	--
gnl|UG|Bmo#S58875410	107	14	0	0	2.93411	Regucalcin OS=Xenopus laevis GN=rgn PE=2 SV=1	Luciferin regenerating enzyme GN=KGM_05836 OS=Danaus plexippus (Monarch butterfly) PE=4 SV=1	IPR005511: Senescence marker protein-30 (SMP-30); IPR008367: Regucalcin; IPR011042: Six-bladed beta-propeller, TolB-like; IPR013658: SMP-30/Gluconolaconase/LRE-like region	luciferin regenerating enzyme [Lampyris turkestanicus]	--
BGIBMGA007230-TA	206	27	0	0	2.93161	Eukaryotic peptide chain release factor GTP-binding subunit ERF3A OS=Mus musculus GN=Gspt1 PE=1 SV=1	Elongation factor 1 alpha OS=Bombyx mori (Silk moth) PE=2 SV=1	IPR000795: Protein synthesis factor, GTP-binding; IPR003285: Yeast eukaryotic release factor; IPR004160: Translation elongation factor EFTu/EF1A, C-terminal; IPR004161: Translation elongation factor EFTu/EF1A, domain 2; IPR009000: Translation elongation/initiation factor/Ribosomal, beta-barrel; IPR009001: Translation elongation factor EF1A/initiation factor IF2gamma, C-terminal; IPR009818: Ataxin…	Ef1alpha-like factor isoform 1 [Bombyx mori] >gi|87248115|gb|ABD36110.1| elongation factor 1 alpha [Bombyx mori]	Bombyx mori Ef1alpha-like factor (Elf), transcript variant 1, mRNA >gi|87248114|gb|DQ311165.1| Bombyx mori elongation factor 1 alpha mRNA, complete cds
gnl|UG|Bmo#S58876637	129	17	0	0	2.92376	Neutral alpha-glucosidase AB OS=Sus scrofa GN=GANAB PE=1 SV=1	Putative uncharacterized protein GN=KGM_05737 OS=Danaus plexippus (Monarch butterfly) PE=4 SV=1	IPR000322: Glycoside hydrolase, family 31; IPR011013: Glycoside hydrolase-type carbohydrate-binding; IPR017853: Glycoside hydrolase, superfamily	PREDICTED: similar to CG14476 CG14476-PB [Tribolium castaneum] >gi|270003604|gb|EFA00052.1| hypothetical protein TcasGA2_TC002860 [Tribolium castaneum]	Ixodes scapularis glucosidase II, putative, mRNA
AK384061|fcaL06C23	129	17	0	0	2.92376	Neutral alpha-glucosidase AB OS=Sus scrofa GN=GANAB PE=1 SV=1	Putative uncharacterized protein GN=KGM_05737 OS=Danaus plexippus (Monarch butterfly) PE=4 SV=1	IPR000322: Glycoside hydrolase, family 31; IPR011013: Glycoside hydrolase-type carbohydrate-binding; IPR017853: Glycoside hydrolase, superfamily	PREDICTED: similar to CG14476 CG14476-PB [Tribolium castaneum] >gi|270003604|gb|EFA00052.1| hypothetical protein TcasGA2_TC002860 [Tribolium castaneum]	Ixodes scapularis glucosidase II, putative, mRNA
gnl|UG|Bmo#S18527155	461	61	0	0	2.91789	Tubulin beta-1 chain OS=Manduca sexta PE=2 SV=1	Beta-tubulin GN=bmtub1 OS=Bombyx mori (Silk moth) PE=2 SV=1	IPR000217: Tubulin; IPR002453: Beta tubulin; IPR003008: Tubulin/FtsZ, GTPase domain; IPR008280: Tubulin/FtsZ, C-terminal; IPR017975: Tubulin, conserved site; IPR018316: Tubulin/FtsZ, 2-layer sandwich domain; IPR023123: Tubulin, C-terminal	beta-tubulin [Bombyx mori] >gi|19773426|dbj|BAB86852.1| beta-tubulin [Bombyx mori]	Bombyx mori beta-tubulin (Tub1), mRNA >gi|19773425|dbj|AB072307.1| Bombyx mori bmtub1 mRNA for beta-tubulin, complete cds
gnl|UG|Bmo#S33890086	204	27	0	0	2.91754	Eukaryotic translation initiation factor 5 OS=Drosophila melanogaster GN=eIF5 PE=1 SV=1	Eukaryotic translation initiation factor 5 OS=Bombyx mori (Silk moth) PE=2 SV=1	IPR002735: Translation initiation factor IF2/IF5; IPR003307: eIF4-gamma/eIF5/eIF2-epsilon; IPR016021: MIF4-like, type 1/2/3; IPR016024: Armadillo-type fold; IPR016189: Translation initiation factor IF2/IF5, N-terminal; IPR016190: Translation initiation factor IF2/IF5, zinc-binding	eukaryotic translation initiation factor 5 [Bombyx mori] >gi|110175064|gb|ABG54290.1| eukaryotic translation initiation factor 5 [Bombyx mori]	Bombyx mori eukaryotic translation initiation factor 5 (LOC733088), mRNA >gi|110175063|gb|DQ645462.1| Bombyx mori eukaryotic translation initiation factor 5 mRNA, complete cds
gnl|UG|Bmo#S58875863	166	22	0	0	2.91561	--	Putative uncharacterized protein GN=KGM_04943 OS=Danaus plexippus (Monarch butterfly) PE=4 SV=1	--	hypothetical protein Y50E8A.g - Caenorhabditis elegans	--
AK387780|bmte13L03	166	22	0	0	2.91561	--	Putative uncharacterized protein GN=KGM_04943 OS=Danaus plexippus (Monarch butterfly) PE=4 SV=1	--	hypothetical protein Y50E8A.g - Caenorhabditis elegans	--
AK384111|fcaL08B15_K01268	422	56	0	0	2.91374	Tubulin beta-1 chain OS=Manduca sexta PE=2 SV=1	Beta-tubulin GN=bmtub1 OS=Bombyx mori (Silk moth) PE=2 SV=1	IPR000217: Tubulin; IPR002453: Beta tubulin; IPR003008: Tubulin/FtsZ, GTPase domain; IPR008280: Tubulin/FtsZ, C-terminal; IPR017975: Tubulin, conserved site; IPR018316: Tubulin/FtsZ, 2-layer sandwich domain; IPR023123: Tubulin, C-terminal	beta-tubulin [Bombyx mori] >gi|19773426|dbj|BAB86852.1| beta-tubulin [Bombyx mori]	Bombyx mori beta-tubulin (Tub1), mRNA >gi|19773425|dbj|AB072307.1| Bombyx mori bmtub1 mRNA for beta-tubulin, complete cds
gnl|UG|Bmo#S58875183	113	15	0	0	2.91329	FAM203 family protein CG6073 OS=Drosophila melanogaster GN=CG6073 PE=1 SV=2	Putative uncharacterized protein GN=KGM_03701 OS=Danaus plexippus (Monarch butterfly) PE=4 SV=1	IPR007205: Uncharacterised domain UPF0507; IPR007206: Uncharacterised domain UPF0507, C-terminal; IPR011989: Armadillo-like helical; IPR016024: Armadillo-type fold	PREDICTED: similar to conserved hypothetical protein [Nasonia vitripennis]	--
AK384127|fcaL08I24_K00642	113	15	0	0	2.91329	FAM203 family protein CG6073 OS=Drosophila melanogaster GN=CG6073 PE=1 SV=2	Putative uncharacterized protein GN=KGM_03701 OS=Danaus plexippus (Monarch butterfly) PE=4 SV=1	IPR007205: Uncharacterised domain UPF0507; IPR007206: Uncharacterised domain UPF0507, C-terminal; IPR011989: Armadillo-like helical; IPR016024: Armadillo-type fold	PREDICTED: similar to conserved hypothetical protein [Nasonia vitripennis]	--
AK378365|fmgV34J02_K00042	128	17	0	0	2.91254	Diphosphoinositol polyphosphate phosphohydrolase 2 OS=Pongo abelii GN=NUDT4 PE=2 SV=1	Putative uncharacterized protein GN=KGM_15106 OS=Danaus plexippus (Monarch butterfly) PE=3 SV=1	IPR000086: NUDIX hydrolase domain; IPR015797: NUDIX hydrolase domain-like; IPR020084: NUDIX hydrolase, conserved site	diadenosine and diphosphoinositol polyphosphate phosphohydrolase [Glossina morsitans morsitans]	Bombyx mori DNA, chromosome 11, clone:559G11, complete sequence
gnl|UG|Bmo#S58871392	120	16	0	0	2.90689	S-formylglutathione hydrolase OS=Sus scrofa GN=ESD PE=2 SV=1	S-formylglutathione hydrolase GN=KGM_14245 OS=Danaus plexippus (Monarch butterfly) PE=4 SV=1	IPR000801: Putative esterase; IPR014186: S-formylglutathione hydrolase	hypothetical protein DAPPUDRAFT_51985 [Daphnia pulex]	TSA: Striacosta albicosta stalb_01_00016778 mRNA sequence
AK383400|MFB-04L18	120	16	0	0	2.90689	S-formylglutathione hydrolase OS=Sus scrofa GN=ESD PE=2 SV=1	S-formylglutathione hydrolase GN=KGM_14245 OS=Danaus plexippus (Monarch butterfly) PE=4 SV=1	IPR000801: Putative esterase; IPR014186: S-formylglutathione hydrolase	hypothetical protein DAPPUDRAFT_51985 [Daphnia pulex]	TSA: Striacosta albicosta stalb_01_00016778 mRNA sequence
gnl|UG|Bmo#S23905523	440	59	0	0	2.89872	Cytochrome b OS=Samia cynthia ricini GN=MT-CYB PE=3 SV=1	Cytochrome b GN=CYTB OS=Bombyx mori (Silk moth) PE=3 SV=1	IPR005797: Cytochrome b/b6, N-terminal; IPR005798: Cytochrome b/b6, C-terminal; IPR016174: Di-haem cytochrome, transmembrane; IPR016175: Cytochrome b/b6	cytochrome b [Bombyx mori]	Bombyx mori isolate C108 mitochondrion, complete genome
BGIBMGA002570-TA	164	22	0	0	2.89812	Dolichyl-diphosphooligosaccharide--protein glycosyltransferase subunit 1 OS=Macaca fascicularis GN=RPN1 PE=2 SV=1	Olygosaccharyltransferase alpha subunit OS=Aedes aegypti (Yellowfever mosquito) PE=2 SV=1	IPR007676: Ribophorin I	olygosaccharyltransferase alpha subunit [Aedes aegypti]	TSA: Striacosta albicosta stalb_01_00001915 mRNA sequence
AK383913|MFB-26O24	461	62	0	0	2.89443	Tubulin beta-1 chain OS=Manduca sexta PE=2 SV=1	Beta-tubulin GN=bmtub1 OS=Bombyx mori (Silk moth) PE=2 SV=1	IPR000217: Tubulin; IPR002453: Beta tubulin; IPR003008: Tubulin/FtsZ, GTPase domain; IPR008280: Tubulin/FtsZ, C-terminal; IPR017975: Tubulin, conserved site; IPR018316: Tubulin/FtsZ, 2-layer sandwich domain; IPR023123: Tubulin, C-terminal	beta-tubulin [Bombyx mori] >gi|19773426|dbj|BAB86852.1| beta-tubulin [Bombyx mori]	Bombyx mori beta-tubulin (Tub1), mRNA >gi|19773425|dbj|AB072307.1| Bombyx mori bmtub1 mRNA for beta-tubulin, complete cds
AK381940|fdpe01J22	237	32	0	0	2.88874	Eukaryotic translation initiation factor 1A, X-chromosomal OS=Pongo abelii GN=EIF1AX PE=2 SV=3	Eukaryotic translation initiation factor 1A OS=Bombyx mori (Silk moth) PE=2 SV=1	IPR001253: Translation initiation factor 1A (eIF-1A); IPR006196: RNA-binding domain, S1, IF1 type; IPR012340: Nucleic acid-binding, OB-fold; IPR016027: Nucleic acid-binding, OB-fold-like; IPR018104: Translation initiation factor 1A (eIF-1A), conserved site	eukaryotic translation initiation factor 1A [Bombyx mori] >gi|87248491|gb|ABD36298.1| eukaryotic translation initiation factor 1A [Bombyx mori]	Bombyx mori eukaryotic translation initiation factor 1A (LOC100101157), mRNA >gi|87248490|gb|DQ311354.1| Bombyx mori eukaryotic translation initiation factor 1A mRNA, complete cds
AK383329|MFB-02G14	118	16	0	0	2.88264	Dolichyl-diphosphooligosaccharide--protein glycosyltransferase subunit 2 OS=Bos taurus GN=RPN2 PE=2 SV=1	Putative ribophorin ii GN=KGM_18299 OS=Danaus plexippus (Monarch butterfly) PE=4 SV=1	IPR008814: Ribophorin II	GJ20114 [Drosophila virilis] >gi|194145398|gb|EDW61794.1| GJ20114 [Drosophila virilis]	Bombyx mori genomic DNA, chromosome 17, BAC clone:517G19, complete sequence
gnl|UG|Bmo#S58871463	118	16	0	0	2.88264	Dolichyl-diphosphooligosaccharide--protein glycosyltransferase subunit 2 OS=Bos taurus GN=RPN2 PE=2 SV=1	Putative ribophorin ii GN=KGM_18299 OS=Danaus plexippus (Monarch butterfly) PE=4 SV=1	IPR008814: Ribophorin II	GJ20114 [Drosophila virilis] >gi|194145398|gb|EDW61794.1| GJ20114 [Drosophila virilis]	Bombyx mori genomic DNA, chromosome 17, BAC clone:517G19, complete sequence
AK377644|fe8d12D21_K01390	184	25	0	0	2.87971	--	Putative uncharacterized protein GN=KGM_09480 OS=Danaus plexippus (Monarch butterfly) PE=4 SV=1	--	hypothetical protein TcasGA2_TC002510 [Tribolium castaneum]	TSA: Spodoptera littoralis CL1769Contig1.Spli mRNA sequence
gnl|UG|Bmo#S58879652	184	25	0	0	2.87971	--	Putative uncharacterized protein GN=KGM_09480 OS=Danaus plexippus (Monarch butterfly) PE=4 SV=1	--	hypothetical protein TcasGA2_TC002510 [Tribolium castaneum]	TSA: Spodoptera littoralis CL1769Contig1.Spli mRNA sequence
AK381922|fdpe01C04	125	17	0	0	2.87832	SUMO-conjugating enzyme UBC9-A OS=Danio rerio GN=ube2ia PE=1 SV=1	Ubiquitin-conjugating enzyme E2 isoform 1 OS=Bombyx mori (Silk moth) PE=2 SV=1	IPR000608: Ubiquitin-conjugating enzyme, E2; IPR016135: Ubiquitin-conjugating enzyme/RWD-like; IPR023313: Ubiquitin-conjugating enzyme, active site	ubiquitin-conjugating enzyme E2 [Bombyx mori] >gi|95102776|gb|ABF51329.1| ubiquitin-conjugating enzyme E2 isoform 1 [Bombyx mori]	Bombyx mori ubiquitin-conjugating enzyme E2 (LOC732943), mRNA >gi|95102775|gb|DQ443240.1| Bombyx mori ubiquitin-conjugating enzyme E2 isoform 1 mRNA, complete cds
BGIBMGA014580-TA	125	17	0	0	2.87832	Histone H4 OS=Tigriopus californicus GN=His4 PE=3 SV=2	Histone H4 OS=Anopheles gambiae str. PEST PE=3 SV=4	IPR001951: Histone H4; IPR004823: TATA box binding protein associated factor (TAF); IPR007125: Histone core; IPR009072: Histone-fold; IPR019809: Histone H4, conserved site	histone H4 replacement, isoform C [Drosophila melanogaster] >gi|24585675|ref|NP_724344.1| histone H4 [Drosophila melanogaster] >gi|24646873|ref|NP_731927.1| histone H4 replacement, isoform A [Drosophila melanogaster] >gi|24646875|ref|NP_731928.1| histone H4 replacement, isoform B [Drosophila melanogaster] >gi|78706958|ref|NP_001027284.1| histone H4 [Drosophila melanogaster] >gi|78706966|ref|NP_00…
AK378469|fmgV44N22_K01526	183	25	0	0	2.87184	Serine/arginine-rich splicing factor 2 OS=Rattus norvegicus GN=Srsf2 PE=1 SV=3	Sr protein OS=Bombyx mori (Silk moth) PE=2 SV=1	IPR000504: RNA recognition motif domain; IPR012677: Nucleotide-binding, alpha-beta plait	Sr protein [Bombyx mori] >gi|87248221|gb|ABD36163.1| Sr protein [Bombyx mori]	Bombyx mori Sr protein (LOC692842), mRNA >gi|87248220|gb|DQ311218.1| Bombyx mori Sr protein mRNA, complete cds
BGIBMGA013498-TA	124	17	0	0	2.86673	Dolichyl-diphosphooligosaccharide--protein glycosyltransferase subunit 2 OS=Bos taurus GN=RPN2 PE=2 SV=1	Putative ribophorin ii GN=KGM_18299 OS=Danaus plexippus (Monarch butterfly) PE=4 SV=1	IPR008814: Ribophorin II	GJ20114 [Drosophila virilis] >gi|194145398|gb|EDW61794.1| GJ20114 [Drosophila virilis]	Bombyx mori genomic DNA, chromosome 17, BAC clone:517G19, complete sequence
BGIBMGA006360-TA	102	14	0	0	2.86507	Trans-Golgi network integral membrane protein 2 OS=Homo sapiens GN=TGOLN2 PE=1 SV=2	Putative uncharacterized protein GN=KGM_13117 OS=Danaus plexippus (Monarch butterfly) PE=4 SV=1	--	Trans-Golgi network integral membrane protein 2 [Harpegnathos saltator]	--
gnl|UG|Bmo#S46623043	182	25	0	0	2.86394	Serine/arginine-rich splicing factor 2 OS=Rattus norvegicus GN=Srsf2 PE=1 SV=3	Sr protein OS=Bombyx mori (Silk moth) PE=2 SV=1	IPR000504: RNA recognition motif domain; IPR012677: Nucleotide-binding, alpha-beta plait	Sr protein [Bombyx mori] >gi|87248221|gb|ABD36163.1| Sr protein [Bombyx mori]	Bombyx mori Sr protein (LOC692842), mRNA >gi|87248220|gb|DQ311218.1| Bombyx mori Sr protein mRNA, complete cds
gnl|UG|Bmo#S55943240	575	79	0	0	2.86364	Voltage-dependent anion-selective channel OS=Drosophila melanogaster GN=porin PE=1 SV=3	Putative voltage-dependent anion-selective channel isoform 1 GN=KGM_22196 OS=Danaus plexippus (Monarch butterfly) PE=4 SV=1	IPR001925: Porin, eukaryotic type	PREDICTED: similar to voltage-dependent anion-selective channel isoform 2 [Tribolium castaneum]	TSA: Spodoptera littoralis CL1Contig342.Spli mRNA sequence
gnl|UG|Bmo#S32890890	130	18	0	0	2.85244	SUMO-conjugating enzyme UBC9-A OS=Danio rerio GN=ube2ia PE=1 SV=1	Ubiquitin-conjugating enzyme E2 isoform 1 OS=Bombyx mori (Silk moth) PE=2 SV=1	IPR000608: Ubiquitin-conjugating enzyme, E2; IPR016135: Ubiquitin-conjugating enzyme/RWD-like; IPR023313: Ubiquitin-conjugating enzyme, active site	ubiquitin-conjugating enzyme E2 [Bombyx mori] >gi|95102776|gb|ABF51329.1| ubiquitin-conjugating enzyme E2 isoform 1 [Bombyx mori]	Bombyx mori ubiquitin-conjugating enzyme E2 isoform 2 mRNA, complete cds
gnl|UG|Bmo#S50900143	296	41	0	0	2.8519	Alaserpin OS=Manduca sexta PE=1 SV=1	Serpin-24 (Fragment) OS=Bombyx mori (Silk moth) PE=2 SV=1	IPR023796: Serpin domain	serpin-24 [Bombyx mori]	Bombyx mori serpin-24 mRNA, partial cds
BGIBMGA006828-TA	101	14	0	0	2.85086	tRNA-splicing ligase RtcB homolog OS=Drosophila melanogaster GN=CG9987 PE=2 SV=1	Putative uncharacterized protein GN=KGM_11149 OS=Danaus plexippus (Monarch butterfly) PE=4 SV=1	IPR001233: Uncharacterised protein family UPF0027	PREDICTED: similar to GA22169-PA [Tribolium castaneum] >gi|270012976|gb|EFA09424.1| hypothetical protein TcasGA2_TC010635 [Tribolium castaneum]	TSA: Apis mellifera isotig20091.Amelova mRNA sequence
AK377868|fe8d46K13_K01661	100	14	0	0	2.8365	Selenide, water dikinase OS=Drosophila melanogaster GN=SelD PE=1 SV=1	Selenophosphate synthetase GN=sps1 OS=Bombyx mori (Silk moth) PE=2 SV=1	IPR000728: AIR synthase-related protein; IPR004536: Selenide water dikinase; IPR010918: AIR synthase-related protein, C-terminal; IPR016188: PurM, N-terminal-like	selenophosphate synthetase 1 [Bombyx mori] >gi|76496248|gb|ABA43640.1| selenophosphate synthetase [Bombyx mori]	Bombyx mori selenophosphate synthetase 1 (Sps1), mRNA >gi|89892494|gb|DQ202318.2| Bombyx mori selenophosphate synthetase (sps1) mRNA, complete cds
BGIBMGA008226-TA	178	25	0	0	2.83188	Eukaryotic translation initiation factor 5 OS=Drosophila melanogaster GN=eIF5 PE=1 SV=1	Eukaryotic translation initiation factor 5 OS=Bombyx mori (Silk moth) PE=2 SV=1	IPR002735: Translation initiation factor IF2/IF5; IPR003307: eIF4-gamma/eIF5/eIF2-epsilon; IPR016021: MIF4-like, type 1/2/3; IPR016024: Armadillo-type fold; IPR016189: Translation initiation factor IF2/IF5, N-terminal; IPR016190: Translation initiation factor IF2/IF5, zinc-binding	eukaryotic translation initiation factor 5 [Bombyx mori] >gi|110175064|gb|ABG54290.1| eukaryotic translation initiation factor 5 [Bombyx mori]	Bombyx mori eukaryotic translation initiation factor 5 (LOC733088), mRNA >gi|110175063|gb|DQ645462.1| Bombyx mori eukaryotic translation initiation factor 5 mRNA, complete cds
gnl|UG|Bmo#S32345408	582	82	0	0	2.82732	Putative protein TPRXL OS=Homo sapiens GN=TPRXL PE=5 SV=2	Putative uncharacterized protein GN=TTHERM_00998970 OS=Tetrahymena thermophila (strain SB210) PE=4 SV=2	--	hypothetical protein TTHERM_00998970 [Tetrahymena thermophila] >gi|146143194|gb|EAR83245.2| hypothetical protein TTHERM_00998970 [Tetrahymena thermophila SB210]	--
BGIBMGA001748-TA	113	16	0	0	2.82018	FAM203 family protein CG6073 OS=Drosophila melanogaster GN=CG6073 PE=1 SV=2	Putative uncharacterized protein GN=KGM_03701 OS=Danaus plexippus (Monarch butterfly) PE=4 SV=1	IPR007205: Uncharacterised domain UPF0507; IPR007206: Uncharacterised domain UPF0507, C-terminal; IPR011989: Armadillo-like helical; IPR016024: Armadillo-type fold	PREDICTED: similar to conserved hypothetical protein [Nasonia vitripennis]	--
AK386364|fprW04E14	501	71	0	0	2.81892	Protein extra bases OS=Drosophila melanogaster GN=exba PE=1 SV=1	Eukaryotic initiation factor 5C OS=Bombyx mori (Silk moth) PE=2 SV=1	IPR003307: eIF4-gamma/eIF5/eIF2-epsilon; IPR016021: MIF4-like, type 1/2/3; IPR016024: Armadillo-type fold	eukaryotic initiation factor 5C [Bombyx mori] >gi|116272493|gb|ABJ97182.1| eukaryotic initiation factor 5C [Bombyx mori]	Bombyx mori eukaryotic initiation factor 5C (LOC778502), mRNA >gi|116272492|gb|DQ985592.1| Bombyx mori clone 001_001425_2005-04-13_WD-050413 eukaryotic initiation factor 5C mRNA, complete cds
gnl|UG|Bmo#S58872940	501	71	0	0	2.81892	Protein extra bases OS=Drosophila melanogaster GN=exba PE=1 SV=1	Eukaryotic initiation factor 5C OS=Bombyx mori (Silk moth) PE=2 SV=1	IPR003307: eIF4-gamma/eIF5/eIF2-epsilon; IPR016021: MIF4-like, type 1/2/3; IPR016024: Armadillo-type fold	eukaryotic initiation factor 5C [Bombyx mori] >gi|116272493|gb|ABJ97182.1| eukaryotic initiation factor 5C [Bombyx mori]	Bombyx mori eukaryotic initiation factor 5C (LOC778502), mRNA >gi|116272492|gb|DQ985592.1| Bombyx mori clone 001_001425_2005-04-13_WD-050413 eukaryotic initiation factor 5C mRNA, complete cds
gnl|UG|Bmo#S58872571	162	23	0	0	2.81629	Eukaryotic translation initiation factor 2 subunit 3 OS=Drosophila melanogaster GN=Su(var)3-9 PE=2 SV=1	Translation initiation factor 2 gamma subunit GN=eIF2g OS=Bombyx mori (Silk moth) PE=2 SV=1	IPR000795: Protein synthesis factor, GTP-binding; IPR004161: Translation elongation factor EFTu/EF1A, domain 2; IPR009000: Translation elongation/initiation factor/Ribosomal, beta-barrel; IPR009001: Translation elongation factor EF1A/initiation factor IF2gamma, C-terminal; IPR015256: Translation initiation factor 2, gamma subunit, C-terminal	translation initiation factor 2 gamma subunit [Bombyx mori] >gi|51965708|emb|CAG29676.1| translation initiation factor 2 gamma subunit [Bombyx mori]	Bombyx mori translation initiation factor 2 gamma subunit (Eif2g), mRNA >gi|51965707|emb|AJ715870.1| Bombyx mori mRNA for eukaryotic translation initiation factor 2 gamma subunit (eIF2g gene)
AK386533|fprW12L02	162	23	0	0	2.81629	Eukaryotic translation initiation factor 2 subunit 3 OS=Drosophila melanogaster GN=Su(var)3-9 PE=2 SV=1	Translation initiation factor 2 gamma subunit GN=eIF2g OS=Bombyx mori (Silk moth) PE=2 SV=1	IPR000795: Protein synthesis factor, GTP-binding; IPR004161: Translation elongation factor EFTu/EF1A, domain 2; IPR009000: Translation elongation/initiation factor/Ribosomal, beta-barrel; IPR009001: Translation elongation factor EF1A/initiation factor IF2gamma, C-terminal; IPR015256: Translation initiation factor 2, gamma subunit, C-terminal	translation initiation factor 2 gamma subunit [Bombyx mori] >gi|51965708|emb|CAG29676.1| translation initiation factor 2 gamma subunit [Bombyx mori]	Bombyx mori translation initiation factor 2 gamma subunit (Eif2g), mRNA >gi|51965707|emb|AJ715870.1| Bombyx mori mRNA for eukaryotic translation initiation factor 2 gamma subunit (eIF2g gene)
gnl|UG|Bmo#S58872969	154	22	0	0	2.80735	Eukaryotic initiation factor 4A-III OS=Rattus norvegicus GN=Eif4a3 PE=1 SV=1	EIF4AIII protein OS=Bombyx mori (Silk moth) PE=2 SV=1	IPR000629: RNA helicase, ATP-dependent, DEAD-box, conserved site; IPR001650: Helicase, C-terminal; IPR011545: DNA/RNA helicase, DEAD/DEAH box type, N-terminal; IPR014001: DEAD-like helicase; IPR014014: RNA helicase, DEAD-box type, Q motif	eukaryotic initiation factor 4A-III [Bombyx mori] >gi|110376569|gb|ABG73410.1| eIF4AIII protein [Bombyx mori]	Bombyx mori eukaryotic initiation factor 4A-III (eIF4AIII), mRNA >gi|110376568|gb|DQ667967.1| Bombyx mori eIF4AIII protein mRNA, complete cds
AK386335|fprW03C13	154	22	0	0	2.80735	Eukaryotic initiation factor 4A-III OS=Rattus norvegicus GN=Eif4a3 PE=1 SV=1	EIF4AIII protein OS=Bombyx mori (Silk moth) PE=2 SV=1	IPR000629: RNA helicase, ATP-dependent, DEAD-box, conserved site; IPR001650: Helicase, C-terminal; IPR011545: DNA/RNA helicase, DEAD/DEAH box type, N-terminal; IPR014001: DEAD-like helicase; IPR014014: RNA helicase, DEAD-box type, Q motif	eukaryotic initiation factor 4A-III [Bombyx mori] >gi|110376569|gb|ABG73410.1| eIF4AIII protein [Bombyx mori]	Bombyx mori eukaryotic initiation factor 4A-III (eIF4AIII), mRNA >gi|110376568|gb|DQ667967.1| Bombyx mori eIF4AIII protein mRNA, complete cds
BGIBMGA003972-TA	111	16	0	0	2.79442	Selenide, water dikinase OS=Drosophila melanogaster GN=SelD PE=1 SV=1	Selenophosphate synthetase GN=sps1 OS=Bombyx mori (Silk moth) PE=2 SV=1	IPR000728: AIR synthase-related protein; IPR004536: Selenide water dikinase; IPR010918: AIR synthase-related protein, C-terminal; IPR016188: PurM, N-terminal-like	selenophosphate synthetase 1 [Bombyx mori] >gi|76496248|gb|ABA43640.1| selenophosphate synthetase [Bombyx mori]	Bombyx mori selenophosphate synthetase 1 (Sps1), mRNA >gi|89892494|gb|DQ202318.2| Bombyx mori selenophosphate synthetase (sps1) mRNA, complete cds
gnl|UG|Bmo#S58871785	150	22	0	0	2.76939	Eukaryotic translation initiation factor 2 subunit 1 OS=Drosophila melanogaster GN=eIF-2alpha PE=1 SV=1	Eukaryotic translation initiation factor 2 alpha subunit OS=Bombyx mori (Silk moth) PE=2 SV=1	IPR003029: Ribosomal protein S1, RNA-binding domain; IPR011488: Translation initiation factor 2, alpha subunit; IPR012340: Nucleic acid-binding, OB-fold; IPR016027: Nucleic acid-binding, OB-fold-like; IPR022967: RNA-binding domain, S1; IPR024054: Translation initiation factor 2, alpha subunit, middle domain; IPR024055: Translation initiation factor 2, alpha subunit, C-terminal	eukaryotic translation initiation factor 2 alpha subunit [Bombyx mori] >gi|66736329|gb|AAY54260.1| eukaryotic translation initiation factor 2 alpha subunit [Bombyx mori]	Bombyx mori eukaryotic translation initiation factor 2 alpha subunit (LOC693063), mRNA >gi|66736328|gb|DQ073458.1| Bombyx mori eukaryotic translation initiation factor 2 alpha subunit mRNA, complete cds
AK384846|fcaL40L17	150	22	0	0	2.76939	Eukaryotic translation initiation factor 2 subunit 1 OS=Drosophila melanogaster GN=eIF-2alpha PE=1 SV=1	Eukaryotic translation initiation factor 2 alpha subunit OS=Bombyx mori (Silk moth) PE=2 SV=1	IPR003029: Ribosomal protein S1, RNA-binding domain; IPR011488: Translation initiation factor 2, alpha subunit; IPR012340: Nucleic acid-binding, OB-fold; IPR016027: Nucleic acid-binding, OB-fold-like; IPR022967: RNA-binding domain, S1; IPR024054: Translation initiation factor 2, alpha subunit, middle domain; IPR024055: Translation initiation factor 2, alpha subunit, C-terminal	eukaryotic translation initiation factor 2 alpha subunit [Bombyx mori] >gi|66736329|gb|AAY54260.1| eukaryotic translation initiation factor 2 alpha subunit [Bombyx mori]	Bombyx mori eukaryotic translation initiation factor 2 alpha subunit (LOC693063), mRNA >gi|66736328|gb|DQ073458.1| Bombyx mori eukaryotic translation initiation factor 2 alpha subunit mRNA, complete cds
gnl|UG|Bmo#S58875135	1458	214	0	0	2.76831	Cytochrome c oxidase subunit 3 OS=Drosophila melanogaster GN=mt:CoIII PE=3 SV=1	Cytochrome c oxidase subunit 3 GN=COX3 OS=Bombyx mori (Silk moth) PE=3 SV=1	IPR000298: Cytochrome c oxidase, subunit III; IPR013833: Cytochrome c oxidase, subunit III, 4-helical bundle	cytochrome c oxidase subunit III [Bombyx mori] >gi|8163624|gb|AAF73769.1|AF149768_13 cytochrome oxidase subunit III [Bombyx mori] >gi|15213113|gb|AAK85723.1| cytochrome oxidase subunit III [Bombyx mori] >gi|18640075|dbj|BAB84666.1| cytochrome c oxidase subunit 3 [Bombyx mori] >gi|20126720|dbj|BAB88896.1| cytochrome oxidase subunit III [Bombyx mori] >gi|91178397|gb|ABE27663.1| cytochrome oxidase s…	Bombyx mori isolate C108 mitochondrion, complete genome
AK381522|fufe51O21	189	28	0	0	2.75489	Eukaryotic translation initiation factor 1A, X-chromosomal OS=Pongo abelii GN=EIF1AX PE=2 SV=3	Eukaryotic translation initiation factor 1A OS=Bombyx mori (Silk moth) PE=2 SV=1	IPR001253: Translation initiation factor 1A (eIF-1A); IPR006196: RNA-binding domain, S1, IF1 type; IPR012340: Nucleic acid-binding, OB-fold; IPR016027: Nucleic acid-binding, OB-fold-like; IPR018104: Translation initiation factor 1A (eIF-1A), conserved site	eukaryotic translation initiation factor 1A [Bombyx mori] >gi|87248491|gb|ABD36298.1| eukaryotic translation initiation factor 1A [Bombyx mori]	Bombyx mori eukaryotic translation initiation factor 1A (LOC100101157), mRNA >gi|87248490|gb|DQ311354.1| Bombyx mori eukaryotic translation initiation factor 1A mRNA, complete cds
BGIBMGA011500-TA	128	19	0	0	2.75207	Eukaryotic translation initiation factor 2 subunit 3 OS=Drosophila melanogaster GN=Su(var)3-9 PE=2 SV=1	Putative heterochromatin protein isoform 2 GN=KGM_18698 OS=Danaus plexippus (Monarch butterfly) PE=3 SV=1	IPR000795: Protein synthesis factor, GTP-binding; IPR001214: SET domain; IPR004161: Translation elongation factor EFTu/EF1A, domain 2; IPR007728: Pre-SET domain; IPR009000: Translation elongation/initiation factor/Ribosomal, beta-barrel; IPR009001: Translation elongation factor EF1A/initiation factor IF2gamma, C-terminal; IPR015256: Translation initiation factor 2, gamma subunit, C-terminal	PREDICTED: similar to heterochromatin protein isoform 2 [Tribolium castaneum]	Bombyx mori translation initiation factor 2 gamma subunit (Eif2g), mRNA >gi|51965707|emb|AJ715870.1| Bombyx mori mRNA for eukaryotic translation initiation factor 2 gamma subunit (eIF2g gene)
AK378741|fner32J23_K00591	684	102	0	0	2.74543	Ecdysteroid-regulated 16 kDa protein OS=Manduca sexta GN=ESR16 PE=2 SV=1	Ecdysteroid-regulated 16 kDa protein OS=Bombyx mori (Silk moth) PE=2 SV=1	IPR003172: MD-2-related lipid-recognition; IPR014756: Immunoglobulin E-set	ecdysteroid-regulated 16 kDa protein precursor [Bombyx mori] >gi|87248319|gb|ABD36212.1| ecdysteroid-regulated 16 kDa protein precursor [Bombyx mori]	Bombyx mori ecdysteroid-regulated 16 kDa protein precursor (LOC100101154), mRNA >gi|87248318|gb|DQ311267.1| Bombyx mori ecdysteroid-regulated 16 kDa protein precursor, mRNA, complete cds
gnl|UG|Bmo#S58871672	248	37	0	0	2.74474	Signal recognition particle 54 kDa protein OS=Pongo abelii GN=SRP54 PE=2 SV=1	Putative signal recognition particle 54 kDa protein GN=SRP54 OS=Bombyx mori (Silk moth) PE=2 SV=1	IPR000897: Signal recognition particle, SRP54 subunit, GTPase; IPR003593: ATPase, AAA+ type, core; IPR004125: Signal recognition particle, SRP54 subunit, M-domain; IPR006325: Signal recognition particle, SRP54 subunit; IPR013822: Signal recognition particle, SRP54 subunit, helical bundle	putative signal recognition particle 54 kDa protein [Bombyx mori] >gi|111608119|gb|ABH10803.1| putative signal recognition particle 54 kDa protein [Bombyx mori]	Bombyx mori signal recognition particle 54 kDa protein-like (Srp54), mRNA >gi|111608118|gb|DQ646413.1| Bombyx mori putative signal recognition particle 54 kDa protein (SRP54) mRNA, complete cds
AK386723|fprW25D07	248	37	0	0	2.74474	Signal recognition particle 54 kDa protein OS=Pongo abelii GN=SRP54 PE=2 SV=1	Putative signal recognition particle 54 kDa protein GN=SRP54 OS=Bombyx mori (Silk moth) PE=2 SV=1	IPR000897: Signal recognition particle, SRP54 subunit, GTPase; IPR003593: ATPase, AAA+ type, core; IPR004125: Signal recognition particle, SRP54 subunit, M-domain; IPR006325: Signal recognition particle, SRP54 subunit; IPR013822: Signal recognition particle, SRP54 subunit, helical bundle	putative signal recognition particle 54 kDa protein [Bombyx mori] >gi|111608119|gb|ABH10803.1| putative signal recognition particle 54 kDa protein [Bombyx mori]	Bombyx mori signal recognition particle 54 kDa protein-like (Srp54), mRNA >gi|111608118|gb|DQ646413.1| Bombyx mori putative signal recognition particle 54 kDa protein (SRP54) mRNA, complete cds
AK384718|fcaL34I24_K00592	134	20	0	0	2.74416	SUMO-conjugating enzyme UBC9-A OS=Danio rerio GN=ube2ia PE=1 SV=1	Ubiquitin-conjugating enzyme E2 isoform 1 OS=Bombyx mori (Silk moth) PE=2 SV=1	IPR000608: Ubiquitin-conjugating enzyme, E2; IPR016135: Ubiquitin-conjugating enzyme/RWD-like; IPR023313: Ubiquitin-conjugating enzyme, active site	ubiquitin-conjugating enzyme E2 [Bombyx mori] >gi|95102776|gb|ABF51329.1| ubiquitin-conjugating enzyme E2 isoform 1 [Bombyx mori]	Bombyx mori ubiquitin-conjugating enzyme E2 (LOC732943), mRNA >gi|95102775|gb|DQ443240.1| Bombyx mori ubiquitin-conjugating enzyme E2 isoform 1 mRNA, complete cds
AK382153|fdpe08M19	126	19	0	0	2.72935	Probable glutaminyl-tRNA synthetase OS=Drosophila melanogaster GN=Aats-gln PE=1 SV=1	Putative uncharacterized protein GN=KGM_05260 OS=Danaus plexippus (Monarch butterfly) PE=3 SV=1	IPR000924: Glutamyl/glutaminyl-tRNA synthetase, class Ib; IPR001412: Aminoacyl-tRNA synthetase, class I, conserved site; IPR004514: Glutaminyl-tRNA synthetase, class Ib; IPR007638: Glutaminyl-tRNA synthetase, class Ib, non-specific RNA-binding domain 2; IPR007639: Glutaminyl-tRNA synthetase, class Ib, non-specific RNA-binding domain, N-terminal; IPR011035: Ribosomal protein L25/Gln-tRNA synthetas…	glutaminyl-trna synthetase [Aedes aegypti] >gi|108872298|gb|EAT36523.1| glutaminyl-trna synthetase [Aedes aegypti]	TSA: Bemisia tabaci BT_Q_ZJU_Singletons25399 mRNA sequence
gnl|UG|Bmo#S58878827	126	19	0	0	2.72935	Probable glutaminyl-tRNA synthetase OS=Drosophila melanogaster GN=Aats-gln PE=1 SV=1	Putative uncharacterized protein GN=KGM_05260 OS=Danaus plexippus (Monarch butterfly) PE=3 SV=1	IPR000924: Glutamyl/glutaminyl-tRNA synthetase, class Ib; IPR001412: Aminoacyl-tRNA synthetase, class I, conserved site; IPR004514: Glutaminyl-tRNA synthetase, class Ib; IPR007638: Glutaminyl-tRNA synthetase, class Ib, non-specific RNA-binding domain 2; IPR007639: Glutaminyl-tRNA synthetase, class Ib, non-specific RNA-binding domain, N-terminal; IPR011035: Ribosomal protein L25/Gln-tRNA synthetas…	glutaminyl-trna synthetase [Aedes aegypti] >gi|108872298|gb|EAT36523.1| glutaminyl-trna synthetase [Aedes aegypti]	TSA: Bemisia tabaci BT_Q_ZJU_Singletons25399 mRNA sequence
BGIBMGA005635-TA	132	20	0	0	2.72247	Serine/arginine-rich splicing factor 2 OS=Rattus norvegicus GN=Srsf2 PE=1 SV=3	Sr protein OS=Bombyx mori (Silk moth) PE=2 SV=1	IPR000504: RNA recognition motif domain; IPR012677: Nucleotide-binding, alpha-beta plait	Sr protein [Bombyx mori] >gi|87248221|gb|ABD36163.1| Sr protein [Bombyx mori]	Bombyx mori Sr protein (LOC692842), mRNA >gi|87248220|gb|DQ311218.1| Bombyx mori Sr protein mRNA, complete cds
gnl|UG|Bmo#S58875205	171	26	0	0	2.71741	Alanine aminotransferase 2 OS=Xenopus tropicalis GN=gpt2 PE=2 SV=1	Putative alanine aminotransferase GN=KGM_12960 OS=Danaus plexippus (Monarch butterfly) PE=4 SV=1	IPR001176: 1-aminocyclopropane-1-carboxylate synthase; IPR004839: Aminotransferase, class I/classII; IPR015421: Pyridoxal phosphate-dependent transferase, major region, subdomain 1; IPR015422: Pyridoxal phosphate-dependent transferase, major region, subdomain 2; IPR015424: Pyridoxal phosphate-dependent transferase, major domain	alanine aminotransferase [Aedes aegypti] >gi|108873981|gb|EAT38206.1| alanine aminotransferase [Aedes aegypti]	TSA: Spodoptera littoralis CL1489Contig1.Spli mRNA sequence
AK384105|fcaL07O08	171	26	0	0	2.71741	Alanine aminotransferase 2 OS=Xenopus tropicalis GN=gpt2 PE=2 SV=1	Putative alanine aminotransferase GN=KGM_12960 OS=Danaus plexippus (Monarch butterfly) PE=4 SV=1	IPR001176: 1-aminocyclopropane-1-carboxylate synthase; IPR004839: Aminotransferase, class I/classII; IPR015421: Pyridoxal phosphate-dependent transferase, major region, subdomain 1; IPR015422: Pyridoxal phosphate-dependent transferase, major region, subdomain 2; IPR015424: Pyridoxal phosphate-dependent transferase, major domain	alanine aminotransferase [Aedes aegypti] >gi|108873981|gb|EAT38206.1| alanine aminotransferase [Aedes aegypti]	TSA: Spodoptera littoralis CL1489Contig1.Spli mRNA sequence
BGIBMGA007410-TA	111	17	0	0	2.70695	RNA-binding protein lark OS=Drosophila melanogaster GN=lark PE=1 SV=1	Lark-PA GN=lark OS=Bombyx mori (Silk moth) PE=2 SV=1	IPR000504: RNA recognition motif domain; IPR001878: Zinc finger, CCHC-type; IPR012677: Nucleotide-binding, alpha-beta plait; IPR013084: Zinc finger, CCHC retroviral-type	RNA-binding protein lark [Bombyx mori] >gi|57236850|gb|AAW48898.1| lark-PA [Bombyx mori]	Bombyx mori RNA-binding protein lark (Lark), mRNA >gi|57236849|gb|AY846357.1| Bombyx mori lark-PA (lark) mRNA, complete cds, alternatively spliced
gnl|UG|Bmo#S31276431	149	23	0	0	2.69561	Proteasome subunit alpha type-7-1 OS=Drosophila melanogaster GN=Pros28.1 PE=1 SV=2	Proteasome subunit alpha type OS=Bombyx mori (Silk moth) PE=2 SV=1	IPR000426: Proteasome, alpha-subunit, conserved site; IPR001353: Proteasome, subunit alpha/beta; IPR023332: Proteasome A-type subunit	proteasome beta-subunit [Bombyx mori] >gi|87248385|gb|ABD36245.1| proteasome beta-subunit [Bombyx mori]	Bombyx mori proteasome beta-subunit (LOC692896), mRNA >gi|87248384|gb|DQ311301.1| Bombyx mori proteasome beta-subunit mRNA, complete cds
AK385705|fphe04K12	110	17	0	0	2.6939	Proteasome maturation protein OS=Mus musculus GN=Pomp PE=2 SV=1	Putative uncharacterized protein GN=KGM_05069 OS=Danaus plexippus (Monarch butterfly) PE=4 SV=1	IPR008012: Proteasome maturation factor UMP1	PREDICTED: similar to MGC89819 protein [Nasonia vitripennis]	--
BGIBMGA004993-TA	194	30	0	0	2.69302	Signal recognition particle 54 kDa protein OS=Pongo abelii GN=SRP54 PE=2 SV=1	Putative signal recognition particle 54 kDa protein GN=SRP54 OS=Bombyx mori (Silk moth) PE=2 SV=1	IPR000897: Signal recognition particle, SRP54 subunit, GTPase; IPR001533: Transcriptional coactivator/pterin dehydratase; IPR002646: Poly A polymerase, head domain; IPR003593: ATPase, AAA+ type, core; IPR004125: Signal recognition particle, SRP54 subunit, M-domain; IPR006325: Signal recognition particle, SRP54 subunit; IPR013822: Signal recognition particle, SRP54 subunit, helical bundle	putative signal recognition particle 54 kDa protein [Bombyx mori] >gi|111608119|gb|ABH10803.1| putative signal recognition particle 54 kDa protein [Bombyx mori]	Bombyx mori signal recognition particle 54 kDa protein-like (Srp54), mRNA >gi|111608118|gb|DQ646413.1| Bombyx mori putative signal recognition particle 54 kDa protein (SRP54) mRNA, complete cds
AK386052|fphe18O05	200	31	0	0	2.68966	Receptor expression-enhancing protein 5 OS=Rattus norvegicus GN=Reep5 PE=1 SV=1	Receptor expression enhancing protein isoform 2 OS=Bombyx mori (Silk moth) PE=2 SV=1	IPR004345: TB2/DP1/HVA22-related protein	receptor expression enhancing protein isoform 2 [Bombyx mori] >gi|87248617|gb|ABD36361.1| receptor expression enhancing protein isoform 2 [Bombyx mori]	Bombyx mori receptor expression enhancing protein (LOC693111), transcript variant 2, mRNA >gi|87248616|gb|DQ311417.1| Bombyx mori receptor expression enhancing protein isoform 2 mRNA, complete cds
gnl|UG|Bmo#S58873257	200	31	0	0	2.68966	Receptor expression-enhancing protein 5 OS=Rattus norvegicus GN=Reep5 PE=1 SV=1	Receptor expression enhancing protein isoform 2 OS=Bombyx mori (Silk moth) PE=2 SV=1	IPR004345: TB2/DP1/HVA22-related protein	receptor expression enhancing protein isoform 2 [Bombyx mori] >gi|87248617|gb|ABD36361.1| receptor expression enhancing protein isoform 2 [Bombyx mori]	Bombyx mori receptor expression enhancing protein (LOC693111), transcript variant 2, mRNA >gi|87248616|gb|DQ311417.1| Bombyx mori receptor expression enhancing protein isoform 2 mRNA, complete cds
gnl|UG|Bmo#S58879332	316	49	0	0	2.68907	Transmembrane emp24 domain-containing protein 5 OS=Rattus norvegicus GN=Tmed5 PE=2 SV=1	Putative cop-coated vesicle membrane protein P24 GN=KGM_07798 OS=Danaus plexippus (Monarch butterfly) PE=3 SV=1	IPR009038: GOLD	PREDICTED: similar to cop-coated vesicle membrane protein P24 [Tribolium castaneum] >gi|270013945|gb|EFA10393.1| hypothetical protein TcasGA2_TC012624 [Tribolium castaneum]	TSA: Striacosta albicosta stalb_01_00001410 mRNA sequence
AK383846|MFB-24F07	316	49	0	0	2.68907	Transmembrane emp24 domain-containing protein 5 OS=Rattus norvegicus GN=Tmed5 PE=2 SV=1	Putative cop-coated vesicle membrane protein P24 GN=KGM_07798 OS=Danaus plexippus (Monarch butterfly) PE=3 SV=1	IPR009038: GOLD	PREDICTED: similar to cop-coated vesicle membrane protein P24 [Tribolium castaneum] >gi|270013945|gb|EFA10393.1| hypothetical protein TcasGA2_TC012624 [Tribolium castaneum]	TSA: Striacosta albicosta stalb_01_00001410 mRNA sequence
AK381155|fufe33G15	148	23	0	0	2.68589	--	--	--	--	Bombyx mori genomic DNA, chromosome 12, BAC clone:544I15, complete sequence
gnl|UG|Bmo#S31276463	180	28	0	0	2.6845	ER lumen protein retaining receptor OS=Drosophila melanogaster GN=KdelR PE=2 SV=1	ER lumen protein retaining receptor OS=Bombyx mori (Silk moth) PE=2 SV=1	IPR000133: ER lumen protein retaining receptor	KDEL endoplasmic reticulum protein retention receptor 2 [Bombyx mori] >gi|87248321|gb|ABD36213.1| KDEL endoplasmic reticulum protein retention receptor 2a [Bombyx mori]	Bombyx mori KDEL endoplasmic reticulum protein retention receptor 2 (ERD2), mRNA >gi|87248320|gb|DQ311268.1| Bombyx mori KDEL endoplasmic reticulum protein retention receptor 2a mRNA, complete cds
BGIBMGA004302-TA	167	26	0	0	2.68326	Eukaryotic translation initiation factor 2 subunit 1 OS=Drosophila melanogaster GN=eIF-2alpha PE=1 SV=1	Eukaryotic translation initiation factor 2 alpha subunit OS=Bombyx mori (Silk moth) PE=2 SV=1	IPR003029: Ribosomal protein S1, RNA-binding domain; IPR011488: Translation initiation factor 2, alpha subunit; IPR012340: Nucleic acid-binding, OB-fold; IPR016027: Nucleic acid-binding, OB-fold-like; IPR022967: RNA-binding domain, S1; IPR024054: Translation initiation factor 2, alpha subunit, middle domain; IPR024055: Translation initiation factor 2, alpha subunit, C-terminal	eukaryotic translation initiation factor 2 alpha subunit [Bombyx mori] >gi|66736329|gb|AAY54260.1| eukaryotic translation initiation factor 2 alpha subunit [Bombyx mori]	Bombyx mori eukaryotic translation initiation factor 2 alpha subunit (LOC693063), mRNA >gi|66736328|gb|DQ073458.1| Bombyx mori eukaryotic translation initiation factor 2 alpha subunit mRNA, complete cds
BGIBMGA004822-TA	154	24	0	0	2.68182	Eukaryotic initiation factor 4A-III OS=Rattus norvegicus GN=Eif4a3 PE=1 SV=1	EIF4AIII protein OS=Bombyx mori (Silk moth) PE=2 SV=1	IPR000629: RNA helicase, ATP-dependent, DEAD-box, conserved site; IPR001650: Helicase, C-terminal; IPR011545: DNA/RNA helicase, DEAD/DEAH box type, N-terminal; IPR014001: DEAD-like helicase; IPR014014: RNA helicase, DEAD-box type, Q motif	eukaryotic initiation factor 4A-III [Bombyx mori] >gi|110376569|gb|ABG73410.1| eIF4AIII protein [Bombyx mori]	Bombyx mori eukaryotic initiation factor 4A-III (eIF4AIII), mRNA >gi|110376568|gb|DQ667967.1| Bombyx mori eIF4AIII protein mRNA, complete cds
gnl|UG|Bmo#S58872896	429	67	0	0	2.67874	Calmodulin OS=Locusta migratoria PE=1 SV=2	Putative uncharacterized protein GN=BRAFLDRAFT_57361 OS=Branchiostoma floridae (Florida lancelet) PE=4 SV=1	--	GJ20779 [Drosophila virilis] >gi|260836493|ref|XP_002613240.1| hypothetical protein BRAFLDRAFT_57361 [Branchiostoma floridae] >gi|194144179|gb|EDW60575.1| GJ20779 [Drosophila virilis] >gi|229298625|gb|EEN69249.1| hypothetical protein BRAFLDRAFT_57361 [Branchiostoma floridae]	Bombyx mori calmodulin (LOC692927), mRNA >gi|87248464|gb|DQ311341.1| Bombyx mori calmodulin mRNA, complete cds
AK386408|fprW06L23	429	67	0	0	2.67874	Calmodulin OS=Locusta migratoria PE=1 SV=2	Putative uncharacterized protein GN=BRAFLDRAFT_57361 OS=Branchiostoma floridae (Florida lancelet) PE=4 SV=1	--	GJ20779 [Drosophila virilis] >gi|260836493|ref|XP_002613240.1| hypothetical protein BRAFLDRAFT_57361 [Branchiostoma floridae] >gi|194144179|gb|EDW60575.1| GJ20779 [Drosophila virilis] >gi|229298625|gb|EEN69249.1| hypothetical protein BRAFLDRAFT_57361 [Branchiostoma floridae]	Bombyx mori calmodulin (LOC692927), mRNA >gi|87248464|gb|DQ311341.1| Bombyx mori calmodulin mRNA, complete cds
BGIBMGA000132-TA	115	18	0	0	2.67557	Neutral alpha-glucosidase AB OS=Sus scrofa GN=GANAB PE=1 SV=1	Putative uncharacterized protein GN=KGM_05737 OS=Danaus plexippus (Monarch butterfly) PE=4 SV=1	IPR000322: Glycoside hydrolase, family 31; IPR011013: Glycoside hydrolase-type carbohydrate-binding; IPR017853: Glycoside hydrolase, superfamily	PREDICTED: similar to CG14476-PB, isoform B isoform 2 [Apis mellifera]	Ixodes scapularis glucosidase II, putative, mRNA
gnl|UG|Bmo#S50140272	102	16	0	0	2.67243	Proteasome maturation protein OS=Mus musculus GN=Pomp PE=2 SV=1	Putative uncharacterized protein GN=KGM_05069 OS=Danaus plexippus (Monarch butterfly) PE=4 SV=1	IPR008012: Proteasome maturation factor UMP1	PREDICTED: similar to MGC89819 protein [Nasonia vitripennis]	--
AK383005|fepM18G16	121	19	0	0	2.67094	Heat shock factor-binding protein 1 OS=Pongo abelii GN=HSBP1 PE=3 SV=1	Heat shock factor binding protein 1-like protein GN=KGM_00880 OS=Danaus plexippus (Monarch butterfly) PE=4 SV=1	IPR009643: Heat shock factor binding 1	heat shock factor binding protein 1-like [Nasonia vitripennis]	TSA: Spodoptera littoralis CL408Contig1.Spli mRNA sequence
gnl|UG|Bmo#S58872336	121	19	0	0	2.67094	Heat shock factor-binding protein 1 OS=Pongo abelii GN=HSBP1 PE=3 SV=1	Heat shock factor binding protein 1-like protein GN=KGM_00880 OS=Danaus plexippus (Monarch butterfly) PE=4 SV=1	IPR009643: Heat shock factor binding 1	heat shock factor binding protein 1-like [Nasonia vitripennis]	TSA: Spodoptera littoralis CL408Contig1.Spli mRNA sequence
AK386238|fphe27K02	191	30	0	0	2.67054	Proteasome subunit alpha type-7-1 OS=Drosophila melanogaster GN=Pros28.1 PE=1 SV=2	Proteasome subunit alpha type OS=Bombyx mori (Silk moth) PE=2 SV=1	IPR000426: Proteasome, alpha-subunit, conserved site; IPR001353: Proteasome, subunit alpha/beta; IPR023332: Proteasome A-type subunit	proteasome beta-subunit [Bombyx mori] >gi|87248385|gb|ABD36245.1| proteasome beta-subunit [Bombyx mori]	Bombyx mori proteasome beta-subunit (LOC692896), mRNA >gi|87248384|gb|DQ311301.1| Bombyx mori proteasome beta-subunit mRNA, complete cds
gnl|UG|Bmo#S32129958	133	21	0	0	2.66297	UV excision repair protein RAD23 homolog A OS=Homo sapiens GN=RAD23A PE=1 SV=1	Nuclear excision repair protein Rad23 OS=Bombyx mori (Silk moth) PE=2 SV=1	IPR000449: Ubiquitin-associated/translation elongation factor EF1B, N-terminal; IPR000626: Ubiquitin; IPR009060: UBA-like; IPR015940: Ubiquitin-associated/translation elongation factor EF1B, N-terminal, eukaryote; IPR019955: Ubiquitin supergroup	nuclear excision repair protein rad23 [Bombyx mori] >gi|217331039|gb|ACK38234.1| nuclear excision repair protein Rad23 [Bombyx mori]	Bombyx mori nuclear excision repair protein rad23 (Rad23), mRNA >gi|217331038|gb|FJ194550.1| Bombyx mori nuclear excision repair protein Rad23 mRNA, complete cds
gnl|UG|Bmo#S58876429	183	29	0	0	2.65772	Transitional endoplasmic reticulum ATPase TER94 OS=Drosophila melanogaster GN=TER94 PE=1 SV=1	Transitional endoplasmic reticulum ATPase TER94 GN=ter94 OS=Bombyx mori (Silk moth) PE=2 SV=1	IPR003338: ATPase, AAA-type, VAT, N-terminal; IPR003593: ATPase, AAA+ type, core; IPR003959: ATPase, AAA-type, core; IPR003960: ATPase, AAA-type, conserved site; IPR004201: Cell division protein 48, Cdc48, domain 2; IPR005938: ATPase, AAA-type, CDC48; IPR009010: Aspartate decarboxylase-like fold; IPR015415: Vps4 oligomerisation, C-terminal	transitional endoplasmic reticulum ATPase TER94 [Bombyx mori] >gi|83423461|dbj|BAE54254.1| transitional endoplasmic reticulum ATPase TER94 [Bombyx mori] >gi|95102992|gb|ABF51437.1| transitional endoplasmic reticulum ATPase TER94 [Bombyx mori]	Bombyx mori transitional endoplasmic reticulum ATPase TER94 mRNA, complete cds
AK385837|fphe10L12	183	29	0	0	2.65772	Transitional endoplasmic reticulum ATPase TER94 OS=Drosophila melanogaster GN=TER94 PE=1 SV=1	Transitional endoplasmic reticulum ATPase TER94 GN=ter94 OS=Bombyx mori (Silk moth) PE=2 SV=1	IPR003338: ATPase, AAA-type, VAT, N-terminal; IPR003593: ATPase, AAA+ type, core; IPR003959: ATPase, AAA-type, core; IPR003960: ATPase, AAA-type, conserved site; IPR004201: Cell division protein 48, Cdc48, domain 2; IPR005938: ATPase, AAA-type, CDC48; IPR009010: Aspartate decarboxylase-like fold; IPR015415: Vps4 oligomerisation, C-terminal	transitional endoplasmic reticulum ATPase TER94 [Bombyx mori] >gi|83423461|dbj|BAE54254.1| transitional endoplasmic reticulum ATPase TER94 [Bombyx mori] >gi|95102992|gb|ABF51437.1| transitional endoplasmic reticulum ATPase TER94 [Bombyx mori]	Bombyx mori transitional endoplasmic reticulum ATPase TER94 mRNA, complete cds
BGIBMGA003985-TA	189	30	0	0	2.65535	Transitional endoplasmic reticulum ATPase TER94 OS=Drosophila melanogaster GN=TER94 PE=1 SV=1	Transitional endoplasmic reticulum ATPase TER94 GN=ter94 OS=Bombyx mori (Silk moth) PE=2 SV=1	IPR003338: ATPase, AAA-type, VAT, N-terminal; IPR003593: ATPase, AAA+ type, core; IPR003959: ATPase, AAA-type, core; IPR003960: ATPase, AAA-type, conserved site; IPR004201: Cell division protein 48, Cdc48, domain 2; IPR005938: ATPase, AAA-type, CDC48; IPR009010: Aspartate decarboxylase-like fold; IPR015415: Vps4 oligomerisation, C-terminal	transitional endoplasmic reticulum ATPase TER94 [Bombyx mori] >gi|83423461|dbj|BAE54254.1| transitional endoplasmic reticulum ATPase TER94 [Bombyx mori] >gi|95102992|gb|ABF51437.1| transitional endoplasmic reticulum ATPase TER94 [Bombyx mori]	Bombyx mori transitional endoplasmic reticulum ATPase TER94 mRNA, complete cds
[truncated: 935 more rows]

## Sheet: Sup Table 8
Supplemental Table 8 Cluter_frequency of differentially altered transcripts mapped pathway from the posterior silk gland at 3rd day of 5th instar
Kegg pathway	ko ID	Cluter frequency	Genome frequency	P-value
up-regulated
Oxidative phosphorylation	ko00190	78 out of 1700 (4.59%)	543 out of 21964 (2.47%)	1.17424e-05
[truncated: 18 more rows]

## Sheet: Sup Table 9
Supplemental Table 9 The coordination between proteins and transcripts from the posterior silk gland at 3rd day of 5th instar
[truncated: 54 more rows]

[truncated: 1 more sheets: Sup Table 10]
